# Supplementary material for: Integrative proteogenomic analyses discover novel plasma proteins that impact risk of ischemic stroke
Source: Research Square preprint supplement (doi:10.21203/rs.3.rs-7222618/v1), 2025-08-04
Supplement: Supplementary file 2 [file c80ef537f2cb89c43f4f3e75.xlsx]

## Sheet: List of Supplementary Tables
Table S1. Descriptive characteristics of the genome-wide association studies used in this study.
Table S2. Association of plasma proteins with any ischemic stroke and its subtypes in a two-sample Mendelian randomization framework.
Table S3. Association of plasma proteins with any ischemic stroke using the multi-ancestry GIGASTROKE dataset in a two-sample Mendelian randomization framework.
Table S4. Results of the bi-directional Mendelian randomization analysis.
Table S5. Results of the co-localisation analysis between plasma protein abundance and ischemic stroke phenotypes assuming a single causal variant.
Table S6. Association of plasma proteins with ischemic stroke risk factors in a two-sample Mendelian randomization framework.
Table S7. Results of the co-localisation analysis between plasma protein abundance and ischemic stroke risk factors assuming a single causal variant.
Table S8. Phenome-wide Mendelian randomization analysis in FinnGen.
Table S9. Phenome-wide Mendelian randomization analysis in the UK Biobank.

## Sheet: Table S1
Table S1. Descriptive characteristics of the genome-wide association studies used in this study.
Trait	PMID	First author	Year	Sample size	N cases (if binary)	N controls (if binary)
Ischemic stroke and its subtypes
Any ischemic stroke	36180795	Mishra A	2022	1296908	62100	1234808
Cardioembolic stroke	36180795	Mishra A	2022	1245612	10804	1234808
Large artery stroke	36180795	Mishra A	2022	1241207	6399	1234808
Small vessel stroke	36180795	Mishra A	2022	1241619	6811	1234808
Protein abundance
Olink platform	37794186	Sun B	2023	35571
SomaScan platform	34857953	Ferkingstad E	2021	35559
Ischemic stroke risk factors
Atrial fibrillation	29892015	Roselli C	2018	537409	55114	482295
Body mass index	30239722	Pulit S	2018	694649
Ever smoking	36477530	Saunders G	2022	2669029	1175107	1493922
Systolic blood pressure	30224653	Evangelou E	2018	757601
Type 2 diabetes mellitus	35551307	Mahajan A	2022	933970	80154	853816

## Sheet: Table S2
Table S2. Association of plasma proteins with any ischemic stroke and its subtypes in a two-sample Mendelian randomization framework.
Outcome	Platform	Assay ID	UniProtID	Protein	Method	Number of genetic variants	Beta	Standard error	P	FDR
Ischemic stroke	Olink	OID20066	P34947	GRK5	Wald ratio	1	-0.19097	0.0279828	8.81943e-12	1.20518e-07
Ischemic stroke	Olink	OID30773	P03951	F11	Inverse variance weighted (fixed effects)	2	0.11215	0.0197736	1.41388e-08	7.64555e-05
Ischemic stroke	SomaScan	2190_55	P03951	F11	Inverse variance weighted (fixed effects)	3	0.117494	0.020824	1.6785e-08	7.64555e-05
Ischemic stroke	Olink	OID21439	P39900	MMP12	Inverse variance weighted (fixed effects)	3	-0.0803396	0.0145595	3.42833e-08	9.36962e-05
Cardioembolic stroke	SomaScan	2190_55	P03951	F11	Inverse variance weighted (fixed effects)	3	0.263859	0.0476204	3.00971e-08	9.36962e-05
Ischemic stroke	Olink	OID21222	Q9UQQ2	SH2B3	Wald ratio	1	0.569518	0.106244	8.3008e-08	0.000189051
Ischemic stroke	Olink	OID21514	P09958	FURIN	Inverse variance weighted (fixed effects)	2	0.203172	0.0390893	2.0182e-07	0.000344733
Ischemic stroke	SomaScan	4496_60	P39900	MMP12	Inverse variance weighted (fixed effects)	3	-0.0834872	0.0159937	1.78903e-07	0.000344733
Large artery stroke	SomaScan	4496_60	P39900	MMP12	Inverse variance weighted (fixed effects)	3	-0.24645	0.0491816	5.41406e-07	0.000822035
Large artery stroke	Olink	OID21439	P39900	MMP12	Inverse variance weighted (fixed effects)	3	-0.220222	0.0449805	9.78291e-07	0.00133683
Cardioembolic stroke	Olink	OID30773	P03951	F11	Inverse variance weighted (fixed effects)	2	0.206867	0.0447351	3.75933e-06	0.00467012
Small vessel stroke	SomaScan	11117_2	Q8TB22	SPATA20	Inverse variance weighted (fixed effects)	2	0.301895	0.0656264	4.22084e-06	0.00480648
Ischemic stroke	SomaScan	4152_58	P03952	KLKB1	Inverse variance weighted (fixed effects)	3	0.0828758	0.0182973	5.91529e-06	0.00621788
Ischemic stroke	Olink	OID30159	P22033	MMUT	Wald ratio	1	-0.326044	0.072892	7.71395e-06	0.00731864
Ischemic stroke	Olink	OID21241	Q6P2H3	CEP85	Wald ratio	1	-0.426642	0.0955677	8.03363e-06	0.00731864
Ischemic stroke	SomaScan	15343_337	P01042	KNG1	Inverse variance weighted (fixed effects)	3	0.0824563	0.0186935	1.02908e-05	0.00878896
Ischemic stroke	Olink	OID30149	Q9UNN8	PROCR	Wald ratio	1	-0.0905097	0.0216924	3.0139e-05	0.0242264
Ischemic stroke	SomaScan	17490_4	Q9H299	SH3BGRL3	Inverse variance weighted (fixed effects)	2	-0.116332	0.0281908	3.68158e-05	0.0279493
Small vessel stroke	Olink	OID20275	P08118	MSMB	Inverse variance weighted (fixed effects)	2	0.239882	0.0591519	5.00577e-05	0.0346407
Small vessel stroke	SomaScan	10620_21	P08118	MSMB	Inverse variance weighted (fixed effects)	2	0.198228	0.0489164	5.06998e-05	0.0346407
Ischemic stroke	SomaScan	19558_10	O75096	LRP4	Inverse variance weighted (fixed effects)	3	0.0755693	0.0189665	6.76625e-05	0.044029
Ischemic stroke	SomaScan	9870_17	P23381	WARS	Inverse variance weighted (fixed effects)	2	0.123075	0.0312858	8.35816e-05	0.0519155
Ischemic stroke	SomaScan	4157_2	P00734	F2	Inverse variance weighted (fixed effects)	2	0.232949	0.0599987	0.000103362	0.0614108
Cardioembolic stroke	SomaScan	2381_52	P01031	C5	Inverse variance weighted (fixed effects)	2	-0.48816	0.127032	0.000121628	0.0692521
Small vessel stroke	Olink	OID30702	Q08830	FGL1	Inverse variance weighted (fixed effects)	3	0.152004	0.0398883	0.000138544	0.0757283
Ischemic stroke	SomaScan	19365_11	O15382	BCAT2	Wald ratio	1	-0.209756	0.0554878	0.00015669	0.0823526
Ischemic stroke	Olink	OID21489	P21741	MDK	Inverse variance weighted (fixed effects)	2	0.295005	0.0784053	0.000168182	0.0835085
Ischemic stroke	SomaScan	8687_26	Q9NUM4	TMEM106B	Wald ratio	1	-0.306452	0.0815412	0.000171112	0.0835085
Large artery stroke	SomaScan	4925_54	P45452	MMP13	Wald ratio	1	1.43042	0.381877	0.000179847	0.0847449
Ischemic stroke	SomaScan	4925_54	P45452	MMP13	Wald ratio	1	0.470874	0.126214	0.000190896	0.0869531
Small vessel stroke	SomaScan	8296_117	Q7Z4H8	KDELC2	Wald ratio	1	-0.248504	0.0672747	0.00022086	0.0973566
Ischemic stroke	SomaScan	16607_78	P06396	GSN	Wald ratio	1	0.143562	0.0391533	0.000245733	0.104936
Cardioembolic stroke	Olink	OID30723	P00734	F2	Inverse variance weighted (fixed effects)	2	0.507434	0.139058	0.000263167	0.108975
Large artery stroke	Olink	OID21416	P06756	ITGAV	Inverse variance weighted (fixed effects)	2	0.501594	0.138099	0.000281087	0.109744
Small vessel stroke	Olink	OID31043	O94830	DDHD2	Wald ratio	1	-0.774938	0.213016	0.000274837	0.109744
Ischemic stroke	Olink	OID30297	Q14914	PTGR1	Inverse variance weighted (fixed effects)	3	0.079647	0.0220414	0.000302063	0.114658
Ischemic stroke	Olink	OID21461	Q9H4F8	SMOC1	Inverse variance weighted (fixed effects)	3	-0.0885608	0.0246443	0.000326193	0.120471
Large artery stroke	SomaScan	9848_22	P51946	CCNH	Wald ratio	1	-0.944964	0.263759	0.000340091	0.122298
Ischemic stroke	SomaScan	18401_18	Q96Q83	ALKBH3	Inverse variance weighted (fixed effects)	2	0.106616	0.0298541	0.000355307	0.124494
Large artery stroke	Olink	OID21191	Q9NS15	LTBP3	Inverse variance weighted (fixed effects)	2	0.241788	0.0683398	0.000403122	0.134358
Small vessel stroke	Olink	OID21375	Q8IXJ6	SIRT2	Inverse variance weighted (fixed effects)	2	0.791374	0.223387	0.000396188	0.134358
Cardioembolic stroke	SomaScan	4157_2	P00734	F2	Wald ratio	1	0.523556	0.148444	0.000420382	0.136774
Ischemic stroke	Olink	OID30268	Q16621	NFE2	Wald ratio	1	-0.384345	0.109379	0.000441597	0.140336
Cardioembolic stroke	SomaScan	8773_172	Q9NT22	EMILIN3	Inverse variance weighted (fixed effects)	2	-0.205816	0.0588292	0.000467809	0.145286
Small vessel stroke	Olink	OID21406	P47929;P47929	LGALS7B;LGALS7	Inverse variance weighted (fixed effects)	2	-0.316152	0.0907458	0.000494115	0.150046
Large artery stroke	Olink	OID20285	Q9H1U4	MEGF9	Inverse variance weighted (fixed effects)	2	-0.24101	0.0693184	0.000507331	0.15071
Ischemic stroke	Olink	OID21084	P23381	WARS1	Inverse variance weighted (fixed effects)	2	0.106386	0.0306516	0.000518904	0.150869
Small vessel stroke	Olink	OID30159	P22033	MMUT	Wald ratio	1	-0.692474	0.199961	0.000534081	0.152046
Small vessel stroke	Olink	OID30402	Q8TDY8	IGDCC4	Inverse variance weighted (fixed effects)	2	0.265403	0.0769742	0.000564851	0.157524
Large artery stroke	Olink	OID21170	O14662	STX16	Wald ratio	1	1.2715	0.36951	0.000579466	0.158368
Cardioembolic stroke	Olink	OID30298	Q6UW49	SPESP1	Wald ratio	1	-0.630545	0.18393	0.000607633	0.161387
Large artery stroke	Olink	OID31094	Q5VV43	KIAA0319	Inverse variance weighted (fixed effects)	2	-0.245373	0.0716356	0.000614132	0.161387
Cardioembolic stroke	SomaScan	15343_337	P01042	KNG1	Inverse variance weighted (fixed effects)	3	0.144102	0.0421356	0.000626296	0.161478
Ischemic stroke	SomaScan	9816_37	Q96CN7	ISOC1	Inverse variance weighted (fixed effects)	2	0.148447	0.0435669	0.000656025	0.163255
Cardioembolic stroke	SomaScan	19556_12	P17927	CR1	Inverse variance weighted (fixed effects)	2	-0.138594	0.0406928	0.000659574	0.163255
Cardioembolic stroke	SomaScan	4155_3	P24821	TNC	Inverse variance weighted (fixed effects)	3	-0.133889	0.0393562	0.000669028	0.163255
Ischemic stroke	Olink	OID30241	P50053	KHK	Inverse variance weighted (fixed effects)	2	0.0849073	0.0251499	0.000735365	0.165821
Ischemic stroke	SomaScan	16781_2	Q8NFI3	ENGASE	Inverse variance weighted (fixed effects)	4	0.0535774	0.0158542	0.000726464	0.165821
Ischemic stroke	SomaScan	19523_215	Q99497	PARK7	Wald ratio	1	-0.210106	0.0620567	0.000709933	0.165821
Ischemic stroke	SomaScan	12685_57	Q9NSB8	HOMER2	Wald ratio	1	-0.359255	0.106243	0.000721061	0.165821
Cardioembolic stroke	SomaScan	6927_7	P52848	NDST1	Wald ratio	1	0.409531	0.12137	0.000740217	0.165821
Ischemic stroke	Olink	OID20786	O00468	AGRN	Wald ratio	1	-0.0961495	0.0286036	0.000775356	0.170891
Ischemic stroke	SomaScan	17327_3	Q9BT09	CNPY3	Wald ratio	1	-0.204836	0.0611664	0.000811515	0.172077
Cardioembolic stroke	Olink	OID30149	Q9UNN8	PROCR	Wald ratio	1	-0.174138	0.0519121	0.000795181	0.172077
Cardioembolic stroke	Olink	OID20066	P34947	GRK5	Wald ratio	1	-0.208644	0.0623477	0.000818515	0.172077
Cardioembolic stroke	Olink	OID30565	O95157	NXPH3	Inverse variance weighted (fixed effects)	2	-0.341876	0.102646	0.000866481	0.179401
Ischemic stroke	SomaScan	15525_294	P00326	ADH1C	Wald ratio	1	0.181392	0.0547303	0.000918776	0.187389
Cardioembolic stroke	Olink	OID30532	Q15399	TLR1	Inverse variance weighted (fixed effects)	3	-0.143324	0.0434211	0.000964098	0.192221
Cardioembolic stroke	SomaScan	10772_21	Q8N6G5	CSGALNACT2	Wald ratio	1	-0.528746	0.160279	0.0009706	0.192221
Ischemic stroke	Olink	OID31522	Q9NPJ3	ACOT13	Wald ratio	1	-0.390493	0.119234	0.00105662	0.200538
Cardioembolic stroke	Olink	OID30341	P51688	SGSH	Inverse variance weighted (fixed effects)	3	0.136606	0.0416943	0.00105149	0.200538
Small vessel stroke	SomaScan	18174_79	Q8WUM4	PDCD6IP	Wald ratio	1	-0.644068	0.196253	0.0010314	0.200538
Ischemic stroke	Olink	OID30788	P02671	FGA	Wald ratio	1	-0.172446	0.0532016	0.00118953	0.202481
Ischemic stroke	Olink	OID20985	Q07011	TNFRSF9	Wald ratio	1	0.165609	0.0514313	0.00128191	0.202481
Ischemic stroke	SomaScan	12703_6	Q8TDX7	NEK7	Wald ratio	1	-0.244312	0.0757676	0.00126197	0.202481
Ischemic stroke	SomaScan	15585_304	Q9UBX5	FBLN5	Wald ratio	1	-0.300358	0.0929678	0.00123458	0.202481
Ischemic stroke	SomaScan	18381_16	P05091	ALDH2	Wald ratio	1	0.306681	0.0952903	0.00128912	0.202481
Ischemic stroke	SomaScan	8255_34	Q9Y6F6	MRVI1	Wald ratio	1	-0.225365	0.0693431	0.00115405	0.202481
Ischemic stroke	SomaScan	16919_1	P07108	DBI	Inverse variance weighted (fixed effects)	2	-0.108597	0.0337265	0.00128218	0.202481
Cardioembolic stroke	Olink	OID21431	P40121	CAPG	Inverse variance weighted (fixed effects)	2	0.111924	0.0344072	0.00114225	0.202481
Cardioembolic stroke	Olink	OID21058	Q6ZMJ2	SCARA5	Inverse variance weighted (fixed effects)	2	-0.164773	0.0506737	0.00114738	0.202481
Large artery stroke	Olink	OID30254	Q12841	FSTL1	Inverse variance weighted (fixed effects)	2	-0.475352	0.147636	0.00128296	0.202481
Large artery stroke	Olink	OID20875	Q9Y2W6	TDRKH	Wald ratio	1	0.222268	0.0688584	0.001247	0.202481
Large artery stroke	Olink	OID31493	O43653	PSCA	Inverse variance weighted (fixed effects)	3	0.0925302	0.0284297	0.0011351	0.202481
Large artery stroke	SomaScan	8480_29	Q12805	EFEMP1	Inverse variance weighted (fixed effects)	2	-0.523523	0.161165	0.00116068	0.202481
Large artery stroke	SomaScan	17447_52	Q6FHJ7	SFRP4	Inverse variance weighted (fixed effects)	2	0.326875	0.100045	0.00108581	0.202481
Small vessel stroke	Olink	OID31094	Q5VV43	KIAA0319	Inverse variance weighted (fixed effects)	2	-0.213118	0.0659594	0.00123336	0.202481
Ischemic stroke	SomaScan	12812_25	P14621	ACYP2	Wald ratio	1	-0.102693	0.0319489	0.00130769	0.203064
Large artery stroke	SomaScan	3518_54	Q96IY4	CPB2	Inverse variance weighted (fixed effects)	2	-0.192672	0.0601913	0.00136951	0.210273
Small vessel stroke	SomaScan	12449_16	O43447	PPIH	Wald ratio	1	1.18104	0.37181	0.00149079	0.226351
Small vessel stroke	Olink	OID21248	P01229	LHB	Wald ratio	1	-1.23221	0.388369	0.0015099	0.226733
Ischemic stroke	Olink	OID31442	P19525	EIF2AK2	Wald ratio	1	-0.150429	0.0474688	0.00152957	0.227186
Small vessel stroke	SomaScan	8255_34	Q9Y6F6	MRVI1	Wald ratio	1	-0.609489	0.192518	0.00154616	0.227186
Ischemic stroke	SomaScan	14151_4	P05161	ISG15	Wald ratio	1	0.0842276	0.0266667	0.00158563	0.230507
Ischemic stroke	SomaScan	16918_198	O15455	TLR3	Inverse variance weighted (fixed effects)	4	-0.0587683	0.0186953	0.00166952	0.240147
Ischemic stroke	SomaScan	2974_61	Q12860	CNTN1	Inverse variance weighted (fixed effects)	2	0.0845337	0.0269199	0.00168836	0.240328
Cardioembolic stroke	SomaScan	12534_10	Q13137	CALCOCO2	Wald ratio	1	-0.589947	0.188713	0.001771	0.249492
Large artery stroke	Olink	OID21489	P21741	MDK	Wald ratio	1	-1.06529	0.341791	0.00182833	0.25494
Ischemic stroke	Olink	OID30702	Q08830	FGL1	Inverse variance weighted (fixed effects)	3	0.0433477	0.0139276	0.00185589	0.256169
Ischemic stroke	SomaScan	17403_14	P45954	ACADSB	Inverse variance weighted (fixed effects)	2	-0.209344	0.0674412	0.00190861	0.260811
Ischemic stroke	Olink	OID21452	P09960	LTA4H	Wald ratio	1	0.221224	0.0714572	0.00196223	0.265484
Cardioembolic stroke	Olink	OID30249	Q13137	CALCOCO2	Wald ratio	1	0.876528	0.283777	0.00200977	0.266636
Large artery stroke	Olink	OID20377	P08174	CD55	Inverse variance weighted (fixed effects)	2	-0.193399	0.0626045	0.00200681	0.266636
Ischemic stroke	Olink	OID30728	Q9Y5Y7	LYVE1	Inverse variance weighted (fixed effects)	2	0.126308	0.0411214	0.0021292	0.269243
Ischemic stroke	Olink	OID20398	P17936	IGFBP3	Inverse variance weighted (fixed effects)	3	-0.0632158	0.0206713	0.0022271	0.269243
Ischemic stroke	Olink	OID20583	P50995	ANXA11	Wald ratio	1	-0.347078	0.113177	0.0021646	0.269243
Ischemic stroke	Olink	OID30341	P51688	SGSH	Inverse variance weighted (fixed effects)	3	0.0567871	0.0184773	0.0021168	0.269243
Cardioembolic stroke	SomaScan	19267_14	Q16775	HAGH	Wald ratio	1	0.329873	0.10807	0.00227018	0.269243
Cardioembolic stroke	SomaScan	15533_97	P21757	MSR1	Inverse variance weighted (fixed effects)	3	-0.212415	0.0689164	0.00205471	0.269243
Cardioembolic stroke	SomaScan	13242_134	Q9BYB0	SHANK3	Inverse variance weighted (fixed effects)	2	0.15171	0.0494485	0.00215461	0.269243
Cardioembolic stroke	SomaScan	7871_16	Q24JP5	TMEM132A	Inverse variance weighted (fixed effects)	2	-0.14476	0.0472286	0.00217607	0.269243
Cardioembolic stroke	SomaScan	9715_15	O75054	IGSF3	Inverse variance weighted (fixed effects)	2	-0.450823	0.146788	0.00213164	0.269243
Large artery stroke	Olink	OID21117	Q8IWV2	CNTN4	Inverse variance weighted (fixed effects)	3	0.233612	0.0763835	0.00222517	0.269243
Large artery stroke	Olink	OID30216	Q14643	ITPR1	Wald ratio	1	-0.732332	0.239514	0.00223135	0.269243
Large artery stroke	SomaScan	3184_25	P08709	F7	Inverse variance weighted (fixed effects)	3	0.189359	0.0620088	0.00226	0.269243
Small vessel stroke	Olink	OID30341	P51688	SGSH	Inverse variance weighted (fixed effects)	3	0.155347	0.0509703	0.00230527	0.269243
Small vessel stroke	SomaScan	17672_184	P27352	GIF	Wald ratio	1	-1.29786	0.425721	0.00229902	0.269243
Ischemic stroke	Olink	OID30723	P00734	F2	Inverse variance weighted (fixed effects)	2	0.188655	0.0620341	0.00235679	0.271521
Ischemic stroke	Olink	OID21207	P07332	FES	Wald ratio	1	-0.16615	0.0548823	0.0024667	0.271521
Ischemic stroke	Olink	OID30311	Q8N4F0	BPIFB2	Inverse variance weighted (fixed effects)	2	-0.0805588	0.0265819	0.00244074	0.271521
Ischemic stroke	SomaScan	4534_10	Q9GZN4	PRSS22	Wald ratio	1	-0.0998746	0.033013	0.00248373	0.271521
Ischemic stroke	SomaScan	9288_7	Q9Y680	FKBP7	Inverse variance weighted (fixed effects)	2	0.0800783	0.0264236	0.00244103	0.271521
Cardioembolic stroke	SomaScan	19558_10	O75096	LRP4	Inverse variance weighted (fixed effects)	2	0.131438	0.0433243	0.00241482	0.271521
Small vessel stroke	Olink	OID31015	Q86YD3	TMEM25	Wald ratio	1	-0.218883	0.0722213	0.0024397	0.271521
Small vessel stroke	SomaScan	8376_25	P01229	LHB	Inverse variance weighted (fixed effects)	2	-0.251286	0.0830335	0.00247546	0.271521
Ischemic stroke	SomaScan	12643_4	P49407	ARRB1	Wald ratio	1	-0.303106	0.100621	0.00259237	0.281149
Large artery stroke	SomaScan	8982_65	P49746	THBS3	Wald ratio	1	1.01327	0.336836	0.00262791	0.282759
Ischemic stroke	Olink	OID21075	P19440	GGT1	Wald ratio	1	0.0932509	0.0310836	0.0026998	0.288224
Ischemic stroke	SomaScan	13552_7	Q9UH65	SWAP70	Inverse variance weighted (fixed effects)	2	-0.0517465	0.0172917	0.00276647	0.293053
Large artery stroke	Olink	OID30343	P23471	PTPRZ1	Inverse variance weighted (fixed effects)	2	-0.312976	0.104686	0.00279284	0.293571
Ischemic stroke	Olink	OID20095	O15354	GPR37	Inverse variance weighted (fixed effects)	2	0.0580969	0.0195292	0.0029311	0.304299
Cardioembolic stroke	Olink	OID30707	P0DUB6;P0DTE7;P0DTE8	AMY1A;AMY1B;AMY1C	Inverse variance weighted (fixed effects)	3	0.157451	0.0529837	0.00296171	0.304299
Cardioembolic stroke	Olink	OID21457	P56159	GFRA1	Inverse variance weighted (fixed effects)	2	-0.207428	0.0697841	0.00295452	0.304299
Cardioembolic stroke	Olink	OID20235	Q8NBP7	PCSK9	Inverse variance weighted (fixed effects)	2	0.316138	0.106578	0.00301446	0.306178
Large artery stroke	SomaScan	10080_9	Q14232	EIF2B1	Wald ratio	1	-1.44888	0.488837	0.00303725	0.306178
Small vessel stroke	Olink	OID21270	P51580	TPMT	Inverse variance weighted (fixed effects)	2	0.179148	0.060463	0.00304721	0.306178
Small vessel stroke	SomaScan	15525_294	P00326	ADH1C	Wald ratio	1	0.460516	0.15559	0.0030784	0.307053
Large artery stroke	Olink	OID31470	P19075	TSPAN8	Inverse variance weighted (fixed effects)	2	0.214861	0.0727867	0.00315807	0.310468
Large artery stroke	Olink	OID20807	P45452	MMP13	Wald ratio	1	0.457398	0.15489	0.00314649	0.310468
Large artery stroke	Olink	OID20363	P30530	AXL	Wald ratio	1	0.424344	0.144128	0.00323767	0.313971
Large artery stroke	SomaScan	7861_9	Q01974	ROR2	Inverse variance weighted (fixed effects)	2	-0.424391	0.144472	0.00330832	0.313971
Small vessel stroke	Olink	OID20810	P08758	ANXA5	Wald ratio	1	0.546542	0.185893	0.00328115	0.313971
Small vessel stroke	Olink	OID21241	Q6P2H3	CEP85	Wald ratio	1	-0.758398	0.258033	0.0032911	0.313971
Small vessel stroke	SomaScan	14158_17	P08758	ANXA5	Inverse variance weighted (fixed effects)	2	0.35732	0.12164	0.00330859	0.313971
Cardioembolic stroke	Olink	OID21063	P21757	MSR1	Inverse variance weighted (fixed effects)	3	-0.228	0.0777701	0.00337091	0.317679
Cardioembolic stroke	SomaScan	11219_95	Q8TAT2	FGFBP3	Wald ratio	1	-0.177763	0.0607412	0.0034274	0.320791
Ischemic stroke	SomaScan	17856_23	Q9NPB1	NT5M	Wald ratio	1	0.181408	0.0620881	0.00348029	0.323525
Ischemic stroke	Olink	OID20657	Q12866	MERTK	Wald ratio	1	0.0809393	0.0278582	0.00366778	0.324432
Cardioembolic stroke	SomaScan	15480_2	O95498	VNN2	Inverse variance weighted (fixed effects)	4	-0.0897215	0.0307948	0.00357373	0.324432
Cardioembolic stroke	SomaScan	10419_1	Q6ZMJ2	SCARA5	Inverse variance weighted (fixed effects)	3	-0.178265	0.061285	0.00362834	0.324432
Large artery stroke	Olink	OID20125	P16860	NPPB	Wald ratio	1	-0.24079	0.082688	0.0035908	0.324432
Large artery stroke	Olink	OID31079	Q92599	SEPTIN8	Wald ratio	1	0.731973	0.251357	0.00359022	0.324432
Large artery stroke	SomaScan	3448_13	P06213	INSR	Wald ratio	1	0.902098	0.309091	0.00351661	0.324432
Small vessel stroke	SomaScan	15509_2	P54802	NAGLU	Inverse variance weighted (fixed effects)	4	-0.167056	0.0574622	0.00364645	0.324432
Small vessel stroke	SomaScan	5478_50	Q04609	FOLH1	Wald ratio	1	-0.384108	0.132252	0.00367998	0.324432
Ischemic stroke	Olink	OID30483	Q9GZN4	PRSS22	Wald ratio	1	-0.0893325	0.0308043	0.00373163	0.325615
Small vessel stroke	Olink	OID30543	P09564	CD7	Inverse variance weighted (fixed effects)	2	-0.146585	0.0505602	0.00374105	0.325615
Large artery stroke	SomaScan	8225_86	P29323	EPHB2	Inverse variance weighted (fixed effects)	2	-0.233192	0.0805519	0.00379241	0.327996
Cardioembolic stroke	Olink	OID30737	P07225	PROS1	Inverse variance weighted (fixed effects)	2	-0.495927	0.171512	0.00383409	0.329514
Small vessel stroke	SomaScan	4254_6	Q8IVD9	NUDCD3	Wald ratio	1	0.920052	0.31848	0.00386606	0.330185
Large artery stroke	SomaScan	12347_29	Q9BSQ5	CCM2	Wald ratio	1	1.04115	0.360768	0.00390257	0.331234
Ischemic stroke	Olink	OID21058	Q6ZMJ2	SCARA5	Inverse variance weighted (fixed effects)	2	-0.0637055	0.0221257	0.00398622	0.332144
Cardioembolic stroke	SomaScan	8480_29	Q12805	EFEMP1	Inverse variance weighted (fixed effects)	2	-0.348194	0.120811	0.00394996	0.332144
Small vessel stroke	SomaScan	3316_58	P05546	SERPIND1	Wald ratio	1	1.23469	0.428571	0.00396476	0.332144
Large artery stroke	SomaScan	17686_27	Q99426	TBCB	Wald ratio	1	1.16961	0.406683	0.00402789	0.333583
Ischemic stroke	Olink	OID30279	Q96DR5	BPIFA2	Wald ratio	1	0.16132	0.0562478	0.00413049	0.337983
Ischemic stroke	SomaScan	9241_40	Q9P1W8	SIRPG	Wald ratio	1	-0.143989	0.0501982	0.00412526	0.337983
Cardioembolic stroke	Olink	OID21514	P09958	FURIN	Inverse variance weighted (fixed effects)	2	0.256044	0.0894743	0.00421447	0.342802
Cardioembolic stroke	Olink	OID31108	Q8TAT2	FGFBP3	Wald ratio	1	-0.136045	0.0476158	0.00427473	0.343613
Large artery stroke	Olink	OID20135	Q9Y5X1	SNX9	Inverse variance weighted (fixed effects)	2	0.656529	0.22971	0.00426209	0.343613
Ischemic stroke	Olink	OID20720	O43291	SPINT2	Wald ratio	1	0.130145	0.0456556	0.00436403	0.346712
Cardioembolic stroke	Olink	OID20970	Q6UX15	LAYN	Inverse variance weighted (fixed effects)	2	-0.160243	0.0561972	0.00435226	0.346712
Ischemic stroke	Olink	OID30254	Q12841	FSTL1	Inverse variance weighted (fixed effects)	2	-0.13491	0.0474016	0.00442579	0.349586
Ischemic stroke	Olink	OID31043	O94830	DDHD2	Wald ratio	1	-0.216689	0.0762083	0.00446387	0.350568
Large artery stroke	SomaScan	17698_15	Q969T9	WBP2	Wald ratio	1	1.3007	0.458042	0.00451567	0.350606
Large artery stroke	SomaScan	3302_58	O76096	CST7	Inverse variance weighted (fixed effects)	3	0.15163	0.0533788	0.00450228	0.350606
Ischemic stroke	SomaScan	9580_5	Q13753	LAMC2	Inverse variance weighted (fixed effects)	3	0.0573568	0.020251	0.00462155	0.355368
Cardioembolic stroke	Olink	OID30115	Q8N8E3	CEP112	Inverse variance weighted (fixed effects)	2	0.193237	0.0682388	0.00462902	0.355368
Ischemic stroke	Olink	OID20208	P02462	COL4A1	Inverse variance weighted (fixed effects)	2	-0.119615	0.0422799	0.00466747	0.356318
Cardioembolic stroke	SomaScan	5005_4	P53778	MAPK12	Inverse variance weighted (fixed effects)	2	0.225149	0.0797084	0.00473306	0.357536
Large artery stroke	SomaScan	9839_148	P58753	TIRAP	Inverse variance weighted (fixed effects)	2	0.446328	0.158021	0.00473575	0.357536
Cardioembolic stroke	Olink	OID20236	Q16270	IGFBP7	Inverse variance weighted (fixed effects)	2	-0.143403	0.0508033	0.00476203	0.357545
Ischemic stroke	Olink	OID31028	Q9H6H4	REEP4	Wald ratio	1	0.125951	0.0447193	0.00485532	0.360586
Cardioembolic stroke	Olink	OID21310	O95498	VNN2	Inverse variance weighted (fixed effects)	3	-0.0794196	0.0281937	0.00484849	0.360586
Large artery stroke	SomaScan	10832_24	Q9UBX8	B4GALT6	Inverse variance weighted (fixed effects)	2	-0.166815	0.0593234	0.00492403	0.363713
Small vessel stroke	Olink	OID21458	P62166	NCS1	Wald ratio	1	-0.627617	0.22336	0.00495591	0.364099
Large artery stroke	Olink	OID21050	P04216	THY1	Inverse variance weighted (fixed effects)	2	0.266536	0.0949511	0.00499915	0.365312
Large artery stroke	Olink	OID20235	Q8NBP7	PCSK9	Inverse variance weighted (fixed effects)	2	0.393545	0.140288	0.00502761	0.365438
Ischemic stroke	SomaScan	3484_60	P01019	AGT	Inverse variance weighted (fixed effects)	2	0.107859	0.0386337	0.00524086	0.371069
Ischemic stroke	SomaScan	18884_22	Q9UDY4	DNAJB4	Inverse variance weighted (fixed effects)	2	0.116987	0.041898	0.00523531	0.371069
Ischemic stroke	SomaScan	5900_11	P49773	HINT1	Wald ratio	1	-0.236082	0.0845361	0.00522729	0.371069
Cardioembolic stroke	SomaScan	15566_10	P51911	CNN1	Wald ratio	1	-0.398511	0.142633	0.00520676	0.371069
Large artery stroke	Olink	OID30925	P63172	DYNLT1	Wald ratio	1	0.751099	0.268605	0.0051692	0.371069
Ischemic stroke	Olink	OID20483	P30048	PRDX3	Wald ratio	1	0.323706	0.116163	0.00532532	0.371601
Cardioembolic stroke	Olink	OID31291	Q68DV7	RNF43	Inverse variance weighted (fixed effects)	2	-0.399059	0.14307	0.00528295	0.371601
Cardioembolic stroke	SomaScan	15503_20	O00292	LEFTY2	Inverse variance weighted (fixed effects)	3	-0.0777777	0.0279937	0.00546272	0.371601
Large artery stroke	SomaScan	2993_1	O95256	IL18RAP	Wald ratio	1	-0.781595	0.280982	0.00540818	0.371601
Small vessel stroke	Olink	OID21489	P21741	MDK	Wald ratio	1	-0.890652	0.320585	0.00546593	0.371601
Small vessel stroke	Olink	OID20208	P02462	COL4A1	Inverse variance weighted (fixed effects)	2	-0.314198	0.112844	0.00536325	0.371601
Small vessel stroke	Olink	OID20765	O00626	CCL22	Inverse variance weighted (fixed effects)	2	0.423168	0.152255	0.00544703	0.371601
Small vessel stroke	Olink	OID21344	O43570	CA12	Inverse variance weighted (fixed effects)	2	-0.178851	0.0643725	0.00546305	0.371601
Ischemic stroke	Olink	OID31291	Q68DV7	RNF43	Inverse variance weighted (fixed effects)	2	-0.172707	0.0623252	0.00558727	0.374943
Large artery stroke	SomaScan	9329_28	Q86YW5	TREML1	Wald ratio	1	1.03301	0.372765	0.00558471	0.374943
Small vessel stroke	Olink	OID20746	Q96KG7	MEGF10	Inverse variance weighted (fixed effects)	2	0.155976	0.0562993	0.00559739	0.374943
Ischemic stroke	Olink	OID30101	Q96LB8	PGLYRP4	Inverse variance weighted (fixed effects)	2	-0.0508313	0.0183603	0.00563067	0.375332
Small vessel stroke	Olink	OID20385	P08887	IL6R	Inverse variance weighted (fixed effects)	3	-0.141044	0.0509939	0.00567651	0.376551
Ischemic stroke	Olink	OID20324	O75023	LILRB5	Inverse variance weighted (fixed effects)	4	0.0390939	0.0141667	0.00578774	0.377626
Ischemic stroke	Olink	OID21462	Q8WWY7	WFDC12	Inverse variance weighted (fixed effects)	2	-0.0497172	0.0180167	0.00578891	0.377626
Ischemic stroke	Olink	OID31047	P51649	ALDH5A1	Wald ratio	1	-0.136406	0.0494738	0.00583089	0.377626
Cardioembolic stroke	Olink	OID20882	Q9UPY6	WASF3	Inverse variance weighted (fixed effects)	2	0.304978	0.110552	0.00580335	0.377626
Cardioembolic stroke	Olink	OID21402	Q9NSA1	FGF21	Inverse variance weighted (fixed effects)	2	-0.406743	0.147242	0.00573751	0.377626
Large artery stroke	Olink	OID30675	P16442	ABO	Inverse variance weighted (fixed effects)	2	0.123036	0.0446834	0.00589597	0.378255
Large artery stroke	Olink	OID31462	Q6PL24	TMED8	Wald ratio	1	-0.898858	0.326308	0.00587586	0.378255
Cardioembolic stroke	Olink	OID21241	Q6P2H3	CEP85	Wald ratio	1	-0.596616	0.217075	0.00598818	0.381426
Cardioembolic stroke	SomaScan	3305_6	Q9NR61	DLL4	Wald ratio	1	0.825371	0.300384	0.00600122	0.381426
Cardioembolic stroke	SomaScan	12662_82	Q13011	ECH1	Wald ratio	1	-0.178205	0.0649844	0.00610165	0.384235
Large artery stroke	SomaScan	2602_2	O15123	ANGPT2	Wald ratio	1	-0.482416	0.175841	0.00607921	0.384235
Ischemic stroke	Olink	OID31126	Q13938	CAPS	Wald ratio	1	-0.178197	0.0650559	0.00616019	0.385383
Ischemic stroke	Olink	OID21050	P04216	THY1	Inverse variance weighted (fixed effects)	3	0.0655752	0.0239608	0.00620448	0.385383
Ischemic stroke	Olink	OID30650	O60279	SUSD5	Inverse variance weighted (fixed effects)	3	0.0619647	0.0226392	0.0061992	0.385383
Cardioembolic stroke	Olink	OID30320	O14960	LECT2	Inverse variance weighted (fixed effects)	3	0.114059	0.0417681	0.00631879	0.388947
Large artery stroke	Olink	OID30648	Q6FHJ7	SFRP4	Wald ratio	1	0.303068	0.110945	0.00630071	0.388947
Small vessel stroke	Olink	OID20748	P56470	LGALS4	Inverse variance weighted (fixed effects)	2	0.560269	0.205811	0.00648393	0.397323
Large artery stroke	SomaScan	4924_32	P03956	MMP1	Inverse variance weighted (fixed effects)	2	-0.128759	0.0473839	0.00658061	0.401447
Ischemic stroke	Olink	OID30569	Q8N556	AFAP1	Inverse variance weighted (fixed effects)	2	-0.0470947	0.0173648	0.00668628	0.404283
Ischemic stroke	SomaScan	12534_10	Q13137	CALCOCO2	Wald ratio	1	-0.224868	0.0828924	0.00667242	0.404283
Ischemic stroke	Olink	OID21195	O75493	CA11	Wald ratio	1	-0.303361	0.11197	0.00674249	0.405886
Ischemic stroke	Olink	OID30195	Q5JTV8	TOR1AIP1	Inverse variance weighted (fixed effects)	3	0.0403271	0.0148976	0.00679027	0.40697
Cardioembolic stroke	SomaScan	4152_58	P03952	KLKB1	Inverse variance weighted (fixed effects)	2	0.106761	0.0394832	0.00685172	0.408859
Small vessel stroke	Olink	OID21288	P34949	MPI	Wald ratio	1	-0.262434	0.0971608	0.00691249	0.410692
Small vessel stroke	Olink	OID20953	O43557	TNFSF14	Inverse variance weighted (fixed effects)	2	-0.215217	0.0797309	0.00694878	0.411061
Ischemic stroke	Olink	OID20559	Q9UDT6	CLIP2	Wald ratio	1	0.152032	0.056412	0.00703811	0.412772
Cardioembolic stroke	Olink	OID20986	Q9H477	RBKS	Inverse variance weighted (fixed effects)	2	-0.16076	0.0596458	0.00703371	0.412772
Cardioembolic stroke	SomaScan	18340_2	P28070	PSMB4	Inverse variance weighted (fixed effects)	2	0.142686	0.0530583	0.00716167	0.417636
Large artery stroke	Olink	OID20606	P42702	LIFR	Inverse variance weighted (fixed effects)	2	-0.3553	0.132299	0.00724027	0.417636
Large artery stroke	Olink	OID20204	Q9BQB4	SOST	Wald ratio	1	-0.997643	0.371254	0.00720485	0.417636
Large artery stroke	SomaScan	6899_37	Q9H0N5	PCBD2	Wald ratio	1	1.13718	0.423459	0.00724331	0.417636
Ischemic stroke	Olink	OID21319	P38936	CDKN1A	Wald ratio	1	0.144902	0.0541516	0.00745373	0.424013
Ischemic stroke	SomaScan	8480_29	Q12805	EFEMP1	Inverse variance weighted (fixed effects)	2	-0.146059	0.0546062	0.00747802	0.424013
Cardioembolic stroke	Olink	OID21454	O00292	LEFTY2	Inverse variance weighted (fixed effects)	3	-0.0913733	0.0341403	0.00744165	0.424013
Large artery stroke	Olink	OID21514	P09958	FURIN	Inverse variance weighted (fixed effects)	2	0.333404	0.124596	0.00745321	0.424013
Small vessel stroke	Olink	OID21260	Q9Y5L3	ENTPD2	Wald ratio	1	-0.633541	0.237072	0.00753209	0.425314
Ischemic stroke	SomaScan	15620_4	Q8N2Q7	NLGN1	Wald ratio	1	0.164291	0.0615154	0.00756861	0.425618
Large artery stroke	Olink	OID30250	P58107	EPPK1	Inverse variance weighted (fixed effects)	3	0.174783	0.0655053	0.0076252	0.427043
Cardioembolic stroke	SomaScan	5006_71	O15264	MAPK13	Wald ratio	1	-0.416955	0.156574	0.00774512	0.431342
Small vessel stroke	Olink	OID20280	P15085	CPA1	Wald ratio	1	0.305284	0.114677	0.00776511	0.431342
Large artery stroke	Olink	OID20318	Q14393	GAS6	Inverse variance weighted (fixed effects)	2	-0.235489	0.0885657	0.0078391	0.431941
Small vessel stroke	Olink	OID20606	P42702	LIFR	Inverse variance weighted (fixed effects)	2	-0.32231	0.121164	0.00781155	0.431941
Cardioembolic stroke	SomaScan	12656_1	Q07866	KLC1	Wald ratio	1	0.503386	0.189616	0.00793644	0.434261
Small vessel stroke	SomaScan	18878_15	O60565	GREM1	Inverse variance weighted (fixed effects)	3	0.105565	0.0397738	0.00795108	0.434261
Small vessel stroke	SomaScan	8053_16	Q8TBM8	DNAJB14	Wald ratio	1	-0.929678	0.350417	0.00797654	0.434261
Ischemic stroke	Olink	OID20386	P00441	SOD1	Wald ratio	1	-0.295477	0.111443	0.00801645	0.434702
Ischemic stroke	Olink	OID30141	A6NHS7	MANSC4	Inverse variance weighted (fixed effects)	3	-0.0427806	0.0161747	0.00817147	0.437477
Ischemic stroke	Olink	OID21218	Q8IWL1	SFTPA2	Inverse variance weighted (fixed effects)	3	-0.0442555	0.0167533	0.00825156	0.437477
Cardioembolic stroke	Olink	OID30597	Q8TDQ7	GNPDA2	Inverse variance weighted (fixed effects)	2	0.180172	0.0681701	0.008218	0.437477
Large artery stroke	Olink	OID20768	P36941	LTBR	Wald ratio	1	0.209202	0.0790534	0.00813676	0.437477
Large artery stroke	SomaScan	9244_27	P50897	PPT1	Wald ratio	1	-0.405972	0.153748	0.00827848	0.437477
Small vessel stroke	Olink	OID20684	P35625	TIMP3	Inverse variance weighted (fixed effects)	3	-0.144351	0.0546794	0.00829173	0.437477
Small vessel stroke	SomaScan	2816_50	P50895	BCAM	Inverse variance weighted (fixed effects)	3	0.279262	0.105607	0.00818484	0.437477
Small vessel stroke	Olink	OID21379	Q02742	GCNT1	Inverse variance weighted (fixed effects)	2	0.180752	0.0685172	0.00833841	0.438248
Cardioembolic stroke	SomaScan	5443_62	P01160	NPPA	Wald ratio	1	0.713629	0.271057	0.00846921	0.443417
Ischemic stroke	Olink	OID31205	O15264	MAPK13	Wald ratio	1	-0.353309	0.134594	0.0086649	0.451931
Cardioembolic stroke	Olink	OID21124	P00749	PLAU	Inverse variance weighted (fixed effects)	2	-0.483684	0.184621	0.0087963	0.452479
Cardioembolic stroke	Olink	OID30711	O95497	VNN1	Inverse variance weighted (fixed effects)	3	0.0981529	0.0375279	0.00891062	0.452479
Large artery stroke	Olink	OID20190	Q9Y286	SIGLEC7	Inverse variance weighted (fixed effects)	2	0.236665	0.0904886	0.00891214	0.452479
Large artery stroke	SomaScan	2742_68	Q9Y286	SIGLEC7	Inverse variance weighted (fixed effects)	3	0.246612	0.094256	0.008886	0.452479
Large artery stroke	SomaScan	3298_52	Q8IWV2	CNTN4	Inverse variance weighted (fixed effects)	3	0.22992	0.0876852	0.00873874	0.452479
Large artery stroke	SomaScan	2888_49	P10643	C7	Inverse variance weighted (fixed effects)	3	-0.105819	0.0404058	0.00882129	0.452479
Small vessel stroke	Olink	OID21153	Q6UXH9	PAMR1	Inverse variance weighted (fixed effects)	3	-0.117465	0.0449515	0.00897094	0.452479
Small vessel stroke	Olink	OID31104	Q5F1R6	DNAJC21	Wald ratio	1	-0.484406	0.185378	0.00897341	0.452479
Small vessel stroke	SomaScan	5722_78	P42785	PRCP	Inverse variance weighted (fixed effects)	2	0.303169	0.11583	0.00886149	0.452479
Ischemic stroke	Olink	OID21160	Q99497	PARK7	Wald ratio	1	-0.111234	0.0426715	0.00914083	0.452887
Ischemic stroke	SomaScan	13242_134	Q9BYB0	SHANK3	Inverse variance weighted (fixed effects)	2	0.0547471	0.0209698	0.00903402	0.452887
Ischemic stroke	SomaScan	4989_7	P02679	FGG	Wald ratio	1	-0.168081	0.0645161	0.00918037	0.452887
Ischemic stroke	SomaScan	13657_2	Q96T60	PNKP	Wald ratio	1	0.191658	0.0734856	0.00910442	0.452887
Ischemic stroke	SomaScan	19154_41	P07093	SERPINE2	Inverse variance weighted (fixed effects)	3	-0.0487432	0.0187095	0.00918018	0.452887
Large artery stroke	SomaScan	14153_8	P52797	EFNA3	Wald ratio	1	-1.19803	0.459519	0.00913013	0.452887
Ischemic stroke	Olink	OID30647	Q15276	RABEP1	Wald ratio	1	-0.259531	0.0998195	0.00932238	0.455264
Cardioembolic stroke	Olink	OID31358	P21695	GPD1	Wald ratio	1	-0.591026	0.227232	0.00929586	0.455264
Cardioembolic stroke	SomaScan	17490_4	Q9H299	SH3BGRL3	Inverse variance weighted (fixed effects)	2	-0.168321	0.0647689	0.00935534	0.455264
Cardioembolic stroke	SomaScan	6467_65	Q8NBL1	POGLUT1	Inverse variance weighted (fixed effects)	2	0.18882	0.0727176	0.00941448	0.455264
Small vessel stroke	Olink	OID21506	O95721	SNAP29	Wald ratio	1	-0.744428	0.286674	0.00941038	0.455264
Small vessel stroke	Olink	OID20537	Q96LC7	SIGLEC10	Inverse variance weighted (fixed effects)	2	-0.185525	0.0714627	0.00942844	0.455264
Ischemic stroke	Olink	OID30372	P30046	DDT	Wald ratio	1	-0.101659	0.0393988	0.00987297	0.456717
Ischemic stroke	Olink	OID20844	Q9HA65	TBC1D17	Inverse variance weighted (fixed effects)	2	-0.0651751	0.0253116	0.0100266	0.456717
Ischemic stroke	Olink	OID31084	Q96RU2	USP28	Inverse variance weighted (fixed effects)	2	-0.198489	0.0772675	0.0102034	0.456717
Ischemic stroke	SomaScan	11219_95	Q8TAT2	FGFBP3	Wald ratio	1	-0.078243	0.030199	0.00957228	0.456717
Ischemic stroke	SomaScan	9715_15	O75054	IGSF3	Inverse variance weighted (fixed effects)	2	-0.161538	0.0628258	0.0101346	0.456717
Cardioembolic stroke	Olink	OID30295	Q7Z7M9	GALNT5	Inverse variance weighted (fixed effects)	2	0.198448	0.0774933	0.0104419	0.456717
Cardioembolic stroke	Olink	OID20322	P10451	SPP1	Wald ratio	1	-0.465055	0.180417	0.0099469	0.456717
Cardioembolic stroke	Olink	OID21100	P05164	MPO	Wald ratio	1	0.217716	0.0849959	0.0104226	0.456717
Cardioembolic stroke	Olink	OID20492	Q9BXJ7	AMN	Inverse variance weighted (fixed effects)	4	-0.0742965	0.0289555	0.0102914	0.456717
Cardioembolic stroke	Olink	OID30293	Q96DC8	ECHDC3	Inverse variance weighted (fixed effects)	3	-0.146007	0.0566609	0.00997021	0.456717
Cardioembolic stroke	SomaScan	10815_2	Q5JVS0	HABP4	Inverse variance weighted (fixed effects)	2	-0.143075	0.0555724	0.0100364	0.456717
Cardioembolic stroke	SomaScan	13434_172	Q9NVD7	PARVA	Inverse variance weighted (fixed effects)	2	0.528807	0.204599	0.00974923	0.456717
Large artery stroke	Olink	OID20317	O15031	PLXNB2	Inverse variance weighted (fixed effects)	3	-0.1152	0.0448349	0.0101868	0.456717
Large artery stroke	Olink	OID31026	Q08378	GOLGA3	Wald ratio	1	0.627185	0.244611	0.0103469	0.456717
Large artery stroke	Olink	OID20109	Q13444	ADAM15	Inverse variance weighted (fixed effects)	3	0.122149	0.047591	0.0102692	0.456717
Large artery stroke	Olink	OID21071	P11215	ITGAM	Wald ratio	1	-0.35264	0.137511	0.0103341	0.456717
Large artery stroke	Olink	OID20447	Q5R372	RABGAP1L	Wald ratio	1	-0.737406	0.284537	0.00955299	0.456717
Large artery stroke	Olink	OID20408	P41222	PTGDS	Wald ratio	1	-1.02822	0.400034	0.0101602	0.456717
Large artery stroke	SomaScan	6629_3	P60022	DEFB1	Inverse variance weighted (fixed effects)	3	-0.151415	0.0585328	0.00968615	0.456717
Large artery stroke	SomaScan	12432_23	Q9HB71	CACYBP	Wald ratio	1	0.463761	0.181195	0.0104835	0.456717
Large artery stroke	SomaScan	16309_30	Q9UK85	DKKL1	Wald ratio	1	-1.08571	0.423529	0.0103625	0.456717
Small vessel stroke	Olink	OID21222	Q9UQQ2	SH2B3	Wald ratio	1	0.79189	0.306379	0.00974701	0.456717
Small vessel stroke	Olink	OID21416	P06756	ITGAV	Inverse variance weighted (fixed effects)	2	0.336413	0.130171	0.00975478	0.456717
Small vessel stroke	Olink	OID20529	Q6DN72	FCRL6	Wald ratio	1	-0.0843335	0.0328434	0.0102363	0.456717
Small vessel stroke	Olink	OID31484	Q96DE0	NUDT16	Wald ratio	1	0.406754	0.158682	0.0103674	0.456717
Small vessel stroke	SomaScan	4276_10	P30086	PEBP1	Inverse variance weighted (fixed effects)	3	-0.169896	0.0658405	0.00986809	0.456717
Small vessel stroke	SomaScan	11540_37	O43524	FOXO3	Wald ratio	1	0.995268	0.386435	0.0100092	0.456717
Small vessel stroke	SomaScan	15560_52	P20062	TCN2	Inverse variance weighted (fixed effects)	3	0.112068	0.0434664	0.00992955	0.456717
Small vessel stroke	SomaScan	17490_4	Q9H299	SH3BGRL3	Inverse variance weighted (fixed effects)	2	-0.20101	0.0783426	0.0102945	0.456717
Small vessel stroke	SomaScan	7009_8	P21854	CD72	Wald ratio	1	0.49735	0.194346	0.0104946	0.456717
Small vessel stroke	SomaScan	2911_27	P21741	MDK	Wald ratio	1	-0.838879	0.32662	0.010218	0.456717
Cardioembolic stroke	SomaScan	18343_10	Q9NUI1	DECR2	Inverse variance weighted (fixed effects)	3	0.132521	0.0518593	0.0106067	0.460127
Cardioembolic stroke	SomaScan	19223_6	P62820	RAB1A	Wald ratio	1	0.744646	0.291598	0.0106594	0.46095
Large artery stroke	Olink	OID21083	P08254	MMP3	Inverse variance weighted (fixed effects)	2	0.167414	0.0655993	0.0107084	0.461609
Large artery stroke	Olink	OID21251	Q6UX82	LYPD8	Inverse variance weighted (fixed effects)	3	0.249919	0.0980097	0.0107741	0.462983
Large artery stroke	SomaScan	8900_28	Q92859	NEO1	Wald ratio	1	-0.321031	0.125952	0.0108083	0.462994
Cardioembolic stroke	Olink	OID21374	P80511	S100A12	Inverse variance weighted (fixed effects)	2	0.194675	0.0764724	0.0109062	0.465101
Small vessel stroke	Olink	OID30660	O15335	CHAD	Inverse variance weighted (fixed effects)	2	-0.661351	0.259856	0.0109255	0.465101
Ischemic stroke	Olink	OID31066	Q92859	NEO1	Wald ratio	1	0.252686	0.0996756	0.0112419	0.465408
Ischemic stroke	SomaScan	15333_11	Q99470	SDF2	Wald ratio	1	0.099915	0.0395408	0.011508	0.465408
Ischemic stroke	SomaScan	16809_1	O00746	NME4	Wald ratio	1	0.129231	0.0510769	0.0114023	0.465408
Ischemic stroke	SomaScan	12656_1	Q07866	KLC1	Wald ratio	1	0.208804	0.0823928	0.0112689	0.465408
Ischemic stroke	SomaScan	10818_36	P17405	SMPD1	Inverse variance weighted (fixed effects)	3	0.0529132	0.020914	0.0114049	0.465408
Ischemic stroke	SomaScan	8360_169	O76036	NCR1	Wald ratio	1	0.0737649	0.0290999	0.0112485	0.465408
Cardioembolic stroke	Olink	OID21045	Q6NW40	RGMB	Inverse variance weighted (fixed effects)	2	-0.222304	0.0881189	0.0116435	0.465408
Cardioembolic stroke	Olink	OID21207	P07332	FES	Wald ratio	1	-0.317265	0.124801	0.0110167	0.465408
Cardioembolic stroke	SomaScan	9557_5	Q9H8J5	MANSC1	Wald ratio	1	0.161593	0.0640125	0.0115899	0.465408
Cardioembolic stroke	SomaScan	5852_6	P80511	S100A12	Inverse variance weighted (fixed effects)	2	0.213166	0.0839464	0.0111071	0.465408
Large artery stroke	Olink	OID20270	Q96AP7	ESAM	Wald ratio	1	-0.386322	0.153142	0.011648	0.465408
Large artery stroke	Olink	OID20946	O43155	FLRT2	Inverse variance weighted (fixed effects)	3	-0.139178	0.0549312	0.0112872	0.465408
Large artery stroke	Olink	OID31371	Q96IQ7	VSIG2	Wald ratio	1	0.287626	0.114018	0.011648	0.465408
Small vessel stroke	Olink	OID31371	Q96IQ7	VSIG2	Wald ratio	1	0.270265	0.10698	0.0115266	0.465408
Small vessel stroke	Olink	OID30338	Q9H3S4	TPK1	Inverse variance weighted (fixed effects)	3	-0.157943	0.0624465	0.0114303	0.465408
Small vessel stroke	Olink	OID20270	Q96AP7	ESAM	Wald ratio	1	-0.363004	0.143689	0.0115266	0.465408
Small vessel stroke	Olink	OID30728	Q9Y5Y7	LYVE1	Inverse variance weighted (fixed effects)	2	0.316812	0.125561	0.0116304	0.465408
Small vessel stroke	SomaScan	9313_27	P23435	CBLN1	Inverse variance weighted (fixed effects)	3	-0.299559	0.118249	0.0112996	0.465408
Small vessel stroke	SomaScan	13580_2	Q16222	UAP1	Wald ratio	1	-1.12869	0.44504	0.011208	0.465408
Small vessel stroke	SomaScan	8039_41	Q8N128	FAM177A1	Inverse variance weighted (fixed effects)	3	0.128754	0.0508669	0.0113673	0.465408
Small vessel stroke	SomaScan	6605_17	P35858	IGFALS	Inverse variance weighted (fixed effects)	2	-0.38404	0.152045	0.0115428	0.465408
Cardioembolic stroke	Olink	OID20763	Q16651	PRSS8	Wald ratio	1	-0.383705	0.152264	0.0117355	0.466178
Large artery stroke	Olink	OID20180	Q9GZM7	TINAGL1	Wald ratio	1	0.810968	0.321686	0.0117026	0.466178
Large artery stroke	SomaScan	4126_22	P17213	BPI	Inverse variance weighted (fixed effects)	3	-0.112091	0.0445454	0.0118584	0.469694
Ischemic stroke	Olink	OID21416	P06756	ITGAV	Inverse variance weighted (fixed effects)	2	0.118921	0.0473603	0.0120396	0.472333
Ischemic stroke	Olink	OID20192	O75791	GRAP2	Wald ratio	1	0.226605	0.0903317	0.0121214	0.472333
Ischemic stroke	SomaScan	16074_12	O75791	GRAP2	Wald ratio	1	0.487968	0.194519	0.0121214	0.472333
Ischemic stroke	SomaScan	16825_20	P54252	ATXN3	Inverse variance weighted (fixed effects)	3	0.0721433	0.0287627	0.012134	0.472333
Cardioembolic stroke	Olink	OID20387	O75015	FCGR3B	Inverse variance weighted (fixed effects)	2	-0.152318	0.0607751	0.0122015	0.472333
Cardioembolic stroke	SomaScan	5939_42	O43508	TNFSF12	Inverse variance weighted (fixed effects)	2	-0.124571	0.0496198	0.0120556	0.472333
Large artery stroke	Olink	OID30374	Q9NRR1	CYTL1	Inverse variance weighted (fixed effects)	2	-0.123857	0.0494042	0.0121754	0.472333
Small vessel stroke	Olink	OID20904	Q9Y6D9	MAD1L1	Wald ratio	1	0.470884	0.187874	0.0121973	0.472333
Ischemic stroke	Olink	OID31108	Q8TAT2	FGFBP3	Wald ratio	1	-0.0538512	0.0215405	0.0124193	0.47273
Ischemic stroke	Olink	OID20171	Q8NI22	MCFD2	Wald ratio	1	0.137415	0.0549662	0.0124193	0.47273
Cardioembolic stroke	Olink	OID30706	P02765	AHSG	Inverse variance weighted (fixed effects)	3	-0.110409	0.0441115	0.0123164	0.47273
Large artery stroke	Olink	OID20713	Q7KYR7	BTN2A1	Wald ratio	1	0.255642	0.102208	0.0123774	0.47273
Small vessel stroke	SomaScan	12357_41	O95721	SNAP29	Wald ratio	1	-0.669486	0.267794	0.0124193	0.47273
Small vessel stroke	SomaScan	13519_112	Q86VW2	ARHGEF25	Wald ratio	1	0.470686	0.188053	0.0123166	0.47273
Ischemic stroke	Olink	OID20256	P04275	VWF	Wald ratio	1	0.201968	0.0809923	0.012643	0.47594
Ischemic stroke	Olink	OID21128	P00352	ALDH1A1	Wald ratio	1	-0.220071	0.0882518	0.012643	0.47594
Ischemic stroke	SomaScan	11265_8	P00352	ALDH1A1	Wald ratio	1	-0.190338	0.0763285	0.012643	0.47594
Cardioembolic stroke	Olink	OID21072	P02749	APOH	Inverse variance weighted (fixed effects)	2	-0.102379	0.0410124	0.0125499	0.47594
Ischemic stroke	Olink	OID20713	Q7KYR7	BTN2A1	Inverse variance weighted (fixed effects)	2	0.0817214	0.0328362	0.012819	0.478904
Cardioembolic stroke	Olink	OID21183	Q9NRA1	PDGFC	Wald ratio	1	0.501809	0.2016	0.0128056	0.478904
Large artery stroke	SomaScan	2843_13	O43291	SPINT2	Inverse variance weighted (fixed effects)	2	-0.154995	0.0622836	0.0128268	0.478904
Large artery stroke	SomaScan	2827_23	P78423	CX3CL1	Wald ratio	1	0.953767	0.383562	0.0128968	0.480203
Cardioembolic stroke	Olink	OID20959	Q8WV92	MITD1	Wald ratio	1	0.552794	0.222708	0.0130595	0.481309
Cardioembolic stroke	SomaScan	11643_73	Q8TDB6	DTX3L	Wald ratio	1	-0.78626	0.316794	0.0130674	0.481309
Small vessel stroke	Olink	OID30671	P0DN86;P0DN86;P0DN86	CGB5;CGB8;CGB3	Wald ratio	1	0.947416	0.381575	0.0130315	0.481309
Small vessel stroke	SomaScan	12731_12	Q6IQ23	PLEKHA7	Inverse variance weighted (fixed effects)	3	0.139453	0.0561333	0.01298	0.481309
Cardioembolic stroke	Olink	OID31150	Q8IXM2	C17orf49	Wald ratio	1	-0.640061	0.258161	0.0131637	0.482103
Small vessel stroke	Olink	OID21115	Q9UKK9	NUDT5	Wald ratio	1	-0.842298	0.339846	0.0131948	0.482103
Small vessel stroke	SomaScan	5509_7	P01133	EGF	Wald ratio	1	-0.482309	0.1946	0.0131948	0.482103
Ischemic stroke	SomaScan	3796_79	Q9BY76	ANGPTL4	Wald ratio	1	0.244994	0.0991865	0.0135101	0.483534
Ischemic stroke	SomaScan	11351_233	Q9H9Q4	NHEJ1	Wald ratio	1	0.288809	0.116836	0.0134393	0.483534
Cardioembolic stroke	Olink	OID21526	Q92876	KLK6	Wald ratio	1	-0.236843	0.0957785	0.0134049	0.483534
Cardioembolic stroke	SomaScan	3045_72	P21246	PTN	Wald ratio	1	-0.207349	0.0839895	0.0135586	0.483534
Cardioembolic stroke	SomaScan	17769_28	Q8WW12	PCNP	Wald ratio	1	0.477941	0.193627	0.0135736	0.483534
Large artery stroke	Olink	OID30977	Q13002	GRIK2	Inverse variance weighted (fixed effects)	2	-0.216281	0.087614	0.0135657	0.483534
Large artery stroke	Olink	OID20131	Q9H7M9	VSIR	Inverse variance weighted (fixed effects)	2	-0.166679	0.0673267	0.0132986	0.483534
Small vessel stroke	Olink	OID31027	O75792	RNASEH2A	Wald ratio	1	-0.525398	0.212886	0.0135878	0.483534
Small vessel stroke	Olink	OID20463	Q96DB9	FXYD5	Wald ratio	1	0.174252	0.0704481	0.0133802	0.483534
Small vessel stroke	SomaScan	4721_54	Q07654	TFF3	Wald ratio	1	0.597185	0.241287	0.0133236	0.483534
Cardioembolic stroke	SomaScan	8269_327	Q6UWY0	ARSK	Wald ratio	1	0.498206	0.201948	0.0136248	0.483593
Ischemic stroke	Olink	OID20388	P10646	TFPI	Inverse variance weighted (fixed effects)	2	-0.0611478	0.0247978	0.0136688	0.483897
Ischemic stroke	Olink	OID30095	O95858	TSPAN15	Wald ratio	1	0.313492	0.127188	0.0137094	0.48408
Ischemic stroke	SomaScan	14006_36	Q14749	GNMT	Inverse variance weighted (fixed effects)	2	-0.0794791	0.0322946	0.0138525	0.485229
Large artery stroke	Olink	OID21249	Q9BSW2	CRACR2A	Inverse variance weighted (fixed effects)	2	-0.352633	0.143253	0.0138319	0.485229
Large artery stroke	SomaScan	18215_5	Q9NWX6	THG1L	Inverse variance weighted (fixed effects)	2	-0.141854	0.0576326	0.0138415	0.485229
Small vessel stroke	SomaScan	13992_12	P46459	NSF	Wald ratio	1	0.500426	0.203404	0.013884	0.485229
Large artery stroke	Olink	OID21396	Q15116	PDCD1	Inverse variance weighted (fixed effects)	3	-0.290545	0.118246	0.0140056	0.486988
Large artery stroke	SomaScan	4355_13	Q9UIK4	DAPK2	Wald ratio	1	0.201455	0.0819609	0.0139735	0.486988
Ischemic stroke	Olink	OID30249	Q13137	CALCOCO2	Wald ratio	1	0.308973	0.125976	0.0141816	0.490383
Large artery stroke	SomaScan	9253_52	P16442	ABO	Inverse variance weighted (fixed effects)	3	0.0878807	0.0358514	0.014236	0.490383
Large artery stroke	SomaScan	16781_2	Q8NFI3	ENGASE	Inverse variance weighted (fixed effects)	3	0.12427	0.0506952	0.0142336	0.490383
Small vessel stroke	SomaScan	13940_19	Q16666	IFI16	Wald ratio	1	0.686059	0.279912	0.0142468	0.490383
Cardioembolic stroke	SomaScan	5231_79	Q8NBP7	PCSK9	Inverse variance weighted (fixed effects)	2	0.227155	0.0927889	0.0143619	0.491867
Small vessel stroke	SomaScan	2602_2	O15123	ANGPT2	Wald ratio	1	-0.396789	0.16208	0.0143607	0.491867
Ischemic stroke	Olink	OID20649	P30203	CD6	Inverse variance weighted (fixed effects)	2	0.0393257	0.0160743	0.0144251	0.492796
Ischemic stroke	Olink	OID20846	Q9Y680	FKBP7	Wald ratio	1	0.26412	0.108163	0.0146118	0.495158
Ischemic stroke	Olink	OID31179	Q9H867	VCPKMT	Wald ratio	1	-0.289976	0.118817	0.0146658	0.495158
Large artery stroke	Olink	OID30195	Q5JTV8	TOR1AIP1	Inverse variance weighted (fixed effects)	3	0.111226	0.0455855	0.0146895	0.495158
Small vessel stroke	Olink	OID21507	Q14512	FGFBP1	Inverse variance weighted (fixed effects)	2	-0.404214	0.165553	0.0146225	0.495158
Small vessel stroke	Olink	OID30767	P05546	SERPIND1	Wald ratio	1	0.882277	0.361376	0.0146288	0.495158
Small vessel stroke	Olink	OID21443	Q2VWP7	PRTG	Inverse variance weighted (fixed effects)	3	-0.146804	0.0601802	0.0147116	0.495158
Ischemic stroke	Olink	OID30331	Q9BW04	C1orf116	Wald ratio	1	0.297663	0.122254	0.0149007	0.495422
Ischemic stroke	SomaScan	12436_84	P78417	GSTO1	Inverse variance weighted (fixed effects)	3	-0.0424476	0.0174222	0.0148339	0.495422
Ischemic stroke	SomaScan	17773_26	Q99747	NAPG	Wald ratio	1	-0.237964	0.0976616	0.0148253	0.495422
Cardioembolic stroke	SomaScan	13983_27	Q08257	CRYZ	Inverse variance weighted (fixed effects)	3	0.114029	0.0468244	0.0148813	0.495422
Small vessel stroke	Olink	OID21419	Q9H6B4	CLMP	Inverse variance weighted (fixed effects)	2	-0.167996	0.0689493	0.0148294	0.495422
Cardioembolic stroke	Olink	OID20530	P33241	LSP1	Wald ratio	1	-0.301588	0.123986	0.0149978	0.497439
Ischemic stroke	Olink	OID21442	Q16595	FXN	Wald ratio	1	0.223609	0.0919993	0.0150757	0.498812
Ischemic stroke	SomaScan	12411_60	P61244	MAX	Wald ratio	1	0.0986622	0.0406912	0.0153228	0.498814
Ischemic stroke	SomaScan	5400_52	P48357	LEPR	Inverse variance weighted (fixed effects)	3	-0.0392697	0.0161648	0.0151269	0.498814
Ischemic stroke	SomaScan	5620_13	P19021	PAM	Inverse variance weighted (fixed effects)	3	-0.0351438	0.0144861	0.0152645	0.498814
Cardioembolic stroke	Olink	OID31382	Q9UKM9	RALY	Wald ratio	1	-0.546705	0.225349	0.0152648	0.498814
Cardioembolic stroke	SomaScan	3481_87	Q9NQW7	XPNPEP1	Wald ratio	1	0.618056	0.25463	0.0152128	0.498814
Small vessel stroke	Olink	OID21479	Q96SM3	CPXM1	Inverse variance weighted (fixed effects)	3	0.169575	0.0699434	0.0153313	0.498814
Small vessel stroke	Olink	OID20897	P16444	DPEP1	Inverse variance weighted (fixed effects)	2	-0.150164	0.0618455	0.0151801	0.498814
Ischemic stroke	Olink	OID20810	P08758	ANXA5	Wald ratio	1	0.159337	0.0659619	0.01571	0.502892
Ischemic stroke	SomaScan	11192_168	Q9GZM7	TINAGL1	Wald ratio	1	0.281081	0.116216	0.0155802	0.502892
Ischemic stroke	SomaScan	16324_38	Q15399	TLR1	Wald ratio	1	-0.225597	0.0932755	0.0155802	0.502892
Cardioembolic stroke	SomaScan	13481_24	Q15560	TCEA2	Wald ratio	1	-0.324157	0.134205	0.0157186	0.502892
Cardioembolic stroke	SomaScan	3853_56	P40925	MDH1	Wald ratio	1	0.580132	0.239735	0.0155252	0.502892
Cardioembolic stroke	SomaScan	16853_5	Q9NWW6	NRK1	Wald ratio	1	0.255319	0.105738	0.015751	0.502892
Small vessel stroke	Olink	OID30596	Q9H939	PSTPIP2	Wald ratio	1	-0.317493	0.131331	0.0156272	0.502892
Small vessel stroke	Olink	OID31375	Q9BU02	THTPA	Inverse variance weighted (fixed effects)	2	-0.182588	0.0755388	0.0156428	0.502892
Cardioembolic stroke	Olink	OID20967	O00220	TNFRSF10A	Inverse variance weighted (fixed effects)	3	-0.10944	0.0454476	0.0160377	0.509798
Cardioembolic stroke	SomaScan	17698_15	Q969T9	WBP2	Wald ratio	1	0.846154	0.351399	0.0160419	0.509798
Large artery stroke	Olink	OID20728	Q8WXD2	SCG3	Inverse variance weighted (fixed effects)	3	0.107757	0.0448331	0.0162383	0.513642
Large artery stroke	SomaScan	9580_5	Q13753	LAMC2	Inverse variance weighted (fixed effects)	3	0.151756	0.0631613	0.0162757	0.513642
Small vessel stroke	Olink	OID21027	Q96CD2	PPCDC	Inverse variance weighted (fixed effects)	2	0.144031	0.0599463	0.0162756	0.513642
Ischemic stroke	SomaScan	3050_7	P04275	VWF	Wald ratio	1	0.159236	0.066424	0.0165182	0.51803
Ischemic stroke	SomaScan	15495_9	P41439	FOLR3	Inverse variance weighted (fixed effects)	3	0.0361112	0.0150649	0.0165284	0.51803
Small vessel stroke	SomaScan	8794_13	P16444	DPEP1	Inverse variance weighted (fixed effects)	4	-0.134665	0.056143	0.0164575	0.51803
Cardioembolic stroke	SomaScan	3331_8	Q6NW40	RGMB	Inverse variance weighted (fixed effects)	2	-0.253046	0.105613	0.016576	0.518333
Ischemic stroke	Olink	OID21336	Q9BSL1	UBAC1	Wald ratio	1	-0.257886	0.107773	0.0167177	0.518775
Ischemic stroke	SomaScan	4468_21	Q9NRA0	SPHK2	Wald ratio	1	-0.283099	0.11831	0.0167177	0.518775
Cardioembolic stroke	Olink	OID30060	Q9NZJ5	EIF2AK3	Wald ratio	1	-0.337105	0.140805	0.0166604	0.518775
Cardioembolic stroke	SomaScan	5727_35	Q6Y288	B3GALTL	Inverse variance weighted (fixed effects)	2	-0.162045	0.0677362	0.0167437	0.518775
Large artery stroke	Olink	OID21463	O15123	ANGPT2	Inverse variance weighted (fixed effects)	2	-0.265786	0.111138	0.01678	0.518775
Ischemic stroke	Olink	OID30927	Q14184	DOC2B	Wald ratio	1	-0.330187	0.138321	0.016982	0.522215
Ischemic stroke	SomaScan	10772_21	Q8N6G5	CSGALNACT2	Wald ratio	1	-0.166376	0.0696864	0.0169634	0.522215
Small vessel stroke	SomaScan	18401_18	Q96Q83	ALKBH3	Inverse variance weighted (fixed effects)	2	0.202023	0.0846497	0.0170059	0.522215
Large artery stroke	SomaScan	14636_25	P52758	HRSP12	Inverse variance weighted (fixed effects)	2	0.199046	0.0834856	0.0171166	0.524436
Large artery stroke	Olink	OID20307	Q12860	CNTN1	Inverse variance weighted (fixed effects)	3	0.239316	0.100498	0.0172523	0.527411
Ischemic stroke	SomaScan	10419_1	Q6ZMJ2	SCARA5	Inverse variance weighted (fixed effects)	3	-0.0632945	0.0266064	0.0173632	0.528438
Large artery stroke	SomaScan	5728_60	Q96LA6	FCRL1	Inverse variance weighted (fixed effects)	2	0.158146	0.0664745	0.0173573	0.528438
Large artery stroke	Olink	OID30729	O00391	QSOX1	Inverse variance weighted (fixed effects)	2	-0.11541	0.0485961	0.0175546	0.533073
Cardioembolic stroke	SomaScan	8225_86	P29323	EPHB2	Inverse variance weighted (fixed effects)	2	-0.141284	0.059566	0.0176971	0.535025
Large artery stroke	Olink	OID20496	Q13291	SLAMF1	Inverse variance weighted (fixed effects)	2	-0.461919	0.194732	0.0176885	0.535025
Ischemic stroke	Olink	OID21157	O76061	STC2	Wald ratio	1	-0.28071	0.118424	0.0177703	0.535338
Large artery stroke	Olink	OID20079	P62736	ACTA2	Wald ratio	1	0.82208	0.347101	0.0178642	0.535338
Small vessel stroke	Olink	OID30732	P10909	CLU	Wald ratio	1	-0.503233	0.212335	0.0177881	0.535338
Small vessel stroke	SomaScan	13416_8	Q14C87	TMEM132D	Inverse variance weighted (fixed effects)	4	0.151842	0.0641048	0.0178533	0.535338
Cardioembolic stroke	Olink	OID31205	O15264	MAPK13	Wald ratio	1	-0.662263	0.279894	0.0179756	0.536325
Large artery stroke	Olink	OID20066	P34947	GRK5	Wald ratio	1	-0.196371	0.0829666	0.0179395	0.536325
Ischemic stroke	SomaScan	19238_12	P15104	GLUL	Wald ratio	1	0.337838	0.142857	0.0180367	0.536973
Ischemic stroke	Olink	OID31069	Q16625	OCLN	Wald ratio	1	-0.131234	0.0560015	0.0191091	0.538736
Ischemic stroke	Olink	OID20753	Q9NQ76	MEPE	Inverse variance weighted (fixed effects)	2	-0.115432	0.0492993	0.0192091	0.538736
Ischemic stroke	Olink	OID20585	Q9NRM6	IL17RB	Inverse variance weighted (fixed effects)	3	-0.0436362	0.0184788	0.018205	0.538736
Ischemic stroke	Olink	OID21289	Q6UXD5	SEZ6L2	Inverse variance weighted (fixed effects)	2	-0.108678	0.0464176	0.0192156	0.538736
Ischemic stroke	Olink	OID21204	Q7Z434	MAVS	Wald ratio	1	-0.197166	0.0841832	0.0191753	0.538736
Ischemic stroke	Olink	OID31153	Q8TF65	GIPC2	Wald ratio	1	0.064993	0.0277176	0.0190359	0.538736
Ischemic stroke	Olink	OID20882	Q9UPY6	WASF3	Inverse variance weighted (fixed effects)	2	0.112424	0.047994	0.0191569	0.538736
Ischemic stroke	Olink	OID21156	P04118	CLPS	Inverse variance weighted (fixed effects)	2	0.0424021	0.0181257	0.019318	0.538736
Ischemic stroke	Olink	OID20393	P20023	CR2	Inverse variance weighted (fixed effects)	2	-0.0856129	0.0365963	0.0193154	0.538736
Ischemic stroke	Olink	OID31477	Q9UH65	SWAP70	Inverse variance weighted (fixed effects)	3	-0.0990005	0.0419413	0.0182525	0.538736
Ischemic stroke	SomaScan	15483_377	O00468	AGRN	Inverse variance weighted (fixed effects)	2	-0.0791904	0.0338217	0.0192111	0.538736
Ischemic stroke	SomaScan	10815_2	Q5JVS0	HABP4	Inverse variance weighted (fixed effects)	2	-0.0568171	0.0242131	0.0189485	0.538736
Cardioembolic stroke	Olink	OID20398	P17936	IGFBP3	Inverse variance weighted (fixed effects)	3	-0.108331	0.046159	0.0189297	0.538736
Cardioembolic stroke	Olink	OID21120	Q5T2D2	TREML2	Inverse variance weighted (fixed effects)	3	-0.129282	0.0548945	0.018518	0.538736
Cardioembolic stroke	Olink	OID31086	O15269	SPTLC1	Wald ratio	1	-0.221258	0.0942798	0.0189344	0.538736
Cardioembolic stroke	SomaScan	2982_82	P56470	LGALS4	Wald ratio	1	-0.727955	0.309568	0.0186971	0.538736
Cardioembolic stroke	SomaScan	9241_40	Q9P1W8	SIRPG	Wald ratio	1	-0.257596	0.109643	0.0188038	0.538736
Large artery stroke	Olink	OID31138	P11137	MAP2	Wald ratio	1	0.666287	0.282105	0.0181844	0.538736
Large artery stroke	Olink	OID30483	Q9GZN4	PRSS22	Wald ratio	1	-0.220636	0.0939531	0.0188563	0.538736
Large artery stroke	Olink	OID30329	Q9BXD5	NPL	Wald ratio	1	0.272167	0.11587	0.0188295	0.538736
Large artery stroke	Olink	OID20974	O60242	ADGRB3	Inverse variance weighted (fixed effects)	3	-0.105021	0.0448736	0.019264	0.538736
Large artery stroke	Olink	OID31442	P19525	EIF2AK2	Wald ratio	1	-0.346322	0.147086	0.0185454	0.538736
Large artery stroke	SomaScan	19262_219	P49748	ACADVL	Wald ratio	1	-1.16598	0.495851	0.0186997	0.538736
Large artery stroke	SomaScan	17377_1	P42330	AKR1C3	Inverse variance weighted (fixed effects)	3	0.282394	0.119836	0.0184477	0.538736
Large artery stroke	SomaScan	7957_2	Q8WXD2	SCG3	Wald ratio	1	0.13705	0.0581964	0.0185246	0.538736
Small vessel stroke	Olink	OID30597	Q8TDQ7	GNPDA2	Inverse variance weighted (fixed effects)	2	0.199402	0.0851413	0.0191799	0.538736
Small vessel stroke	Olink	OID31032	Q6UWW0	LCN15	Inverse variance weighted (fixed effects)	2	0.11735	0.0497971	0.0184453	0.538736
Small vessel stroke	Olink	OID20689	Q6UWV6	ENPP7	Inverse variance weighted (fixed effects)	3	-0.137095	0.0582517	0.0185978	0.538736
Small vessel stroke	SomaScan	19635_69	Q14314	FGL2	Wald ratio	1	-0.873082	0.372385	0.0190491	0.538736
Small vessel stroke	SomaScan	14012_17	Q96C10	DHX58	Inverse variance weighted (fixed effects)	2	-0.274561	0.116474	0.0184098	0.538736
Small vessel stroke	SomaScan	9713_67	Q15198	PDGFRL	Inverse variance weighted (fixed effects)	3	-0.174678	0.0745755	0.0191657	0.538736
Ischemic stroke	SomaScan	9329_28	Q86YW5	TREML1	Wald ratio	1	0.324622	0.138927	0.0194582	0.540441
Large artery stroke	Olink	OID31439	Q9Y3L3	SH3BP1	Inverse variance weighted (fixed effects)	2	-0.268157	0.114741	0.0194358	0.540441
Ischemic stroke	SomaScan	6470_19	P23142	FBLN1	Inverse variance weighted (fixed effects)	2	0.10252	0.0439273	0.0196038	0.541183
Large artery stroke	Olink	OID21404	P30041	PRDX6	Wald ratio	1	-0.369072	0.158091	0.0195672	0.541183
Small vessel stroke	SomaScan	16558_2	Q99972	MYOC	Inverse variance weighted (fixed effects)	2	0.183163	0.0784784	0.0195995	0.541183
Ischemic stroke	SomaScan	18899_82	Q9Y3E1	HDGFRP3	Wald ratio	1	-0.175676	0.0754505	0.0198931	0.541771
Ischemic stroke	SomaScan	12432_23	Q9HB71	CACYBP	Wald ratio	1	0.128795	0.0553379	0.0199422	0.541771
Cardioembolic stroke	SomaScan	15653_9	Q03692	COL10A1	Inverse variance weighted (fixed effects)	2	-0.160632	0.0690169	0.0199423	0.541771
Cardioembolic stroke	SomaScan	16324_38	Q15399	TLR1	Wald ratio	1	-0.462039	0.19812	0.0196945	0.541771
Small vessel stroke	Olink	OID30942	Q9UNY4	TTF2	Inverse variance weighted (fixed effects)	2	0.1394	0.0598671	0.019886	0.541771
Small vessel stroke	Olink	OID21194	P50749	RASSF2	Inverse variance weighted (fixed effects)	2	-0.45709	0.196372	0.0199293	0.541771
Small vessel stroke	Olink	OID20285	Q9H1U4	MEGF9	Inverse variance weighted (fixed effects)	2	-0.152166	0.0653449	0.0198773	0.541771
Small vessel stroke	SomaScan	11288_26	P49902	NT5C2	Inverse variance weighted (fixed effects)	2	0.378026	0.162133	0.0197229	0.541771
Ischemic stroke	Olink	OID31320	Q495A1	TIGIT	Wald ratio	1	0.195456	0.0840673	0.020072	0.542062
Ischemic stroke	SomaScan	2780_35	P02788	LTF	Inverse variance weighted (fixed effects)	2	0.115846	0.049797	0.019999	0.542062
Large artery stroke	Olink	OID31468	Q02750	MAP2K1	Wald ratio	1	-0.969329	0.416867	0.0200576	0.542062
Ischemic stroke	Olink	OID31285	O43903	GAS2	Wald ratio	1	0.164364	0.0708166	0.0202875	0.544361
Ischemic stroke	Olink	OID30359	P07093	SERPINE2	Inverse variance weighted (fixed effects)	3	-0.0452802	0.0195197	0.0203563	0.544361
Cardioembolic stroke	Olink	OID21137	Q8TDQ0	HAVCR2	Wald ratio	1	-0.399633	0.172225	0.0203185	0.544361
Large artery stroke	Olink	OID21531	Q16674	MIA	Inverse variance weighted (fixed effects)	3	0.100499	0.043309	0.0203135	0.544361
Small vessel stroke	SomaScan	7841_84	Q96AP7	ESAM	Inverse variance weighted (fixed effects)	3	-0.227215	0.0979427	0.0203475	0.544361
Cardioembolic stroke	Olink	OID31374	O60749	SNX2	Wald ratio	1	0.387375	0.167228	0.0205334	0.546218
Cardioembolic stroke	SomaScan	19130_81	P50452	SERPINB8	Inverse variance weighted (fixed effects)	2	-0.185805	0.0802439	0.0205856	0.546218
Large artery stroke	SomaScan	17675_17	Q9NPJ3	ACOT13	Wald ratio	1	-1.01209	0.43696	0.020547	0.546218
Small vessel stroke	Olink	OID20583	P50995	ANXA11	Wald ratio	1	-0.716791	0.309352	0.0204997	0.546218
Large artery stroke	Olink	OID20954	P48740	MASP1	Inverse variance weighted (fixed effects)	2	-0.234748	0.101446	0.0206664	0.54624
Small vessel stroke	Olink	OID31014	P29536	LMOD1	Wald ratio	1	-0.256128	0.11066	0.0206374	0.54624
Large artery stroke	SomaScan	10440_26	Q9H6B4	CLMP	Inverse variance weighted (fixed effects)	2	-0.244096	0.105549	0.0207424	0.547191
Ischemic stroke	Olink	OID20181	Q8WVQ1	CANT1	Wald ratio	1	-0.124414	0.053851	0.0208691	0.549472
Large artery stroke	SomaScan	4534_10	Q9GZN4	PRSS22	Wald ratio	1	-0.23527	0.101964	0.0210338	0.552744
Large artery stroke	SomaScan	4920_10	P61626	LYZ	Inverse variance weighted (fixed effects)	3	-0.146651	0.0636054	0.0211305	0.553158
Small vessel stroke	Olink	OID20974	O60242	ADGRB3	Inverse variance weighted (fixed effects)	3	0.0794093	0.0344405	0.0211278	0.553158
Ischemic stroke	SomaScan	17377_1	P42330	AKR1C3	Inverse variance weighted (fixed effects)	3	0.0958607	0.0415947	0.021187	0.553182
Small vessel stroke	SomaScan	2797_56	P04114	APOB	Wald ratio	1	0.693364	0.300915	0.0212124	0.553182
Cardioembolic stroke	SomaScan	8900_28	Q92859	NEO1	Wald ratio	1	0.218512	0.0949033	0.0213087	0.553791
Large artery stroke	Olink	OID30423	Q7Z698	SPRED2	Wald ratio	1	-0.683695	0.296958	0.0213168	0.553791
Small vessel stroke	Olink	OID20236	Q16270	IGFBP7	Inverse variance weighted (fixed effects)	2	-0.145061	0.0630305	0.0213668	0.554037
Small vessel stroke	Olink	OID30781	P05160	F13B	Wald ratio	1	0.165521	0.0719785	0.0214712	0.555688
Ischemic stroke	Olink	OID21429	Q96JA1	LRIG1	Inverse variance weighted (fixed effects)	3	-0.0389937	0.0169753	0.0216142	0.5563
Ischemic stroke	Olink	OID20141	P21980	TGM2	Wald ratio	1	-0.100449	0.0437249	0.0216018	0.5563
Ischemic stroke	Olink	OID31417	P61812	TGFB2	Wald ratio	1	0.122567	0.0534006	0.0217195	0.5563
Ischemic stroke	SomaScan	18891_98	P32456	GBP2	Wald ratio	1	-0.22328	0.0973545	0.0218205	0.5563
Ischemic stroke	SomaScan	8773_172	Q9NT22	EMILIN3	Inverse variance weighted (fixed effects)	2	-0.0603883	0.0263214	0.0217751	0.5563
Ischemic stroke	SomaScan	5478_50	Q04609	FOLH1	Wald ratio	1	-0.102832	0.0448172	0.021763	0.5563
Cardioembolic stroke	Olink	OID20565	Q01151	CD83	Wald ratio	1	-0.222939	0.0971915	0.0218012	0.5563
Small vessel stroke	Olink	OID21480	Q7Z4W1	DCXR	Wald ratio	1	-0.588109	0.256073	0.0216387	0.5563
Large artery stroke	SomaScan	17765_3	O95149	SNUPN	Wald ratio	1	0.43318	0.18894	0.0218663	0.556429
Large artery stroke	Olink	OID30264	P07492	GRP	Inverse variance weighted (fixed effects)	2	0.138749	0.0606407	0.0221341	0.562198
Cardioembolic stroke	Olink	OID31497	P53990	IST1	Wald ratio	1	-0.503637	0.220244	0.0222118	0.563126
Large artery stroke	Olink	OID21153	Q6UXH9	PAMR1	Inverse variance weighted (fixed effects)	3	-0.109643	0.0479645	0.0222586	0.563265
Large artery stroke	SomaScan	15452_5	P21589	NT5E	Inverse variance weighted (fixed effects)	2	0.128471	0.0562336	0.022337	0.563361
Small vessel stroke	Olink	OID30072	P04141	CSF2	Inverse variance weighted (fixed effects)	2	-0.226589	0.0991873	0.0223448	0.563361
Large artery stroke	SomaScan	13112_179	Q12841	FSTL1	Inverse variance weighted (fixed effects)	2	-0.332195	0.145555	0.022474	0.563977
Large artery stroke	SomaScan	11390_24	P35219	CA8	Inverse variance weighted (fixed effects)	2	-0.140121	0.0613832	0.0224466	0.563977
Small vessel stroke	SomaScan	12436_84	P78417	GSTO1	Inverse variance weighted (fixed effects)	3	-0.115818	0.0507541	0.022493	0.563977
Ischemic stroke	Olink	OID20345	Q6EMK4	VASN	Inverse variance weighted (fixed effects)	2	-0.0474577	0.020877	0.0230134	0.568258
Ischemic stroke	Olink	OID21196	P43628	KIR2DL3	Inverse variance weighted (fixed effects)	4	-0.0899871	0.039718	0.0234726	0.568258
Ischemic stroke	SomaScan	5139_32	O95185	UNC5C	Inverse variance weighted (fixed effects)	2	0.0932832	0.0411189	0.0232914	0.568258
Ischemic stroke	SomaScan	19266_35	Q13283	G3BP1	Wald ratio	1	-0.263386	0.115774	0.0229059	0.568258
Cardioembolic stroke	Olink	OID30407	Q04721	NOTCH2	Wald ratio	1	-0.330549	0.145813	0.0233944	0.568258
Cardioembolic stroke	Olink	OID21490	Q96NY8	NECTIN4	Wald ratio	1	0.131954	0.0581493	0.0232543	0.568258
Cardioembolic stroke	Olink	OID20630	P50452	SERPINB8	Inverse variance weighted (fixed effects)	2	-0.0573638	0.0253231	0.0234955	0.568258
Cardioembolic stroke	Olink	OID20985	Q07011	TNFRSF9	Wald ratio	1	0.240699	0.105949	0.0230959	0.568258
Cardioembolic stroke	SomaScan	3440_7	P12544	GZMA	Inverse variance weighted (fixed effects)	2	-0.331971	0.14648	0.0234314	0.568258
Cardioembolic stroke	SomaScan	11288_26	P49902	NT5C2	Inverse variance weighted (fixed effects)	2	0.301457	0.132958	0.0233716	0.568258
Cardioembolic stroke	SomaScan	3024_18	P08697	SERPINF2	Inverse variance weighted (fixed effects)	2	-0.302404	0.133485	0.0234849	0.568258
Large artery stroke	Olink	OID31507	Q8TF64	GIPC3	Wald ratio	1	0.221692	0.0976088	0.0231333	0.568258
Large artery stroke	Olink	OID20172	Q96LA6	FCRL1	Wald ratio	1	0.169812	0.0749588	0.023488	0.568258
Large artery stroke	SomaScan	6556_5	Q9UJA9	ENPP5	Inverse variance weighted (fixed effects)	4	-0.136098	0.0598732	0.0230204	0.568258
Large artery stroke	SomaScan	17726_3	Q9NR31	SAR1A	Wald ratio	1	0.322215	0.141428	0.0227086	0.568258
Large artery stroke	SomaScan	15503_20	O00292	LEFTY2	Inverse variance weighted (fixed effects)	3	-0.086466	0.0380331	0.0229996	0.568258
Large artery stroke	SomaScan	13114_50	P51884	LUM	Inverse variance weighted (fixed effects)	3	-0.359692	0.15826	0.0230385	0.568258
Small vessel stroke	Olink	OID30787	P02751	FN1	Wald ratio	1	-0.119805	0.0528762	0.0234657	0.568258
Small vessel stroke	SomaScan	14123_34	Q9H7M9	C10orf54	Inverse variance weighted (fixed effects)	3	-0.136313	0.0600223	0.0231442	0.568258
Small vessel stroke	SomaScan	7266_4	Q86WD7	SERPINA9	Inverse variance weighted (fixed effects)	2	-0.269209	0.118557	0.0231646	0.568258
Ischemic stroke	SomaScan	16302_11	Q96DR5	BPIFA2	Wald ratio	1	0.21224	0.09375	0.0235809	0.568313
Cardioembolic stroke	Olink	OID21119	Q8N6Q3	CD177	Inverse variance weighted (fixed effects)	3	0.126495	0.0558616	0.0235475	0.568313
Ischemic stroke	Olink	OID30706	P02765	AHSG	Inverse variance weighted (fixed effects)	3	-0.0396645	0.0175262	0.0236261	0.5684
Large artery stroke	Olink	OID21306	P05937	CALB1	Wald ratio	1	0.792501	0.350326	0.023686	0.568838
Ischemic stroke	Olink	OID20296	P08236	GUSB	Inverse variance weighted (fixed effects)	2	-0.114008	0.0506143	0.0242922	0.570967
Ischemic stroke	Olink	OID21091	Q9HCN6	GP6	Wald ratio	1	0.0581296	0.0258076	0.0242953	0.570967
Ischemic stroke	Olink	OID20140	Q13043	STK4	Wald ratio	1	-0.301024	0.133579	0.0242263	0.570967
Ischemic stroke	SomaScan	10391_1	Q9Y5C1	ANGPTL3	Inverse variance weighted (fixed effects)	2	-0.0585041	0.0259787	0.0243221	0.570967
Ischemic stroke	SomaScan	3327_27	Q9HB63	NTN4	Inverse variance weighted (fixed effects)	3	-0.073856	0.0327004	0.0239107	0.570967
Cardioembolic stroke	Olink	OID30389	P02818	BGLAP	Inverse variance weighted (fixed effects)	2	-0.334908	0.148304	0.0239301	0.570967
Cardioembolic stroke	SomaScan	9931_20	P04264	KRT1	Wald ratio	1	-0.722585	0.320496	0.0241595	0.570967
Cardioembolic stroke	SomaScan	17341_89	Q9BWD1	ACAT2	Inverse variance weighted (fixed effects)	2	-0.133462	0.0592682	0.0243323	0.570967
Large artery stroke	Olink	OID20108	Q9NWQ8	PAG1	Wald ratio	1	0.650256	0.28843	0.024167	0.570967
Large artery stroke	Olink	OID21498	P21589	NT5E	Inverse variance weighted (fixed effects)	3	0.140048	0.0622044	0.0243596	0.570967
Large artery stroke	SomaScan	3074_6	P18428	LBP	Inverse variance weighted (fixed effects)	3	-0.0985385	0.0436441	0.0239599	0.570967
Large artery stroke	SomaScan	4154_57	P16109	SELP	Inverse variance weighted (fixed effects)	3	0.203123	0.0900852	0.0241464	0.570967
Small vessel stroke	Olink	OID30194	Q8ND90	PNMA1	Wald ratio	1	-0.650475	0.288849	0.024325	0.570967
Small vessel stroke	Olink	OID21528	P13688	CEACAM1	Wald ratio	1	-0.157089	0.0696333	0.0240736	0.570967
Small vessel stroke	SomaScan	10833_64	Q96QV1	HHIP	Inverse variance weighted (fixed effects)	2	0.330735	0.146946	0.0244035	0.571017
Large artery stroke	Olink	OID20976	P78423	CX3CL1	Wald ratio	1	0.238481	0.106044	0.0245196	0.571779
Small vessel stroke	SomaScan	5621_64	Q9NS62	THSD1	Inverse variance weighted (fixed effects)	3	0.140153	0.0623212	0.0245198	0.571779
Cardioembolic stroke	Olink	OID20371	Q07654	TFF3	Inverse variance weighted (fixed effects)	2	-0.240404	0.10699	0.0246411	0.572654
Large artery stroke	Olink	OID20266	P48304	REG1B	Inverse variance weighted (fixed effects)	3	-0.132496	0.0589618	0.0246303	0.572654
Ischemic stroke	SomaScan	4159_130	P08603	CFH	Inverse variance weighted (fixed effects)	2	-0.0737806	0.0329242	0.0250308	0.576357
Large artery stroke	Olink	OID21298	Q9UJ71	CD207	Inverse variance weighted (fixed effects)	2	-0.134595	0.0600715	0.0250535	0.576357
Large artery stroke	SomaScan	12408_333	Q9UL26	RAB22A	Wald ratio	1	0.816358	0.364198	0.0249921	0.576357
Large artery stroke	SomaScan	5457_5	Q5KU26	COLEC12	Inverse variance weighted (fixed effects)	2	0.353747	0.157732	0.0249158	0.576357
Small vessel stroke	Olink	OID30889	Q8IY33	MICALL2	Wald ratio	1	0.69642	0.310487	0.0248974	0.576357
Small vessel stroke	SomaScan	9870_17	P23381	WARS	Inverse variance weighted (fixed effects)	2	0.196651	0.0877318	0.0249934	0.576357
Ischemic stroke	Olink	OID20452	P19801	AOC1	Inverse variance weighted (fixed effects)	2	-0.0586316	0.0261937	0.0251957	0.577709
Cardioembolic stroke	SomaScan	9201_13	P37802	TAGLN2	Wald ratio	1	0.414871	0.185345	0.0251968	0.577709
Small vessel stroke	Olink	OID31084	Q96RU2	USP28	Inverse variance weighted (fixed effects)	2	-0.497353	0.222449	0.0253642	0.580572
Ischemic stroke	Olink	OID20438	Q6UXK5	LRRN1	Inverse variance weighted (fixed effects)	3	-0.0264344	0.0118346	0.0255051	0.581937
Small vessel stroke	Olink	OID20342	P05121	SERPINE1	Wald ratio	1	-0.458499	0.205273	0.025509	0.581937
Ischemic stroke	SomaScan	4131_72	P02751	FN1	Wald ratio	1	-0.103977	0.0465909	0.0256343	0.582018
Cardioembolic stroke	Olink	OID30638	O96007	MOCS2	Inverse variance weighted (fixed effects)	2	0.119334	0.0535009	0.0257136	0.582018
Large artery stroke	Olink	OID21472	P20138	CD33	Inverse variance weighted (fixed effects)	3	0.143181	0.0642049	0.0257433	0.582018
Large artery stroke	Olink	OID20490	P12034	FGF5	Inverse variance weighted (fixed effects)	2	0.178976	0.0802926	0.0258107	0.582018
Large artery stroke	SomaScan	18214_2	P48507	GCLM	Inverse variance weighted (fixed effects)	2	0.458851	0.205575	0.0256125	0.582018
Large artery stroke	SomaScan	14088_38	P24592	IGFBP6	Wald ratio	1	-0.722915	0.324065	0.0256964	0.582018
Large artery stroke	SomaScan	3519_3	Q92583	CCL17	Inverse variance weighted (fixed effects)	2	0.196609	0.0882033	0.0258107	0.582018
Ischemic stroke	Olink	OID20307	Q12860	CNTN1	Inverse variance weighted (fixed effects)	3	0.0736262	0.033066	0.025971	0.583707
Ischemic stroke	SomaScan	13118_5	Q9H4F8	SMOC1	Inverse variance weighted (fixed effects)	3	-0.0847153	0.0380435	0.0259605	0.583707
Cardioembolic stroke	Olink	OID31079	Q92599	SEPTIN8	Wald ratio	1	-0.377726	0.169873	0.0261769	0.584561
Large artery stroke	Olink	OID30202	Q8WXC3	PYDC1	Wald ratio	1	-0.198942	0.0894121	0.0260812	0.584561
Small vessel stroke	Olink	OID20998	Q96GW7	BCAN	Wald ratio	1	-0.245119	0.110239	0.0261801	0.584561
Small vessel stroke	SomaScan	3461_58	Q96GW7	BCAN	Wald ratio	1	-0.286508	0.128853	0.0261801	0.584561
Small vessel stroke	Olink	OID30259	Q92835	INPP5D	Wald ratio	1	-0.290553	0.13082	0.02635	0.587394
Ischemic stroke	Olink	OID31103	O60235	TMPRSS11D	Inverse variance weighted (fixed effects)	2	-0.128293	0.057805	0.0264582	0.587888
Large artery stroke	SomaScan	5021_13	Q15181	PPA1	Inverse variance weighted (fixed effects)	2	-0.256095	0.115365	0.026427	0.587888
Cardioembolic stroke	Olink	OID30141	A6NHS7	MANSC4	Inverse variance weighted (fixed effects)	3	-0.0828034	0.0373513	0.0266312	0.590772
Cardioembolic stroke	Olink	OID30641	P21854	CD72	Wald ratio	1	0.259651	0.117204	0.0267337	0.592084
Cardioembolic stroke	SomaScan	13704_5	P54868	HMGCS2	Wald ratio	1	0.666052	0.300738	0.026779	0.592128
Ischemic stroke	Olink	OID30342	Q969X0	RILPL2	Wald ratio	1	0.288699	0.130531	0.0269856	0.592881
Ischemic stroke	Olink	OID30233	P01225	FSHB	Wald ratio	1	0.149131	0.0674153	0.0269583	0.592881
Large artery stroke	SomaScan	16803_4	P22676	CALB2	Wald ratio	1	0.94605	0.427746	0.0269866	0.592881
Large artery stroke	SomaScan	17156_72	O15075	DCLK1	Wald ratio	1	-0.25943	0.117295	0.0269829	0.592881
Ischemic stroke	Olink	OID20204	Q9BQB4	SOST	Wald ratio	1	-0.274761	0.124297	0.0270687	0.593117
Cardioembolic stroke	Olink	OID21151	Q9Y624	F11R	Wald ratio	1	0.655238	0.296531	0.0271276	0.593117
Small vessel stroke	SomaScan	11441_11	P06737	PYGL	Wald ratio	1	-0.429467	0.194357	0.0271276	0.593117
Cardioembolic stroke	Olink	OID20498	Q13261	IL15RA	Inverse variance weighted (fixed effects)	2	0.143893	0.0652422	0.0274171	0.595636
Cardioembolic stroke	SomaScan	4127_75	P13671	C6	Inverse variance weighted (fixed effects)	2	0.172449	0.0781664	0.0273712	0.595636
Large artery stroke	Olink	OID30369	P02730	SLC4A1	Wald ratio	1	0.881345	0.399359	0.0273213	0.595636
Large artery stroke	Olink	OID31522	Q9NPJ3	ACOT13	Wald ratio	1	-0.815266	0.369627	0.0274089	0.595636
Ischemic stroke	Olink	OID31483	Q14246	ADGRE1	Inverse variance weighted (fixed effects)	2	0.0650308	0.0295097	0.0275448	0.597
Cardioembolic stroke	SomaScan	11356_19	Q96DF8	DGCR14	Wald ratio	1	-0.364759	0.165544	0.0275673	0.597
Large artery stroke	SomaScan	12016_60	P22681	CBL	Wald ratio	1	-0.348938	0.158537	0.0277366	0.597823
Large artery stroke	SomaScan	6404_20	O75973	C1QL1	Inverse variance weighted (fixed effects)	2	0.226169	0.102712	0.0276667	0.597823
Small vessel stroke	SomaScan	4435_66	Q6UWV6	ENPP7	Inverse variance weighted (fixed effects)	3	-0.127555	0.0579519	0.027732	0.597823
Large artery stroke	Olink	OID31292	Q9UHJ6	SHPK	Wald ratio	1	-0.584289	0.265586	0.0278069	0.598288
Large artery stroke	SomaScan	13534_20	P54296	MYOM2	Wald ratio	1	-0.716192	0.325623	0.0278457	0.598288
Large artery stroke	Olink	OID20371	Q07654	TFF3	Inverse variance weighted (fixed effects)	2	-0.374388	0.170482	0.0280886	0.60256
Large artery stroke	SomaScan	2750_3	P02647	APOA1	Inverse variance weighted (fixed effects)	2	-0.264975	0.120726	0.0281747	0.603461
Large artery stroke	Olink	OID21420	P20472	PVALB	Inverse variance weighted (fixed effects)	3	0.101927	0.0464898	0.0283468	0.605248
Large artery stroke	SomaScan	11102_22	Q9BYZ8	REG4	Inverse variance weighted (fixed effects)	2	-0.367485	0.167595	0.0283291	0.605248
Cardioembolic stroke	Olink	OID30685	P04278	SHBG	Wald ratio	1	-0.133706	0.0610081	0.0284072	0.605592
Cardioembolic stroke	Olink	OID21289	Q6UXD5	SEZ6L2	Inverse variance weighted (fixed effects)	2	-0.233637	0.106827	0.0287383	0.608656
Cardioembolic stroke	Olink	OID30290	Q9BVM4	GGACT	Wald ratio	1	0.100842	0.0461297	0.0288122	0.608656
Cardioembolic stroke	Olink	OID21294	Q9Y653	ADGRG1	Wald ratio	1	-0.526654	0.240796	0.0287327	0.608656
Cardioembolic stroke	SomaScan	7140_1	P08217	CELA2A	Wald ratio	1	-0.405525	0.185496	0.0288032	0.608656
Large artery stroke	SomaScan	5704_74	P51124	GZMM	Wald ratio	1	1.3253	0.605852	0.028706	0.608656
Small vessel stroke	SomaScan	19267_14	Q16775	HAGH	Wald ratio	1	0.294007	0.134497	0.0288182	0.608656
Large artery stroke	SomaScan	5349_69	O00548	DLL1	Inverse variance weighted (fixed effects)	2	-0.461392	0.211148	0.0288773	0.608963
Ischemic stroke	Olink	OID20724	P25942	CD40	Inverse variance weighted (fixed effects)	2	-0.0467347	0.0217157	0.0313887	0.609082
Ischemic stroke	Olink	OID20443	Q96P31	FCRL3	Inverse variance weighted (fixed effects)	3	-0.0401015	0.0186332	0.0313853	0.609082
Ischemic stroke	Olink	OID30652	P49862	KLK7	Wald ratio	1	-0.0729614	0.0336745	0.0302603	0.609082
Ischemic stroke	Olink	OID30646	P22455	FGFR4	Inverse variance weighted (fixed effects)	3	-0.0307497	0.0141325	0.0295686	0.609082
Ischemic stroke	Olink	OID21036	P12429	ANXA3	Wald ratio	1	0.18094	0.0838503	0.030936	0.609082
Ischemic stroke	Olink	OID21238	P30260	CDC27	Wald ratio	1	-0.199213	0.0918881	0.0301587	0.609082
Ischemic stroke	Olink	OID20365	Q9UBR2	CTSZ	Wald ratio	1	-0.0710152	0.0327056	0.0299049	0.609082
Ischemic stroke	Olink	OID30319	P53674	CRYBB1	Wald ratio	1	0.0963029	0.0446437	0.0309945	0.609082
Ischemic stroke	Olink	OID30125	O15305	PMM2	Wald ratio	1	-0.079426	0.0369184	0.0314451	0.609082
Ischemic stroke	Olink	OID20285	Q9H1U4	MEGF9	Inverse variance weighted (fixed effects)	2	-0.0512798	0.02378	0.0310505	0.609082
Ischemic stroke	SomaScan	13940_19	Q16666	IFI16	Wald ratio	1	0.219539	0.102086	0.0315127	0.609082
Ischemic stroke	SomaScan	4982_54	P19957	PI3	Inverse variance weighted (fixed effects)	2	0.0565012	0.0261092	0.0304617	0.609082
Ischemic stroke	SomaScan	13112_179	Q12841	FSTL1	Inverse variance weighted (fixed effects)	2	-0.102217	0.0469445	0.0294509	0.609082
Ischemic stroke	SomaScan	17751_68	P53674	CRYBB1	Wald ratio	1	0.0873843	0.0405093	0.0309945	0.609082
Ischemic stroke	SomaScan	5701_81	P05452	CLEC3B	Wald ratio	1	0.0936422	0.0433711	0.0308431	0.609082
Ischemic stroke	SomaScan	9848_22	P51946	CCNH	Wald ratio	1	-0.186916	0.086189	0.0301074	0.609082
Ischemic stroke	SomaScan	9790_28	Q8IWQ3	BRSK2	Wald ratio	1	-0.106383	0.0488787	0.0295201	0.609082
Cardioembolic stroke	Olink	OID20933	O60609	GFRA3	Wald ratio	1	-0.481478	0.221131	0.0294552	0.609082
Cardioembolic stroke	Olink	OID20624	O43508	TNFSF12	Inverse variance weighted (fixed effects)	3	-0.110588	0.0509882	0.0300902	0.609082
Cardioembolic stroke	Olink	OID31439	Q9Y3L3	SH3BP1	Inverse variance weighted (fixed effects)	2	0.176329	0.0814034	0.0303028	0.609082
Cardioembolic stroke	Olink	OID21455	P51858	HDGF	Inverse variance weighted (fixed effects)	3	-0.0770869	0.0353158	0.0290515	0.609082
Cardioembolic stroke	Olink	OID21075	P19440	GGT1	Wald ratio	1	0.156205	0.0720039	0.0300524	0.609082
Cardioembolic stroke	Olink	OID20709	P29279	CCN2	Inverse variance weighted (fixed effects)	2	0.112036	0.052013	0.0312404	0.609082
Cardioembolic stroke	Olink	OID30241	P50053	KHK	Inverse variance weighted (fixed effects)	2	0.124881	0.0579838	0.0312619	0.609082
Cardioembolic stroke	Olink	OID30260	Q09666	AHNAK	Wald ratio	1	-0.24621	0.1137	0.030355	0.609082
Cardioembolic stroke	Olink	OID31028	Q9H6H4	REEP4	Wald ratio	1	-0.570655	0.262165	0.0295024	0.609082
Cardioembolic stroke	Olink	OID31002	B2RUY7	VWC2L	Wald ratio	1	0.407799	0.18674	0.0289781	0.609082
Cardioembolic stroke	Olink	OID31084	Q96RU2	USP28	Inverse variance weighted (fixed effects)	2	-0.376617	0.174349	0.0307625	0.609082
Cardioembolic stroke	SomaScan	12396_19	Q6NVY1	HIBCH	Inverse variance weighted (fixed effects)	2	-0.109699	0.0510017	0.0314844	0.609082
Cardioembolic stroke	SomaScan	2632_5	P42701	IL12RB1	Wald ratio	1	-0.466498	0.216182	0.030936	0.609082
Cardioembolic stroke	SomaScan	8974_172	P39059	COL15A1	Inverse variance weighted (fixed effects)	2	0.159107	0.0734392	0.0302722	0.609082
Cardioembolic stroke	SomaScan	11547_84	O15146	MUSK	Wald ratio	1	-0.539755	0.250765	0.0313628	0.609082
Cardioembolic stroke	SomaScan	3438_10	O95633	FSTL3	Wald ratio	1	-0.552332	0.254922	0.0302603	0.609082
Cardioembolic stroke	SomaScan	16609_106	Q6UWL6	KIRREL2	Inverse variance weighted (fixed effects)	3	-0.131568	0.0608279	0.0305443	0.609082
Large artery stroke	Olink	OID30592	Q8NDA2	HMCN2	Inverse variance weighted (fixed effects)	2	-0.141737	0.0658949	0.0314792	0.609082
Large artery stroke	Olink	OID20769	Q16363	LAMA4	Wald ratio	1	-0.276841	0.127634	0.0300816	0.609082
Large artery stroke	Olink	OID21082	O15389	SIGLEC5	Inverse variance weighted (fixed effects)	3	0.1191	0.0553723	0.031485	0.609082
Large artery stroke	Olink	OID21494	Q92832	NELL1	Inverse variance weighted (fixed effects)	3	0.156499	0.0723284	0.0304848	0.609082
Large artery stroke	Olink	OID20372	P08709	F7	Inverse variance weighted (fixed effects)	2	0.189993	0.0871142	0.0291859	0.609082
Large artery stroke	Olink	OID30718	Q04756	HGFAC	Inverse variance weighted (fixed effects)	2	-0.150238	0.0690634	0.0296032	0.609082
Large artery stroke	Olink	OID20214	P35247	SFTPD	Inverse variance weighted (fixed effects)	3	-0.133862	0.0613867	0.0292102	0.609082
Large artery stroke	SomaScan	2571_12	P17936	IGFBP3	Inverse variance weighted (fixed effects)	3	-0.229695	0.105274	0.0291191	0.609082
Large artery stroke	SomaScan	9409_11	Q15661	TPSAB1	Inverse variance weighted (fixed effects)	4	-0.116013	0.0538357	0.0311666	0.609082
Large artery stroke	SomaScan	6923_1	O00469	PLOD2	Wald ratio	1	-0.563659	0.262052	0.0314807	0.609082
Large artery stroke	SomaScan	16792_4	O15389	SIGLEC5	Inverse variance weighted (fixed effects)	3	0.0796552	0.0370255	0.0314478	0.609082
Small vessel stroke	Olink	OID20115	O14793	MSTN	Wald ratio	1	-1.20425	0.5589	0.0311866	0.609082
Small vessel stroke	Olink	OID21008	P22223	CDH3	Wald ratio	1	-0.580308	0.267918	0.0303118	0.609082
Small vessel stroke	Olink	OID20171	Q8NI22	MCFD2	Wald ratio	1	0.327736	0.151844	0.030899	0.609082
Small vessel stroke	Olink	OID20674	O15444	CCL25	Inverse variance weighted (fixed effects)	3	0.150955	0.0693278	0.02945	0.609082
Small vessel stroke	Olink	OID21449	P06127	CD5	Inverse variance weighted (fixed effects)	2	-0.285119	0.132451	0.0313468	0.609082
Small vessel stroke	Olink	OID30430	Q04609	FOLH1	Wald ratio	1	-0.540319	0.248381	0.0296027	0.609082
Small vessel stroke	Olink	OID20641	P36959	GMPR	Wald ratio	1	-0.177728	0.0825168	0.0312522	0.609082
Small vessel stroke	SomaScan	13603_7	Q8TAC1	RFESD	Wald ratio	1	-0.754823	0.346609	0.0294256	0.609082
Small vessel stroke	SomaScan	12697_30	P48426	PIP4K2A	Wald ratio	1	-0.386838	0.177368	0.0291838	0.609082
Small vessel stroke	SomaScan	13463_1	Q92626	PXDN	Inverse variance weighted (fixed effects)	2	0.311134	0.143948	0.0306619	0.609082
Small vessel stroke	SomaScan	4159_130	P08603	CFH	Wald ratio	1	-0.206395	0.0959302	0.0314356	0.609082
Small vessel stroke	SomaScan	19448_104	Q16831	UPP1	Wald ratio	1	0.477715	0.219711	0.0296837	0.609082
Small vessel stroke	SomaScan	17329_2	Q9BUT1	BDH2	Inverse variance weighted (fixed effects)	2	-0.206211	0.0958111	0.0313763	0.609082
Small vessel stroke	SomaScan	11360_39	P23921	RRM1	Wald ratio	1	0.783636	0.361818	0.0303242	0.609082
Ischemic stroke	Olink	OID20708	Q14210	LY6D	Inverse variance weighted (fixed effects)	3	0.0479207	0.0223075	0.0316986	0.610947
Small vessel stroke	SomaScan	8465_52	P09668	CTSH	Inverse variance weighted (fixed effects)	3	-0.0858588	0.0399607	0.0316676	0.610947
Cardioembolic stroke	SomaScan	3168_8	Q9UNA0	ADAMTS5	Inverse variance weighted (fixed effects)	2	-0.0855509	0.0398433	0.0317786	0.611576
Large artery stroke	Olink	OID21525	O00548	DLL1	Inverse variance weighted (fixed effects)	3	-0.285782	0.133129	0.0318208	0.611576
Ischemic stroke	Olink	OID21311	Q9BTE6	AARSD1	Wald ratio	1	-0.123803	0.057724	0.0319739	0.612853
Ischemic stroke	Olink	OID31492	O43312	MTSS1	Wald ratio	1	0.30909	0.1445	0.0324326	0.612853
Ischemic stroke	SomaScan	13733_5	P29460	IL12B	Inverse variance weighted (fixed effects)	2	-0.0390179	0.0182541	0.032559	0.612853
Ischemic stroke	SomaScan	18243_9	P30085	CMPK1	Wald ratio	1	-0.206235	0.0965228	0.0326268	0.612853
Ischemic stroke	SomaScan	9264_11	P43234	CTSO	Wald ratio	1	-0.107062	0.0501139	0.0326498	0.612853
Cardioembolic stroke	Olink	OID30650	O60279	SUSD5	Inverse variance weighted (fixed effects)	3	0.106098	0.0494924	0.0320548	0.612853
Cardioembolic stroke	Olink	OID30536	P52630	STAT2	Inverse variance weighted (fixed effects)	2	-0.293512	0.137448	0.0327249	0.612853
Cardioembolic stroke	Olink	OID20789	Q13232	NME3	Wald ratio	1	-0.274888	0.128737	0.0327393	0.612853
Cardioembolic stroke	Olink	OID30779	P08697	SERPINF2	Wald ratio	1	-0.236818	0.110676	0.0323759	0.612853
Cardioembolic stroke	SomaScan	4500_50	Q9Y240	CLEC11A	Inverse variance weighted (fixed effects)	2	0.121956	0.0569823	0.0323346	0.612853
Cardioembolic stroke	SomaScan	9482_110	Q9BW91	NUDT9	Wald ratio	1	-0.354605	0.166062	0.0327307	0.612853
Large artery stroke	Olink	OID21407	Q9P0G3	KLK14	Inverse variance weighted (fixed effects)	3	-0.154698	0.0722491	0.0322605	0.612853
Large artery stroke	SomaScan	10514_5	P41222	PTGDS	Wald ratio	1	-0.352482	0.164539	0.0321741	0.612853
Large artery stroke	SomaScan	12682_5	Q6YP21	CCBL2	Wald ratio	1	-0.158392	0.0741259	0.0326149	0.612853
Small vessel stroke	Olink	OID20622	Q6UXB2	CXCL17	Wald ratio	1	0.702989	0.328175	0.0321839	0.612853
Small vessel stroke	Olink	OID20646	Q9Y6Q6	TNFRSF11A	Inverse variance weighted (fixed effects)	3	0.101922	0.0475464	0.0320619	0.612853
Small vessel stroke	Olink	OID30925	P63172	DYNLT1	Wald ratio	1	0.54094	0.252439	0.0321246	0.612853
Small vessel stroke	Olink	OID31110	Q6P1J6	PLB1	Inverse variance weighted (fixed effects)	3	0.120872	0.0564804	0.032349	0.612853
Small vessel stroke	SomaScan	10974_20	P58062	SPINK7	Wald ratio	1	0.360817	0.168684	0.0324346	0.612853
Large artery stroke	SomaScan	3488_64	P04040	CAT	Inverse variance weighted (fixed effects)	2	-0.229452	0.107505	0.0328147	0.613424
Large artery stroke	SomaScan	3079_62	Q99969	RARRES2	Wald ratio	1	0.211562	0.099157	0.0328753	0.613717
Small vessel stroke	SomaScan	4249_64	P22392	NME2	Wald ratio	1	-0.342225	0.160613	0.0331104	0.617263
Large artery stroke	SomaScan	4157_2	P00734	F2	Wald ratio	1	0.424	0.199111	0.0332159	0.618385
Ischemic stroke	Olink	OID30727	P02649	APOE	Inverse variance weighted (fixed effects)	4	-0.039996	0.0187916	0.0333043	0.618431
Small vessel stroke	SomaScan	9266_1	Q9NP99	TREM1	Inverse variance weighted (fixed effects)	3	-0.142556	0.0669798	0.0333089	0.618431
Ischemic stroke	SomaScan	12016_60	P22681	CBL	Wald ratio	1	-0.125492	0.0590087	0.0334478	0.619328
Large artery stroke	SomaScan	4430_44	Q9BWP8	COLEC11	Inverse variance weighted (fixed effects)	5	0.0871968	0.040998	0.0334323	0.619328
Ischemic stroke	Olink	OID21230	Q8WUX2	CHAC2	Wald ratio	1	-0.126645	0.0609772	0.0378087	0.619501
Ischemic stroke	Olink	OID30750	P01009	SERPINA1	Inverse variance weighted (fixed effects)	2	0.102934	0.0497954	0.0387208	0.619501
Ischemic stroke	Olink	OID31094	Q5VV43	KIAA0319	Inverse variance weighted (fixed effects)	3	-0.0462011	0.0224386	0.0394945	0.619501
Ischemic stroke	Olink	OID21028	P17405	SMPD1	Inverse variance weighted (fixed effects)	2	0.0396645	0.018712	0.0340281	0.619501
Ischemic stroke	Olink	OID21463	O15123	ANGPT2	Inverse variance weighted (fixed effects)	2	-0.0758998	0.0366413	0.038319	0.619501
Ischemic stroke	Olink	OID20711	Q99685	MGLL	Wald ratio	1	0.255884	0.121296	0.0348938	0.619501
Ischemic stroke	Olink	OID30321	O14933	UBE2L6	Wald ratio	1	0.0630154	0.03072	0.0402395	0.619501
Ischemic stroke	Olink	OID30787	P02751	FN1	Wald ratio	1	-0.0412053	0.0195308	0.0348794	0.619501
Ischemic stroke	Olink	OID20807	P45452	MMP13	Wald ratio	1	0.109077	0.05163	0.0346285	0.619501
Ischemic stroke	Olink	OID20361	Q14515	SPARCL1	Inverse variance weighted (fixed effects)	3	0.038504	0.0185634	0.0380611	0.619501
Ischemic stroke	Olink	OID20859	Q9Y2V2	CARHSP1	Wald ratio	1	0.20213	0.0952713	0.0338695	0.619501
Ischemic stroke	Olink	OID20540	P78410	BTN3A2	Wald ratio	1	-0.202784	0.0961658	0.0349709	0.619501
Ischemic stroke	Olink	OID20387	O75015	FCGR3B	Inverse variance weighted (fixed effects)	2	-0.0504247	0.0242137	0.0372981	0.619501
Ischemic stroke	Olink	OID30778	P02743	APCS	Inverse variance weighted (fixed effects)	2	-0.071999	0.0342238	0.0353985	0.619501
Ischemic stroke	Olink	OID21505	Q14508	WFDC2	Wald ratio	1	-0.183175	0.0872607	0.0358016	0.619501
Ischemic stroke	Olink	OID20322	P10451	SPP1	Wald ratio	1	-0.165528	0.0788229	0.0357288	0.619501
Ischemic stroke	Olink	OID30515	Q7Z5L3	C1QL2	Inverse variance weighted (fixed effects)	3	0.0571066	0.0271417	0.0353771	0.619501
Ischemic stroke	Olink	OID30510	Q96PX8	SLITRK1	Wald ratio	1	0.125251	0.0610361	0.0401616	0.619501
Ischemic stroke	Olink	OID20079	P62736	ACTA2	Wald ratio	1	0.244133	0.116254	0.0357288	0.619501
Ischemic stroke	Olink	OID30924	Q5VT99	LRRC38	Inverse variance weighted (fixed effects)	2	0.0525324	0.0247876	0.0340653	0.619501
Ischemic stroke	SomaScan	3038_9	O14625	CXCL11	Inverse variance weighted (fixed effects)	2	0.0446693	0.0217099	0.0396324	0.619501
Ischemic stroke	SomaScan	15506_34	Q9Y561	LRP12	Wald ratio	1	0.280405	0.135135	0.0379865	0.619501
Ischemic stroke	SomaScan	18215_5	Q9NWX6	THG1L	Inverse variance weighted (fixed effects)	2	-0.0426987	0.0200936	0.0335875	0.619501
Ischemic stroke	SomaScan	7769_29	P78314	SH3BP2	Wald ratio	1	-0.0596026	0.0288274	0.0386807	0.619501
Ischemic stroke	SomaScan	5006_71	O15264	MAPK13	Wald ratio	1	-0.145329	0.0692042	0.0357288	0.619501
Ischemic stroke	SomaScan	9754_33	P16083	NQO2	Inverse variance weighted (fixed effects)	4	-0.0269068	0.0127655	0.0350499	0.619501
Ischemic stroke	SomaScan	11540_37	O43524	FOXO3	Wald ratio	1	0.29653	0.141956	0.0367177	0.619501
Ischemic stroke	SomaScan	3206_4	Q9Y5Y7	LYVE1	Inverse variance weighted (fixed effects)	3	0.0682051	0.0329298	0.0383377	0.619501
Ischemic stroke	SomaScan	8697_38	P35052	GPC1	Inverse variance weighted (fixed effects)	2	-0.0382821	0.0182854	0.0362973	0.619501
Ischemic stroke	SomaScan	14684_17	P17655	CAPN2	Inverse variance weighted (fixed effects)	2	0.123633	0.0592087	0.0367904	0.619501
Ischemic stroke	SomaScan	9212_22	Q9UBX1	CTSF	Wald ratio	1	-0.087405	0.0418024	0.0365362	0.619501
Ischemic stroke	SomaScan	8874_53	O75503	CLN5	Wald ratio	1	0.155233	0.0744186	0.0369843	0.619501
Ischemic stroke	SomaScan	9832_33	Q93099	HGD	Inverse variance weighted (fixed effects)	2	-0.141741	0.0681991	0.0376775	0.619501
Ischemic stroke	SomaScan	5000_52	Q08380	LGALS3BP	Inverse variance weighted (fixed effects)	2	0.0978562	0.0473037	0.0385762	0.619501
Ischemic stroke	SomaScan	15562_24	P08236	GUSB	Inverse variance weighted (fixed effects)	2	-0.0919853	0.0440052	0.0365885	0.619501
Ischemic stroke	SomaScan	3077_66	P00742	F10	Inverse variance weighted (fixed effects)	2	0.108235	0.052383	0.038807	0.619501
Ischemic stroke	SomaScan	8288_27	P02749	APOH	Inverse variance weighted (fixed effects)	2	-0.0352015	0.0166872	0.0349023	0.619501
Ischemic stroke	SomaScan	15539_15	Q96PX8	SLITRK1	Wald ratio	1	0.239951	0.116931	0.0401616	0.619501
Ischemic stroke	SomaScan	15363_32	Q6Q788	APOA5	Inverse variance weighted (fixed effects)	3	-0.0416859	0.0196894	0.0342451	0.619501
Ischemic stroke	SomaScan	18839_24	P01266	TG	Wald ratio	1	0.250335	0.117805	0.0335866	0.619501
Cardioembolic stroke	Olink	OID21349	Q8N9I9	DTX3	Wald ratio	1	-0.353205	0.168367	0.0359205	0.619501
Cardioembolic stroke	Olink	OID20782	O95633	FSTL3	Wald ratio	1	-0.429177	0.207666	0.0387656	0.619501
Cardioembolic stroke	Olink	OID20298	P09093	CELA3A	Wald ratio	1	-0.173621	0.0827975	0.035999	0.619501
Cardioembolic stroke	Olink	OID20847	Q03393	PTS	Wald ratio	1	-0.163001	0.0793782	0.0400264	0.619501
Cardioembolic stroke	Olink	OID20553	Q9H0P0	NT5C3A	Wald ratio	1	0.32862	0.157406	0.0368232	0.619501
Cardioembolic stroke	Olink	OID31525	O15182	CETN3	Wald ratio	1	0.340515	0.162177	0.0357602	0.619501
Cardioembolic stroke	Olink	OID31031	P51687	SUOX	Wald ratio	1	-0.627424	0.305334	0.0398908	0.619501
Cardioembolic stroke	Olink	OID31417	P61812	TGFB2	Wald ratio	1	0.259883	0.124601	0.0370045	0.619501
Cardioembolic stroke	Olink	OID21406	P47929;P47929	LGALS7B;LGALS7	Inverse variance weighted (fixed effects)	2	0.150214	0.0732319	0.0402464	0.619501
Cardioembolic stroke	Olink	OID20783	Q92956	TNFRSF14	Wald ratio	1	0.30925	0.14722	0.0356768	0.619501
Cardioembolic stroke	Olink	OID30297	Q14914	PTGR1	Inverse variance weighted (fixed effects)	3	0.112583	0.053093	0.0339656	0.619501
Cardioembolic stroke	Olink	OID30631	P30047	GCHFR	Wald ratio	1	0.318825	0.152125	0.0360992	0.619501
Cardioembolic stroke	Olink	OID20185	Q86VZ4	LRP11	Inverse variance weighted (fixed effects)	3	0.100266	0.0474523	0.0346013	0.619501
Cardioembolic stroke	Olink	OID30351	P05413	FABP3	Inverse variance weighted (fixed effects)	2	-0.387966	0.188252	0.0393143	0.619501
Cardioembolic stroke	Olink	OID31502	Q15172	PPP2R5A	Wald ratio	1	0.378332	0.183686	0.0394297	0.619501
Cardioembolic stroke	Olink	OID21097	P00995	SPINK1	Inverse variance weighted (fixed effects)	2	-0.0924387	0.0450374	0.0401222	0.619501
Cardioembolic stroke	Olink	OID20621	P01137	TGFB1	Wald ratio	1	0.168764	0.0822985	0.0403027	0.619501
Cardioembolic stroke	Olink	OID20256	P04275	VWF	Wald ratio	1	0.383432	0.184539	0.0377298	0.619501
Cardioembolic stroke	Olink	OID30541	Q8WV28	BLNK	Wald ratio	1	-0.592512	0.285209	0.0377587	0.619501
Cardioembolic stroke	Olink	OID21037	P06733	ENO1	Wald ratio	1	-0.571015	0.269407	0.0340464	0.619501
Cardioembolic stroke	Olink	OID30416	P11279	LAMP1	Wald ratio	1	-0.662815	0.313412	0.0344442	0.619501
Cardioembolic stroke	Olink	OID31399	Q8N5J2	MINDY1	Inverse variance weighted (fixed effects)	2	0.419956	0.20218	0.0377888	0.619501
Cardioembolic stroke	SomaScan	5615_62	Q8WUF8	FAM172A	Wald ratio	1	0.518595	0.25	0.038044	0.619501
Cardioembolic stroke	SomaScan	13114_50	P51884	LUM	Inverse variance weighted (fixed effects)	2	0.280722	0.135303	0.0380076	0.619501
Cardioembolic stroke	SomaScan	12524_18	Q96F10	SAT2	Inverse variance weighted (fixed effects)	2	-0.162382	0.0767435	0.0343523	0.619501
Cardioembolic stroke	SomaScan	2700_56	P07225	PROS1	Wald ratio	1	-0.616136	0.295478	0.0370496	0.619501
Cardioembolic stroke	SomaScan	17410_5	O15182	CETN3	Wald ratio	1	0.743073	0.353904	0.0357602	0.619501
Cardioembolic stroke	SomaScan	9754_33	P16083	NQO2	Inverse variance weighted (fixed effects)	4	-0.0600934	0.0284288	0.0345303	0.619501
Cardioembolic stroke	SomaScan	12411_60	P61244	MAX	Wald ratio	1	0.19398	0.0936455	0.0383188	0.619501
Cardioembolic stroke	SomaScan	8840_61	P09871	C1S	Inverse variance weighted (fixed effects)	2	-0.358642	0.173625	0.0388653	0.619501
Large artery stroke	Olink	OID31430	Q86UX2	ITIH5	Wald ratio	1	0.549861	0.263672	0.0370336	0.619501
Large artery stroke	Olink	OID30396	P39059	COL15A1	Inverse variance weighted (fixed effects)	2	0.214973	0.103643	0.0380642	0.619501
Large artery stroke	Olink	OID20287	P17813	ENG	Wald ratio	1	-0.304396	0.147233	0.0386919	0.619501
Large artery stroke	Olink	OID20709	P29279	CCN2	Wald ratio	1	0.153767	0.0727925	0.0346519	0.619501
Large artery stroke	Olink	OID20201	P00797	REN	Wald ratio	1	-0.64705	0.308432	0.0359164	0.619501
Large artery stroke	Olink	OID21043	Q01469	FABP5	Wald ratio	1	-0.570433	0.272663	0.0364313	0.619501
Large artery stroke	Olink	OID20471	Q14435	GALNT3	Inverse variance weighted (fixed effects)	3	-0.135837	0.0652173	0.0372659	0.619501
Large artery stroke	Olink	OID21418	Q496F6	CD300E	Inverse variance weighted (fixed effects)	2	-0.138798	0.0674775	0.0396907	0.619501
Large artery stroke	Olink	OID20381	P07359	GP1BA	Wald ratio	1	-0.386942	0.188443	0.0400366	0.619501
Large artery stroke	Olink	OID30744	P01031	C5	Wald ratio	1	0.305624	0.148266	0.0392724	0.619501
Large artery stroke	Olink	OID21159	P28799	GRN	Inverse variance weighted (fixed effects)	2	-0.244744	0.118027	0.0381141	0.619501
Large artery stroke	Olink	OID20255	Q03167	TGFBR3	Inverse variance weighted (fixed effects)	2	0.32491	0.156315	0.0376581	0.619501
Large artery stroke	Olink	OID21502	Q9UP79	ADAMTS8	Inverse variance weighted (fixed effects)	2	-0.1244	0.0606114	0.040129	0.619501
Large artery stroke	Olink	OID31086	O15269	SPTLC1	Inverse variance weighted (fixed effects)	2	-0.504044	0.239551	0.0353677	0.619501
Large artery stroke	Olink	OID31411	Q96A25	TMEM106A	Wald ratio	1	-0.437144	0.212795	0.0399468	0.619501
Large artery stroke	Olink	OID30640	Q96AJ9	VTI1A	Wald ratio	1	-0.807028	0.393078	0.0400631	0.619501
Large artery stroke	Olink	OID30364	P07288	KLK3	Wald ratio	1	0.852056	0.412224	0.0387365	0.619501
Large artery stroke	Olink	OID20970	Q6UX15	LAYN	Inverse variance weighted (fixed effects)	2	-0.158305	0.0745555	0.0337275	0.619501
Large artery stroke	Olink	OID30587	P20908	COL5A1	Inverse variance weighted (fixed effects)	3	-0.193681	0.0929267	0.0371389	0.619501
Large artery stroke	Olink	OID30668	P32119	PRDX2	Wald ratio	1	-0.546328	0.25973	0.0354266	0.619501
Large artery stroke	Olink	OID20617	Q07065	CKAP4	Wald ratio	1	-0.24675	0.120016	0.0397854	0.619501
Large artery stroke	Olink	OID21142	Q969Z4	RELT	Inverse variance weighted (fixed effects)	2	-0.166317	0.0803295	0.0384118	0.619501
Large artery stroke	Olink	OID31367	Q9GZZ8	LACRT	Wald ratio	1	-0.671465	0.327161	0.0401306	0.619501
Large artery stroke	Olink	OID20481	Q8TAD2	IL17D	Inverse variance weighted (fixed effects)	2	-0.143335	0.0685539	0.0365422	0.619501
Large artery stroke	Olink	OID21163	Q7Z6M1	RABEPK	Wald ratio	1	0.323103	0.152871	0.0345525	0.619501
Large artery stroke	SomaScan	19117_3	Q96A00	PPP1R14A	Wald ratio	1	-0.245228	0.118943	0.0392336	0.619501
Large artery stroke	SomaScan	9765_4	Q9NXR1	NDE1	Wald ratio	1	-0.736976	0.358323	0.0397115	0.619501
Large artery stroke	SomaScan	5615_62	Q8WUF8	FAM172A	Wald ratio	1	0.683884	0.326446	0.0361766	0.619501
Large artery stroke	SomaScan	3210_1	P53582	METAP1	Wald ratio	1	0.70229	0.335878	0.0365362	0.619501
Large artery stroke	SomaScan	10833_64	Q96QV1	HHIP	Inverse variance weighted (fixed effects)	2	0.353521	0.166916	0.0341786	0.619501
Large artery stroke	SomaScan	5744_12	Q9BUN1	MENT	Inverse variance weighted (fixed effects)	2	-0.298993	0.145075	0.0393081	0.619501
Large artery stroke	SomaScan	12334_25	P34896	SHMT1	Inverse variance weighted (fixed effects)	2	-0.130249	0.0628403	0.0382011	0.619501
Large artery stroke	SomaScan	12812_25	P14621	ACYP2	Wald ratio	1	-0.200365	0.0972159	0.0392999	0.619501
Large artery stroke	SomaScan	13242_134	Q9BYB0	SHANK3	Inverse variance weighted (fixed effects)	2	0.137842	0.0663718	0.0378189	0.619501
Large artery stroke	SomaScan	3323_37	Q14114	LRP8	Inverse variance weighted (fixed effects)	2	-0.238706	0.112639	0.0340727	0.619501
Large artery stroke	SomaScan	13126_52	Q02487	DSC2	Wald ratio	1	0.277466	0.132848	0.0367431	0.619501
Large artery stroke	SomaScan	16916_19	Q9H5Y7	SLITRK6	Inverse variance weighted (fixed effects)	2	0.250917	0.121726	0.0392716	0.619501
Large artery stroke	SomaScan	15686_49	P55103	INHBC	Inverse variance weighted (fixed effects)	2	-0.0911544	0.0438666	0.0377102	0.619501
Large artery stroke	SomaScan	11248_43	P10746	UROS	Inverse variance weighted (fixed effects)	2	0.285487	0.136672	0.036721	0.619501
Large artery stroke	SomaScan	2687_2	Q16674	MIA	Inverse variance weighted (fixed effects)	4	0.0964646	0.0467092	0.0389025	0.619501
Large artery stroke	SomaScan	18422_41	P53602	MVD	Wald ratio	1	0.862338	0.406494	0.0338877	0.619501
Large artery stroke	SomaScan	5231_79	Q8NBP7	PCSK9	Inverse variance weighted (fixed effects)	2	0.245581	0.119614	0.0400615	0.619501
Small vessel stroke	Olink	OID30763	P05154	SERPINA5	Wald ratio	1	-0.212198	0.101616	0.0367766	0.619501
Small vessel stroke	Olink	OID21138	P15289	ARSA	Inverse variance weighted (fixed effects)	2	0.135171	0.0639052	0.0344148	0.619501
Small vessel stroke	Olink	OID30742	Q96PD5	PGLYRP2	Inverse variance weighted (fixed effects)	3	-0.0816813	0.0387489	0.0350338	0.619501
Small vessel stroke	Olink	OID20231	P07204	THBD	Inverse variance weighted (fixed effects)	2	0.234985	0.112308	0.0364099	0.619501
Small vessel stroke	Olink	OID21204	Q7Z434	MAVS	Wald ratio	1	-0.497715	0.235565	0.0346134	0.619501
Small vessel stroke	Olink	OID20131	Q9H7M9	VSIR	Inverse variance weighted (fixed effects)	2	-0.131034	0.0624304	0.0358278	0.619501
Small vessel stroke	Olink	OID30391	Q96NZ9	PRAP1	Wald ratio	1	0.350849	0.170986	0.0401782	0.619501
Small vessel stroke	Olink	OID30472	Q9UHA7	IL36A	Wald ratio	1	0.72456	0.348685	0.037711	0.619501
Small vessel stroke	Olink	OID21485	P41439	FOLR3	Inverse variance weighted (fixed effects)	3	0.0640404	0.0307411	0.0372312	0.619501
Small vessel stroke	Olink	OID20307	Q12860	CNTN1	Inverse variance weighted (fixed effects)	2	0.19781	0.0960964	0.0395466	0.619501
Small vessel stroke	Olink	OID30927	Q14184	DOC2B	Wald ratio	1	-0.832903	0.400091	0.0373622	0.619501
Small vessel stroke	Olink	OID20293	Q15828	CST6	Inverse variance weighted (fixed effects)	2	0.228129	0.110979	0.0398206	0.619501
Small vessel stroke	Olink	OID20207	P42830	CXCL5	Wald ratio	1	0.149786	0.0719621	0.0373918	0.619501
Small vessel stroke	Olink	OID31451	Q6UW56	ATRAID	Wald ratio	1	-0.160288	0.0778132	0.0394074	0.619501
Small vessel stroke	Olink	OID31061	Q8WXW3	PIBF1	Wald ratio	1	0.687531	0.325162	0.0344787	0.619501
Small vessel stroke	Olink	OID31348	O75843	AP1G2	Wald ratio	1	-0.379066	0.184847	0.0402958	0.619501
Small vessel stroke	Olink	OID20698	P01133	EGF	Wald ratio	1	-0.314437	0.15087	0.0371458	0.619501
Small vessel stroke	Olink	OID20533	P19474	TRIM21	Wald ratio	1	0.795566	0.386984	0.0398005	0.619501
Small vessel stroke	Olink	OID30372	P30046	DDT	Wald ratio	1	-0.233961	0.111387	0.0356904	0.619501
Small vessel stroke	Olink	OID31130	Q8WW22	DNAJA4	Wald ratio	1	-0.356015	0.173541	0.0402211	0.619501
Small vessel stroke	Olink	OID20142	Q9UHL4	DPP7	Inverse variance weighted (fixed effects)	2	-0.337628	0.160879	0.0358484	0.619501
Small vessel stroke	Olink	OID21075	P19440	GGT1	Wald ratio	1	0.188076	0.0889228	0.0344262	0.619501
Small vessel stroke	Olink	OID31016	Q15714	TSC22D1	Wald ratio	1	-0.808265	0.381559	0.0341479	0.619501
Small vessel stroke	Olink	OID20388	P10646	TFPI	Inverse variance weighted (fixed effects)	2	-0.147508	0.0701496	0.0354865	0.619501
Small vessel stroke	SomaScan	16809_1	O00746	NME4	Wald ratio	1	0.307077	0.147692	0.037602	0.619501
Small vessel stroke	SomaScan	7999_23	P49961	ENTPD1	Wald ratio	1	0.296886	0.142561	0.0372946	0.619501
Small vessel stroke	SomaScan	10571_14	P26572	MGAT1	Wald ratio	1	-1.08439	0.519108	0.0367116	0.619501
Small vessel stroke	SomaScan	5508_62	P07339	CTSD	Inverse variance weighted (fixed effects)	2	-0.200356	0.0969914	0.0388555	0.619501
Small vessel stroke	SomaScan	12333_87	P49247	RPIA	Wald ratio	1	0.347576	0.168027	0.0385863	0.619501
Small vessel stroke	SomaScan	3519_3	Q92583	CCL17	Inverse variance weighted (fixed effects)	2	0.172525	0.082847	0.0373007	0.619501
Small vessel stroke	SomaScan	17786_5	O95749	GGPS1	Wald ratio	1	-0.517857	0.245342	0.034793	0.619501
Small vessel stroke	SomaScan	9580_5	Q13753	LAMC2	Inverse variance weighted (fixed effects)	3	0.123234	0.0590024	0.0367415	0.619501
Small vessel stroke	SomaScan	6471_53	Q92496	CFHR4	Inverse variance weighted (fixed effects)	2	0.078149	0.0374277	0.036798	0.619501
Small vessel stroke	SomaScan	2982_82	P56470	LGALS4	Wald ratio	1	0.797373	0.380863	0.036296	0.619501
Small vessel stroke	SomaScan	8229_1	Q4G148	GXYLT1	Inverse variance weighted (fixed effects)	3	0.141615	0.0669663	0.0344543	0.619501
Small vessel stroke	SomaScan	15614_168	Q8N149	LILRA2	Inverse variance weighted (fixed effects)	3	-0.137836	0.0653725	0.03499	0.619501
Small vessel stroke	SomaScan	9321_400	P08949	NMB	Inverse variance weighted (fixed effects)	2	-0.292156	0.141082	0.0383753	0.619501
Small vessel stroke	SomaScan	12437_18	Q6PHR2	ULK3	Wald ratio	1	0.536249	0.258918	0.0383484	0.619501
Small vessel stroke	SomaScan	17675_17	Q9NPJ3	ACOT13	Wald ratio	1	-0.841105	0.407599	0.0390595	0.619501
Ischemic stroke	Olink	OID30356	P45954	ACADSB	Inverse variance weighted (fixed effects)	2	-0.0657907	0.0322387	0.0412768	0.621829
Ischemic stroke	SomaScan	17686_27	Q99426	TBCB	Wald ratio	1	-0.235813	0.115385	0.0409816	0.621829
Ischemic stroke	SomaScan	4971_1	Q9UBR2	CTSZ	Inverse variance weighted (fixed effects)	2	-0.0644801	0.0316159	0.0414021	0.621829
Ischemic stroke	SomaScan	15472_16	Q86VZ4	LRP11	Inverse variance weighted (fixed effects)	3	0.0278143	0.0136115	0.0410087	0.621829
Ischemic stroke	SomaScan	3009_3	Q03167	TGFBR3	Wald ratio	1	-0.163148	0.0796545	0.0405411	0.621829
Ischemic stroke	SomaScan	17140_57	Q9GZP0	PDGFD	Inverse variance weighted (fixed effects)	3	-0.0401286	0.0196135	0.0407592	0.621829
Cardioembolic stroke	Olink	OID21496	Q02763	TEK	Inverse variance weighted (fixed effects)	2	0.0779101	0.0380764	0.0407412	0.621829
Cardioembolic stroke	SomaScan	14091_42	O75828	CBR3	Inverse variance weighted (fixed effects)	3	0.0846048	0.0413498	0.0407488	0.621829
Large artery stroke	Olink	OID31477	Q9UH65	SWAP70	Inverse variance weighted (fixed effects)	3	-0.252941	0.123639	0.0407751	0.621829
Large artery stroke	Olink	OID30811	P60880	SNAP25	Wald ratio	1	-0.449585	0.220404	0.041368	0.621829
Large artery stroke	Olink	OID30690	O00602	FCN1	Inverse variance weighted (fixed effects)	3	0.156912	0.0768147	0.0410789	0.621829
Large artery stroke	Olink	OID20086	P21964	COMT	Inverse variance weighted (fixed effects)	2	-0.137186	0.0671904	0.0411768	0.621829
Large artery stroke	Olink	OID31011	Q96A00	PPP1R14A	Inverse variance weighted (fixed effects)	2	-0.213391	0.104573	0.0412918	0.621829
Large artery stroke	Olink	OID20987	P56279	TCL1A	Inverse variance weighted (fixed effects)	2	-0.156761	0.0766703	0.0408929	0.621829
Large artery stroke	SomaScan	19277_4	Q8NFU3	TSTD1	Inverse variance weighted (fixed effects)	2	0.131819	0.0644032	0.0406801	0.621829
Large artery stroke	SomaScan	19143_38	Q6BCY4	CYB5R2	Inverse variance weighted (fixed effects)	3	-0.180836	0.0885543	0.0411428	0.621829
Large artery stroke	SomaScan	19558_10	O75096	LRP4	Inverse variance weighted (fixed effects)	2	0.117623	0.0576752	0.0414098	0.621829
Large artery stroke	SomaScan	4563_61	P19174	PLCG1	Wald ratio	1	0.651719	0.318386	0.0406632	0.621829
Small vessel stroke	Olink	OID30241	P50053	KHK	Inverse variance weighted (fixed effects)	2	-0.140056	0.0684965	0.0408827	0.621829
Small vessel stroke	SomaScan	2860_19	P52292	KPNA2	Wald ratio	1	0.774295	0.37931	0.0412188	0.621829
Small vessel stroke	SomaScan	19143_38	Q6BCY4	CYB5R2	Inverse variance weighted (fixed effects)	3	0.167842	0.0822485	0.0412832	0.621829
Cardioembolic stroke	Olink	OID20393	P20023	CR2	Inverse variance weighted (fixed effects)	2	-0.167853	0.0823831	0.041603	0.62349
Small vessel stroke	Olink	OID20579	Q16698	DECR1	Wald ratio	1	-0.799325	0.392329	0.0416117	0.62349
Ischemic stroke	Olink	OID31101	Q6UX71	PLXDC2	Wald ratio	1	-0.209791	0.103438	0.042543	0.625462
Ischemic stroke	Olink	OID20907	P29218	IMPA1	Wald ratio	1	0.0746752	0.036865	0.0428016	0.625462
Ischemic stroke	Olink	OID20086	P21964	COMT	Inverse variance weighted (fixed effects)	2	-0.0440089	0.0217554	0.0430841	0.625462
Ischemic stroke	Olink	OID30974	P35556	FBN2	Wald ratio	1	0.04864	0.0240339	0.0429898	0.625462
Ischemic stroke	Olink	OID20356	Q99650	OSMR	Inverse variance weighted (fixed effects)	3	0.0430718	0.0212579	0.0427484	0.625462
Ischemic stroke	Olink	OID20320	Q16769	QPCT	Inverse variance weighted (fixed effects)	2	0.0388659	0.0191607	0.0425177	0.625462
Ischemic stroke	SomaScan	15367_38	Q8TDL5	BPIFB1	Inverse variance weighted (fixed effects)	2	-0.0386342	0.0190665	0.0427354	0.625462
Ischemic stroke	SomaScan	3640_14	P30533	LRPAP1	Inverse variance weighted (fixed effects)	3	-0.076272	0.0376711	0.0428997	0.625462
Ischemic stroke	SomaScan	8974_172	P39059	COL15A1	Inverse variance weighted (fixed effects)	2	0.0673339	0.0331995	0.0425439	0.625462
Ischemic stroke	SomaScan	13982_33	Q9NS28	RGS18	Wald ratio	1	-0.262774	0.129562	0.042543	0.625462
Cardioembolic stroke	Olink	OID30248	Q8WUF8	FAM172A	Wald ratio	1	0.255374	0.125594	0.0420189	0.625462
Cardioembolic stroke	Olink	OID31009	O75167	PHACTR2	Wald ratio	1	-0.165599	0.0817922	0.0429053	0.625462
Cardioembolic stroke	Olink	OID20501	Q0Z7S8	FABP9	Inverse variance weighted (fixed effects)	2	-0.349132	0.171793	0.0421247	0.625462
Cardioembolic stroke	SomaScan	12685_57	Q9NSB8	HOMER2	Wald ratio	1	-0.483023	0.238773	0.0430798	0.625462
Cardioembolic stroke	SomaScan	6434_18	O75106	AOC2	Wald ratio	1	0.696988	0.344359	0.0429687	0.625462
Large artery stroke	Olink	OID31008	O95467	GNAS	Wald ratio	1	-0.611492	0.301103	0.0422715	0.625462
Large artery stroke	Olink	OID20431	P22301	IL10	Wald ratio	1	0.427369	0.210484	0.0423153	0.625462
Large artery stroke	Olink	OID31514	Q96BQ1	FAM3D	Inverse variance weighted (fixed effects)	2	-0.137696	0.067771	0.042175	0.625462
Large artery stroke	Olink	OID31031	P51687	SUOX	Wald ratio	1	-0.839668	0.413318	0.0422011	0.625462
Large artery stroke	SomaScan	10714_7	P12821	ACE	Inverse variance weighted (fixed effects)	2	0.090415	0.04454	0.0423593	0.625462
Large artery stroke	SomaScan	7648_9	Q00872	MYBPC1	Wald ratio	1	-0.951128	0.469925	0.0429702	0.625462
Large artery stroke	SomaScan	13434_172	Q9NVD7	PARVA	Inverse variance weighted (fixed effects)	2	0.555035	0.273707	0.0425765	0.625462
Large artery stroke	SomaScan	8364_74	Q9Y2C2	UST	Inverse variance weighted (fixed effects)	2	-0.342516	0.168616	0.0422211	0.625462
Small vessel stroke	Olink	OID20907	P29218	IMPA1	Wald ratio	1	0.2141	0.105396	0.0422154	0.625462
Small vessel stroke	Olink	OID21072	P02749	APOH	Inverse variance weighted (fixed effects)	2	0.110902	0.0548113	0.0430375	0.625462
Small vessel stroke	SomaScan	3044_3	P55774	CCL18	Inverse variance weighted (fixed effects)	3	-0.0774666	0.0382374	0.042771	0.625462
Small vessel stroke	SomaScan	13545_97	Q8N9N8	EIF1AD	Wald ratio	1	0.236462	0.116563	0.042498	0.625462
Small vessel stroke	SomaScan	6617_12	Q6DN72	FCRL6	Wald ratio	1	-0.329404	0.16241	0.0425372	0.625462
Small vessel stroke	SomaScan	13130_150	P52789	HK2	Wald ratio	1	0.677273	0.333333	0.0421721	0.625462
Small vessel stroke	SomaScan	8100_15	Q7Z4H4	ADM2	Wald ratio	1	0.420805	0.208054	0.0431164	0.625462
Cardioembolic stroke	Olink	OID21381	Q7Z5L0	VMO1	Inverse variance weighted (fixed effects)	4	0.0824212	0.0407944	0.0433413	0.62603
Cardioembolic stroke	Olink	OID20181	Q8WVQ1	CANT1	Wald ratio	1	-0.247436	0.122558	0.0434935	0.62603
Cardioembolic stroke	Olink	OID30614	Q5JS37	NHLRC3	Inverse variance weighted (fixed effects)	2	-0.156498	0.0775253	0.043522	0.62603
Large artery stroke	Olink	OID30248	Q8WUF8	FAM172A	Wald ratio	1	0.332824	0.164842	0.0434823	0.62603
Large artery stroke	SomaScan	13481_24	Q15560	TCEA2	Wald ratio	1	-0.355816	0.176187	0.043432	0.62603
Large artery stroke	SomaScan	18162_167	Q9NWZ3	IRAK4	Wald ratio	1	0.590283	0.292241	0.0433988	0.62603
Small vessel stroke	Olink	OID30408	O95965	ITGBL1	Inverse variance weighted (fixed effects)	3	-0.119592	0.0591817	0.0433043	0.62603
Small vessel stroke	SomaScan	6574_11	O60667	FAIM3	Wald ratio	1	0.45082	0.223203	0.0434068	0.62603
Cardioembolic stroke	SomaScan	8890_9	Q14DG7	TMEM132B	Wald ratio	1	0.257448	0.127578	0.043595	0.62642
Ischemic stroke	SomaScan	4127_75	P13671	C6	Inverse variance weighted (fixed effects)	2	0.0714729	0.0354693	0.0438983	0.629546
Small vessel stroke	SomaScan	17832_12	Q9BXS1	IDI2	Wald ratio	1	-0.289511	0.143678	0.0439046	0.629546
Ischemic stroke	Olink	OID30250	P58107	EPPK1	Inverse variance weighted (fixed effects)	3	0.0364088	0.018079	0.0440229	0.630579
Cardioembolic stroke	Olink	OID20679	P53634	CTSC	Inverse variance weighted (fixed effects)	2	-0.0653933	0.0324955	0.0441796	0.632162
Ischemic stroke	SomaScan	11117_2	Q8TB22	SPATA20	Inverse variance weighted (fixed effects)	2	0.0469796	0.0233632	0.0443421	0.632249
Cardioembolic stroke	Olink	OID31522	Q9NPJ3	ACOT13	Wald ratio	1	-0.551459	0.274239	0.0443392	0.632249
Large artery stroke	SomaScan	19504_22	P23919	DTYMK	Wald ratio	1	-0.966463	0.480691	0.0443708	0.632249
Small vessel stroke	Olink	OID30286	P02458	COL2A1	Inverse variance weighted (fixed effects)	3	-0.0805551	0.0400422	0.0442459	0.632249
Cardioembolic stroke	Olink	OID20342	P05121	SERPINE1	Wald ratio	1	0.346609	0.172463	0.044457	0.632818
Cardioembolic stroke	Olink	OID30640	Q96AJ9	VTI1A	Wald ratio	1	-0.593676	0.295678	0.04466	0.633726
Cardioembolic stroke	SomaScan	2837_3	P08581	MET	Inverse variance weighted (fixed effects)	2	-0.228763	0.113932	0.0446538	0.633726
Large artery stroke	Olink	OID30531	Q9H3T2	SEMA6C	Wald ratio	1	-0.452701	0.225449	0.0446433	0.633726
Large artery stroke	Olink	OID21331	P15848	ARSB	Inverse variance weighted (fixed effects)	3	-0.139547	0.0695494	0.0448084	0.635174
Ischemic stroke	Olink	OID20407	Q9Y5C1	ANGPTL3	Wald ratio	1	-0.0519491	0.0259746	0.0455003	0.635748
Ischemic stroke	SomaScan	6574_11	O60667	FAIM3	Wald ratio	1	0.148802	0.074401	0.0455003	0.635748
Ischemic stroke	SomaScan	10346_5	P40763	STAT3	Wald ratio	1	-0.0973394	0.0486697	0.0455003	0.635748
Cardioembolic stroke	Olink	OID31066	Q92859	NEO1	Wald ratio	1	0.466027	0.232576	0.0450958	0.635748
Cardioembolic stroke	Olink	OID21337	Q14241	ELOA	Wald ratio	1	0.386865	0.193432	0.0455003	0.635748
Cardioembolic stroke	Olink	OID20130	P31949	S100A11	Wald ratio	1	-0.25464	0.127167	0.0452407	0.635748
Cardioembolic stroke	Olink	OID20081	O43854	EDIL3	Wald ratio	1	0.384029	0.192014	0.0455003	0.635748
Cardioembolic stroke	SomaScan	18381_16	P05091	ALDH2	Wald ratio	1	0.43264	0.215772	0.0449549	0.635748
Large artery stroke	Olink	OID21085	Q14112	NID2	Inverse variance weighted (fixed effects)	2	0.129948	0.0649175	0.0453121	0.635748
Large artery stroke	Olink	OID20801	P22676	CALB2	Wald ratio	1	0.740725	0.369563	0.0450348	0.635748
Large artery stroke	Olink	OID21349	Q8N9I9	DTX3	Wald ratio	1	0.461179	0.23059	0.0455003	0.635748
Small vessel stroke	Olink	OID20222	Q92692	NECTIN2	Inverse variance weighted (fixed effects)	2	-0.215074	0.107534	0.0454944	0.635748
Small vessel stroke	Olink	OID21084	P23381	WARS1	Inverse variance weighted (fixed effects)	2	0.172699	0.086277	0.0453193	0.635748
Small vessel stroke	SomaScan	12008_3	P09564	CD7	Wald ratio	1	-0.240267	0.120133	0.0455003	0.635748
Cardioembolic stroke	Olink	OID20867	Q9NRG1	PRTFDC1	Inverse variance weighted (fixed effects)	2	0.281594	0.140859	0.0455958	0.636293
Small vessel stroke	Olink	OID20731	Q9NZC2	TREM2	Inverse variance weighted (fixed effects)	2	-0.439705	0.219987	0.0456324	0.636293
Cardioembolic stroke	Olink	OID30743	P08185	SERPINA6	Inverse variance weighted (fixed effects)	2	0.139734	0.0699335	0.0457061	0.636636
Large artery stroke	Olink	OID30603	P06132	UROD	Inverse variance weighted (fixed effects)	2	0.147199	0.0736845	0.0457502	0.636636
Large artery stroke	Olink	OID30395	Q9BYJ0	FGFBP2	Inverse variance weighted (fixed effects)	2	0.0943335	0.0472867	0.0460507	0.638783
Large artery stroke	Olink	OID20704	O76096	CST7	Inverse variance weighted (fixed effects)	3	0.106096	0.0531803	0.0460409	0.638783
Large artery stroke	Olink	OID21382	Q99536	VAT1	Wald ratio	1	-0.320707	0.160709	0.0459802	0.638783
Large artery stroke	Olink	OID21454	O00292	LEFTY2	Inverse variance weighted (fixed effects)	3	-0.0929024	0.046588	0.0461382	0.638783
Small vessel stroke	Olink	OID30672	P07998	RNASE1	Inverse variance weighted (fixed effects)	2	0.205756	0.103161	0.0460968	0.638783
Ischemic stroke	Olink	OID20262	Q9NNX6	CD209	Inverse variance weighted (fixed effects)	2	-0.0426524	0.0214341	0.0465985	0.639308
Ischemic stroke	Olink	OID31451	Q6UW56	ATRAID	Wald ratio	1	-0.0577324	0.0290455	0.0468499	0.639308
Ischemic stroke	SomaScan	15440_57	P16519	PCSK2	Wald ratio	1	-0.169719	0.0854701	0.0470651	0.639308
Ischemic stroke	SomaScan	11104_13	P36222	CHI3L1	Inverse variance weighted (fixed effects)	3	-0.0260197	0.0130952	0.0469271	0.639308
Ischemic stroke	SomaScan	17513_11	P50995	ANXA11	Wald ratio	1	0.0945578	0.047619	0.0470651	0.639308
Ischemic stroke	SomaScan	2743_5	Q15465	SHH	Wald ratio	1	0.154095	0.0775862	0.047021	0.639308
Ischemic stroke	SomaScan	9916_146	Q9NT99	LRRC4B	Wald ratio	1	0.274119	0.137825	0.0467135	0.639308
Cardioembolic stroke	Olink	OID21091	Q9HCN6	GP6	Wald ratio	1	0.110747	0.055624	0.0464819	0.639308
Cardioembolic stroke	Olink	OID30765	Q08380	LGALS3BP	Wald ratio	1	0.329736	0.165588	0.0464474	0.639308
Cardioembolic stroke	Olink	OID30109	Q9UFP1	GASK1A	Inverse variance weighted (fixed effects)	3	-0.0808566	0.0406913	0.0469141	0.639308
Cardioembolic stroke	Olink	OID21081	O60462	NRP2	Inverse variance weighted (fixed effects)	3	-0.162512	0.0817545	0.0468331	0.639308
Large artery stroke	Olink	OID21294	Q9Y653	ADGRG1	Wald ratio	1	-0.62945	0.316837	0.0469593	0.639308
Large artery stroke	Olink	OID30859	Q14129	DGCR6	Wald ratio	1	-0.497425	0.250243	0.0468374	0.639308
Large artery stroke	Olink	OID20343	P43121	MCAM	Inverse variance weighted (fixed effects)	2	-0.498399	0.250558	0.0466837	0.639308
Large artery stroke	SomaScan	18175_65	Q99536	VAT1	Wald ratio	1	-0.665667	0.334333	0.0464774	0.639308
Large artery stroke	SomaScan	6081_52	Q9UKZ9	PCOLCE2	Inverse variance weighted (fixed effects)	4	-0.0958203	0.04823	0.0469519	0.639308
Small vessel stroke	Olink	OID30752	P14151	SELL	Inverse variance weighted (fixed effects)	2	-0.108182	0.0544713	0.0470287	0.639308
Small vessel stroke	Olink	OID31301	Q8TEW0	PARD3	Wald ratio	1	0.577188	0.289918	0.0464954	0.639308
Small vessel stroke	SomaScan	15584_9	P36980	CFHR2	Inverse variance weighted (fixed effects)	3	0.0555643	0.0279049	0.0464587	0.639308
Large artery stroke	SomaScan	5069_9	P08174	CD55	Inverse variance weighted (fixed effects)	2	-0.127244	0.0641174	0.0471953	0.640441
Ischemic stroke	Olink	OID30396	P39059	COL15A1	Inverse variance weighted (fixed effects)	2	0.068127	0.0343468	0.0473109	0.640628
Ischemic stroke	SomaScan	2911_27	P21741	MDK	Wald ratio	1	0.260974	0.131693	0.0475145	0.640628
Cardioembolic stroke	SomaScan	18332_17	O14810	CPLX1	Wald ratio	1	-0.586268	0.295775	0.0474633	0.640628
Cardioembolic stroke	SomaScan	5089_11	P16871	IL7R	Wald ratio	1	0.406844	0.205323	0.0475373	0.640628
Cardioembolic stroke	SomaScan	15513_108	Q16651	PRSS8	Wald ratio	1	-0.61809	0.311558	0.0472702	0.640628
Large artery stroke	Olink	OID21285	Q9Y6A5	TACC3	Wald ratio	1	-0.217471	0.109715	0.0474633	0.640628
Large artery stroke	SomaScan	3806_55	P54756	EPHA5	Inverse variance weighted (fixed effects)	2	0.393687	0.198593	0.0474372	0.640628
Ischemic stroke	SomaScan	8297_8	Q8IXB1	DNAJC10	Wald ratio	1	0.238911	0.120623	0.0476311	0.64126
Cardioembolic stroke	SomaScan	13669_6	P22607	FGFR3	Inverse variance weighted (fixed effects)	2	-0.20571	0.103905	0.0477283	0.641937
Ischemic stroke	Olink	OID20072	Q6UWL2	SUSD1	Wald ratio	1	-0.123163	0.0622977	0.0480403	0.642435
Ischemic stroke	Olink	OID20326	P19957	PI3	Wald ratio	1	0.0503553	0.0254606	0.0479538	0.642435
Ischemic stroke	SomaScan	18916_25	Q9BY32	ITPA	Inverse variance weighted (fixed effects)	4	-0.0299937	0.0151665	0.0479712	0.642435
Cardioembolic stroke	Olink	OID30265	P21754	ZP3	Inverse variance weighted (fixed effects)	3	0.0526206	0.0266052	0.0479473	0.642435
Cardioembolic stroke	SomaScan	2950_57	P22692	IGFBP4	Wald ratio	1	-0.625899	0.316547	0.0480108	0.642435
Small vessel stroke	SomaScan	6947_4	Q9Y274	ST3GAL6	Inverse variance weighted (fixed effects)	3	-0.106216	0.0537273	0.0480474	0.642435
Ischemic stroke	Olink	OID21194	P50749	RASSF2	Inverse variance weighted (fixed effects)	2	-0.137783	0.0697618	0.0482627	0.642798
Large artery stroke	Olink	OID20714	P34896	SHMT1	Inverse variance weighted (fixed effects)	2	-0.109242	0.0552989	0.0482131	0.642798
Large artery stroke	Olink	OID21132	P22749	GNLY	Inverse variance weighted (fixed effects)	2	-0.145591	0.0737129	0.0482564	0.642798
Large artery stroke	SomaScan	12685_57	Q9NSB8	HOMER2	Wald ratio	1	-0.627601	0.317634	0.0481704	0.642798
Ischemic stroke	Olink	OID20131	Q9H7M9	VSIR	Inverse variance weighted (fixed effects)	2	-0.0439469	0.0222805	0.0485597	0.644217
Ischemic stroke	Olink	OID21401	Q9ULX7	CA14	Inverse variance weighted (fixed effects)	2	0.0763025	0.0386656	0.0484505	0.644217
Ischemic stroke	Olink	OID20501	Q0Z7S8	FABP9	Inverse variance weighted (fixed effects)	2	-0.148226	0.0752721	0.0489293	0.644217
Ischemic stroke	Olink	OID21417	Q16790	CA9	Inverse variance weighted (fixed effects)	2	0.103609	0.0525783	0.0487741	0.644217
Cardioembolic stroke	Olink	OID20733	O75888	TNFSF13	Inverse variance weighted (fixed effects)	2	0.0994474	0.0504761	0.0488167	0.644217
Cardioembolic stroke	SomaScan	13929_27	Q9UKG9	CROT	Inverse variance weighted (fixed effects)	2	-0.097431	0.0494669	0.048882	0.644217
Cardioembolic stroke	SomaScan	13125_45	P04004	VTN	Inverse variance weighted (fixed effects)	2	-0.0661762	0.0335764	0.0487335	0.644217
Cardioembolic stroke	SomaScan	5631_83	P12872	MLN	Inverse variance weighted (fixed effects)	2	0.330565	0.167871	0.0489351	0.644217
Large artery stroke	Olink	OID30635	P52758	RIDA	Wald ratio	1	0.157789	0.0800524	0.0487154	0.644217
Large artery stroke	SomaScan	15391_114	Q14393	GAS6	Inverse variance weighted (fixed effects)	2	-0.2118	0.107538	0.048891	0.644217
Large artery stroke	SomaScan	5742_14	Q9NPH0	ACP6	Inverse variance weighted (fixed effects)	3	0.12452	0.0631281	0.0485524	0.644217
Small vessel stroke	Olink	OID20869	Q13426	XRCC4	Wald ratio	1	0.587961	0.298354	0.04876	0.644217
Large artery stroke	Olink	OID20736	Q9UJA9	ENPP5	Inverse variance weighted (fixed effects)	4	-0.14083	0.0715533	0.0490469	0.645068
Ischemic stroke	SomaScan	7957_2	Q8WXD2	SCG3	Wald ratio	1	0.0393159	0.0199911	0.0492217	0.645307
Ischemic stroke	SomaScan	19161_1	Q9Y4E8	USP15	Wald ratio	1	-0.117117	0.0595596	0.049254	0.645307
Cardioembolic stroke	SomaScan	5451_1	Q13740	ALCAM	Inverse variance weighted (fixed effects)	3	0.281573	0.143149	0.0491843	0.645307
Large artery stroke	Olink	OID31126	Q13938	CAPS	Wald ratio	1	-0.377324	0.191774	0.0491197	0.645307
Cardioembolic stroke	Olink	OID20596	P08727	KRT19	Wald ratio	1	0.232474	0.118276	0.0493544	0.645788
Large artery stroke	SomaScan	6617_12	Q6DN72	FCRL6	Wald ratio	1	-0.333333	0.169614	0.0493852	0.645788
Small vessel stroke	Olink	OID21259	P55789	GFER	Wald ratio	1	-0.630862	0.321166	0.049497	0.646631
Ischemic stroke	SomaScan	4990_87	P07359	GP1BA	Inverse variance weighted (fixed effects)	2	-0.0908434	0.0462669	0.0495925	0.646805
Cardioembolic stroke	Olink	OID30889	Q8IY33	MICALL2	Wald ratio	1	-0.544078	0.277117	0.0496054	0.646805
Small vessel stroke	SomaScan	3206_4	Q9Y5Y7	LYVE1	Inverse variance weighted (fixed effects)	3	0.19846	0.101103	0.0496523	0.646805
Ischemic stroke	Olink	OID21291	Q9UKR3	KLK13	Wald ratio	1	0.0354724	0.018084	0.0498162	0.647346
Ischemic stroke	SomaScan	11347_9	P37837	TALDO1	Wald ratio	1	-0.224802	0.114625	0.0498549	0.647346
Cardioembolic stroke	Olink	OID20274	P14555	PLA2G2A	Inverse variance weighted (fixed effects)	2	-0.0726902	0.0370686	0.0498833	0.647346
Small vessel stroke	Olink	OID20477	Q9P0M4	IL17C	Wald ratio	1	-0.344707	0.175684	0.0497526	0.647346
Ischemic stroke	SomaScan	2602_2	O15123	ANGPT2	Wald ratio	1	-0.112385	0.0573394	0.0499958	0.647453
Ischemic stroke	SomaScan	11308_8	Q8TEY5	CREB3L4	Wald ratio	1	-0.0677711	0.0346386	0.0504037	0.647453
Ischemic stroke	SomaScan	11266_8	Q14242	SELPLG	Inverse variance weighted (fixed effects)	2	-0.057082	0.0291662	0.0503319	0.647453
Cardioembolic stroke	Olink	OID21252	Q9UHF1	EGFL7	Inverse variance weighted (fixed effects)	2	-0.318931	0.162951	0.0503224	0.647453
Cardioembolic stroke	Olink	OID20433	O95379	TNFAIP8	Wald ratio	1	-0.38312	0.195636	0.0501909	0.647453
Cardioembolic stroke	SomaScan	4929_55	P04278	SHBG	Inverse variance weighted (fixed effects)	2	-0.186034	0.0949382	0.0500516	0.647453
Large artery stroke	Olink	OID21527	P26842	CD27	Inverse variance weighted (fixed effects)	2	-0.168306	0.0859055	0.0500894	0.647453
Large artery stroke	SomaScan	10511_10	P12111	COL6A3	Wald ratio	1	-0.3897	0.199078	0.0502853	0.647453
Small vessel stroke	Olink	OID20751	Q6UXH1	CRELD2	Inverse variance weighted (fixed effects)	2	0.132602	0.0677769	0.0504127	0.647453
Small vessel stroke	Olink	OID31044	Q9BUP0	EFHD1	Inverse variance weighted (fixed effects)	2	0.210775	0.107574	0.0500722	0.647453
Small vessel stroke	Olink	OID30464	Q9NZS2	KLRF1	Inverse variance weighted (fixed effects)	2	0.190142	0.0971503	0.0503251	0.647453
Large artery stroke	SomaScan	9385_4	P10253	GAA	Inverse variance weighted (fixed effects)	4	0.137431	0.0702719	0.0504998	0.647454
Large artery stroke	SomaScan	9183_7	P17181	IFNAR1	Inverse variance weighted (fixed effects)	3	-0.0891426	0.0455823	0.0505075	0.647454
Cardioembolic stroke	SomaScan	5834_18	P15248	IL9	Wald ratio	1	0.404206	0.206776	0.0506064	0.648113
Cardioembolic stroke	SomaScan	7244_16	Q9H665	IGFLR1	Inverse variance weighted (fixed effects)	2	0.075476	0.0386278	0.0507095	0.648219
Large artery stroke	Olink	OID21222	Q9UQQ2	SH2B3	Wald ratio	1	0.630053	0.322439	0.0506985	0.648219
Ischemic stroke	Olink	OID31301	Q8TEW0	PARD3	Wald ratio	1	0.206517	0.105906	0.0511761	0.649927
Ischemic stroke	SomaScan	18934_50	P21980	TGM2	Wald ratio	1	-0.0889878	0.0456062	0.0510309	0.649927
Cardioembolic stroke	Olink	OID20173	Q14956	GPNMB	Inverse variance weighted (fixed effects)	2	-0.10438	0.0535002	0.0510554	0.649927
Cardioembolic stroke	SomaScan	7218_87	P14415	ATP1B2	Inverse variance weighted (fixed effects)	2	0.104969	0.0537967	0.0510324	0.649927
Cardioembolic stroke	SomaScan	12016_60	P22681	CBL	Wald ratio	1	-0.247836	0.127065	0.0511208	0.649927
Cardioembolic stroke	SomaScan	19135_5	Q969T7	NT5C3L	Inverse variance weighted (fixed effects)	2	-0.107073	0.0549032	0.0511497	0.649927
Large artery stroke	SomaScan	12637_7	P43155	CRAT	Wald ratio	1	0.535991	0.27464	0.0509842	0.649927
Cardioembolic stroke	SomaScan	7110_2	Q9UBS4	DNAJB11	Wald ratio	1	-0.245323	0.12585	0.0512567	0.65033
Large artery stroke	Olink	OID30787	P02751	FN1	Wald ratio	1	-0.109087	0.0559725	0.051303	0.65033
Ischemic stroke	SomaScan	8043_153	P49747	COMP	Inverse variance weighted (fixed effects)	2	-0.0895823	0.0460035	0.0514998	0.651727
Small vessel stroke	SomaScan	15613_16	P16233	PNLIP	Wald ratio	1	0.762144	0.391401	0.0515086	0.651727
Ischemic stroke	Olink	OID21448	P80303	NUCB2	Inverse variance weighted (fixed effects)	3	-0.0426881	0.021945	0.0517471	0.652093
Ischemic stroke	SomaScan	8100_15	Q7Z4H4	ADM2	Wald ratio	1	0.138255	0.0711409	0.0519683	0.652093
Cardioembolic stroke	Olink	OID21291	Q9UKR3	KLK13	Wald ratio	1	0.0820734	0.042196	0.0517684	0.652093
Cardioembolic stroke	Olink	OID20774	Q14118	DAG1	Wald ratio	1	-0.57569	0.296261	0.0519942	0.652093
Cardioembolic stroke	Olink	OID21439	P39900	MMP12	Inverse variance weighted (fixed effects)	3	-0.0668253	0.0343997	0.0520631	0.652093
Cardioembolic stroke	SomaScan	7822_11	Q9NWW9	HRASLS2	Wald ratio	1	-0.703065	0.362069	0.0521614	0.652093
Cardioembolic stroke	SomaScan	2974_61	Q12860	CNTN1	Inverse variance weighted (fixed effects)	2	0.120305	0.0619669	0.0522056	0.652093
Cardioembolic stroke	SomaScan	3320_49	Q16270	IGFBP7	Inverse variance weighted (fixed effects)	2	-0.114606	0.0588997	0.0516819	0.652093
Large artery stroke	Olink	OID20355	P18428	LBP	Inverse variance weighted (fixed effects)	3	-0.0781776	0.0402151	0.0518971	0.652093
Large artery stroke	Olink	OID21500	Q9UBX1	CTSF	Wald ratio	1	-0.220296	0.113374	0.0520054	0.652093
Large artery stroke	Olink	OID20501	Q0Z7S8	FABP9	Inverse variance weighted (fixed effects)	2	-0.453737	0.233642	0.052135	0.652093
Large artery stroke	SomaScan	11266_8	Q14242	SELPLG	Inverse variance weighted (fixed effects)	2	-0.174566	0.089803	0.051911	0.652093
Large artery stroke	SomaScan	4133_54	P10144	GZMB	Wald ratio	1	0.48183	0.24812	0.0521469	0.652093
Small vessel stroke	SomaScan	16599_38	Q9HCN4	GPN1	Wald ratio	1	0.553435	0.284987	0.0521414	0.652093
Cardioembolic stroke	Olink	OID30543	P09564	CD7	Inverse variance weighted (fixed effects)	2	-0.0850334	0.0438389	0.0524186	0.654155
Small vessel stroke	Olink	OID21494	Q92832	NELL1	Inverse variance weighted (fixed effects)	3	-0.134335	0.0692865	0.0525209	0.654834
Cardioembolic stroke	Olink	OID31096	Q8IXS6	PALM2AKAP2	Inverse variance weighted (fixed effects)	2	-0.150655	0.0777802	0.0527541	0.656544
Large artery stroke	SomaScan	2681_23	P14210	HGF	Wald ratio	1	0.392063	0.202381	0.0527142	0.656544
Ischemic stroke	SomaScan	12395_86	Q6PI48	DARS2	Wald ratio	1	0.176148	0.091024	0.0529676	0.657133
Cardioembolic stroke	SomaScan	11441_11	P06737	PYGL	Wald ratio	1	-0.295193	0.15256	0.0529987	0.657133
Cardioembolic stroke	SomaScan	11287_14	P00167	CYB5A	Wald ratio	1	-0.408284	0.211045	0.0530419	0.657133
Large artery stroke	Olink	OID30666	P01210	PENK	Inverse variance weighted (fixed effects)	2	0.13215	0.068292	0.052981	0.657133
Large artery stroke	SomaScan	14747_9	O75462	CRLF1	Wald ratio	1	-0.202273	0.104545	0.053017	0.657133
Ischemic stroke	SomaScan	3290_50	Q6YHK3	CD109	Inverse variance weighted (fixed effects)	3	0.0384867	0.0199064	0.0531891	0.65717
Cardioembolic stroke	SomaScan	10346_5	P40763	STAT3	Wald ratio	1	-0.209604	0.108371	0.0530969	0.65717
Large artery stroke	SomaScan	12656_1	Q07866	KLC1	Wald ratio	1	0.493228	0.255079	0.0531588	0.65717
Cardioembolic stroke	Olink	OID20558	P11274	BCR	Wald ratio	1	-0.551206	0.285184	0.0532601	0.657451
Ischemic stroke	SomaScan	5581_28	Q08830	FGL1	Inverse variance weighted (fixed effects)	4	0.0369887	0.0191419	0.053317	0.65756
Ischemic stroke	SomaScan	3132_1	P49767	VEGFC	Wald ratio	1	0.123267	0.0638614	0.053578	0.657811
Cardioembolic stroke	Olink	OID30327	Q96FZ7	CHMP6	Wald ratio	1	0.205584	0.106489	0.053538	0.657811
Cardioembolic stroke	SomaScan	8885_6	Q8IZS8	CACNA2D3	Inverse variance weighted (fixed effects)	3	-0.127209	0.0658908	0.053533	0.657811
Large artery stroke	SomaScan	5018_68	P30041	PRDX6	Wald ratio	1	-0.429153	0.222313	0.0535569	0.657811
Small vessel stroke	SomaScan	11643_73	Q8TDB6	DTX3L	Wald ratio	1	-0.755725	0.391221	0.0533956	0.657811
Ischemic stroke	Olink	OID21212	O00221	NFKBIE	Wald ratio	1	-0.062378	0.0323371	0.0537316	0.658397
Ischemic stroke	Olink	OID30957	O14967	CLGN	Inverse variance weighted (fixed effects)	2	-0.0307686	0.015966	0.053963	0.658397
Cardioembolic stroke	Olink	OID30485	P16671	CD36	Inverse variance weighted (fixed effects)	2	0.114303	0.0592635	0.053765	0.658397
Cardioembolic stroke	SomaScan	10892_8	Q99650	OSMR	Wald ratio	1	-0.274849	0.14261	0.0539457	0.658397
Large artery stroke	Olink	OID20137	Q03154	ACY1	Wald ratio	1	-0.795391	0.412666	0.0539242	0.658397
Large artery stroke	Olink	OID20626	P35613	BSG	Wald ratio	1	-0.533543	0.276713	0.0538373	0.658397
Small vessel stroke	Olink	OID20498	Q13261	IL15RA	Inverse variance weighted (fixed effects)	2	0.153452	0.0795797	0.0538208	0.658397
Cardioembolic stroke	Olink	OID20810	P08758	ANXA5	Wald ratio	1	0.292117	0.151627	0.0540353	0.658691
Cardioembolic stroke	Olink	OID20300	Q9Y4L1	HYOU1	Wald ratio	1	0.170096	0.088319	0.0541136	0.659058
Large artery stroke	Olink	OID30746	P05090	APOD	Inverse variance weighted (fixed effects)	2	-0.389875	0.202483	0.0541702	0.659159
Cardioembolic stroke	SomaScan	17164_15	P09525	ANXA4	Wald ratio	1	0.132476	0.0688456	0.0543242	0.66015
Small vessel stroke	SomaScan	13973_62	Q8NG68	TTL	Wald ratio	1	0.757161	0.393524	0.0543482	0.66015
Large artery stroke	Olink	OID20618	P68106	FKBP1B	Inverse variance weighted (fixed effects)	2	-0.185204	0.0962782	0.0544	0.660192
Ischemic stroke	Olink	OID21030	Q99731	CCL19	Wald ratio	1	-0.186287	0.0969453	0.0546601	0.661093
Cardioembolic stroke	Olink	OID21290	Q7L5N7	LPCAT2	Wald ratio	1	-0.291863	0.151864	0.0546215	0.661093
Cardioembolic stroke	Olink	OID31315	Q9ULD2	MTUS1	Inverse variance weighted (fixed effects)	2	0.181486	0.0944497	0.0546678	0.661093
Large artery stroke	SomaScan	17756_69	P32321	DCTD	Wald ratio	1	0.897163	0.466903	0.0546663	0.661093
Ischemic stroke	Olink	OID31475	Q99733	NAP1L4	Wald ratio	1	0.0629015	0.032785	0.0550344	0.661137
Ischemic stroke	Olink	OID21022	Q9UNZ2	NSFL1C	Wald ratio	1	-0.182727	0.0951184	0.0547251	0.661137
Ischemic stroke	Olink	OID20860	P13647	KRT5	Wald ratio	1	0.139947	0.0729301	0.0549946	0.661137
Ischemic stroke	Olink	OID30641	P21854	CD72	Wald ratio	1	0.0991724	0.0516898	0.0550344	0.661137
Ischemic stroke	SomaScan	13519_112	Q86VW2	ARHGEF25	Wald ratio	1	0.129425	0.0674779	0.0551069	0.661137
Large artery stroke	Olink	OID30226	Q8WZ75	ROBO4	Wald ratio	1	0.467132	0.243217	0.0547777	0.661137
Large artery stroke	SomaScan	9321_400	P08949	NMB	Inverse variance weighted (fixed effects)	2	-0.287091	0.14968	0.0551065	0.661137
Small vessel stroke	Olink	OID30785	P00747	PLG	Inverse variance weighted (fixed effects)	3	0.139228	0.0725549	0.0549931	0.661137
Small vessel stroke	SomaScan	6557_50	Q8TF66	LRRC15	Inverse variance weighted (fixed effects)	2	0.132907	0.0692596	0.0549891	0.661137
Cardioembolic stroke	Olink	OID20839	P30039	PBLD	Inverse variance weighted (fixed effects)	2	0.0957987	0.0499667	0.0552061	0.661747
Ischemic stroke	SomaScan	10714_7	P12821	ACE	Inverse variance weighted (fixed effects)	3	0.0271842	0.0141892	0.055385	0.66331
Cardioembolic stroke	SomaScan	3580_25	P01009	SERPINA1	Inverse variance weighted (fixed effects)	3	0.0816602	0.0426401	0.0554792	0.663856
Cardioembolic stroke	Olink	OID21215	P31994	FCGR2B	Inverse variance weighted (fixed effects)	2	0.077187	0.0403224	0.0555889	0.664006
Small vessel stroke	SomaScan	13044_5	Q99816	TSG101	Wald ratio	1	-0.288527	0.150713	0.0555672	0.664006
Ischemic stroke	Olink	OID31452	Q96K21	ZFYVE19	Inverse variance weighted (fixed effects)	2	-0.0444784	0.023248	0.05572	0.664987
Ischemic stroke	SomaScan	9321_400	P08949	NMB	Inverse variance weighted (fixed effects)	2	-0.0958997	0.0501433	0.0558103	0.664987
Small vessel stroke	SomaScan	4964_67	Q9NZ08	ERAP1	Inverse variance weighted (fixed effects)	3	-0.0789956	0.0413057	0.055817	0.664987
Ischemic stroke	Olink	OID30726	P35542	SAA4	Inverse variance weighted (fixed effects)	3	-0.0427805	0.0224235	0.0564119	0.66569
Ischemic stroke	Olink	OID30598	P55083	MFAP4	Inverse variance weighted (fixed effects)	2	0.0746715	0.0390971	0.0561462	0.66569
Ischemic stroke	Olink	OID31042	Q8IWQ3	BRSK2	Inverse variance weighted (fixed effects)	4	-0.0396609	0.0207802	0.056315	0.66569
Ischemic stroke	SomaScan	13450_49	P40818	USP8	Wald ratio	1	0.183874	0.0963618	0.0563701	0.66569
Cardioembolic stroke	Olink	OID30509	P17050	NAGA	Wald ratio	1	-0.219286	0.114799	0.0561101	0.66569
Cardioembolic stroke	Olink	OID20964	O95407	TNFRSF6B	Inverse variance weighted (fixed effects)	2	-0.107009	0.0560378	0.0561866	0.66569
Cardioembolic stroke	SomaScan	2864_2	Q02750	MAP2K1	Wald ratio	1	0.505348	0.264706	0.0562504	0.66569
Large artery stroke	Olink	OID30723	P00734	F2	Wald ratio	1	0.430676	0.225544	0.0561973	0.66569
Large artery stroke	SomaScan	3367_8	Q9UGM5	FETUB	Inverse variance weighted (fixed effects)	2	0.184899	0.096739	0.0559633	0.66569
Small vessel stroke	Olink	OID20539	Q6ZMH5	SLC39A5	Wald ratio	1	0.712983	0.373619	0.0563504	0.66569
Small vessel stroke	SomaScan	4133_54	P10144	GZMB	Wald ratio	1	0.440476	0.230576	0.0560912	0.66569
Ischemic stroke	Olink	OID30815	Q14894	CRYM	Inverse variance weighted (fixed effects)	2	0.0389688	0.020438	0.0565618	0.666883
Small vessel stroke	Olink	OID21439	P39900	MMP12	Inverse variance weighted (fixed effects)	3	-0.0832321	0.0436651	0.0566314	0.667127
Ischemic stroke	SomaScan	11152_46	Q9UKR3	KLK13	Inverse variance weighted (fixed effects)	2	0.0348693	0.0183174	0.0569602	0.668122
Ischemic stroke	SomaScan	13669_6	P22607	FGFR3	Inverse variance weighted (fixed effects)	2	-0.0876221	0.0460037	0.0568222	0.668122
Cardioembolic stroke	Olink	OID21159	P28799	GRN	Wald ratio	1	0.228912	0.120249	0.0569552	0.668122
Cardioembolic stroke	SomaScan	4992_49	P28799	GRN	Wald ratio	1	0.263206	0.138264	0.0569552	0.668122
Small vessel stroke	SomaScan	15343_337	P01042	KNG1	Inverse variance weighted (fixed effects)	3	0.0998939	0.0524609	0.0568897	0.668122
Ischemic stroke	SomaScan	2797_56	P04114	APOB	Wald ratio	1	0.202517	0.106407	0.0570111	0.668145
Ischemic stroke	Olink	OID30763	P05154	SERPINA5	Inverse variance weighted (fixed effects)	2	-0.0602714	0.031726	0.057466	0.670455
Ischemic stroke	SomaScan	18841_1	Q9UIV8	SERPINB13	Inverse variance weighted (fixed effects)	2	0.0875278	0.046065	0.0574208	0.670455
Ischemic stroke	SomaScan	2590_69	Q01973	ROR1	Inverse variance weighted (fixed effects)	2	-0.0539155	0.0283688	0.0573652	0.670455
Cardioembolic stroke	Olink	OID30732	P10909	CLU	Wald ratio	1	-0.322748	0.169868	0.0574331	0.670455
Large artery stroke	Olink	OID30727	P02649	APOE	Inverse variance weighted (fixed effects)	3	-0.070384	0.0370576	0.0575232	0.670455
Small vessel stroke	Olink	OID21337	Q14241	ELOA	Wald ratio	1	0.460721	0.24267	0.0576236	0.670455
Small vessel stroke	Olink	OID30326	Q6NUS6	TCTN3	Inverse variance weighted (fixed effects)	3	0.0716029	0.0377185	0.0576498	0.670455
Small vessel stroke	SomaScan	15391_114	Q14393	GAS6	Inverse variance weighted (fixed effects)	2	-0.169615	0.0893152	0.0575564	0.670455
Small vessel stroke	SomaScan	5581_28	Q08830	FGL1	Inverse variance weighted (fixed effects)	4	0.108607	0.0571657	0.0574502	0.670455
Large artery stroke	SomaScan	12635_9	O14717	TRDMT1	Inverse variance weighted (fixed effects)	3	-0.130062	0.068558	0.0578135	0.671216
Small vessel stroke	Olink	OID30253	P0DPI2	GATD3	Wald ratio	1	0.462201	0.243603	0.0577816	0.671216
Ischemic stroke	Olink	OID31306	Q96F10	SAT2	Inverse variance weighted (fixed effects)	2	-0.0428302	0.0225899	0.0579614	0.671667
Ischemic stroke	SomaScan	2925_9	P05121	SERPINE1	Wald ratio	1	0.210169	0.111017	0.0583406	0.671667
Ischemic stroke	SomaScan	8866_53	Q9NXS2	QPCTL	Inverse variance weighted (fixed effects)	3	0.053242	0.0281167	0.0582767	0.671667
Cardioembolic stroke	Olink	OID20341	P20062	TCN2	Inverse variance weighted (fixed effects)	3	-0.0867968	0.0458579	0.058393	0.671667
Cardioembolic stroke	Olink	OID21160	Q99497	PARK7	Wald ratio	1	-0.195138	0.103083	0.0583548	0.671667
Cardioembolic stroke	SomaScan	9126_171	Q86UY8	NT5DC3	Wald ratio	1	0.182198	0.0961768	0.0581706	0.671667
Cardioembolic stroke	SomaScan	14067_6	Q99959	PKP2	Wald ratio	1	0.357613	0.188889	0.0583251	0.671667
Cardioembolic stroke	SomaScan	6609_22	P09543	CNP	Wald ratio	1	0.442236	0.23354	0.0582759	0.671667
Cardioembolic stroke	SomaScan	4496_60	P39900	MMP12	Inverse variance weighted (fixed effects)	3	-0.0713429	0.0376215	0.0579159	0.671667
Large artery stroke	Olink	OID20327	Q9HD89	RETN	Inverse variance weighted (fixed effects)	2	-0.314337	0.166006	0.058288	0.671667
Large artery stroke	Olink	OID30259	Q92835	INPP5D	Wald ratio	1	-0.273016	0.144092	0.0581273	0.671667
Ischemic stroke	Olink	OID20799	P53985	SLC16A1	Wald ratio	1	-0.226262	0.119596	0.0585054	0.672263
Large artery stroke	Olink	OID20665	P48023	FASLG	Wald ratio	1	0.544246	0.287716	0.0585432	0.672263
Ischemic stroke	Olink	OID21143	P07108	DBI	Inverse variance weighted (fixed effects)	2	-0.0508558	0.026909	0.0587689	0.673723
Cardioembolic stroke	Olink	OID20877	P61244	MAX	Wald ratio	1	0.395274	0.209113	0.0587253	0.673723
Large artery stroke	Olink	OID20663	P12544	GZMA	Wald ratio	1	0.709923	0.375757	0.0588499	0.674085
Ischemic stroke	Olink	OID30164	Q03013	GSTM4	Inverse variance weighted (fixed effects)	3	-0.0574347	0.0304341	0.059136	0.675909
Large artery stroke	Olink	OID20845	Q96PP9	GBP4	Inverse variance weighted (fixed effects)	3	0.0904673	0.0479419	0.0591575	0.675909
Large artery stroke	SomaScan	8974_172	P39059	COL15A1	Inverse variance weighted (fixed effects)	2	0.182276	0.0965743	0.0591038	0.675909
Cardioembolic stroke	SomaScan	12687_2	Q16698	DECR1	Wald ratio	1	0.479532	0.254386	0.0594221	0.677955
Small vessel stroke	SomaScan	4131_72	P02751	FN1	Wald ratio	1	-0.242045	0.128409	0.0594358	0.677955
Ischemic stroke	Olink	OID30430	Q04609	FOLH1	Wald ratio	1	-0.16334	0.0871148	0.0607927	0.68128
Ischemic stroke	Olink	OID20321	O00584	RNASET2	Inverse variance weighted (fixed effects)	2	-0.0397046	0.0212882	0.0621681	0.68128
Ischemic stroke	Olink	OID31493	O43653	PSCA	Inverse variance weighted (fixed effects)	3	0.0170568	0.00909757	0.0608101	0.68128
Ischemic stroke	Olink	OID21498	P21589	NT5E	Inverse variance weighted (fixed effects)	3	0.0383869	0.0204052	0.0599404	0.68128
Ischemic stroke	SomaScan	6049_64	Q13332	PTPRS	Wald ratio	1	-0.161209	0.0861461	0.0612973	0.68128
Ischemic stroke	SomaScan	14131_37	P52799	EFNB2	Wald ratio	1	0.207237	0.110746	0.0613053	0.68128
Ischemic stroke	SomaScan	2982_82	P56470	LGALS4	Wald ratio	1	-0.253283	0.135084	0.0607927	0.68128
Ischemic stroke	SomaScan	14133_93	P27930	IL1R2	Inverse variance weighted (fixed effects)	3	0.0304381	0.0162968	0.0617984	0.68128
Ischemic stroke	SomaScan	15391_114	Q14393	GAS6	Inverse variance weighted (fixed effects)	2	-0.0569141	0.0303888	0.0610869	0.68128
Ischemic stroke	SomaScan	13481_24	Q15560	TCEA2	Wald ratio	1	-0.107364	0.0571232	0.0601738	0.68128
Ischemic stroke	SomaScan	18382_109	P21964	COMT	Wald ratio	1	-0.164234	0.0875912	0.0607927	0.68128
Ischemic stroke	SomaScan	3376_49	Q8NFM7	IL17RD	Inverse variance weighted (fixed effects)	4	0.0402829	0.0214608	0.0605126	0.68128
Ischemic stroke	SomaScan	11313_100	P61457	PCBD1	Inverse variance weighted (fixed effects)	3	0.0970396	0.0520533	0.0622887	0.68128
Cardioembolic stroke	Olink	OID21460	P32926	DSG3	Wald ratio	1	-0.124192	0.0663223	0.0611307	0.68128
Cardioembolic stroke	Olink	OID21398	P47992	XCL1	Inverse variance weighted (fixed effects)	2	0.0782037	0.0417133	0.0608213	0.68128
Cardioembolic stroke	Olink	OID20657	Q12866	MERTK	Wald ratio	1	0.117456	0.0624927	0.0601738	0.68128
Cardioembolic stroke	Olink	OID20083	P21246	PTN	Inverse variance weighted (fixed effects)	2	-0.181537	0.0965644	0.0601132	0.68128
Cardioembolic stroke	SomaScan	19372_7	Q7Z553	MDGA2	Inverse variance weighted (fixed effects)	2	0.0672238	0.0357786	0.0602606	0.68128
Cardioembolic stroke	SomaScan	12436_84	P78417	GSTO1	Inverse variance weighted (fixed effects)	3	-0.0746898	0.039918	0.0613337	0.68128
Cardioembolic stroke	SomaScan	4249_64	P22392	NME2	Wald ratio	1	-0.230704	0.123439	0.0616276	0.68128
Cardioembolic stroke	SomaScan	16605_2	P0C862	C1QTNF9	Wald ratio	1	0.160287	0.0851675	0.059833	0.68128
Cardioembolic stroke	SomaScan	11152_46	Q9UKR3	KLK13	Inverse variance weighted (fixed effects)	2	0.0799703	0.0427105	0.0611542	0.68128
Cardioembolic stroke	SomaScan	15506_34	Q9Y561	LRP12	Wald ratio	1	-0.570946	0.304054	0.0604116	0.68128
Cardioembolic stroke	SomaScan	11140_56	P02452	COL1A1	Wald ratio	1	0.371646	0.19878	0.061535	0.68128
Cardioembolic stroke	SomaScan	13465_5	P53805	RCAN1	Wald ratio	1	-0.591912	0.317555	0.0623266	0.68128
Large artery stroke	Olink	OID21438	P35052	GPC1	Inverse variance weighted (fixed effects)	2	-0.132237	0.0703237	0.0600536	0.68128
Large artery stroke	Olink	OID30233	P01225	FSHB	Wald ratio	1	0.39632	0.211779	0.0612921	0.68128
Large artery stroke	Olink	OID31320	Q495A1	TIGIT	Wald ratio	1	0.471827	0.252202	0.0613682	0.68128
Large artery stroke	Olink	OID31043	O94830	DDHD2	Wald ratio	1	-0.42695	0.228625	0.061836	0.68128
Large artery stroke	Olink	OID30505	Q9UIK4	DAPK2	Inverse variance weighted (fixed effects)	2	0.124256	0.0664298	0.0614155	0.68128
Large artery stroke	Olink	OID20321	O00584	RNASET2	Inverse variance weighted (fixed effects)	2	-0.132722	0.0705173	0.0598205	0.68128
Large artery stroke	Olink	OID20407	Q9Y5C1	ANGPTL3	Wald ratio	1	-0.143726	0.0768847	0.0615714	0.68128
Large artery stroke	Olink	OID21207	P07332	FES	Wald ratio	1	-0.312754	0.166902	0.0609478	0.68128
Large artery stroke	Olink	OID21448	P80303	NUCB2	Inverse variance weighted (fixed effects)	3	-0.124925	0.0669497	0.0620478	0.68128
Large artery stroke	Olink	OID30210	Q96ID5	IGSF21	Inverse variance weighted (fixed effects)	2	0.266726	0.142656	0.0615228	0.68128
Large artery stroke	SomaScan	3605_77	P48740	MASP1	Wald ratio	1	-0.509091	0.271515	0.0607927	0.68128
Large artery stroke	SomaScan	7871_16	Q24JP5	TMEM132A	Inverse variance weighted (fixed effects)	2	-0.118044	0.0632377	0.0619484	0.68128
Large artery stroke	SomaScan	9212_22	Q9UBX1	CTSF	Wald ratio	1	-0.232899	0.124864	0.0621509	0.68128
Large artery stroke	SomaScan	10499_1	Q96A25	TMEM106A	Wald ratio	1	-0.710392	0.378194	0.0603294	0.68128
Large artery stroke	SomaScan	4278_14	P07237	P4HB	Wald ratio	1	0.358995	0.191673	0.0610752	0.68128
Large artery stroke	SomaScan	11568_2	P68106	FKBP1B	Inverse variance weighted (fixed effects)	2	-0.181891	0.0969963	0.06076	0.68128
Small vessel stroke	Olink	OID20215	P20711	DDC	Inverse variance weighted (fixed effects)	2	-0.138907	0.0744118	0.0619393	0.68128
Small vessel stroke	Olink	OID21121	Q99972	MYOC	Inverse variance weighted (fixed effects)	2	0.132081	0.0708014	0.06211	0.68128
Small vessel stroke	Olink	OID20584	P01730	CD4	Wald ratio	1	-0.13738	0.0736957	0.0623005	0.68128
Small vessel stroke	Olink	OID20338	O75594	PGLYRP1	Wald ratio	1	-0.140865	0.0754872	0.0620314	0.68128
Small vessel stroke	Olink	OID20823	Q9BXS1	IDI2	Inverse variance weighted (fixed effects)	2	-0.111332	0.0597386	0.0623696	0.68128
Small vessel stroke	SomaScan	14205_6	Q96MH2	HEXIM2	Wald ratio	1	0.481069	0.257238	0.0614658	0.68128
Small vessel stroke	SomaScan	16621_77	Q8NCW5	APOA1BP	Wald ratio	1	-0.221953	0.117976	0.0599272	0.68128
Small vessel stroke	SomaScan	11431_235	P46063	RECQL	Inverse variance weighted (fixed effects)	2	0.165492	0.0887503	0.0622245	0.68128
Small vessel stroke	SomaScan	3143_3	P01730	CD4	Wald ratio	1	-0.813839	0.436573	0.0623005	0.68128
Small vessel stroke	SomaScan	3329_14	O75594	PGLYRP1	Wald ratio	1	-0.218619	0.117155	0.0620314	0.68128
Small vessel stroke	SomaScan	15596_7	O94992	HEXIM1	Wald ratio	1	0.493714	0.264	0.0614658	0.68128
Small vessel stroke	SomaScan	15480_2	O95498	VNN2	Inverse variance weighted (fixed effects)	4	-0.0720574	0.0385636	0.0616875	0.68128
Ischemic stroke	Olink	OID31377	Q9Y5E8	PCDHB15	Inverse variance weighted (fixed effects)	3	0.0358665	0.0192497	0.0624311	0.681406
Ischemic stroke	Olink	OID20765	O00626	CCL22	Inverse variance weighted (fixed effects)	2	0.096974	0.0520835	0.0626181	0.681566
Ischemic stroke	Olink	OID31426	Q9BRQ6	CHCHD6	Wald ratio	1	-0.0566022	0.0304278	0.0628551	0.681566
Ischemic stroke	SomaScan	11356_19	Q96DF8	DGCR14	Wald ratio	1	-0.131313	0.0707071	0.0632908	0.681566
Ischemic stroke	SomaScan	10442_1	Q8WZ59	TMEM190	Inverse variance weighted (fixed effects)	5	-0.0283832	0.0152882	0.0633762	0.681566
Cardioembolic stroke	Olink	OID21112	Q9Y240	CLEC11A	Inverse variance weighted (fixed effects)	2	0.129548	0.0696906	0.0630416	0.681566
Cardioembolic stroke	Olink	OID30653	Q92619	ARHGAP45	Wald ratio	1	0.480252	0.258381	0.0630703	0.681566
Cardioembolic stroke	SomaScan	11212_7	Q8NBS9	TXNDC5	Inverse variance weighted (fixed effects)	2	-0.210914	0.113357	0.0627993	0.681566
Cardioembolic stroke	SomaScan	2778_10	Q9GZX6	IL22	Wald ratio	1	-0.564734	0.303415	0.062708	0.681566
Cardioembolic stroke	SomaScan	9964_10	P0CAP1	MYZAP	Wald ratio	1	-0.446927	0.240223	0.0628197	0.681566
Cardioembolic stroke	SomaScan	16758_96	P51858	HDGF	Wald ratio	1	0.430464	0.231788	0.0632908	0.681566
Large artery stroke	Olink	OID30782	P02766	TTR	Wald ratio	1	0.337611	0.181987	0.0635762	0.681566
Large artery stroke	Olink	OID30151	O15018	PDZD2	Wald ratio	1	-0.203501	0.109499	0.0631025	0.681566
Large artery stroke	Olink	OID20867	Q9NRG1	PRTFDC1	Wald ratio	1	0.399493	0.214876	0.0630023	0.681566
Large artery stroke	Olink	OID30611	P40197	GP5	Wald ratio	1	0.35508	0.191311	0.0634491	0.681566
Large artery stroke	Olink	OID21193	Q6BAA4	FCRLB	Inverse variance weighted (fixed effects)	3	-0.11301	0.0608029	0.0630788	0.681566
Large artery stroke	SomaScan	4297_62	Q9HCB6	SPON1	Inverse variance weighted (fixed effects)	2	0.134352	0.072401	0.0635019	0.681566
Large artery stroke	SomaScan	16324_38	Q15399	TLR1	Wald ratio	1	-0.335565	0.180804	0.0634583	0.681566
Large artery stroke	SomaScan	7185_29	P40197	GP5	Wald ratio	1	0.40665	0.219096	0.0634491	0.681566
Small vessel stroke	Olink	OID20736	Q9UJA9	ENPP5	Inverse variance weighted (fixed effects)	4	0.123743	0.0667068	0.0635929	0.681566
Small vessel stroke	Olink	OID30618	Q9BXJ0	C1QTNF5	Wald ratio	1	0.338846	0.182267	0.0630186	0.681566
Small vessel stroke	Olink	OID20395	P55774	CCL18	Inverse variance weighted (fixed effects)	2	-0.0904354	0.0487093	0.0633628	0.681566
Small vessel stroke	SomaScan	7810_20	Q9BXJ0	C1QTNF5	Wald ratio	1	0.198211	0.106619	0.0630186	0.681566
Small vessel stroke	SomaScan	14618_26	Q96AW1	VOPP1	Wald ratio	1	0.466232	0.250943	0.0631799	0.681566
Cardioembolic stroke	SomaScan	8243_55	P00995	SPINK1	Wald ratio	1	-0.270079	0.145631	0.0636612	0.681763
Small vessel stroke	Olink	OID30415	Q13510	ASAH1	Inverse variance weighted (fixed effects)	2	0.122884	0.0663105	0.06386	0.683357
Large artery stroke	Olink	OID20336	Q13867	BLMH	Wald ratio	1	0.132156	0.0713441	0.0639711	0.684011
Cardioembolic stroke	SomaScan	2692_74	P14555	PLA2G2A	Inverse variance weighted (fixed effects)	3	-0.0639639	0.034546	0.0640896	0.684644
Cardioembolic stroke	SomaScan	12975_11	P35900	KRT20	Wald ratio	1	-0.549488	0.296928	0.0642308	0.684644
Large artery stroke	SomaScan	19154_41	P07093	SERPINE2	Inverse variance weighted (fixed effects)	4	-0.103562	0.0559587	0.0642159	0.684644
Small vessel stroke	SomaScan	18225_13	Q9NRV9	HEBP1	Inverse variance weighted (fixed effects)	3	0.0785917	0.0424682	0.0642268	0.684644
Ischemic stroke	SomaScan	17224_12	P20774	OGN	Inverse variance weighted (fixed effects)	3	-0.0397537	0.021492	0.0643564	0.684914
Cardioembolic stroke	Olink	OID30375	P13667	PDIA4	Wald ratio	1	0.348578	0.188421	0.0643135	0.684914
Large artery stroke	SomaScan	6920_1	Q6UXV0	GFRAL	Inverse variance weighted (fixed effects)	4	-0.249697	0.135032	0.0644347	0.685215
Small vessel stroke	Olink	OID20457	O76038	SCGN	Wald ratio	1	0.435744	0.235713	0.0645121	0.685504
Ischemic stroke	SomaScan	19223_6	P62820	RAB1A	Wald ratio	1	0.240527	0.130148	0.0645877	0.685774
Small vessel stroke	Olink	OID20651	O75077	ADAM23	Inverse variance weighted (fixed effects)	3	-0.0909807	0.0492572	0.0647397	0.686854
Cardioembolic stroke	SomaScan	16918_198	O15455	TLR3	Inverse variance weighted (fixed effects)	4	-0.0790603	0.0428155	0.0648149	0.687118
Large artery stroke	Olink	OID30150	P10082	PYY	Wald ratio	1	0.170512	0.0924116	0.0650182	0.687673
Large artery stroke	SomaScan	9326_33	P19823	ITIH2	Inverse variance weighted (fixed effects)	4	0.0766435	0.0415339	0.0649905	0.687673
Small vessel stroke	Olink	OID20291	P19021	PAM	Inverse variance weighted (fixed effects)	3	-0.09951	0.0539283	0.0650045	0.687673
Cardioembolic stroke	SomaScan	2579_17	P14780	MMP9	Wald ratio	1	0.428656	0.232461	0.0651846	0.688368
Large artery stroke	Olink	OID20067	Q96N03	VSTM2L	Inverse variance weighted (fixed effects)	2	-0.274295	0.148744	0.0651729	0.688368
Ischemic stroke	SomaScan	2946_52	P00746	CFD	Inverse variance weighted (fixed effects)	2	-0.141895	0.0769887	0.0653207	0.689113
Large artery stroke	SomaScan	14123_34	Q9H7M9	C10orf54	Inverse variance weighted (fixed effects)	3	-0.119182	0.0646737	0.065356	0.689113
Ischemic stroke	SomaScan	18918_86	P27815	PDE4A	Wald ratio	1	0.0948974	0.0515659	0.0657221	0.691905
Large artery stroke	SomaScan	5355_69	O43557	TNFSF14	Wald ratio	1	0.377369	0.205055	0.0657189	0.691905
Ischemic stroke	Olink	OID21298	Q9UJ71	CD207	Inverse variance weighted (fixed effects)	2	-0.0366471	0.0199185	0.0657901	0.692087
Ischemic stroke	SomaScan	12343_14	Q15057	ACAP2	Wald ratio	1	-0.273973	0.148973	0.0659034	0.692746
Small vessel stroke	Olink	OID20390	O14786	NRP1	Inverse variance weighted (fixed effects)	2	-0.123408	0.0671759	0.0661963	0.69529
Large artery stroke	SomaScan	9201_13	P37802	TAGLN2	Wald ratio	1	0.447198	0.243534	0.0663158	0.69601
Ischemic stroke	Olink	OID30743	P08185	SERPINA6	Inverse variance weighted (fixed effects)	2	0.0561226	0.0305879	0.0665358	0.696713
Cardioembolic stroke	SomaScan	11187_11	Q5QGZ9	CLEC12A	Inverse variance weighted (fixed effects)	4	-0.0645382	0.0351685	0.0664887	0.696713
Cardioembolic stroke	SomaScan	7251_64	Q9BXJ4	C1QTNF3	Wald ratio	1	0.240561	0.131068	0.0664478	0.696713
Small vessel stroke	SomaScan	9986_14	Q8N729	NPW	Inverse variance weighted (fixed effects)	2	-0.0898049	0.0489552	0.0665905	0.696753
Cardioembolic stroke	SomaScan	3348_49	P13497	BMP1	Wald ratio	1	-0.537037	0.292824	0.0666552	0.696896
Cardioembolic stroke	SomaScan	18864_7	P35030	PRSS3	Inverse variance weighted (fixed effects)	3	-0.0869629	0.0474311	0.066735	0.697197
Ischemic stroke	SomaScan	15503_20	O00292	LEFTY2	Inverse variance weighted (fixed effects)	3	-0.0223855	0.0122122	0.0667953	0.697294
Ischemic stroke	SomaScan	8859_51	O75493	CA11	Wald ratio	1	-0.100384	0.0548546	0.0672499	0.698032
Cardioembolic stroke	Olink	OID30279	Q96DR5	BPIFA2	Wald ratio	1	0.259254	0.141619	0.0671535	0.698032
Cardioembolic stroke	Olink	OID21066	O94907	DKK1	Inverse variance weighted (fixed effects)	2	-0.257391	0.140507	0.066971	0.698032
Cardioembolic stroke	SomaScan	5487_7	Q9NQ25	SLAMF7	Inverse variance weighted (fixed effects)	2	0.07657	0.0418415	0.0672501	0.698032
Cardioembolic stroke	SomaScan	5508_62	P07339	CTSD	Inverse variance weighted (fixed effects)	2	-0.144079	0.078741	0.0672832	0.698032
Large artery stroke	SomaScan	18382_109	P21964	COMT	Wald ratio	1	-0.482968	0.26399	0.0673258	0.698032
Small vessel stroke	Olink	OID30347	P08582	MELTF	Inverse variance weighted (fixed effects)	3	0.106956	0.0583828	0.0669552	0.698032
Small vessel stroke	Olink	OID20420	Q13651	IL10RA	Wald ratio	1	0.424868	0.232012	0.0670656	0.698032
Small vessel stroke	SomaScan	9545_156	P49863	GZMK	Wald ratio	1	0.264111	0.144251	0.0671128	0.698032
Small vessel stroke	SomaScan	19262_219	P49748	ACADVL	Wald ratio	1	-0.755187	0.412863	0.0673778	0.698042
Ischemic stroke	Olink	OID21109	O43278	SPINT1	Inverse variance weighted (fixed effects)	2	-0.0515916	0.0282811	0.068115	0.700611
Ischemic stroke	SomaScan	5275_28	P15498	VAV1	Wald ratio	1	-0.222618	0.121995	0.0680286	0.700611
Ischemic stroke	SomaScan	2819_23	P33151	CDH5	Inverse variance weighted (fixed effects)	2	-0.0902505	0.0494304	0.0678792	0.700611
Large artery stroke	Olink	OID30739	P00748	F12	Inverse variance weighted (fixed effects)	3	0.109366	0.0599193	0.0679668	0.700611
Large artery stroke	Olink	OID30696	P12821	ACE	Inverse variance weighted (fixed effects)	2	0.114058	0.0624741	0.0678989	0.700611
Large artery stroke	Olink	OID20804	Q9NSK7	C19orf12	Wald ratio	1	0.719058	0.394099	0.0680672	0.700611
Large artery stroke	SomaScan	4992_49	P28799	GRN	Inverse variance weighted (fixed effects)	2	-0.28111	0.154035	0.0680046	0.700611
Large artery stroke	SomaScan	14079_14	Q13478	IL18R1	Inverse variance weighted (fixed effects)	4	0.0947819	0.0519612	0.0681384	0.700611
Small vessel stroke	Olink	OID30773	P03951	F11	Inverse variance weighted (fixed effects)	2	0.101996	0.055882	0.0679711	0.700611
Small vessel stroke	SomaScan	15305_7	O76038	SCGN	Wald ratio	1	0.52576	0.287979	0.0678973	0.700611
Ischemic stroke	SomaScan	5704_74	P51124	GZMM	Wald ratio	1	-0.460877	0.252794	0.0682838	0.701107
Cardioembolic stroke	Olink	OID20881	P23276	KEL	Inverse variance weighted (fixed effects)	2	-0.159928	0.0877512	0.0683764	0.701107
Large artery stroke	SomaScan	2632_5	P42701	IL12RB1	Wald ratio	1	-0.529709	0.290771	0.0684946	0.701107
Small vessel stroke	Olink	OID20978	P02771	AFP	Wald ratio	1	-0.197802	0.108576	0.068488	0.701107
Small vessel stroke	Olink	OID21474	Q96PD2	DCBLD2	Wald ratio	1	-0.161408	0.0885967	0.0684813	0.701107
Small vessel stroke	SomaScan	9837_60	P15559	NQO1	Inverse variance weighted (fixed effects)	2	-0.0640203	0.0351255	0.0683615	0.701107
Small vessel stroke	SomaScan	3066_12	P17931	LGALS3	Inverse variance weighted (fixed effects)	2	-0.11945	0.0655814	0.068547	0.701119
Large artery stroke	Olink	OID30526	Q9H171	ZBP1	Wald ratio	1	-0.339274	0.186351	0.0686649	0.701799
Ischemic stroke	Olink	OID30516	Q15465	SHH	Wald ratio	1	0.222107	0.123393	0.0718606	0.702648
Ischemic stroke	Olink	OID21017	P15311	EZR	Wald ratio	1	-0.163881	0.0908256	0.0711768	0.702648
Ischemic stroke	Olink	OID20957	Q92752	TNR	Inverse variance weighted (fixed effects)	3	-0.0349117	0.0192295	0.0694423	0.702648
Ischemic stroke	Olink	OID30811	P60880	SNAP25	Wald ratio	1	-0.131657	0.0731429	0.0718606	0.702648
Ischemic stroke	Olink	OID30194	Q8ND90	PNMA1	Wald ratio	1	0.180813	0.100351	0.0715766	0.702648
Ischemic stroke	Olink	OID20405	P49747	COMP	Inverse variance weighted (fixed effects)	2	-0.0777807	0.0431455	0.0714271	0.702648
Ischemic stroke	Olink	OID20341	P20062	TCN2	Inverse variance weighted (fixed effects)	3	-0.0356922	0.0197918	0.0713277	0.702648
Ischemic stroke	Olink	OID20725	Q99983	OMD	Wald ratio	1	-0.196371	0.108293	0.0697804	0.702648
Ischemic stroke	Olink	OID21169	Q6PGN9	PSRC1	Inverse variance weighted (fixed effects)	2	0.0671481	0.0369244	0.0689837	0.702648
Ischemic stroke	SomaScan	9204_33	P01189	POMC	Wald ratio	1	-0.268591	0.14775	0.0690824	0.702648
Ischemic stroke	SomaScan	9470_15	Q5JXM2	METTL24	Inverse variance weighted (fixed effects)	2	-0.125405	0.0691812	0.069878	0.702648
Ischemic stroke	SomaScan	9638_2	Q495A1	TIGIT	Wald ratio	1	0.188406	0.103865	0.0696849	0.702648
Ischemic stroke	SomaScan	11102_22	Q9BYZ8	REG4	Inverse variance weighted (fixed effects)	2	-0.103558	0.0575339	0.0718679	0.702648
Ischemic stroke	SomaScan	9940_35	Q4G0W2	DUSP28	Wald ratio	1	-0.0935841	0.0517699	0.0706544	0.702648
Ischemic stroke	SomaScan	9886_28	Q13426	XRCC4	Wald ratio	1	0.123537	0.0682705	0.0703697	0.702648
Ischemic stroke	SomaScan	9015_1	Q9Y2Y8	PRG3	Wald ratio	1	0.168981	0.09375	0.0714716	0.702648
Cardioembolic stroke	Olink	OID31418	P84022	SMAD3	Inverse variance weighted (fixed effects)	2	-0.132828	0.0734778	0.0706481	0.702648
Cardioembolic stroke	Olink	OID30669	P40925	MDH1	Wald ratio	1	0.370359	0.204298	0.0698574	0.702648
Cardioembolic stroke	Olink	OID30511	P56645	PER3	Inverse variance weighted (fixed effects)	3	0.0808025	0.0448761	0.071771	0.702648
Cardioembolic stroke	Olink	OID20768	P36941	LTBR	Wald ratio	1	0.106369	0.058808	0.0704909	0.702648
Cardioembolic stroke	Olink	OID20296	P08236	GUSB	Inverse variance weighted (fixed effects)	2	-0.208805	0.115484	0.0705932	0.702648
Cardioembolic stroke	Olink	OID20746	Q96KG7	MEGF10	Inverse variance weighted (fixed effects)	2	0.0822439	0.045433	0.0702611	0.702648
Cardioembolic stroke	Olink	OID20693	P55773	CCL23	Inverse variance weighted (fixed effects)	2	-0.0989058	0.0546996	0.070581	0.702648
Cardioembolic stroke	Olink	OID20949	P16278	GLB1	Inverse variance weighted (fixed effects)	2	-0.126612	0.070213	0.0713483	0.702648
Cardioembolic stroke	Olink	OID30592	Q8NDA2	HMCN2	Inverse variance weighted (fixed effects)	2	-0.0896959	0.0498283	0.0718452	0.702648
Cardioembolic stroke	SomaScan	9449_150	P04003	C4BPA	Inverse variance weighted (fixed effects)	4	0.0839047	0.0464025	0.0705765	0.702648
Cardioembolic stroke	SomaScan	7145_1	Q06033	ITIH3	Inverse variance weighted (fixed effects)	2	-0.0812324	0.0449975	0.0710331	0.702648
Cardioembolic stroke	SomaScan	5463_22	P54826	GAS1	Wald ratio	1	0.354686	0.196916	0.0716706	0.702648
Cardioembolic stroke	SomaScan	19113_66	Q9UJC5	SH3BGRL2	Wald ratio	1	-0.281649	0.156035	0.0710698	0.702648
Cardioembolic stroke	SomaScan	5918_5	Q06323	PSME1	Wald ratio	1	0.567568	0.314189	0.0708478	0.702648
Cardioembolic stroke	SomaScan	2834_54	O60259	KLK8	Inverse variance weighted (fixed effects)	2	-0.110209	0.0608127	0.0699449	0.702648
Cardioembolic stroke	SomaScan	19523_215	Q99497	PARK7	Wald ratio	1	-0.26773	0.147163	0.0688692	0.702648
Cardioembolic stroke	SomaScan	15556_49	P19961	AMY2B	Inverse variance weighted (fixed effects)	3	0.0965614	0.0535665	0.071444	0.702648
Large artery stroke	Olink	OID20275	P08118	MSMB	Inverse variance weighted (fixed effects)	2	0.116247	0.0640336	0.0694607	0.702648
Large artery stroke	Olink	OID30649	Q9HB71	CACYBP	Wald ratio	1	0.370306	0.205272	0.0712349	0.702648
Large artery stroke	Olink	OID21423	Q10471	GALNT2	Inverse variance weighted (fixed effects)	3	-0.133196	0.0738177	0.071169	0.702648
Large artery stroke	Olink	OID21424	Q9BZR6	RTN4R	Inverse variance weighted (fixed effects)	3	0.123989	0.0688538	0.0717424	0.702648
Large artery stroke	Olink	OID20868	Q16762	TST	Inverse variance weighted (fixed effects)	2	0.350528	0.194181	0.0710492	0.702648
Large artery stroke	Olink	OID20866	Q9H3R2	MUC13	Inverse variance weighted (fixed effects)	2	0.165999	0.0920635	0.0713737	0.702648
Large artery stroke	SomaScan	8664_36	Q504Y2	PKDCC	Wald ratio	1	-0.628429	0.349127	0.0718606	0.702648
Large artery stroke	SomaScan	17813_21	Q86WA6	BPHL	Wald ratio	1	0.481123	0.267183	0.0717463	0.702648
Large artery stroke	SomaScan	8866_53	Q9NXS2	QPCTL	Wald ratio	1	0.15921	0.0876212	0.0692139	0.702648
Large artery stroke	SomaScan	18381_16	P05091	ALDH2	Wald ratio	1	0.525739	0.291347	0.0711512	0.702648
Large artery stroke	SomaScan	17210_2	P56279	TCL1A	Wald ratio	1	-0.22362	0.12362	0.0704621	0.702648
Large artery stroke	SomaScan	13416_8	Q14C87	TMEM132D	Inverse variance weighted (fixed effects)	3	0.129731	0.071646	0.0701832	0.702648
Large artery stroke	SomaScan	5061_27	O75144	ICOSLG	Wald ratio	1	0.659148	0.365915	0.0716446	0.702648
Large artery stroke	SomaScan	9380_2	Q9BX93	PLA2G12B	Wald ratio	1	-0.474565	0.262383	0.0705017	0.702648
Large artery stroke	SomaScan	9241_40	Q9P1W8	SIRPG	Wald ratio	1	-0.262219	0.14465	0.0698649	0.702648
Small vessel stroke	Olink	OID20527	Q8N608	DPP10	Inverse variance weighted (fixed effects)	3	-0.121927	0.0674284	0.0705691	0.702648
Small vessel stroke	Olink	OID20992	Q9BYC5	FUT8	Inverse variance weighted (fixed effects)	3	0.0767494	0.0426347	0.0718351	0.702648
Small vessel stroke	Olink	OID30720	P36980	CFHR2	Inverse variance weighted (fixed effects)	2	0.0742833	0.041272	0.0718845	0.702648
Small vessel stroke	Olink	OID21463	O15123	ANGPT2	Inverse variance weighted (fixed effects)	2	-0.184945	0.10258	0.0713973	0.702648
Small vessel stroke	Olink	OID20550	P20849	COL9A1	Wald ratio	1	0.248377	0.136576	0.0689718	0.702648
Small vessel stroke	Olink	OID21361	Q13576	IQGAP2	Wald ratio	1	0.249675	0.138324	0.0710747	0.702648
Small vessel stroke	Olink	OID30619	Q96HD1	CRELD1	Inverse variance weighted (fixed effects)	3	-0.0966353	0.0536533	0.071686	0.702648
Small vessel stroke	Olink	OID21396	Q15116	PDCD1	Inverse variance weighted (fixed effects)	3	-0.17514	0.0970784	0.0712139	0.702648
Small vessel stroke	SomaScan	9886_28	Q13426	XRCC4	Wald ratio	1	0.36541	0.202211	0.0707507	0.702648
Small vessel stroke	SomaScan	3806_55	P54756	EPHA5	Inverse variance weighted (fixed effects)	2	0.333358	0.183631	0.069467	0.702648
Small vessel stroke	SomaScan	2778_10	Q9GZX6	IL22	Wald ratio	1	0.672756	0.373312	0.0715253	0.702648
Small vessel stroke	SomaScan	3323_37	Q14114	LRP8	Inverse variance weighted (fixed effects)	2	0.190914	0.105586	0.0705865	0.702648
Small vessel stroke	SomaScan	8778_3	Q13253	NOG	Wald ratio	1	-0.280525	0.15439	0.0692181	0.702648
Ischemic stroke	Olink	OID21294	Q9Y653	ADGRG1	Wald ratio	1	-0.188694	0.105612	0.0739914	0.704138
Ischemic stroke	Olink	OID30573	P30101	PDIA3	Wald ratio	1	-0.244299	0.13647	0.0734341	0.704138
Ischemic stroke	Olink	OID21480	Q7Z4W1	DCXR	Wald ratio	1	-0.16173	0.0906668	0.0744588	0.704138
Ischemic stroke	Olink	OID20693	P55773	CCL23	Inverse variance weighted (fixed effects)	2	-0.038814	0.0216088	0.0724605	0.704138
Ischemic stroke	SomaScan	4160_49	P08253	MMP2	Inverse variance weighted (fixed effects)	2	0.12401	0.0694465	0.0741496	0.704138
Ischemic stroke	SomaScan	7916_10	P31151	S100A7	Inverse variance weighted (fixed effects)	4	0.0239799	0.0133499	0.0724529	0.704138
Ischemic stroke	SomaScan	11388_75	Q14508	WFDC2	Wald ratio	1	-0.201493	0.112873	0.0742412	0.704138
Ischemic stroke	SomaScan	6969_14	Q8TCV5	WFDC5	Wald ratio	1	0.241026	0.135043	0.0742921	0.704138
Ischemic stroke	SomaScan	8351_17	Q6UWY2	PRSS57	Inverse variance weighted (fixed effects)	3	0.0393352	0.0220439	0.0743574	0.704138
Ischemic stroke	SomaScan	10440_26	Q9H6B4	CLMP	Inverse variance weighted (fixed effects)	2	-0.0644207	0.0359095	0.0728176	0.704138
Cardioembolic stroke	Olink	OID20626	P35613	BSG	Wald ratio	1	-0.31151	0.173981	0.0733774	0.704138
Cardioembolic stroke	Olink	OID30367	P13796	LCP1	Inverse variance weighted (fixed effects)	3	0.0473688	0.0265087	0.0739506	0.704138
Cardioembolic stroke	Olink	OID21339	Q96I82	KAZALD1	Inverse variance weighted (fixed effects)	3	-0.0410544	0.0228569	0.0724705	0.704138
Cardioembolic stroke	Olink	OID30325	O75154	RAB11FIP3	Wald ratio	1	-0.582695	0.324462	0.0725136	0.704138
Cardioembolic stroke	Olink	OID20622	Q6UXB2	CXCL17	Wald ratio	1	0.447742	0.251007	0.0744588	0.704138
Cardioembolic stroke	Olink	OID20098	P40225	THPO	Wald ratio	1	-0.544036	0.304719	0.074202	0.704138
Cardioembolic stroke	SomaScan	9172_69	P22894	MMP8	Inverse variance weighted (fixed effects)	2	0.140661	0.0787131	0.0739356	0.704138
Cardioembolic stroke	SomaScan	6451_64	Q9BXN1	ASPN	Wald ratio	1	0.0769819	0.0430793	0.0739404	0.704138
Cardioembolic stroke	SomaScan	16781_2	Q8NFI3	ENGASE	Inverse variance weighted (fixed effects)	4	0.0658978	0.036935	0.0743985	0.704138
Cardioembolic stroke	SomaScan	13113_7	P10451	SPP1	Wald ratio	1	-0.437879	0.243939	0.0726488	0.704138
Cardioembolic stroke	SomaScan	15589_1	P02774	GC	Inverse variance weighted (fixed effects)	2	0.220571	0.123075	0.0731056	0.704138
Large artery stroke	Olink	OID20188	P06858	LPL	Inverse variance weighted (fixed effects)	3	-0.133394	0.0745223	0.0734563	0.704138
Large artery stroke	Olink	OID21095	O15394	NCAM2	Inverse variance weighted (fixed effects)	3	0.0891812	0.0497823	0.0732254	0.704138
Large artery stroke	Olink	OID31484	Q96DE0	NUDT16	Wald ratio	1	0.308647	0.172334	0.0732959	0.704138
Large artery stroke	Olink	OID30211	P23327	HRC	Wald ratio	1	-0.413493	0.231127	0.0736101	0.704138
Large artery stroke	Olink	OID30789	P01008	SERPINC1	Wald ratio	1	-0.754176	0.420341	0.0727808	0.704138
Large artery stroke	Olink	OID30825	Q7RTW8	OTOA	Wald ratio	1	0.744319	0.415067	0.0729331	0.704138
Large artery stroke	Olink	OID30968	Q53EL9	SEZ6	Wald ratio	1	0.625235	0.349961	0.0740045	0.704138
Large artery stroke	Olink	OID21458	P62166	NCS1	Wald ratio	1	-0.473897	0.264126	0.0727793	0.704138
Large artery stroke	Olink	OID30650	O60279	SUSD5	Inverse variance weighted (fixed effects)	3	0.120344	0.0671253	0.0730013	0.704138
Large artery stroke	Olink	OID30311	Q8N4F0	BPIFB2	Inverse variance weighted (fixed effects)	2	-0.142673	0.079674	0.0733391	0.704138
Large artery stroke	Olink	OID20379	P16109	SELP	Wald ratio	1	0.167025	0.0935138	0.0740837	0.704138
Large artery stroke	SomaScan	3508_78	O00626	CCL22	Inverse variance weighted (fixed effects)	4	-0.190486	0.105948	0.0721907	0.704138
Large artery stroke	SomaScan	19161_1	Q9Y4E8	USP15	Wald ratio	1	-0.3003	0.167668	0.0732861	0.704138
Large artery stroke	SomaScan	5000_52	Q08380	LGALS3BP	Inverse variance weighted (fixed effects)	2	0.272481	0.151802	0.0726578	0.704138
Small vessel stroke	Olink	OID30647	Q15276	RABEP1	Wald ratio	1	-0.504801	0.282346	0.0737956	0.704138
Small vessel stroke	Olink	OID20516	Q7L8A9	VASH1	Inverse variance weighted (fixed effects)	2	0.302946	0.168991	0.0730256	0.704138
Small vessel stroke	Olink	OID20745	Q92583	CCL17	Inverse variance weighted (fixed effects)	2	0.162012	0.0901949	0.0724556	0.704138
Small vessel stroke	Olink	OID21459	Q16775	HAGH	Wald ratio	1	0.457302	0.254273	0.0721027	0.704138
Small vessel stroke	Olink	OID21120	Q5T2D2	TREML2	Inverse variance weighted (fixed effects)	3	-0.121706	0.0681825	0.0742615	0.704138
Small vessel stroke	Olink	OID20852	Q15043	SLC39A14	Wald ratio	1	-0.380161	0.212443	0.0735386	0.704138
Small vessel stroke	SomaScan	2864_2	Q02750	MAP2K1	Wald ratio	1	0.576649	0.321747	0.0730939	0.704138
Small vessel stroke	SomaScan	12662_82	Q13011	ECH1	Wald ratio	1	0.135998	0.0761501	0.0741116	0.704138
Small vessel stroke	SomaScan	3367_8	Q9UGM5	FETUB	Inverse variance weighted (fixed effects)	2	0.162252	0.0902977	0.0723589	0.704138
Small vessel stroke	SomaScan	17677_47	O95971	CD160	Wald ratio	1	-0.386548	0.215559	0.0729357	0.704138
Small vessel stroke	SomaScan	14009_65	P21580	TNFAIP3	Wald ratio	1	-0.274299	0.153056	0.0731099	0.704138
Small vessel stroke	SomaScan	5656_53	P21128	ENDOU	Wald ratio	1	0.595489	0.333835	0.0744588	0.704138
Cardioembolic stroke	Olink	OID21019	P22894	MMP8	Inverse variance weighted (fixed effects)	2	0.0835962	0.046933	0.0748829	0.70425
Cardioembolic stroke	Olink	OID31385	Q8NEB7	ACRBP	Wald ratio	1	0.204112	0.114502	0.07465	0.70425
Cardioembolic stroke	Olink	OID20632	Q13241	KLRD1	Inverse variance weighted (fixed effects)	2	0.0770221	0.0432358	0.0748402	0.70425
Cardioembolic stroke	Olink	OID31488	Q13443	ADAM9	Inverse variance weighted (fixed effects)	2	0.259979	0.145853	0.0746721	0.70425
Large artery stroke	Olink	OID30775	O43866	CD5L	Inverse variance weighted (fixed effects)	2	-0.190355	0.106848	0.0748228	0.70425
Large artery stroke	Olink	OID20213	Q99523	SORT1	Inverse variance weighted (fixed effects)	2	-0.208324	0.116929	0.0748104	0.70425
Large artery stroke	Olink	OID21317	Q8N129	CNPY4	Inverse variance weighted (fixed effects)	2	-0.218215	0.122462	0.0747646	0.70425
Small vessel stroke	Olink	OID21440	P13726	F3	Inverse variance weighted (fixed effects)	3	-0.177437	0.0995056	0.0745564	0.70425
Cardioembolic stroke	Olink	OID21194	P50749	RASSF2	Inverse variance weighted (fixed effects)	2	-0.278376	0.156359	0.0750161	0.704533
Small vessel stroke	Olink	OID20965	Q6ISS4	LAIR2	Inverse variance weighted (fixed effects)	3	0.0867208	0.0487087	0.0750109	0.704533
Cardioembolic stroke	Olink	OID30713	P26927	MST1	Wald ratio	1	0.0920105	0.0517062	0.0751599	0.704914
Large artery stroke	SomaScan	5660_51	P08294	SOD3	Inverse variance weighted (fixed effects)	4	0.108543	0.0609868	0.0751117	0.704914
Ischemic stroke	Olink	OID21434	P27695	APEX1	Wald ratio	1	0.0411589	0.0231519	0.0754404	0.705631
Cardioembolic stroke	Olink	OID20075	P35218	CA5A	Inverse variance weighted (fixed effects)	2	0.102884	0.0578806	0.0754817	0.705631
Cardioembolic stroke	SomaScan	9478_69	Q14558	PRPSAP1	Wald ratio	1	-0.395062	0.222222	0.0754404	0.705631
Small vessel stroke	Olink	OID30561	Q9H7Z7	PTGES2	Wald ratio	1	0.622892	0.350442	0.0754945	0.705631
Small vessel stroke	SomaScan	18458_4	Q9H7Z7	PTGES2	Wald ratio	1	0.651795	0.366703	0.0754945	0.705631
Ischemic stroke	Olink	OID30620	P0C862	C1QTNF9	Inverse variance weighted (fixed effects)	4	0.0238749	0.0134374	0.0756097	0.706225
Small vessel stroke	SomaScan	3516_60	P48061	CXCL12	Wald ratio	1	0.279503	0.15735	0.0756809	0.706407
Cardioembolic stroke	SomaScan	8065_245	P0C8F1	PATE4	Wald ratio	1	0.243307	0.137008	0.0757557	0.706622
Ischemic stroke	SomaScan	19635_69	Q14314	FGL2	Wald ratio	1	-0.242678	0.136681	0.0758137	0.706681
Small vessel stroke	SomaScan	6255_74	Q96SM3	CPXM1	Inverse variance weighted (fixed effects)	3	0.114289	0.0644203	0.0760437	0.708342
Ischemic stroke	Olink	OID31104	Q5F1R6	DNAJC21	Wald ratio	1	-0.115512	0.0652085	0.0764895	0.709463
Ischemic stroke	Olink	OID20873	Q6UWL6	KIRREL2	Inverse variance weighted (fixed effects)	2	0.0722407	0.0408151	0.0767352	0.709463
Ischemic stroke	Olink	OID20367	Q9BXJ1	C1QTNF1	Wald ratio	1	-0.0600325	0.0339095	0.0766655	0.709463
Ischemic stroke	SomaScan	10366_11	P16234	PDGFRA	Inverse variance weighted (fixed effects)	2	0.111714	0.0630905	0.0766115	0.709463
Ischemic stroke	SomaScan	11302_237	Q92752	TNR	Wald ratio	1	-0.0996198	0.0562738	0.0766821	0.709463
Ischemic stroke	SomaScan	19113_66	Q9UJC5	SH3BGRL2	Wald ratio	1	-0.121688	0.0686948	0.0764895	0.709463
Cardioembolic stroke	Olink	OID31445	Q15599	SLC9A3R2	Wald ratio	1	0.282384	0.15952	0.0766917	0.709463
Large artery stroke	Olink	OID31100	P10092	CALCB	Inverse variance weighted (fixed effects)	2	-0.309605	0.174889	0.0766783	0.709463
Large artery stroke	Olink	OID21238	P30260	CDC27	Wald ratio	1	0.48958	0.276399	0.0765147	0.709463
Large artery stroke	Olink	OID20396	P19320	VCAM1	Inverse variance weighted (fixed effects)	2	0.404883	0.228506	0.0764154	0.709463
Large artery stroke	SomaScan	9574_11	O00499	BIN1	Wald ratio	1	0.298622	0.168453	0.0762739	0.709463
Small vessel stroke	SomaScan	5676_54	P42127	ASIP	Inverse variance weighted (fixed effects)	2	0.115579	0.0653312	0.0768742	0.710268
Ischemic stroke	Olink	OID20877	P61244	MAX	Wald ratio	1	0.164485	0.0930807	0.0772076	0.712109
Ischemic stroke	SomaScan	3194_36	Q9HCN6	GP6	Wald ratio	1	0.0481736	0.0272631	0.0772299	0.712109
Cardioembolic stroke	Olink	OID31365	P56851	EDDM3B	Wald ratio	1	0.18956	0.107251	0.0771543	0.712109
Ischemic stroke	Olink	OID21051	Q10588	BST1	Inverse variance weighted (fixed effects)	4	-0.0213301	0.0121683	0.079615	0.712736
Ischemic stroke	Olink	OID31155	Q00722	PLCB2	Wald ratio	1	-0.102141	0.0582728	0.0796348	0.712736
Ischemic stroke	Olink	OID20298	P09093	CELA3A	Inverse variance weighted (fixed effects)	2	-0.0591381	0.0336374	0.0787299	0.712736
Ischemic stroke	Olink	OID30583	Q9BRK3	MXRA8	Wald ratio	1	0.251886	0.142924	0.0780058	0.712736
Ischemic stroke	Olink	OID20180	Q9GZM7	TINAGL1	Inverse variance weighted (fixed effects)	2	0.13941	0.0789953	0.0775996	0.712736
Ischemic stroke	Olink	OID20224	Q01973	ROR1	Inverse variance weighted (fixed effects)	2	-0.0394822	0.0225376	0.0798017	0.712736
Ischemic stroke	Olink	OID30779	P08697	SERPINF2	Wald ratio	1	-0.0811947	0.046397	0.0801183	0.712736
Ischemic stroke	Olink	OID30406	Q9Y646	CPQ	Inverse variance weighted (fixed effects)	3	0.0413326	0.0236159	0.0800836	0.712736
Ischemic stroke	SomaScan	13068_139	O14618	CCS	Wald ratio	1	0.108753	0.0618921	0.0788935	0.712736
Ischemic stroke	SomaScan	18340_2	P28070	PSMB4	Inverse variance weighted (fixed effects)	2	0.0415172	0.0236287	0.078907	0.712736
Ischemic stroke	SomaScan	19206_20	P36639	NUDT1	Wald ratio	1	-0.131827	0.0753296	0.0801183	0.712736
Ischemic stroke	SomaScan	18396_10	Q08117	AES	Wald ratio	1	-0.294677	0.1673	0.0781769	0.712736
Ischemic stroke	SomaScan	5029_3	Q12884	FAP	Wald ratio	1	-0.0753363	0.0427931	0.0783266	0.712736
Ischemic stroke	SomaScan	7551_33	Q14392	LRRC32	Wald ratio	1	0.227994	0.12987	0.0791643	0.712736
Ischemic stroke	SomaScan	13545_97	Q8N9N8	EIF1AD	Wald ratio	1	0.0633635	0.0362077	0.0801183	0.712736
Ischemic stroke	SomaScan	8427_118	Q9BXY4	RSPO3	Inverse variance weighted (fixed effects)	2	0.0491126	0.0279744	0.0791528	0.712736
Ischemic stroke	SomaScan	15339_32	Q9Y281	CFL2	Wald ratio	1	0.113784	0.0650195	0.0801183	0.712736
Ischemic stroke	SomaScan	18864_7	P35030	PRSS3	Inverse variance weighted (fixed effects)	3	-0.0372129	0.0212768	0.0802924	0.712736
Cardioembolic stroke	Olink	OID30268	Q16621	NFE2	Wald ratio	1	-0.457264	0.259775	0.0783682	0.712736
Cardioembolic stroke	Olink	OID21057	Q16288	NTRK3	Inverse variance weighted (fixed effects)	3	-0.119164	0.0679685	0.0795646	0.712736
Cardioembolic stroke	Olink	OID30556	Q15762	CD226	Inverse variance weighted (fixed effects)	2	0.0971642	0.0555454	0.0802434	0.712736
Cardioembolic stroke	Olink	OID20350	P15144	ANPEP	Inverse variance weighted (fixed effects)	2	-0.06969	0.0395459	0.0780261	0.712736
Cardioembolic stroke	Olink	OID20670	Q9HBG7	LY9	Inverse variance weighted (fixed effects)	2	0.079764	0.0451722	0.0774332	0.712736
Cardioembolic stroke	Olink	OID30560	O15400	STX7	Inverse variance weighted (fixed effects)	3	-0.0730645	0.0417512	0.0801189	0.712736
Cardioembolic stroke	Olink	OID30285	P09543	CNP	Wald ratio	1	0.387923	0.221503	0.0798903	0.712736
Cardioembolic stroke	Olink	OID20310	P10586	PTPRF	Wald ratio	1	-0.376608	0.213448	0.077665	0.712736
Cardioembolic stroke	Olink	OID30287	Q24JP5	TMEM132A	Inverse variance weighted (fixed effects)	3	0.0748234	0.0425661	0.0787789	0.712736
Cardioembolic stroke	Olink	OID21222	Q9UQQ2	SH2B3	Wald ratio	1	0.415094	0.237196	0.0801183	0.712736
Cardioembolic stroke	SomaScan	17765_3	O95149	SNUPN	Wald ratio	1	-0.258065	0.146149	0.0774352	0.712736
Cardioembolic stroke	SomaScan	5132_71	Q6UWB1	IL27RA	Inverse variance weighted (fixed effects)	4	-0.0681516	0.0389629	0.080267	0.712736
Cardioembolic stroke	SomaScan	2658_27	Q16288	NTRK3	Inverse variance weighted (fixed effects)	3	-0.139741	0.079849	0.0801081	0.712736
Cardioembolic stroke	SomaScan	17419_17	Q9UGI8	TES	Wald ratio	1	0.524345	0.299625	0.0801183	0.712736
Cardioembolic stroke	SomaScan	15452_5	P21589	NT5E	Inverse variance weighted (fixed effects)	2	-0.0763909	0.0433032	0.0777164	0.712736
Cardioembolic stroke	SomaScan	8043_153	P49747	COMP	Inverse variance weighted (fixed effects)	2	-0.216577	0.122696	0.0775389	0.712736
Large artery stroke	Olink	OID20186	Q13275	SEMA3F	Wald ratio	1	0.304871	0.174105	0.0799333	0.712736
Large artery stroke	Olink	OID30700	P00390	GSR	Wald ratio	1	-0.334642	0.190043	0.0782605	0.712736
Large artery stroke	Olink	OID30109	Q9UFP1	GASK1A	Inverse variance weighted (fixed effects)	3	-0.096392	0.054766	0.0783957	0.712736
Large artery stroke	Olink	OID20967	O00220	TNFRSF10A	Inverse variance weighted (fixed effects)	3	-0.10682	0.0608889	0.0793707	0.712736
Large artery stroke	Olink	OID31509	P49223	SPINT3	Wald ratio	1	-0.406814	0.232622	0.080323	0.712736
Large artery stroke	SomaScan	10737_96	P30740	SERPINB1	Wald ratio	1	0.510101	0.291667	0.0803052	0.712736
Large artery stroke	SomaScan	4435_66	Q6UWV6	ENPP7	Inverse variance weighted (fixed effects)	3	0.122365	0.0699498	0.0802359	0.712736
Large artery stroke	SomaScan	16919_1	P07108	DBI	Inverse variance weighted (fixed effects)	2	-0.15995	0.0912257	0.0795437	0.712736
Large artery stroke	SomaScan	7905_30	P00738	HP	Inverse variance weighted (fixed effects)	2	0.0829095	0.0472188	0.0791128	0.712736
Large artery stroke	SomaScan	6414_8	Q86UD1	OAF	Inverse variance weighted (fixed effects)	4	0.0837628	0.047501	0.0778346	0.712736
Small vessel stroke	Olink	OID20194	P52888	THOP1	Wald ratio	1	-0.149974	0.0854328	0.0791809	0.712736
Small vessel stroke	Olink	OID21510	Q15303	ERBB4	Inverse variance weighted (fixed effects)	3	0.15283	0.0869785	0.0789004	0.712736
Small vessel stroke	Olink	OID21461	Q9H4F8	SMOC1	Inverse variance weighted (fixed effects)	3	-0.115754	0.0656005	0.0776439	0.712736
Small vessel stroke	Olink	OID21413	P02760	AMBP	Inverse variance weighted (fixed effects)	2	0.385637	0.220146	0.0798203	0.712736
Small vessel stroke	Olink	OID20671	P78556	CCL20	Wald ratio	1	-0.385166	0.21933	0.0790718	0.712736
Small vessel stroke	Olink	OID21496	Q02763	TEK	Inverse variance weighted (fixed effects)	2	0.086224	0.0491947	0.0796519	0.712736
Small vessel stroke	Olink	OID20637	P20273	CD22	Wald ratio	1	-0.155755	0.0885664	0.078642	0.712736
Small vessel stroke	Olink	OID31149	P54252	ATXN3	Wald ratio	1	0.137848	0.0782118	0.0779849	0.712736
Small vessel stroke	Olink	OID30099	A6BM72	MEGF11	Inverse variance weighted (fixed effects)	2	0.23498	0.133941	0.0793702	0.712736
Small vessel stroke	SomaScan	9339_204	P26885	FKBP2	Wald ratio	1	-0.771663	0.43911	0.078861	0.712736
Small vessel stroke	SomaScan	10440_26	Q9H6B4	CLMP	Inverse variance weighted (fixed effects)	2	-0.1751	0.0992813	0.0777869	0.712736
Small vessel stroke	SomaScan	6416_8	Q86XP6	GKN2	Inverse variance weighted (fixed effects)	3	0.104288	0.0592127	0.0781962	0.712736
Small vessel stroke	SomaScan	9383_24	Q15782	CHI3L2	Wald ratio	1	0.629543	0.358734	0.0792761	0.712736
Small vessel stroke	SomaScan	14636_25	P52758	HRSP12	Inverse variance weighted (fixed effects)	2	0.136776	0.0777878	0.0786933	0.712736
Large artery stroke	SomaScan	7841_84	Q96AP7	ESAM	Inverse variance weighted (fixed effects)	3	-0.181376	0.10376	0.0804588	0.713478
Ischemic stroke	SomaScan	16015_19	P24298	GPT	Wald ratio	1	0.261477	0.149701	0.0806952	0.713808
Cardioembolic stroke	Olink	OID20345	Q6EMK4	VASN	Wald ratio	1	-0.089944	0.0514956	0.0807004	0.713808
Cardioembolic stroke	SomaScan	8697_38	P35052	GPC1	Inverse variance weighted (fixed effects)	3	-0.0768265	0.043986	0.080705	0.713808
Large artery stroke	Olink	OID30307	P02008	HBZ	Inverse variance weighted (fixed effects)	3	0.0896311	0.0512992	0.0805988	0.713808
Small vessel stroke	Olink	OID30268	Q16621	NFE2	Wald ratio	1	-0.533222	0.305349	0.0807643	0.713871
Small vessel stroke	SomaScan	5601_2	Q96PD5	PGLYRP2	Inverse variance weighted (fixed effects)	2	-0.126255	0.0723231	0.0808623	0.714275
Ischemic stroke	Olink	OID31034	Q96I25	RBM17	Wald ratio	1	-0.079286	0.0454573	0.0811267	0.71454
Ischemic stroke	Olink	OID21397	Q9H6S3	EPS8L2	Inverse variance weighted (fixed effects)	2	0.0472236	0.0270937	0.0813381	0.71454
Ischemic stroke	SomaScan	7849_3	Q16769	QPCT	Inverse variance weighted (fixed effects)	3	0.0580513	0.0332694	0.0810044	0.71454
Cardioembolic stroke	Olink	OID30319	P53674	CRYBB1	Wald ratio	1	0.176662	0.101405	0.0814842	0.71454
Cardioembolic stroke	Olink	OID20405	P49747	COMP	Inverse variance weighted (fixed effects)	2	-0.214259	0.122921	0.0813219	0.71454
Cardioembolic stroke	SomaScan	9017_58	P09848	LCT	Wald ratio	1	-0.405024	0.232339	0.0812911	0.71454
Cardioembolic stroke	SomaScan	17751_68	P53674	CRYBB1	Wald ratio	1	0.160301	0.0920139	0.0814842	0.71454
Large artery stroke	Olink	OID31335	O14717	TRDMT1	Wald ratio	1	-0.249519	0.143167	0.0813586	0.71454
Large artery stroke	Olink	OID21123	P20774	OGN	Inverse variance weighted (fixed effects)	3	-0.126307	0.0724558	0.081293	0.71454
Large artery stroke	Olink	OID20409	P00915	CA1	Wald ratio	1	-0.425907	0.244502	0.0815197	0.71454
Large artery stroke	SomaScan	16296_43	O75473	LGR5	Wald ratio	1	-0.707439	0.405579	0.0811124	0.71454
Small vessel stroke	Olink	OID21065	Q96B86	RGMA	Inverse variance weighted (fixed effects)	2	-0.154427	0.0886264	0.0814306	0.71454
Cardioembolic stroke	SomaScan	3470_1	P16581	SELE	Wald ratio	1	0.256499	0.147314	0.0816527	0.715246
Large artery stroke	SomaScan	15615_8	O75022	LILRB3	Inverse variance weighted (fixed effects)	3	-0.0758949	0.0435983	0.0817229	0.715402
Ischemic stroke	Olink	OID20780	P15291	B4GALT1	Wald ratio	1	0.0591095	0.0340784	0.0828271	0.715444
Ischemic stroke	Olink	OID31497	P53990	IST1	Wald ratio	1	-0.148129	0.0853688	0.0827125	0.715444
Ischemic stroke	SomaScan	4220_39	P16591	FER	Wald ratio	1	-0.173228	0.0997375	0.082415	0.715444
Ischemic stroke	SomaScan	8252_2	Q6P988	NOTUM	Wald ratio	1	-0.129447	0.0745821	0.0826289	0.715444
Ischemic stroke	SomaScan	13381_49	P15291	B4GALT1	Wald ratio	1	0.0664858	0.0383311	0.0828271	0.715444
Ischemic stroke	SomaScan	4929_55	P04278	SHBG	Inverse variance weighted (fixed effects)	2	-0.072011	0.0414922	0.0826465	0.715444
Cardioembolic stroke	Olink	OID20825	Q9H1C3	GLT8D2	Wald ratio	1	0.196166	0.113045	0.0826887	0.715444
Cardioembolic stroke	Olink	OID21422	Q96D42	HAVCR1	Inverse variance weighted (fixed effects)	3	0.0811663	0.0467086	0.0822604	0.715444
Cardioembolic stroke	Olink	OID20600	P01135	TGFA	Wald ratio	1	-0.252476	0.145417	0.0825249	0.715444
Cardioembolic stroke	SomaScan	14066_49	Q86UL8	MAGI2	Inverse variance weighted (fixed effects)	4	0.068323	0.0393342	0.0823896	0.715444
Cardioembolic stroke	SomaScan	15427_35	P58215	LOXL3	Wald ratio	1	-0.340909	0.196197	0.0822833	0.715444
Cardioembolic stroke	SomaScan	4563_61	P19174	PLCG1	Wald ratio	1	-0.415546	0.239163	0.082299	0.715444
Large artery stroke	Olink	OID30953	P43146	DCC	Inverse variance weighted (fixed effects)	2	-0.161507	0.0930323	0.0825591	0.715444
Large artery stroke	Olink	OID21495	Q96J42	TXNDC15	Inverse variance weighted (fixed effects)	3	0.090066	0.0518885	0.0826064	0.715444
Large artery stroke	SomaScan	15594_47	Q92743	HTRA1	Wald ratio	1	-0.479452	0.275799	0.0821385	0.715444
Large artery stroke	SomaScan	18330_7	Q96G03	PGM2	Wald ratio	1	-0.471459	0.27167	0.0826685	0.715444
Large artery stroke	SomaScan	15308_108	Q2TAL6	VWC2	Inverse variance weighted (fixed effects)	2	-0.127193	0.0733126	0.0827504	0.715444
Small vessel stroke	Olink	OID20318	Q14393	GAS6	Inverse variance weighted (fixed effects)	2	-0.131013	0.0753203	0.0819628	0.715444
Small vessel stroke	Olink	OID20063	Q9NRV9	HEBP1	Wald ratio	1	0.340823	0.196051	0.0821338	0.715444
Small vessel stroke	SomaScan	4496_60	P39900	MMP12	Inverse variance weighted (fixed effects)	3	-0.0828792	0.047684	0.0821944	0.715444
Small vessel stroke	SomaScan	3168_8	Q9UNA0	ADAMTS5	Inverse variance weighted (fixed effects)	2	-0.0882148	0.050787	0.0823953	0.715444
Large artery stroke	Olink	OID31456	O60245	PCDH7	Wald ratio	1	-0.348066	0.200741	0.0829348	0.715532
Large artery stroke	Olink	OID21501	Q6FI81	CIAPIN1	Wald ratio	1	-0.665006	0.383588	0.0829811	0.715532
Large artery stroke	Olink	OID21410	Q9C005	DPY30	Wald ratio	1	0.734564	0.423729	0.0829944	0.715532
Cardioembolic stroke	SomaScan	18162_167	Q9NWZ3	IRAK4	Wald ratio	1	-0.390863	0.225526	0.0830745	0.715771
Small vessel stroke	Olink	OID30311	Q8N4F0	BPIFB2	Inverse variance weighted (fixed effects)	2	-0.128518	0.0742268	0.0833769	0.717924
Ischemic stroke	Olink	OID20606	P42702	LIFR	Inverse variance weighted (fixed effects)	2	-0.06878	0.0397676	0.0837108	0.717993
Ischemic stroke	Olink	OID20878	Q96FQ6	S100A16	Wald ratio	1	-0.12364	0.0714796	0.0836786	0.717993
Ischemic stroke	Olink	OID21476	O00244	ATOX1	Wald ratio	1	-0.168585	0.0975284	0.0838858	0.717993
Ischemic stroke	SomaScan	14123_34	Q9H7M9	C10orf54	Inverse variance weighted (fixed effects)	3	-0.0370262	0.0213989	0.0835789	0.717993
Cardioembolic stroke	Olink	OID20336	Q13867	BLMH	Wald ratio	1	0.0927474	0.053678	0.0840155	0.717993
Cardioembolic stroke	Olink	OID21528	P13688	CEACAM1	Wald ratio	1	-0.0967819	0.0559553	0.0836965	0.717993
Cardioembolic stroke	SomaScan	8841_65	Q8IUL8	CILP2	Wald ratio	1	0.333627	0.192782	0.0835243	0.717993
Large artery stroke	SomaScan	17325_10	Q16774	GUK1	Inverse variance weighted (fixed effects)	2	0.233091	0.13488	0.0839645	0.717993
Large artery stroke	SomaScan	12475_48	Q9NZA1	CLIC5	Inverse variance weighted (fixed effects)	3	0.274206	0.158689	0.0839978	0.717993
Small vessel stroke	SomaScan	5231_79	Q8NBP7	PCSK9	Inverse variance weighted (fixed effects)	2	0.199626	0.115476	0.0838586	0.717993
Small vessel stroke	SomaScan	5648_28	Q6GPI1	CTRB2	Inverse variance weighted (fixed effects)	4	0.0899452	0.0519762	0.0835395	0.717993
Small vessel stroke	SomaScan	12334_25	P34896	SHMT1	Inverse variance weighted (fixed effects)	2	0.0998946	0.0577994	0.0839347	0.717993
Large artery stroke	Olink	OID21333	Q8N386	LRRC25	Inverse variance weighted (fixed effects)	2	0.119227	0.069031	0.0841415	0.718093
Large artery stroke	SomaScan	15585_304	Q9UBX5	FBLN5	Wald ratio	1	-0.481526	0.278903	0.0842583	0.718093
Large artery stroke	SomaScan	15387_44	O60462	NRP2	Inverse variance weighted (fixed effects)	2	0.248226	0.14375	0.0842051	0.718093
Small vessel stroke	Olink	OID20102	P31997	CEACAM8	Wald ratio	1	-0.289495	0.167724	0.0843425	0.718093
Small vessel stroke	Olink	OID30362	P40199	CEACAM6	Wald ratio	1	-0.31434	0.182118	0.0843425	0.718093
Small vessel stroke	SomaScan	18873_8	P31997	CEACAM8	Wald ratio	1	-0.51289	0.297151	0.0843425	0.718093
Cardioembolic stroke	Olink	OID30413	P17900	GM2A	Inverse variance weighted (fixed effects)	3	0.0815526	0.0472627	0.0844338	0.718424
Small vessel stroke	SomaScan	5742_14	Q9NPH0	ACP6	Inverse variance weighted (fixed effects)	3	-0.0951257	0.0551569	0.0845927	0.719328
Large artery stroke	Olink	OID20300	Q9Y4L1	HYOU1	Wald ratio	1	0.201171	0.116668	0.0846539	0.7194
Ischemic stroke	Olink	OID30351	P05413	FABP3	Inverse variance weighted (fixed effects)	2	-0.134878	0.0782586	0.0847998	0.719745
Cardioembolic stroke	SomaScan	16621_77	Q8NCW5	APOA1BP	Wald ratio	1	-0.161724	0.0938258	0.0847696	0.719745
Small vessel stroke	Olink	OID30132	Q16836	HADH	Wald ratio	1	0.588241	0.341407	0.08489	0.720063
Cardioembolic stroke	SomaScan	15444_45	P48594	SERPINB4	Inverse variance weighted (fixed effects)	2	-0.286622	0.166408	0.0849958	0.720513
Small vessel stroke	SomaScan	14623_26	P55854	SUMO3	Wald ratio	1	0.62963	0.365741	0.0851567	0.72143
Cardioembolic stroke	Olink	OID30510	Q96PX8	SLITRK1	Wald ratio	1	0.235243	0.136695	0.0852635	0.72144
Cardioembolic stroke	SomaScan	15539_15	Q96PX8	SLITRK1	Wald ratio	1	0.45067	0.261876	0.0852635	0.72144
Ischemic stroke	Olink	OID30407	Q04721	NOTCH2	Wald ratio	1	-0.106891	0.0621594	0.0855004	0.722023
Cardioembolic stroke	Olink	OID21249	Q9BSW2	CRACR2A	Inverse variance weighted (fixed effects)	2	-0.186	0.108145	0.0854465	0.722023
Cardioembolic stroke	Olink	OID20406	P27487	DPP4	Wald ratio	1	0.126476	0.0735227	0.0853892	0.722023
Small vessel stroke	SomaScan	16079_2	P42680	TEC	Wald ratio	1	0.308608	0.179487	0.0855438	0.722023
Large artery stroke	Olink	OID30713	P26927	MST1	Wald ratio	1	0.160777	0.0935349	0.0856337	0.722336
Ischemic stroke	SomaScan	19233_75	O00244	ATOX1	Wald ratio	1	-0.179676	0.104566	0.0857401	0.722701
Cardioembolic stroke	SomaScan	5400_52	P48357	LEPR	Inverse variance weighted (fixed effects)	3	-0.062123	0.0361767	0.0859414	0.722701
Cardioembolic stroke	SomaScan	7089_42	Q9BT88	SYT11	Wald ratio	1	-0.462981	0.269497	0.085806	0.722701
Large artery stroke	Olink	OID20859	Q9Y2V2	CARHSP1	Wald ratio	1	0.493093	0.287101	0.0858899	0.722701
Large artery stroke	SomaScan	5105_2	Q9BZR6	RTN4R	Inverse variance weighted (fixed effects)	3	0.1216	0.0707983	0.0858791	0.722701
Cardioembolic stroke	SomaScan	5131_15	Q9NS68	TNFRSF19	Wald ratio	1	0.284211	0.16555	0.0860225	0.722892
Small vessel stroke	SomaScan	7994_41	Q86YB8	ERO1LB	Wald ratio	1	-0.207456	0.120866	0.0860856	0.722892
Small vessel stroke	SomaScan	14711_27	Q15828	CST6	Inverse variance weighted (fixed effects)	2	0.215835	0.125762	0.0861228	0.722892
Cardioembolic stroke	Olink	OID30694	P22897	MRC1	Inverse variance weighted (fixed effects)	3	-0.247127	0.144054	0.0862493	0.723509
Ischemic stroke	SomaScan	16609_106	Q6UWL6	KIRREL2	Inverse variance weighted (fixed effects)	3	-0.0473249	0.0275966	0.0863671	0.723564
Cardioembolic stroke	Olink	OID30608	Q6P5S2	C6orf58	Inverse variance weighted (fixed effects)	3	-0.0882133	0.0514823	0.0866265	0.723564
Large artery stroke	Olink	OID21126	Q9NPH3	IL1RAP	Inverse variance weighted (fixed effects)	2	-0.102767	0.0599755	0.0866226	0.723564
Large artery stroke	SomaScan	4468_21	Q9NRA0	SPHK2	Wald ratio	1	-0.632394	0.369014	0.0865764	0.723564
Small vessel stroke	SomaScan	7211_2	P07998	RNASE1	Inverse variance weighted (fixed effects)	2	0.181029	0.105553	0.0863361	0.723564
Small vessel stroke	SomaScan	9263_57	Q9HAT2	SIAE	Inverse variance weighted (fixed effects)	2	0.465135	0.271437	0.0866015	0.723564
Small vessel stroke	SomaScan	8687_26	Q9NUM4	TMEM106B	Wald ratio	1	-0.305556	0.178315	0.0866081	0.723564
Ischemic stroke	Olink	OID21060	P48052	CPA2	Inverse variance weighted (fixed effects)	2	-0.0386119	0.0225721	0.0871546	0.723827
Ischemic stroke	Olink	OID20306	Q13332	PTPRS	Inverse variance weighted (fixed effects)	2	-0.0427093	0.0249555	0.0870044	0.723827
Ischemic stroke	SomaScan	12008_3	P09564	CD7	Inverse variance weighted (fixed effects)	2	-0.0683816	0.0399619	0.08705	0.723827
Ischemic stroke	SomaScan	11187_11	Q5QGZ9	CLEC12A	Inverse variance weighted (fixed effects)	4	-0.02626	0.0153432	0.0869881	0.723827
Ischemic stroke	SomaScan	8364_74	Q9Y2C2	UST	Inverse variance weighted (fixed effects)	2	-0.0967223	0.0565097	0.0869695	0.723827
Cardioembolic stroke	Olink	OID20290	P16581	SELE	Wald ratio	1	0.307403	0.179583	0.08694	0.723827
Cardioembolic stroke	Olink	OID20174	P09417	QDPR	Inverse variance weighted (fixed effects)	2	-0.0723891	0.0423223	0.0871877	0.723827
Large artery stroke	Olink	OID30924	Q5VT99	LRRC38	Inverse variance weighted (fixed effects)	2	0.138924	0.0811856	0.0870471	0.723827
Small vessel stroke	SomaScan	7628_40	Q96HD1	CRELD1	Inverse variance weighted (fixed effects)	3	-0.0919203	0.0536753	0.0868	0.723827
Small vessel stroke	SomaScan	12684_5	Q9Y6U3	SCIN	Wald ratio	1	0.374861	0.219132	0.0871439	0.723827
Ischemic stroke	Olink	OID21469	Q8TDQ1	CD300LF	Inverse variance weighted (fixed effects)	4	-0.0330481	0.0193438	0.0875512	0.724159
Ischemic stroke	Olink	OID20139	P21549	AGXT	Inverse variance weighted (fixed effects)	2	-0.0427988	0.0250672	0.0877546	0.724159
Cardioembolic stroke	Olink	OID20732	Q8WU39	MZB1	Wald ratio	1	0.328003	0.192245	0.0879759	0.724159
Cardioembolic stroke	Olink	OID20508	Q06520	SULT2A1	Wald ratio	1	-0.09796	0.0574522	0.0881815	0.724159
Cardioembolic stroke	Olink	OID20677	P21709	EPHA1	Inverse variance weighted (fixed effects)	2	0.131552	0.077141	0.0881294	0.724159
Cardioembolic stroke	SomaScan	15562_24	P08236	GUSB	Inverse variance weighted (fixed effects)	2	-0.170739	0.0999461	0.087578	0.724159
Cardioembolic stroke	SomaScan	9829_91	Q06520	SULT2A1	Wald ratio	1	-0.174776	0.102504	0.0881815	0.724159
Cardioembolic stroke	SomaScan	7228_2	Q969X2	ST6GALNAC6	Wald ratio	1	-0.429957	0.252155	0.0881705	0.724159
Cardioembolic stroke	SomaScan	6433_57	Q96MK3	FAM20A	Inverse variance weighted (fixed effects)	2	-0.156442	0.0915765	0.0875774	0.724159
Large artery stroke	Olink	OID20178	O95544	NADK	Wald ratio	1	-0.186164	0.108926	0.0874341	0.724159
Large artery stroke	Olink	OID21096	P23280	CA6	Inverse variance weighted (fixed effects)	3	0.108704	0.063659	0.0877099	0.724159
Large artery stroke	Olink	OID20724	P25942	CD40	Wald ratio	1	-0.112745	0.0660445	0.0878011	0.724159
Large artery stroke	Olink	OID30712	P04040	CAT	Inverse variance weighted (fixed effects)	2	-0.197854	0.115967	0.0879842	0.724159
Large artery stroke	SomaScan	9005_16	Q9UIW2	PLXNA1	Inverse variance weighted (fixed effects)	2	0.167195	0.0980498	0.0881554	0.724159
Large artery stroke	SomaScan	16302_11	Q96DR5	BPIFA2	Wald ratio	1	0.481771	0.282552	0.0881815	0.724159
Large artery stroke	SomaScan	10070_22	P16885	PLCG2	Wald ratio	1	0.292907	0.17163	0.0878918	0.724159
Small vessel stroke	Olink	OID20465	Q99748	NRTN	Wald ratio	1	0.81577	0.478165	0.0879999	0.724159
Small vessel stroke	Olink	OID20763	Q16651	PRSS8	Wald ratio	1	-0.32367	0.189677	0.0879295	0.724159
Large artery stroke	SomaScan	4131_72	P02751	FN1	Wald ratio	1	-0.232386	0.136364	0.08835	0.725106
Ischemic stroke	SomaScan	9197_4	O00182	LGALS9	Wald ratio	1	0.10177	0.0597345	0.0884365	0.725381
Ischemic stroke	Olink	OID21376	Q99795	GPA33	Inverse variance weighted (fixed effects)	2	-0.0634357	0.037247	0.088548	0.72586
Ischemic stroke	SomaScan	4535_50	Q10588	BST1	Inverse variance weighted (fixed effects)	4	-0.0222335	0.0130663	0.0888314	0.726967
Cardioembolic stroke	SomaScan	11257_1	P09417	QDPR	Inverse variance weighted (fixed effects)	2	-0.0774794	0.045531	0.0888141	0.726967
Large artery stroke	SomaScan	3299_29	O94779	CNTN5	Inverse variance weighted (fixed effects)	2	0.155352	0.0913013	0.0888427	0.726967
Ischemic stroke	SomaScan	14112_40	Q969Z4	RELT	Wald ratio	1	0.245847	0.144518	0.0889149	0.727123
Cardioembolic stroke	Olink	OID31122	P54315	PNLIPRP1	Inverse variance weighted (fixed effects)	2	0.124329	0.0731385	0.0891472	0.727659
Cardioembolic stroke	Olink	OID30849	Q8WTQ1;Q8WTQ1	DEFB104B;DEFB104A	Wald ratio	1	-0.340096	0.200234	0.0894149	0.727659
Cardioembolic stroke	SomaScan	5900_11	P49773	HINT1	Wald ratio	1	-0.33299	0.195876	0.0891309	0.727659
Large artery stroke	Olink	OID31329	P49454	CENPF	Wald ratio	1	-0.683152	0.401948	0.0892053	0.727659
Large artery stroke	Olink	OID21174	Q7LG56	RRM2B	Wald ratio	1	-0.351773	0.207138	0.0894598	0.727659
Large artery stroke	SomaScan	8925_25	Q7LG56	RRM2B	Wald ratio	1	-0.250092	0.147264	0.0894598	0.727659
Small vessel stroke	Olink	OID20416	Q92820	GGH	Inverse variance weighted (fixed effects)	2	-0.103868	0.0611363	0.0893264	0.727659
Small vessel stroke	Olink	OID20894	Q9NQ88	TIGAR	Wald ratio	1	-0.616083	0.362402	0.0891309	0.727659
Small vessel stroke	SomaScan	3470_1	P16581	SELE	Wald ratio	1	0.307626	0.181109	0.0894013	0.727659
Large artery stroke	Olink	OID30871	Q12774	ARHGEF5	Inverse variance weighted (fixed effects)	2	0.0939503	0.0553354	0.0895392	0.727873
Cardioembolic stroke	SomaScan	2781_63	Q8NHW4	CCL4L1	Inverse variance weighted (fixed effects)	2	0.206909	0.121939	0.089731	0.728998
Small vessel stroke	SomaScan	13125_45	P04004	VTN	Inverse variance weighted (fixed effects)	2	-0.0710267	0.0418723	0.089835	0.729229
Small vessel stroke	SomaScan	19504_22	P23919	DTYMK	Wald ratio	1	0.663618	0.39126	0.0898662	0.729229
Ischemic stroke	Olink	OID30871	Q12774	ARHGEF5	Inverse variance weighted (fixed effects)	2	0.0324172	0.0191204	0.0899952	0.729843
Ischemic stroke	Olink	OID30631	P30047	GCHFR	Wald ratio	1	0.111133	0.0664978	0.0946757	0.730289
Ischemic stroke	Olink	OID30721	Q9NZP8	C1RL	Wald ratio	1	0.138883	0.0831112	0.0947113	0.730289
Ischemic stroke	Olink	OID20492	Q9BXJ7	AMN	Inverse variance weighted (fixed effects)	2	-0.0207612	0.0123932	0.0938923	0.730289
Ischemic stroke	Olink	OID31068	Q5SW96	LDLRAP1	Wald ratio	1	0.227008	0.134192	0.0907095	0.730289
Ischemic stroke	Olink	OID20309	P20160	AZU1	Wald ratio	1	-0.089193	0.0534685	0.0952876	0.730289
Ischemic stroke	Olink	OID20071	O95183	VAMP5	Wald ratio	1	-0.155391	0.0917666	0.090392	0.730289
Ischemic stroke	Olink	OID30326	Q6NUS6	TCTN3	Inverse variance weighted (fixed effects)	3	0.0228674	0.0137069	0.0952527	0.730289
Ischemic stroke	Olink	OID30114	Q92935	EXTL1	Inverse variance weighted (fixed effects)	2	-0.0405401	0.0240925	0.0924361	0.730289
Ischemic stroke	Olink	OID20117	P08319	ADH4	Wald ratio	1	-0.116884	0.0692073	0.0912407	0.730289
Ischemic stroke	Olink	OID21108	Q6YHK3	CD109	Inverse variance weighted (fixed effects)	3	0.0232024	0.013902	0.0951179	0.730289
Ischemic stroke	Olink	OID21164	Q7Z7D3	VTCN1	Wald ratio	1	-0.161397	0.0964669	0.0943122	0.730289
Ischemic stroke	Olink	OID21064	P57087	JAM2	Wald ratio	1	-0.17223	0.103131	0.0949194	0.730289
Ischemic stroke	Olink	OID30532	Q15399	TLR1	Inverse variance weighted (fixed effects)	3	-0.0341264	0.0202738	0.0923226	0.730289
Ischemic stroke	Olink	OID31403	Q9NUW8	TDP1	Wald ratio	1	0.134036	0.0792473	0.0907684	0.730289
Ischemic stroke	SomaScan	9525_1	Q13308	PTK7	Wald ratio	1	0.146953	0.0872162	0.0920018	0.730289
Ischemic stroke	SomaScan	18183_3	Q5SW96	LDLRAP1	Wald ratio	1	0.151889	0.0897868	0.0907095	0.730289
Ischemic stroke	SomaScan	16605_2	P0C862	C1QTNF9	Wald ratio	1	0.0631579	0.037799	0.0947442	0.730289
Ischemic stroke	SomaScan	18174_79	Q8WUM4	PDCD6IP	Wald ratio	1	-0.120428	0.0713649	0.0915072	0.730289
Ischemic stroke	SomaScan	5736_1	Q5T2D2	TREML2	Inverse variance weighted (fixed effects)	3	-0.0306622	0.0181578	0.0912871	0.730289
Ischemic stroke	SomaScan	7173_141	Q8N3T6	TMEM132C	Inverse variance weighted (fixed effects)	3	0.0414416	0.0247879	0.0945537	0.730289
Ischemic stroke	SomaScan	9906_21	Q9BQ16	SPOCK3	Inverse variance weighted (fixed effects)	3	0.0321908	0.0190237	0.0906185	0.730289
Cardioembolic stroke	Olink	OID30488	Q8NHP1	AKR7L	Wald ratio	1	0.152861	0.0912746	0.0939852	0.730289
Cardioembolic stroke	Olink	OID31482	Q14258	TRIM25	Wald ratio	1	-0.32585	0.193505	0.0921937	0.730289
Cardioembolic stroke	Olink	OID21463	O15123	ANGPT2	Inverse variance weighted (fixed effects)	2	-0.140104	0.0830382	0.0915602	0.730289
Cardioembolic stroke	Olink	OID30719	P07358	C8B	Inverse variance weighted (fixed effects)	2	0.0914814	0.0546387	0.0940725	0.730289
Cardioembolic stroke	Olink	OID30539	Q96PL5	ERMAP	Wald ratio	1	-0.297959	0.176568	0.0915072	0.730289
Cardioembolic stroke	Olink	OID20444	Q9Y478	PRKAB1	Wald ratio	1	0.164255	0.0969773	0.0903128	0.730289
Cardioembolic stroke	Olink	OID20358	P07339	CTSD	Inverse variance weighted (fixed effects)	2	-0.0863075	0.0514714	0.0935802	0.730289
Cardioembolic stroke	Olink	OID30315	Q9BXN1	ASPN	Wald ratio	1	0.109132	0.065246	0.0944023	0.730289
Cardioembolic stroke	Olink	OID31078	P13995	MTHFD2	Wald ratio	1	0.514009	0.306447	0.0934797	0.730289
Cardioembolic stroke	SomaScan	7861_9	Q01974	ROR2	Inverse variance weighted (fixed effects)	2	0.171783	0.101601	0.0908845	0.730289
Cardioembolic stroke	SomaScan	12356_65	P30626	SRI	Wald ratio	1	0.244626	0.146034	0.0939093	0.730289
Cardioembolic stroke	SomaScan	2418_55	P02649	APOE	Inverse variance weighted (fixed effects)	2	0.135676	0.0807067	0.0927424	0.730289
Cardioembolic stroke	SomaScan	4131_72	P02751	FN1	Wald ratio	1	-0.188636	0.1125	0.0935879	0.730289
Cardioembolic stroke	SomaScan	15339_32	Q9Y281	CFL2	Wald ratio	1	0.243823	0.145644	0.0941095	0.730289
Cardioembolic stroke	SomaScan	10037_98	Q96PQ1	SIGLEC12	Inverse variance weighted (fixed effects)	5	-0.0585277	0.0346601	0.0912922	0.730289
Cardioembolic stroke	SomaScan	18917_53	P04746	AMY2A	Inverse variance weighted (fixed effects)	2	0.0817988	0.0486358	0.0925957	0.730289
Cardioembolic stroke	SomaScan	15633_6	P02753	RBP4	Wald ratio	1	-0.347368	0.208187	0.0952087	0.730289
Cardioembolic stroke	SomaScan	9981_18	A2RU67	KIAA1467	Inverse variance weighted (fixed effects)	2	-0.195902	0.116021	0.0913139	0.730289
Cardioembolic stroke	SomaScan	18891_98	P32456	GBP2	Wald ratio	1	-0.375661	0.222222	0.0909369	0.730289
Large artery stroke	Olink	OID20968	Q92765	FRZB	Inverse variance weighted (fixed effects)	2	-0.0845307	0.0504394	0.0937606	0.730289
Large artery stroke	Olink	OID30244	Q8IVF2	AHNAK2	Inverse variance weighted (fixed effects)	2	-0.167525	0.100064	0.0940973	0.730289
Large artery stroke	Olink	OID30362	P40199	CEACAM6	Wald ratio	1	0.333466	0.198749	0.0933814	0.730289
Large artery stroke	Olink	OID21064	P57087	JAM2	Wald ratio	1	-0.546597	0.323833	0.0914308	0.730289
Large artery stroke	Olink	OID31128	P32455	GBP1	Inverse variance weighted (fixed effects)	2	-0.142557	0.0847561	0.0925763	0.730289
Large artery stroke	Olink	OID20149	Q6GTS8	PM20D1	Inverse variance weighted (fixed effects)	2	-0.0782962	0.0462838	0.0907121	0.730289
Large artery stroke	Olink	OID30638	O96007	MOCS2	Inverse variance weighted (fixed effects)	2	0.120003	0.0715555	0.0935308	0.730289
Large artery stroke	Olink	OID30740	P0DOY2	IGLC2	Inverse variance weighted (fixed effects)	2	0.220313	0.132032	0.0951904	0.730289
Large artery stroke	Olink	OID20258	Q06141	REG3A	Inverse variance weighted (fixed effects)	3	0.161809	0.0967139	0.0943139	0.730289
Large artery stroke	Olink	OID20373	Q99969	RARRES2	Wald ratio	1	0.198162	0.117601	0.091981	0.730289
Large artery stroke	Olink	OID20092	Q99549	MPHOSPH8	Wald ratio	1	-1.09899	0.656216	0.0939852	0.730289
Large artery stroke	Olink	OID30268	Q16621	NFE2	Wald ratio	1	-0.546894	0.326617	0.0940484	0.730289
Large artery stroke	Olink	OID20723	Q96PL1	SCGB3A2	Inverse variance weighted (fixed effects)	3	-0.147724	0.0884611	0.0949333	0.730289
Large artery stroke	Olink	OID31476	Q96RF0	SNX18	Wald ratio	1	0.463686	0.275929	0.0928696	0.730289
Large artery stroke	Olink	OID30279	Q96DR5	BPIFA2	Wald ratio	1	0.307047	0.18399	0.0951529	0.730289
Large artery stroke	Olink	OID20572	Q9GZT9	EGLN1	Inverse variance weighted (fixed effects)	2	0.254427	0.151299	0.092643	0.730289
Large artery stroke	Olink	OID30556	Q15762	CD226	Inverse variance weighted (fixed effects)	2	-0.125889	0.0745538	0.0913026	0.730289
Large artery stroke	Olink	OID20102	P31997	CEACAM8	Wald ratio	1	0.30711	0.183041	0.0933814	0.730289
Large artery stroke	Olink	OID21419	Q9H6B4	CLMP	Inverse variance weighted (fixed effects)	2	-0.124073	0.0738823	0.0930884	0.730289
Large artery stroke	Olink	OID30290	Q9BVM4	GGACT	Wald ratio	1	0.101378	0.0600758	0.0915072	0.730289
Large artery stroke	SomaScan	16288_17	P54764	EPHA4	Inverse variance weighted (fixed effects)	2	0.247616	0.146962	0.092008	0.730289
Large artery stroke	SomaScan	13954_9	Q96EK6	GNPNAT1	Wald ratio	1	0.612536	0.363723	0.0921675	0.730289
Large artery stroke	SomaScan	2855_49	P27361	MAPK3	Wald ratio	1	0.158531	0.0947017	0.0941289	0.730289
Large artery stroke	SomaScan	19237_17	P30046	DDT	Wald ratio	1	-0.309565	0.185281	0.0947635	0.730289
Large artery stroke	SomaScan	5238_26	Q9UNP9	PPIE	Wald ratio	1	0.148329	0.0880919	0.0922214	0.730289
Large artery stroke	SomaScan	12411_60	P61244	MAX	Wald ratio	1	0.208473	0.124861	0.09499	0.730289
Large artery stroke	SomaScan	5465_32	O60243	HS6ST1	Inverse variance weighted (fixed effects)	2	-0.235958	0.140394	0.0928246	0.730289
Large artery stroke	SomaScan	18873_8	P31997	CEACAM8	Wald ratio	1	0.544098	0.324288	0.0933814	0.730289
Large artery stroke	SomaScan	5103_30	Q8TD46	CD200R1	Wald ratio	1	0.337674	0.201389	0.0935964	0.730289
Small vessel stroke	Olink	OID21017	P15311	EZR	Wald ratio	1	-0.406741	0.24286	0.0939741	0.730289
Small vessel stroke	Olink	OID20150	Q53H82	LACTB2	Wald ratio	1	-0.271636	0.161826	0.0932356	0.730289
Small vessel stroke	Olink	OID31394	Q6B8I1	DUSP13	Wald ratio	1	-0.130428	0.0780305	0.0946234	0.730289
Small vessel stroke	Olink	OID31522	Q9NPJ3	ACOT13	Wald ratio	1	-0.575306	0.342799	0.0932962	0.730289
Small vessel stroke	Olink	OID21093	P55103	INHBC	Inverse variance weighted (fixed effects)	3	0.105567	0.0628886	0.0932228	0.730289
Small vessel stroke	Olink	OID20340	P19961	AMY2B	Inverse variance weighted (fixed effects)	3	-0.101425	0.0599993	0.0909446	0.730289
Small vessel stroke	Olink	OID20691	P25116	F2R	Wald ratio	1	0.3374	0.200599	0.0925752	0.730289
Small vessel stroke	Olink	OID20174	P09417	QDPR	Inverse variance weighted (fixed effects)	2	-0.0883472	0.0524316	0.0919887	0.730289
Small vessel stroke	Olink	OID30689	Q93091	RNASE6	Inverse variance weighted (fixed effects)	2	-0.0889376	0.0526792	0.091356	0.730289
Small vessel stroke	Olink	OID20169	P18827	SDC1	Inverse variance weighted (fixed effects)	2	-0.235836	0.139738	0.0914687	0.730289
Small vessel stroke	Olink	OID20383	P98160	HSPG2	Inverse variance weighted (fixed effects)	2	-0.199029	0.119273	0.0951795	0.730289
Small vessel stroke	Olink	OID20774	Q14118	DAG1	Wald ratio	1	-0.641339	0.38211	0.0932663	0.730289
Small vessel stroke	SomaScan	5012_67	P00568	AK1	Wald ratio	1	0.728785	0.434276	0.0933157	0.730289
Small vessel stroke	SomaScan	7866_11	Q96LL9	DNAJC30	Wald ratio	1	0.252629	0.151179	0.0947113	0.730289
Small vessel stroke	SomaScan	5060_62	Q9NZQ7	CD274	Wald ratio	1	-0.155528	0.0928218	0.0938253	0.730289
Small vessel stroke	SomaScan	3710_49	P00747	PLG	Inverse variance weighted (fixed effects)	2	0.138234	0.0827563	0.094846	0.730289
Small vessel stroke	SomaScan	10714_7	P12821	ACE	Inverse variance weighted (fixed effects)	2	0.0692241	0.0411616	0.0926142	0.730289
Small vessel stroke	SomaScan	8890_9	Q14DG7	TMEM132B	Wald ratio	1	-0.26738	0.1589	0.0924347	0.730289
Small vessel stroke	SomaScan	5708_1	Q969E1	LEAP2	Wald ratio	1	-0.111333	0.06665	0.0948379	0.730289
Small vessel stroke	SomaScan	5465_32	O60243	HS6ST1	Inverse variance weighted (fixed effects)	2	-0.22025	0.131918	0.0949976	0.730289
Small vessel stroke	SomaScan	8288_27	P02749	APOH	Wald ratio	1	0.250454	0.148698	0.0921203	0.730289
Small vessel stroke	SomaScan	3363_31	P41240	CSK	Wald ratio	1	0.545588	0.325	0.0932041	0.730289
Small vessel stroke	SomaScan	7871_16	Q24JP5	TMEM132A	Inverse variance weighted (fixed effects)	2	-0.0995282	0.0588231	0.0906476	0.730289
Small vessel stroke	SomaScan	15626_223	P98160	HSPG2	Inverse variance weighted (fixed effects)	2	-0.141899	0.0838884	0.0907384	0.730289
Small vessel stroke	SomaScan	13738_8	P08476	INHBA	Wald ratio	1	-0.401058	0.239153	0.0935442	0.730289
Small vessel stroke	SomaScan	6527_1	Q7L0X0	TRIL	Wald ratio	1	-0.466165	0.277256	0.0926938	0.730289
Small vessel stroke	SomaScan	5763_67	Q8WTQ1	DEFB104A	Inverse variance weighted (fixed effects)	2	-0.373849	0.220838	0.0904808	0.730289
Small vessel stroke	SomaScan	16055_3	Q9BXR6	CFHR5	Inverse variance weighted (fixed effects)	3	-0.101168	0.060121	0.0924253	0.730289
Small vessel stroke	SomaScan	4831_4	P14151	SELL	Inverse variance weighted (fixed effects)	3	-0.0931347	0.055104	0.090997	0.730289
Ischemic stroke	Olink	OID20861	P39905	GDNF	Inverse variance weighted (fixed effects)	2	-0.0486956	0.0292149	0.0955524	0.730896
Ischemic stroke	Olink	OID20726	Q9UKU9	ANGPTL2	Wald ratio	1	-0.255163	0.153098	0.0955807	0.730896
Large artery stroke	SomaScan	13536_56	Q9UNA4	POLI	Wald ratio	1	0.66055	0.39633	0.0955807	0.730896
Large artery stroke	SomaScan	2677_1	P00533	EGFR	Inverse variance weighted (fixed effects)	2	-0.308082	0.184821	0.0955305	0.730896
Small vessel stroke	Olink	OID20345	Q6EMK4	VASN	Wald ratio	1	-0.102105	0.0612849	0.0957005	0.731402
Ischemic stroke	SomaScan	17675_17	Q9NPJ3	ACOT13	Wald ratio	1	0.277631	0.166777	0.0959761	0.732689
Cardioembolic stroke	Olink	OID20489	P32456	GBP2	Wald ratio	1	-0.259544	0.155887	0.095923	0.732689
Cardioembolic stroke	Olink	OID20535	P13232	IL7	Wald ratio	1	-0.252242	0.151564	0.0960605	0.732924
Large artery stroke	SomaScan	19606_28	Q14623	IHH	Wald ratio	1	0.681176	0.409412	0.0961538	0.733226
Ischemic stroke	SomaScan	8465_52	P09668	CTSH	Inverse variance weighted (fixed effects)	3	-0.0225649	0.0135801	0.0965903	0.733281
Cardioembolic stroke	Olink	OID30730	P20742	PZP	Wald ratio	1	0.682913	0.410738	0.0963824	0.733281
Cardioembolic stroke	Olink	OID20407	Q9Y5C1	ANGPTL3	Wald ratio	1	-0.097318	0.0585294	0.0963681	0.733281
Cardioembolic stroke	Olink	OID30697	P17927	CR1	Inverse variance weighted (fixed effects)	3	-0.108435	0.0652138	0.0963599	0.733281
Cardioembolic stroke	Olink	OID21405	O60911	CTSV	Inverse variance weighted (fixed effects)	2	0.141967	0.0854373	0.0965834	0.733281
Large artery stroke	SomaScan	5012_67	P00568	AK1	Wald ratio	1	-0.75208	0.452579	0.09656	0.733281
Large artery stroke	SomaScan	12714_38	O75843	AP1G2	Wald ratio	1	-0.26729	0.1607	0.0962542	0.733281
Small vessel stroke	SomaScan	11649_3	Q8IYB5	SMAP1	Inverse variance weighted (fixed effects)	2	0.113921	0.0685499	0.0965392	0.733281
Ischemic stroke	SomaScan	4548_4	P21217	FUT3	Inverse variance weighted (fixed effects)	4	-0.0281002	0.0169191	0.0967411	0.734019
Small vessel stroke	SomaScan	15486_126	P19801	AOC1	Inverse variance weighted (fixed effects)	3	0.0799249	0.0481398	0.096861	0.734521
Large artery stroke	SomaScan	8402_22	Q9NRR1	CYTL1	Inverse variance weighted (fixed effects)	2	-0.104974	0.0632395	0.0969257	0.734603
Small vessel stroke	SomaScan	8992_1	Q9UHN6	TMEM2	Wald ratio	1	-0.226716	0.136642	0.0970769	0.735342
Cardioembolic stroke	Olink	OID30150	P10082	PYY	Wald ratio	1	-0.113266	0.0682865	0.0971798	0.735351
Cardioembolic stroke	Olink	OID30632	Q53FA7	TP53I3	Inverse variance weighted (fixed effects)	2	-0.0643964	0.0388245	0.0971857	0.735351
Ischemic stroke	Olink	OID20481	Q8TAD2	IL17D	Inverse variance weighted (fixed effects)	2	-0.0377338	0.0227591	0.0973249	0.735996
Small vessel stroke	SomaScan	8310_6	Q96DA0	ZG16B	Wald ratio	1	-0.206504	0.124661	0.0976162	0.737791
Ischemic stroke	Olink	OID20674	O15444	CCL25	Inverse variance weighted (fixed effects)	3	0.0339964	0.0205353	0.0978206	0.737849
Ischemic stroke	Olink	OID20947	Q9H3S3	TMPRSS5	Inverse variance weighted (fixed effects)	2	0.0226141	0.0136659	0.0979688	0.737849
Ischemic stroke	SomaScan	10809_14	Q12918	KLRB1	Wald ratio	1	-0.352141	0.21278	0.0979342	0.737849
Large artery stroke	SomaScan	8221_19	P14174	MIF	Wald ratio	1	0.603221	0.364568	0.0980019	0.737849
Small vessel stroke	Olink	OID31491	P17181	IFNAR1	Inverse variance weighted (fixed effects)	2	-0.0922928	0.0557267	0.0976876	0.737849
Small vessel stroke	Olink	OID30423	Q7Z698	SPRED2	Wald ratio	1	0.464084	0.280384	0.0978895	0.737849
Small vessel stroke	SomaScan	15441_6	P17900	GM2A	Inverse variance weighted (fixed effects)	2	0.132094	0.0798178	0.0979353	0.737849
Large artery stroke	Olink	OID20607	Q9UIB8	CD84	Wald ratio	1	0.297693	0.179978	0.0981165	0.737899
Small vessel stroke	Olink	OID21081	O60462	NRP2	Inverse variance weighted (fixed effects)	3	0.169478	0.102446	0.0980644	0.737899
Ischemic stroke	SomaScan	6493_9	Q66K79	CPZ	Wald ratio	1	0.184524	0.111607	0.098263	0.738424
Cardioembolic stroke	SomaScan	9212_22	Q9UBX1	CTSF	Wald ratio	1	-0.155266	0.0939197	0.0982944	0.738424
Ischemic stroke	Olink	OID21163	Q7Z6M1	RABEPK	Wald ratio	1	0.0819814	0.0496711	0.0988437	0.738865
Ischemic stroke	SomaScan	6359_50	Q8NAT1	POMGNT2	Inverse variance weighted (fixed effects)	2	0.0377228	0.0228494	0.0987529	0.738865
Cardioembolic stroke	Olink	OID30561	Q9H7Z7	PTGES2	Wald ratio	1	0.439872	0.266211	0.0984645	0.738865
Cardioembolic stroke	Olink	OID30716	Q9BXR6	CFHR5	Inverse variance weighted (fixed effects)	3	0.083622	0.0506343	0.0986389	0.738865
Cardioembolic stroke	Olink	OID21362	Q9UBM4	OPTC	Wald ratio	1	0.218516	0.132312	0.0986334	0.738865
Cardioembolic stroke	SomaScan	5091_28	Q8N423	LILRB2	Inverse variance weighted (fixed effects)	4	-0.0598541	0.0362559	0.0987635	0.738865
Cardioembolic stroke	SomaScan	18458_4	Q9H7Z7	PTGES2	Wald ratio	1	0.460283	0.278564	0.0984645	0.738865
Large artery stroke	SomaScan	11493_169	Q96FJ2	DYNLL2	Wald ratio	1	0.683544	0.414105	0.098809	0.738865
Small vessel stroke	Olink	OID20987	P56279	TCL1A	Inverse variance weighted (fixed effects)	2	0.129745	0.078622	0.0988938	0.738865
Small vessel stroke	SomaScan	17698_15	Q969T9	WBP2	Wald ratio	1	-0.718531	0.435315	0.0988198	0.738865
Ischemic stroke	Olink	OID20287	P17813	ENG	Wald ratio	1	-0.0811723	0.0492215	0.0991225	0.740169
Ischemic stroke	Olink	OID20235	Q8NBP7	PCSK9	Inverse variance weighted (fixed effects)	2	0.0397055	0.0241011	0.0994637	0.740671
Ischemic stroke	Olink	OID31513	Q9H2K0	MTIF3	Wald ratio	1	0.133161	0.0808151	0.0994086	0.740671
Ischemic stroke	SomaScan	16055_3	Q9BXR6	CFHR5	Inverse variance weighted (fixed effects)	2	-0.0431489	0.0261951	0.0995149	0.740671
Cardioembolic stroke	SomaScan	11540_37	O43524	FOXO3	Wald ratio	1	0.525237	0.318612	0.0992471	0.740671
Cardioembolic stroke	SomaScan	18188_12	P50440	GATM	Wald ratio	1	-0.162893	0.0988404	0.0993435	0.740671
Small vessel stroke	SomaScan	7970_315	Q13508	ART3	Inverse variance weighted (fixed effects)	3	0.132906	0.0806659	0.0994315	0.740671
Small vessel stroke	SomaScan	3484_60	P01019	AGT	Inverse variance weighted (fixed effects)	2	0.178716	0.10855	0.0996823	0.741513
Ischemic stroke	Olink	OID31137	O95954	FTCD	Wald ratio	1	-0.255877	0.155533	0.0999366	0.741969
Ischemic stroke	SomaScan	11616_9	Q00613	HSF1	Wald ratio	1	0.195618	0.118936	0.100024	0.741969
Cardioembolic stroke	Olink	OID30386	Q6IBS0	TWF2	Wald ratio	1	-0.509786	0.310056	0.100141	0.741969
Cardioembolic stroke	SomaScan	12008_3	P09564	CD7	Wald ratio	1	-0.16129	0.098109	0.100178	0.741969
Large artery stroke	SomaScan	4866_59	Q16620	NTRK2	Wald ratio	1	0.576246	0.35044	0.100104	0.741969
Small vessel stroke	Olink	OID21126	Q9NPH3	IL1RAP	Inverse variance weighted (fixed effects)	2	-0.0901613	0.0548053	0.099945	0.741969
Small vessel stroke	SomaScan	4337_49	P02741	CRP	Wald ratio	1	0.20765	0.12629	0.100129	0.741969
Small vessel stroke	SomaScan	11257_1	P09417	QDPR	Inverse variance weighted (fixed effects)	2	-0.0927431	0.0564021	0.10011	0.741969
Cardioembolic stroke	Olink	OID21012	Q8NBS9	TXNDC5	Wald ratio	1	-0.264974	0.161261	0.100355	0.74207
Large artery stroke	Olink	OID20610	P10147	CCL3	Inverse variance weighted (fixed effects)	2	0.107011	0.0651255	0.100351	0.74207
Small vessel stroke	SomaScan	13552_7	Q9UH65	SWAP70	Inverse variance weighted (fixed effects)	2	-0.0803606	0.048905	0.100342	0.74207
Small vessel stroke	Olink	OID21294	Q9Y653	ADGRG1	Wald ratio	1	0.485817	0.295715	0.100412	0.742097
Ischemic stroke	Olink	OID30405	Q9H2X3	CLEC4M	Inverse variance weighted (fixed effects)	2	-0.0324501	0.0197763	0.100827	0.742174
Ischemic stroke	Olink	OID20622	Q6UXB2	CXCL17	Wald ratio	1	0.182319	0.111088	0.100751	0.742174
Ischemic stroke	SomaScan	4158_54	P00749	PLAU	Wald ratio	1	-0.0445838	0.0271682	0.100792	0.742174
Cardioembolic stroke	Olink	OID30909	P61366	OSTN	Wald ratio	1	-0.27918	0.170185	0.100912	0.742174
Cardioembolic stroke	Olink	OID20266	P48304	REG1B	Inverse variance weighted (fixed effects)	3	-0.0751788	0.0458234	0.100876	0.742174
Cardioembolic stroke	Olink	OID21250	Q9UQB8	BAIAP2	Wald ratio	1	0.384436	0.234233	0.100744	0.742174
Large artery stroke	Olink	OID30205	Q8TER0	SNED1	Inverse variance weighted (fixed effects)	2	-0.224951	0.137093	0.100827	0.742174
Large artery stroke	SomaScan	6455_52	Q86UW8	HAPLN4	Wald ratio	1	0.411556	0.250667	0.100622	0.742174
Small vessel stroke	Olink	OID21258	Q8IUK5	PLXDC1	Inverse variance weighted (fixed effects)	2	-0.145999	0.0889431	0.100695	0.742174
Ischemic stroke	SomaScan	19267_14	Q16775	HAGH	Wald ratio	1	0.077395	0.0471921	0.101005	0.742183
Cardioembolic stroke	SomaScan	5731_1	Q6UWN8	SPINK6	Inverse variance weighted (fixed effects)	3	-0.0766137	0.0467179	0.101022	0.742183
Small vessel stroke	Olink	OID21212	O00221	NFKBIE	Wald ratio	1	-0.165321	0.100838	0.101116	0.742475
Cardioembolic stroke	Olink	OID21029	Q10589	BST2	Inverse variance weighted (fixed effects)	2	0.18917	0.115433	0.101258	0.743119
Large artery stroke	SomaScan	19376_74	P40261	NNMT	Wald ratio	1	-0.642857	0.392465	0.101422	0.743922
Ischemic stroke	SomaScan	4209_60	Q9NP79	VTA1	Wald ratio	1	-0.243952	0.149194	0.102021	0.744066
Ischemic stroke	SomaScan	14101_2	P26992	CNTFR	Inverse variance weighted (fixed effects)	2	0.0582356	0.03558	0.101683	0.744066
Cardioembolic stroke	SomaScan	13959_7	P28838	LAP3	Wald ratio	1	0.609503	0.37268	0.101953	0.744066
Cardioembolic stroke	SomaScan	3194_36	Q9HCN6	GP6	Wald ratio	1	0.0995236	0.0608788	0.102095	0.744066
Large artery stroke	Olink	OID20362	P14543	NID1	Wald ratio	1	0.304373	0.185876	0.101526	0.744066
Small vessel stroke	Olink	OID20726	Q9UKU9	ANGPTL2	Wald ratio	1	-0.67436	0.411907	0.101595	0.744066
Small vessel stroke	Olink	OID31033	Q96PE7	MCEE	Wald ratio	1	0.174343	0.106632	0.102049	0.744066
Small vessel stroke	Olink	OID30312	P54687	BCAT1	Inverse variance weighted (fixed effects)	2	0.106222	0.0649212	0.101806	0.744066
Small vessel stroke	Olink	OID31473	Q6NUJ1	PSAPL1	Inverse variance weighted (fixed effects)	2	-0.0949241	0.0580369	0.101927	0.744066
Small vessel stroke	SomaScan	19437_61	P15692	VEGFA	Inverse variance weighted (fixed effects)	3	-0.0744057	0.0455049	0.102025	0.744066
Small vessel stroke	SomaScan	2590_69	Q01973	ROR1	Inverse variance weighted (fixed effects)	2	-0.138574	0.0846494	0.101624	0.744066
Small vessel stroke	SomaScan	9848_22	P51946	CCNH	Wald ratio	1	-0.400831	0.245067	0.101925	0.744066
Ischemic stroke	Olink	OID30543	P09564	CD7	Inverse variance weighted (fixed effects)	2	-0.053274	0.0326036	0.10226	0.744304
Ischemic stroke	Olink	OID20489	P32456	GBP2	Wald ratio	1	-0.114103	0.0699082	0.102641	0.744304
Ischemic stroke	SomaScan	5231_79	Q8NBP7	PCSK9	Inverse variance weighted (fixed effects)	3	0.0454496	0.0278343	0.102498	0.744304
Ischemic stroke	SomaScan	8250_2	Q12913	PTPRJ	Wald ratio	1	0.181077	0.11093	0.102605	0.744304
Cardioembolic stroke	Olink	OID20079	P62736	ACTA2	Wald ratio	1	0.428478	0.262401	0.102488	0.744304
Cardioembolic stroke	Olink	OID20528	P23229	ITGA6	Inverse variance weighted (fixed effects)	2	0.120591	0.0738308	0.102397	0.744304
Cardioembolic stroke	SomaScan	2911_27	P21741	MDK	Wald ratio	1	-0.43345	0.265324	0.10233	0.744304
Cardioembolic stroke	SomaScan	8427_118	Q9BXY4	RSPO3	Inverse variance weighted (fixed effects)	2	0.103575	0.0634638	0.102672	0.744304
Small vessel stroke	Olink	OID30277	Q8IWT1	SCN4B	Inverse variance weighted (fixed effects)	2	-0.111124	0.0680831	0.102641	0.744304
Small vessel stroke	SomaScan	13118_5	Q9H4F8	SMOC1	Inverse variance weighted (fixed effects)	3	-0.16839	0.103093	0.102389	0.744304
Ischemic stroke	Olink	OID31149	P54252	ATXN3	Wald ratio	1	0.0446459	0.0273741	0.1029	0.744774
Ischemic stroke	SomaScan	6485_59	P15814	IGLL1	Inverse variance weighted (fixed effects)	2	-0.0374024	0.0229303	0.102862	0.744774
Small vessel stroke	Olink	OID20768	P36941	LTBR	Wald ratio	1	0.117937	0.072305	0.102867	0.744774
Ischemic stroke	SomaScan	17814_8	O95861	BPNT1	Wald ratio	1	0.21045	0.129173	0.103268	0.746309
Cardioembolic stroke	Olink	OID21299	O94760	DDAH1	Inverse variance weighted (fixed effects)	2	0.157762	0.0968444	0.103308	0.746309
Cardioembolic stroke	SomaScan	17856_23	Q9NPB1	NT5M	Wald ratio	1	0.234478	0.143947	0.103331	0.746309
Large artery stroke	Olink	OID30285	P09543	CNP	Wald ratio	1	-0.473477	0.290649	0.103306	0.746309
Ischemic stroke	SomaScan	18188_12	P50440	GATM	Wald ratio	1	-0.070127	0.0430701	0.103481	0.747001
Ischemic stroke	Olink	OID30564	O60437	PPL	Wald ratio	1	0.169202	0.104012	0.103788	0.747634
Ischemic stroke	SomaScan	17794_6	O15305	PMM2	Inverse variance weighted (fixed effects)	2	0.0827553	0.0508565	0.103688	0.747634
Ischemic stroke	SomaScan	11441_11	P06737	PYGL	Wald ratio	1	-0.107106	0.0658307	0.10374	0.747634
Large artery stroke	SomaScan	11616_9	Q00613	HSF1	Wald ratio	1	0.621283	0.381847	0.103727	0.747634
Ischemic stroke	Olink	OID21232	P04637	TP53	Wald ratio	1	-0.198302	0.122032	0.104163	0.748278
Ischemic stroke	SomaScan	5631_83	P12872	MLN	Inverse variance weighted (fixed effects)	2	0.118908	0.0732021	0.104296	0.748278
Ischemic stroke	SomaScan	3184_25	P08709	F7	Inverse variance weighted (fixed effects)	3	0.0293008	0.0180444	0.104415	0.748278
Ischemic stroke	SomaScan	3403_1	P20231	TPSB2	Inverse variance weighted (fixed effects)	4	0.028067	0.0172824	0.104371	0.748278
Ischemic stroke	SomaScan	2474_54	P02743	APCS	Inverse variance weighted (fixed effects)	2	-0.0546956	0.0336737	0.104315	0.748278
Cardioembolic stroke	Olink	OID30527	Q99062	CSF3R	Wald ratio	1	0.14367	0.0884517	0.104317	0.748278
Cardioembolic stroke	Olink	OID31094	Q5VV43	KIAA0319	Inverse variance weighted (fixed effects)	3	-0.0827229	0.0509041	0.104147	0.748278
Cardioembolic stroke	SomaScan	2973_15	P16671	CD36	Inverse variance weighted (fixed effects)	2	0.156255	0.0962349	0.104444	0.748278
Large artery stroke	Olink	OID20367	Q9BXJ1	C1QTNF1	Wald ratio	1	-0.157993	0.0972074	0.104094	0.748278
Large artery stroke	SomaScan	10620_21	P08118	MSMB	Inverse variance weighted (fixed effects)	2	0.0861024	0.0529655	0.104028	0.748278
Small vessel stroke	SomaScan	6382_17	O00462	MANBA	Inverse variance weighted (fixed effects)	3	-0.0898689	0.0553546	0.10448	0.748278
Ischemic stroke	Olink	OID30259	Q92835	INPP5D	Wald ratio	1	-0.0753637	0.0464506	0.104707	0.749515
Cardioembolic stroke	Olink	OID31004	P22102	GART	Wald ratio	1	0.23954	0.147768	0.105006	0.750686
Large artery stroke	Olink	OID20687	P09238	MMP10	Inverse variance weighted (fixed effects)	2	-0.120434	0.0743	0.105036	0.750686
Large artery stroke	Olink	OID20098	P40225	THPO	Wald ratio	1	0.677072	0.417689	0.105018	0.750686
Large artery stroke	SomaScan	3651_50	P35968	KDR	Inverse variance weighted (fixed effects)	2	0.24018	0.148231	0.105166	0.751225
Ischemic stroke	Olink	OID30925	P63172	DYNLT1	Wald ratio	1	0.143007	0.0882914	0.105293	0.751345
Ischemic stroke	SomaScan	9126_171	Q86UY8	NT5DC3	Wald ratio	1	0.0686977	0.0424134	0.105293	0.751345
Ischemic stroke	Olink	OID30696	P12821	ACE	Inverse variance weighted (fixed effects)	3	0.0330797	0.0204368	0.105526	0.752551
Ischemic stroke	Olink	OID20783	Q92956	TNFRSF14	Wald ratio	1	0.107148	0.0662056	0.105572	0.752551
Ischemic stroke	Olink	OID20377	P08174	CD55	Inverse variance weighted (fixed effects)	2	-0.033384	0.0207384	0.107448	0.752964
Ischemic stroke	Olink	OID30560	O15400	STX7	Inverse variance weighted (fixed effects)	3	-0.0298662	0.0185143	0.106714	0.752964
Ischemic stroke	SomaScan	11547_84	O15146	MUSK	Wald ratio	1	-0.17737	0.110092	0.107156	0.752964
Ischemic stroke	SomaScan	10959_125	Q9NYM9	BET1L	Wald ratio	1	-0.116298	0.0720721	0.106606	0.752964
Ischemic stroke	SomaScan	6434_18	O75106	AOC2	Wald ratio	1	0.226226	0.139988	0.106087	0.752964
Ischemic stroke	SomaScan	19617_5	Q14914	PTGR1	Inverse variance weighted (fixed effects)	3	0.030212	0.0187676	0.107442	0.752964
Cardioembolic stroke	Olink	OID30620	P0C862	C1QTNF9	Inverse variance weighted (fixed effects)	4	0.0493317	0.0305433	0.10628	0.752964
Cardioembolic stroke	Olink	OID30721	Q9NZP8	C1RL	Wald ratio	1	0.296357	0.18372	0.106724	0.752964
Cardioembolic stroke	Olink	OID30301	P15502	ELN	Wald ratio	1	0.354665	0.220188	0.107237	0.752964
Cardioembolic stroke	SomaScan	19277_4	Q8NFU3	TSTD1	Inverse variance weighted (fixed effects)	2	-0.0820453	0.0508872	0.106897	0.752964
Cardioembolic stroke	SomaScan	8250_2	Q12913	PTPRJ	Wald ratio	1	0.424687	0.26373	0.10733	0.752964
Large artery stroke	Olink	OID20653	P43489	TNFRSF4	Wald ratio	1	0.395468	0.245593	0.107342	0.752964
Large artery stroke	Olink	OID31459	Q16819	MEP1A	Inverse variance weighted (fixed effects)	2	-0.174028	0.10766	0.105996	0.752964
Large artery stroke	Olink	OID21017	P15311	EZR	Wald ratio	1	-0.414639	0.256681	0.106227	0.752964
Large artery stroke	Olink	OID30238	Q5GAN6	RNASE10	Inverse variance weighted (fixed effects)	4	-0.0926741	0.0575408	0.107271	0.752964
Large artery stroke	Olink	OID20512	P30838	ALDH3A1	Inverse variance weighted (fixed effects)	2	0.124745	0.0772656	0.106421	0.752964
Large artery stroke	Olink	OID20311	P46531	NOTCH1	Wald ratio	1	-0.708836	0.439575	0.106843	0.752964
Large artery stroke	SomaScan	5509_7	P01133	EGF	Wald ratio	1	-0.333333	0.206704	0.106829	0.752964
Large artery stroke	SomaScan	19238_12	P15104	GLUL	Wald ratio	1	0.681467	0.42278	0.10699	0.752964
Large artery stroke	SomaScan	3327_27	Q9HB63	NTN4	Inverse variance weighted (fixed effects)	3	-0.163239	0.101299	0.10708	0.752964
Large artery stroke	SomaScan	3420_21	Q8N1Q1	CA13	Inverse variance weighted (fixed effects)	2	0.116602	0.0723968	0.107268	0.752964
Large artery stroke	SomaScan	18831_6	Q96JA1	LRIG1	Inverse variance weighted (fixed effects)	3	0.107146	0.0665398	0.107343	0.752964
Large artery stroke	SomaScan	5107_7	P46531	NOTCH1	Wald ratio	1	-0.451446	0.279959	0.106843	0.752964
Small vessel stroke	Olink	OID21467	P35318	ADM	Wald ratio	1	-0.21107	0.130662	0.106227	0.752964
Small vessel stroke	Olink	OID20433	O95379	TNFAIP8	Wald ratio	1	0.399423	0.247805	0.106996	0.752964
Small vessel stroke	Olink	OID30711	O95497	VNN1	Inverse variance weighted (fixed effects)	3	0.075115	0.0465005	0.106233	0.752964
Small vessel stroke	Olink	OID20235	Q8NBP7	PCSK9	Inverse variance weighted (fixed effects)	2	0.213447	0.13199	0.105845	0.752964
Small vessel stroke	SomaScan	5132_71	Q6UWB1	IL27RA	Inverse variance weighted (fixed effects)	3	-0.0756229	0.046789	0.106039	0.752964
Small vessel stroke	SomaScan	8480_29	Q12805	EFEMP1	Inverse variance weighted (fixed effects)	2	-0.244647	0.151556	0.106476	0.752964
Small vessel stroke	SomaScan	9026_40	Q6UX41	BTNL8	Wald ratio	1	0.241773	0.149765	0.106452	0.752964
Small vessel stroke	SomaScan	4989_7	P02679	FGG	Wald ratio	1	0.232598	0.144312	0.107013	0.752964
Small vessel stroke	SomaScan	17726_3	Q9NR31	SAR1A	Wald ratio	1	0.212809	0.132088	0.107156	0.752964
Small vessel stroke	SomaScan	15615_8	O75022	LILRB3	Inverse variance weighted (fixed effects)	3	-0.0649335	0.0403289	0.107376	0.752964
Small vessel stroke	SomaScan	9212_22	Q9UBX1	CTSF	Wald ratio	1	-0.187839	0.116721	0.10755	0.753293
Ischemic stroke	Olink	OID31011	Q96A00	PPP1R14A	Inverse variance weighted (fixed effects)	2	0.0545119	0.0338791	0.107614	0.753351
Large artery stroke	SomaScan	8697_38	P35052	GPC1	Inverse variance weighted (fixed effects)	3	-0.0947046	0.058879	0.107734	0.753807
Ischemic stroke	Olink	OID20142	Q9UHL4	DPP7	Inverse variance weighted (fixed effects)	2	-0.0488166	0.0303651	0.107911	0.753978
Ischemic stroke	SomaScan	19117_3	Q96A00	PPP1R14A	Wald ratio	1	0.0621635	0.0386686	0.107924	0.753978
Ischemic stroke	SomaScan	15305_7	O76038	SCGN	Wald ratio	1	0.167768	0.104359	0.107924	0.753978
Cardioembolic stroke	SomaScan	16074_12	O75791	GRAP2	Wald ratio	1	0.638254	0.397089	0.107982	0.753998
Large artery stroke	Olink	OID21205	Q05516	ZBTB16	Inverse variance weighted (fixed effects)	3	0.177544	0.110523	0.108188	0.755048
Small vessel stroke	Olink	OID21310	O95498	VNN2	Inverse variance weighted (fixed effects)	3	-0.0566113	0.0352642	0.108417	0.755878
Small vessel stroke	SomaScan	11140_56	P02452	COL1A1	Wald ratio	1	-0.57603	0.358801	0.1084	0.755878
Small vessel stroke	Olink	OID21149	P00918	CA2	Wald ratio	1	-0.33124	0.206411	0.108546	0.756392
Large artery stroke	Olink	OID30970	O14578	CIT	Wald ratio	1	-0.653639	0.407409	0.10863	0.756398
Small vessel stroke	SomaScan	11177_16	P13647	KRT5	Wald ratio	1	-0.242132	0.150931	0.108658	0.756398
Cardioembolic stroke	Olink	OID20071	O95183	VAMP5	Wald ratio	1	-0.341372	0.212898	0.108836	0.757251
Ischemic stroke	Olink	OID20543	P58294	PROK1	Inverse variance weighted (fixed effects)	2	0.0321615	0.0200729	0.109104	0.758546
Ischemic stroke	SomaScan	18280_29	Q96FN9	DTD2	Wald ratio	1	0.109981	0.0686586	0.109188	0.758546
Ischemic stroke	SomaScan	12573_80	O75382	TRIM3	Wald ratio	1	-0.112787	0.0704023	0.109147	0.758546
Cardioembolic stroke	Olink	OID30282	P01189	POMC	Wald ratio	1	0.379262	0.236952	0.109469	0.759725
Large artery stroke	SomaScan	3293_2	O43866	CD5L	Inverse variance weighted (fixed effects)	2	-0.116502	0.072776	0.109416	0.759725
Ischemic stroke	Olink	OID21087	P30086	PEBP1	Wald ratio	1	0.134352	0.0839699	0.109599	0.760236
Ischemic stroke	Olink	OID31516	Q9HC56	PCDH9	Inverse variance weighted (fixed effects)	3	-0.0436781	0.0273098	0.109741	0.760447
Cardioembolic stroke	SomaScan	13397_88	O15263	DEFB4A	Wald ratio	1	-0.284207	0.177712	0.109763	0.760447
Small vessel stroke	SomaScan	2381_52	P01031	C5	Inverse variance weighted (fixed effects)	2	-0.251531	0.157294	0.109796	0.760447
Large artery stroke	Olink	OID31408	Q6UW15	REG3G	Inverse variance weighted (fixed effects)	2	0.12353	0.0772818	0.109947	0.761104
Ischemic stroke	SomaScan	16304_6	Q9BXB1	LGR4	Inverse variance weighted (fixed effects)	2	-0.101237	0.0633635	0.110106	0.76139
Cardioembolic stroke	Olink	OID21417	Q16790	CA9	Inverse variance weighted (fixed effects)	2	0.190563	0.11926	0.110069	0.76139
Cardioembolic stroke	SomaScan	9826_135	P49789	FHIT	Inverse variance weighted (fixed effects)	2	0.27794	0.173999	0.110184	0.76139
Large artery stroke	SomaScan	11649_3	Q8IYB5	SMAP1	Inverse variance weighted (fixed effects)	2	0.119273	0.0746744	0.110211	0.76139
Ischemic stroke	Olink	OID20264	Q9UBP4	DKK3	Inverse variance weighted (fixed effects)	2	0.0304481	0.0191034	0.110967	0.763547
Ischemic stroke	Olink	OID20384	Q15113	PCOLCE	Wald ratio	1	-0.0704521	0.0442509	0.111361	0.763547
Ischemic stroke	Olink	OID20564	P24071	FCAR	Inverse variance weighted (fixed effects)	2	-0.0227312	0.0142542	0.110779	0.763547
Ischemic stroke	Olink	OID20471	Q14435	GALNT3	Inverse variance weighted (fixed effects)	3	-0.034088	0.0213705	0.110692	0.763547
Ischemic stroke	Olink	OID21071	P11215	ITGAM	Wald ratio	1	-0.0739505	0.0464482	0.111361	0.763547
Ischemic stroke	SomaScan	17808_37	Q9NQR4	NIT2	Wald ratio	1	-0.122718	0.0770791	0.111361	0.763547
Cardioembolic stroke	Olink	OID31378	Q13287	NMI	Inverse variance weighted (fixed effects)	2	0.0705754	0.0442382	0.110635	0.763547
Cardioembolic stroke	Olink	OID30229	Q9NZN3	EHD3	Wald ratio	1	-0.158691	0.0995706	0.110992	0.763547
Cardioembolic stroke	Olink	OID20460	O14904	WNT9A	Inverse variance weighted (fixed effects)	2	0.192605	0.120894	0.111121	0.763547
Cardioembolic stroke	SomaScan	13944_3	P0DMM9	SULT1A3	Inverse variance weighted (fixed effects)	2	0.213259	0.133946	0.111356	0.763547
Cardioembolic stroke	SomaScan	5000_52	Q08380	LGALS3BP	Inverse variance weighted (fixed effects)	2	0.172244	0.108153	0.11125	0.763547
Large artery stroke	Olink	OID21483	P29017	CD1C	Wald ratio	1	-0.385921	0.242227	0.111111	0.763547
Large artery stroke	SomaScan	11145_72	Q6ZVL6	KIAA1549L	Inverse variance weighted (fixed effects)	2	-0.11687	0.0733524	0.1111	0.763547
Small vessel stroke	Olink	OID20587	Q6ZUJ8	PIK3AP1	Inverse variance weighted (fixed effects)	2	0.149067	0.0936145	0.111307	0.763547
Small vessel stroke	SomaScan	3773_15	Q02763	TEK	Wald ratio	1	0.225279	0.141448	0.111236	0.763547
Cardioembolic stroke	SomaScan	16916_19	Q9H5Y7	SLITRK6	Inverse variance weighted (fixed effects)	2	-0.139789	0.0878304	0.11148	0.763567
Large artery stroke	Olink	OID31054	P61764	STXBP1	Wald ratio	1	0.627039	0.39398	0.111486	0.763567
Small vessel stroke	Olink	OID20290	P16581	SELE	Wald ratio	1	0.349658	0.219724	0.111532	0.763567
Ischemic stroke	SomaScan	6556_5	Q9UJA9	ENPP5	Inverse variance weighted (fixed effects)	3	-0.033333	0.0209554	0.111685	0.764235
Ischemic stroke	SomaScan	5810_25	P13385	TDGF1	Inverse variance weighted (fixed effects)	2	-0.0279938	0.0176191	0.112097	0.764759
[truncated: 11,667 more rows]

## Sheet: Table S3
Table S3. Association of plasma proteins with any ischemic stroke using the multi-ancestry GIGASTROKE dataset in a two-sample Mendelian randomization framework.
Platform	Assay_ID	Protein	Number of genetic variants	Beta	Standard error	P
Olink	OID20066	GRK5	1	-0.185079	0.0277373	2.51368e-11
Olink	OID21514	FURIN	2	0.19303	0.0353675	4.81964e-08
Olink	OID30159	MMUT	1	NA	NA	NA
Olink	OID30149	PROCR	1	-0.0604395	0.0185507	0.00112175
Olink	OID21241	CEP85	1	-0.129699	0.0587059	0.0271536
Olink	OID30773	F11	2	0.097489	0.0167825	6.28589e-09
Olink	OID21439	MMP12	3	-0.065672	0.0127411	2.54509e-07
SomaScan	4496_60	MMP12	3	-0.0707843	0.0140994	5.15672e-07
SomaScan	19558_10	LRP4	3	0.0579689	0.0158839	0.000262718
SomaScan	2190_55	F11	3	0.117505	0.0202529	6.55769e-09
SomaScan	17490_4	SH3BGRL3	2	-0.0534734	0.0184313	0.00371713
SomaScan	15343_337	KNG1	3	0.0827191	0.0157399	1.47721e-07

## Sheet: Table S4
Table S4. Results of the bi-directional Mendelian randomization analysis.
Assay ID	Protein	Exposure	Method	Number of genetic variants	Beta	Standard error	P	FDR
7933_75	'ADAM22	Large artery stroke	Inverse variance weighted (multiplicative random effects)	2	-0.105577	0.0020247	0	0
9021_1	'HAVCR1	Large artery stroke	Inverse variance weighted (multiplicative random effects)	2	0.0297435	0.000241833	0	0
9713_67	'PDGFRL	Large artery stroke	Inverse variance weighted (multiplicative random effects)	2	-0.105775	4.37361e-05	0	0
3858_5	'ACP1	Large artery stroke	Inverse variance weighted (multiplicative random effects)	2	-0.0372166	0.000404102	0	0
16753_46	'COL6A2	Large artery stroke	Inverse variance weighted (multiplicative random effects)	2	0.0351136	0.000177952	0	0
8252_2	'NOTUM	Large artery stroke	Inverse variance weighted (multiplicative random effects)	2	-0.0483891	0.000666588	0	0
4706_17	'EPB41	Large artery stroke	Inverse variance weighted (multiplicative random effects)	2	-0.0942381	0.0016855	0	0
3805_16	'ESM1	Large artery stroke	Inverse variance weighted (multiplicative random effects)	2	-0.052087	0.00028356	0	0
15635_4	'SMOC2	Large artery stroke	Inverse variance weighted (multiplicative random effects)	2	0.0171925	0.000183757	0	0
5740_17	'ROBO1	Large artery stroke	Inverse variance weighted (multiplicative random effects)	2	0.0266263	0.000125331	0	0
5605_77	'MFNG	Large artery stroke	Inverse variance weighted (multiplicative random effects)	2	-0.0655115	0.00133325	0	0
8989_40	'SCUBE1	Large artery stroke	Inverse variance weighted (multiplicative random effects)	2	-0.0610901	0.00109515	0	0
18930_28	'SLIT2	Large artery stroke	Inverse variance weighted (multiplicative random effects)	2	0.0125493	5.75573e-05	0	0
5451_1	'ALCAM	Large artery stroke	Inverse variance weighted (multiplicative random effects)	2	-0.0217578	0.000542651	0	0
4721_54	'TFF3	Large artery stroke	Inverse variance weighted (multiplicative random effects)	2	-0.017554	8.97421e-05	0	0
19338_3	'LZIC	Large artery stroke	Inverse variance weighted (multiplicative random effects)	2	-0.0766835	0.0015959	0	0
8233_2	'ITIH5	Large artery stroke	Inverse variance weighted (multiplicative random effects)	2	-0.0663816	0.00017752	0	0
11134_30	'MTRF1L	Large artery stroke	Inverse variance weighted (multiplicative random effects)	2	-0.0739976	0.000878217	0	0
4984_83	'ESD	Large artery stroke	Inverse variance weighted (multiplicative random effects)	2	-0.0510003	0.00053646	0	0
3461_58	'BCAN	Large artery stroke	Inverse variance weighted (multiplicative random effects)	2	-0.0623988	0.00169911	2.99159e-295	1.55578e-292
9719_145	'MMP16	Large artery stroke	Inverse variance weighted (multiplicative random effects)	2	-0.0156787	0.00042812	1.27277e-293	6.30384e-291
7059_14	'LILRA6	Large artery stroke	Inverse variance weighted (multiplicative random effects)	2	-0.0377231	0.00123988	2.5775e-203	1.21857e-200
18307_71	'PPA2	Large artery stroke	Inverse variance weighted (multiplicative random effects)	2	-0.0704605	0.00232686	2.01618e-201	9.1175e-199
7655_11	'NPPB	Large artery stroke	Inverse variance weighted (multiplicative random effects)	2	-0.0604296	0.00203839	3.8523e-193	1.66949e-190
OID30412	'TNN	Large artery stroke	Inverse variance weighted (multiplicative random effects)	3	0.0355117	0.00122586	1.63252e-184	6.79193e-182
9545_156	'GZMK	Large artery stroke	Inverse variance weighted (multiplicative random effects)	2	-0.031566	0.00112162	2.8954e-174	1.15827e-171
3196_6	'HAPLN1	Large artery stroke	Inverse variance weighted (multiplicative random effects)	2	0.0221381	0.000810788	3.76071e-164	1.44871e-161
2617_56	'ERBB3	Large artery stroke	Inverse variance weighted (multiplicative random effects)	2	-0.052518	0.00197132	2.27228e-156	8.44069e-154
OID21038	'CHGB	Large artery stroke	Inverse variance weighted (multiplicative random effects)	3	-0.104366	0.00406811	3.75031e-145	1.34507e-142
6909_40	'MGAT2	Large artery stroke	Inverse variance weighted (multiplicative random effects)	2	0.0292302	0.00118882	1.71229e-133	5.93649e-131
9754_33	'NQO2	Large artery stroke	Inverse variance weighted (multiplicative random effects)	2	-0.0616027	0.00252561	2.119e-131	7.10958e-129
18185_118	'ALDOB	Large artery stroke	Inverse variance weighted (multiplicative random effects)	2	0.0187881	0.000793135	4.74424e-124	1.54203e-121
19615_213	'NT5C3A	Large artery stroke	Inverse variance weighted (multiplicative random effects)	2	-0.0863349	0.0038805	1.16855e-109	3.68306e-107
11219_95	'FGFBP3	Large artery stroke	Inverse variance weighted (multiplicative random effects)	2	-0.10498	0.00478901	1.63649e-106	5.00621e-104
14048_7	'IL1RAP	Large artery stroke	Inverse variance weighted (multiplicative random effects)	2	-0.0412826	0.00197172	2.44581e-97	7.26825e-95
OID20261	'FUCA1	Large artery stroke	Inverse variance weighted (multiplicative random effects)	3	-0.0206607	0.000997931	3.21609e-95	9.29181e-93
16763_11	'LECT2	Large artery stroke	Inverse variance weighted (multiplicative random effects)	2	0.0129819	0.000634722	5.66315e-93	1.59196e-90
3617_80	'HGFAC	Large artery stroke	Inverse variance weighted (multiplicative random effects)	2	-0.073837	0.00370038	1.38681e-88	3.79583e-86
5124_69	'ICAM5	Large artery stroke	Inverse variance weighted (multiplicative random effects)	2	-0.0729289	0.00396787	1.90408e-75	5.07802e-73
5487_7	'SLAMF7	Large artery stroke	Inverse variance weighted (multiplicative random effects)	2	0.0272773	0.00152342	1.07036e-71	2.7832e-69
18382_109	'COMT	Large artery stroke	Inverse variance weighted (multiplicative random effects)	2	-0.0463645	0.00267685	3.29179e-67	8.35072e-65
14123_34	'C10orf54	Large artery stroke	Inverse variance weighted (multiplicative random effects)	2	-0.0510648	0.00314363	2.46789e-59	6.11157e-57
6359_50	'POMGNT2	Large artery stroke	Inverse variance weighted (multiplicative random effects)	2	-0.0677492	0.00438903	9.36915e-54	2.26625e-51
4911_49	'GSTP1	Large artery stroke	Inverse variance weighted (multiplicative random effects)	2	-0.0276477	0.0017944	1.45119e-53	3.43041e-51
7981_230	'B3GALT6	Large artery stroke	Inverse variance weighted (multiplicative random effects)	2	-0.0823258	0.00540963	2.67069e-52	6.17285e-50
OID21290	'LPCAT2	Large artery stroke	Inverse variance weighted (multiplicative random effects)	3	-0.0763861	0.00503419	5.30047e-52	1.19848e-49
9863_1	'TPM4	Large artery stroke	Inverse variance weighted (multiplicative random effects)	2	-0.0362652	0.0024135	4.96377e-51	1.09847e-48
5085_18	'IL20RA	Large artery stroke	Inverse variance weighted (multiplicative random effects)	2	-0.0211104	0.00140803	8.16872e-51	1.77006e-48
13992_12	'NSF	Large artery stroke	Inverse variance weighted (multiplicative random effects)	2	-0.0767698	0.00526971	4.47927e-48	9.50794e-46
5103_30	'CD200R1	Large artery stroke	Inverse variance weighted (multiplicative random effects)	2	-0.0401968	0.002792	5.39526e-47	1.12232e-44
5649_83	'PSG4	Large artery stroke	Inverse variance weighted (multiplicative random effects)	2	-0.0583221	0.00407801	2.13819e-46	4.36066e-44
OID21191	'LTBP3	Large artery stroke	Inverse variance weighted (multiplicative random effects)	3	0.0564728	0.00395403	2.8202e-46	5.64094e-44
7948_129	'GLTPD2	Large artery stroke	Inverse variance weighted (multiplicative random effects)	2	-0.0140221	0.00102874	2.64236e-42	5.18551e-40
19117_3	'PPP1R14A	Large artery stroke	Inverse variance weighted (multiplicative random effects)	2	0.0193622	0.00145735	2.79325e-40	5.3801e-38
6998_106	'ASPH	Large artery stroke	Inverse variance weighted (multiplicative random effects)	2	-0.046426	0.00352481	1.28546e-39	2.43093e-37
6255_74	'CPXM1	Large artery stroke	Inverse variance weighted (multiplicative random effects)	2	-0.0381751	0.00292154	5.09673e-39	9.46627e-37
9482_110	'NUDT9	Large artery stroke	Inverse variance weighted (multiplicative random effects)	2	-0.0295513	0.00230417	1.1855e-37	2.16322e-35
3727_35	'PYY	Large artery stroke	Inverse variance weighted (multiplicative random effects)	2	0.0718986	0.00568789	1.26004e-36	2.25959e-34
12343_14	'ACAP2	Large artery stroke	Inverse variance weighted (multiplicative random effects)	2	-0.010879	0.000860911	1.32601e-36	2.3376e-34
7266_4	'SERPINA9	Large artery stroke	Inverse variance weighted (multiplicative random effects)	2	-0.0423979	0.00336891	2.552e-36	4.4239e-34
OID31098	'HSD17B14	Large artery stroke	Inverse variance weighted (multiplicative random effects)	3	-0.0527959	0.00423158	1.00121e-35	1.70714e-33
15566_10	'CNN1	Large artery stroke	Inverse variance weighted (multiplicative random effects)	2	-0.0438646	0.00362691	1.1331e-33	1.90087e-31
3151_6	'IL2RA	Large artery stroke	Inverse variance weighted (multiplicative random effects)	2	-0.0952514	0.00796541	5.88724e-33	9.71956e-31
5227_60	'PDK1	Large artery stroke	Inverse variance weighted (multiplicative random effects)	2	-0.0552338	0.00462094	6.26679e-33	1.01845e-30
9906_21	'SPOCK3	Large artery stroke	Inverse variance weighted (multiplicative random effects)	2	-0.0433067	0.00363634	1.0569e-32	1.6912e-30
OID30650	'SUSD5	Large artery stroke	Inverse variance weighted (multiplicative random effects)	3	0.03246	0.0027501	3.75687e-32	5.92048e-30
14618_26	'VOPP1	Large artery stroke	Inverse variance weighted (multiplicative random effects)	2	-0.0902214	0.00774573	2.35204e-31	3.65128e-29
7955_195	'ITIH1	Large artery stroke	Inverse variance weighted (multiplicative random effects)	2	-0.0773865	0.00667764	4.69135e-31	7.1757e-29
19367_34	'DCI	Large artery stroke	Inverse variance weighted (multiplicative random effects)	2	-0.0218727	0.0019435	2.20525e-29	3.32417e-27
6550_4	'ICAM4	Large artery stroke	Inverse variance weighted (multiplicative random effects)	2	0.03172	0.00284762	8.09189e-29	1.20234e-26
3835_11	'TLR2	Large artery stroke	Inverse variance weighted (multiplicative random effects)	2	-0.0177135	0.0016166	6.13418e-28	8.98614e-26
18831_6	'LRIG1	Large artery stroke	Inverse variance weighted (multiplicative random effects)	2	-0.043063	0.00393267	6.64107e-28	9.59358e-26
9765_4	'NDE1	Large artery stroke	Inverse variance weighted (multiplicative random effects)	2	-0.0775511	0.00723427	8.20333e-27	1.16881e-24
19279_42	'RBP1	Large artery stroke	Inverse variance weighted (multiplicative random effects)	2	0.0379359	0.00357665	2.77834e-26	3.90506e-24
OID30509	'NAGA	Large artery stroke	Inverse variance weighted (multiplicative random effects)	3	-0.0428688	0.00429961	2.05406e-23	2.84856e-21
5632_6	'CRTAC1	Large artery stroke	Inverse variance weighted (multiplicative random effects)	2	-0.048706	0.00501006	2.43833e-22	3.33699e-20
OID31411	'TMEM106A	Large artery stroke	Inverse variance weighted (multiplicative random effects)	3	-0.065664	0.00681682	5.82168e-22	7.86381e-20
12381_26	'CBR1	Large artery stroke	Inverse variance weighted (multiplicative random effects)	2	-0.0438423	0.00459408	1.38473e-21	1.84648e-19
4763_31	'AFM	Large artery stroke	Inverse variance weighted (multiplicative random effects)	2	-0.0685594	0.00724155	2.86625e-21	3.77365e-19
OID20501	'FABP9	Large artery stroke	Inverse variance weighted (multiplicative random effects)	3	0.0493772	0.00522381	3.31309e-21	4.30743e-19
15462_28	'CD8A	Large artery stroke	Inverse variance weighted (multiplicative random effects)	2	0.0962148	0.010402	2.25158e-20	2.8912e-18
6920_1	'GFRAL	Large artery stroke	Inverse variance weighted (multiplicative random effects)	2	-0.0556991	0.00603788	2.83674e-20	3.59816e-18
4152_58	'KLKB1	Large artery stroke	Inverse variance weighted (multiplicative random effects)	2	-0.0719216	0.00790548	9.22778e-20	1.15636e-17
16609_106	'KIRREL2	Large artery stroke	Inverse variance weighted (multiplicative random effects)	2	-0.126933	0.014107	2.30003e-19	2.84793e-17
15499_11	'ATRN	Large artery stroke	Inverse variance weighted (multiplicative random effects)	2	-0.0204348	0.00228132	3.32271e-19	4.06583e-17
13384_110	'FH	Large artery stroke	Inverse variance weighted (multiplicative random effects)	2	-0.0954049	0.0107101	5.19919e-19	6.28799e-17
17832_12	'IDI2	Large artery stroke	Inverse variance weighted (multiplicative random effects)	2	-0.0786055	0.00889381	9.72551e-19	1.1627e-16
18422_41	'MVD	Large artery stroke	Inverse variance weighted (multiplicative random effects)	2	-0.0141268	0.00160262	1.19902e-18	1.41716e-16
8841_65	'CILP2	Large artery stroke	Inverse variance weighted (multiplicative random effects)	2	-0.0518224	0.00594525	2.86694e-18	3.35045e-16
4548_4	'FUT3	Large artery stroke	Inverse variance weighted (multiplicative random effects)	2	-0.022446	0.00259864	5.74088e-18	6.63454e-16
5749_53	'CLPS	Large artery stroke	Inverse variance weighted (multiplicative random effects)	2	-0.0280566	0.0033048	2.07283e-17	2.36918e-15
15653_9	'COL10A1	Large artery stroke	Inverse variance weighted (multiplicative random effects)	2	-0.0592738	0.00698938	2.2411e-17	2.53367e-15
OID31020	'LRTM2	Large artery stroke	Inverse variance weighted (multiplicative random effects)	3	-0.0934162	0.0110776	3.37231e-17	3.77155e-15
OID30491	'ADAM12	Large artery stroke	Inverse variance weighted (multiplicative random effects)	3	0.0581471	0.00704555	1.54435e-16	1.70881e-14
4874_3	'ANG	Large artery stroke	Inverse variance weighted (multiplicative random effects)	2	0.0343694	0.00416584	1.5801e-16	1.72996e-14
6572_10	'LRRTM4	Large artery stroke	Inverse variance weighted (multiplicative random effects)	2	-0.0600919	0.00729985	1.84208e-16	1.99578e-14
OID20075	'CA5A	Large artery stroke	Inverse variance weighted (multiplicative random effects)	3	0.0434341	0.00529282	2.28263e-16	2.44759e-14
19254_125	'GMPR	Large artery stroke	Inverse variance weighted (multiplicative random effects)	2	-0.0624885	0.0076364	2.76914e-16	2.93896e-14
OID21011	'PVR	Large artery stroke	Inverse variance weighted (multiplicative random effects)	3	-0.0402144	0.00499089	7.78251e-16	8.17635e-14
2771_35	'IGFBP1	Large artery stroke	Inverse variance weighted (multiplicative random effects)	2	0.0175939	0.00218581	8.33728e-16	8.67161e-14
19383_131	'CINP	Large artery stroke	Inverse variance weighted (multiplicative random effects)	2	-0.0878256	0.010925	9.05885e-16	9.32882e-14
10442_1	'TMEM190	Large artery stroke	Inverse variance weighted (multiplicative random effects)	2	-0.0427697	0.00541808	2.92928e-15	2.987e-13
11103_24	'HSPB1	Large artery stroke	Inverse variance weighted (multiplicative random effects)	2	-0.0497457	0.00631467	3.33194e-15	3.36461e-13
19496_1	'NPL	Large artery stroke	Inverse variance weighted (multiplicative random effects)	2	-0.0586233	0.00746366	4.01378e-15	4.01417e-13
OID30515	'C1QL2	Large artery stroke	Inverse variance weighted (multiplicative random effects)	3	0.0853547	0.0109151	5.2874e-15	5.23754e-13
8039_41	'FAM177A1	Large artery stroke	Inverse variance weighted (multiplicative random effects)	2	-0.0364809	0.00466828	5.51269e-15	5.4092e-13
3280_49	'ACAN	Large artery stroke	Inverse variance weighted (multiplicative random effects)	2	-0.126911	0.0163779	9.26693e-15	9.00798e-13
7228_2	'ST6GALNAC6	Large artery stroke	Inverse variance weighted (multiplicative random effects)	2	-0.040949	0.00534789	1.90279e-14	1.83249e-12
12682_5	'CCBL2	Large artery stroke	Inverse variance weighted (multiplicative random effects)	2	-0.0637854	0.00851173	6.68961e-14	6.38336e-12
6388_21	'CCDC126	Large artery stroke	Inverse variance weighted (multiplicative random effects)	2	-0.0614395	0.00821417	7.44954e-14	7.04388e-12
15617_8	'XCL2	Large artery stroke	Inverse variance weighted (multiplicative random effects)	2	-0.0398252	0.00532715	7.66783e-14	7.18497e-12
OID21413	'AMBP	Large artery stroke	Inverse variance weighted (multiplicative random effects)	3	0.0385449	0.00516856	8.81391e-14	8.18513e-12
6382_17	'MANBA	Large artery stroke	Inverse variance weighted (multiplicative random effects)	2	-0.0945101	0.0127031	1.00757e-13	9.27411e-12
6965_19	'CNTNAP2	Large artery stroke	Inverse variance weighted (multiplicative random effects)	2	-0.0772501	0.0104127	1.18169e-13	1.07813e-11
19561_216	'PLXND1	Large artery stroke	Inverse variance weighted (multiplicative random effects)	2	-0.0366427	0.00494694	1.29045e-13	1.16713e-11
12486_8	'GLRX2	Large artery stroke	Inverse variance weighted (multiplicative random effects)	2	-0.0453964	0.00613076	1.31455e-13	1.17868e-11
7916_10	'S100A7	Large artery stroke	Inverse variance weighted (multiplicative random effects)	2	-0.0433367	0.00589212	1.90883e-13	1.69691e-11
2750_3	'APOA1	Large artery stroke	Inverse variance weighted (multiplicative random effects)	2	-0.0531932	0.00735477	4.74264e-13	4.18036e-11
8376_25	'LHB	Large artery stroke	Inverse variance weighted (multiplicative random effects)	2	-0.0552772	0.00772826	8.5145e-13	7.44196e-11
OID20260	'ADGRE5	Large artery stroke	Inverse variance weighted (multiplicative random effects)	3	-0.0499186	0.00698337	8.79103e-13	7.61963e-11
OID30997	'PPP1R14D	Large artery stroke	Inverse variance weighted (multiplicative random effects)	3	-0.04701	0.00663393	1.37749e-12	1.18407e-10
9901_28	'EGLN1	Large artery stroke	Inverse variance weighted (multiplicative random effects)	2	-0.0197881	0.00281592	2.10697e-12	1.79628e-10
15513_108	'PRSS8	Large artery stroke	Inverse variance weighted (multiplicative random effects)	2	0.0683041	0.00973975	2.33391e-12	1.97358e-10
10462_14	'INSL5	Large artery stroke	Inverse variance weighted (multiplicative random effects)	2	-0.0293149	0.00419473	2.77839e-12	2.33049e-10
15440_57	'PCSK2	Large artery stroke	Inverse variance weighted (multiplicative random effects)	2	-0.0509658	0.00731986	3.33887e-12	2.7782e-10
15641_20	'TMEFF1	Large artery stroke	Inverse variance weighted (multiplicative random effects)	2	-0.028199	0.00405142	3.39588e-12	2.80322e-10
5076_53	'EPHA10	Large artery stroke	Inverse variance weighted (multiplicative random effects)	2	-0.086158	0.0123853	3.48905e-12	2.85745e-10
12366_16	'CRYGD	Large artery stroke	Inverse variance weighted (multiplicative random effects)	2	-0.0848672	0.0122283	3.91517e-12	3.18138e-10
3581_53	'AHSG	Large artery stroke	Inverse variance weighted (multiplicative random effects)	2	-0.0753713	0.010955	5.98281e-12	4.82381e-10
OID30811	'SNAP25	Large artery stroke	Inverse variance weighted (multiplicative random effects)	3	-0.0415758	0.00604468	6.06649e-12	4.85366e-10
OID30672	'RNASE1	Large artery stroke	Inverse variance weighted (multiplicative random effects)	3	-0.0459608	0.00669838	6.81509e-12	5.41097e-10
8024_64	'TPST2	Large artery stroke	Inverse variance weighted (multiplicative random effects)	2	0.0210873	0.00311417	1.27543e-11	1.00498e-09
16057_6	'IGF2R	Large artery stroke	Inverse variance weighted (multiplicative random effects)	2	-0.072314	0.0107356	1.62928e-11	1.27415e-09
OID20108	'PAG1	Large artery stroke	Inverse variance weighted (multiplicative random effects)	3	0.0980849	0.0146756	2.33249e-11	1.81047e-09
OID20766	'PRELP	Large artery stroke	Inverse variance weighted (multiplicative random effects)	3	-0.0997858	0.0150433	3.28444e-11	2.53048e-09
2972_57	'BMP7	Large artery stroke	Inverse variance weighted (multiplicative random effects)	2	-0.0339864	0.00515922	4.47285e-11	3.42074e-09
13124_20	'ISLR2	Large artery stroke	Inverse variance weighted (multiplicative random effects)	2	-0.066329	0.0100808	4.71217e-11	3.57747e-09
19372_7	'MDGA2	Large artery stroke	Inverse variance weighted (multiplicative random effects)	2	-0.096959	0.0147965	5.64472e-11	4.2544e-09
OID21419	'CLMP	Large artery stroke	Inverse variance weighted (multiplicative random effects)	3	0.0425725	0.00663996	1.4404e-10	1.07781e-08
6507_16	'NCAM2	Large artery stroke	Inverse variance weighted (multiplicative random effects)	2	-0.0577658	0.00949992	1.19692e-09	8.89226e-08
15486_126	'AOC1	Large artery stroke	Inverse variance weighted (multiplicative random effects)	2	-0.0944022	0.0157086	1.85982e-09	1.36624e-07
OID20125	'NPPB	Large artery stroke	Inverse variance weighted (multiplicative random effects)	3	0.0291985	0.00485903	1.86526e-09	1.36624e-07
6923_1	'PLOD2	Large artery stroke	Inverse variance weighted (multiplicative random effects)	2	0.0182559	0.00305528	2.2983e-09	1.67165e-07
11192_168	'TINAGL1	Large artery stroke	Inverse variance weighted (multiplicative random effects)	2	-0.0373739	0.0063214	3.37375e-09	2.43683e-07
18340_2	'PSMB4	Large artery stroke	Inverse variance weighted (multiplicative random effects)	2	-0.0700768	0.0119477	4.48325e-09	3.21588e-07
3457_57	'POSTN	Large artery stroke	Inverse variance weighted (multiplicative random effects)	2	-0.0357577	0.00610698	4.76366e-09	3.39362e-07
OID21468	'IDUA	Large artery stroke	Inverse variance weighted (multiplicative random effects)	3	-0.0360637	0.00620403	6.13869e-09	4.34343e-07
17737_7	'IVD	Large artery stroke	Inverse variance weighted (multiplicative random effects)	2	-0.0553372	0.00953994	6.60837e-09	4.64416e-07
18321_38	'MTHFD2	Large artery stroke	Inverse variance weighted (multiplicative random effects)	2	-0.070928	0.0122318	6.68409e-09	4.66585e-07
7208_60	'MGAT4C	Large artery stroke	Inverse variance weighted (multiplicative random effects)	2	-0.0819708	0.0141921	7.6588e-09	5.31061e-07
6451_64	'ASPN	Large artery stroke	Inverse variance weighted (multiplicative random effects)	2	-0.0445459	0.00773969	8.63815e-09	5.95003e-07
9005_16	'PLXNA1	Large artery stroke	Inverse variance weighted (multiplicative random effects)	2	-0.067403	0.0117402	9.40018e-09	6.43232e-07
5586_66	'MINPP1	Large artery stroke	Inverse variance weighted (multiplicative random effects)	2	-0.0431494	0.00760659	1.40616e-08	9.55911e-07
8065_245	'PATE4	Large artery stroke	Inverse variance weighted (multiplicative random effects)	2	-0.0340693	0.00601345	1.46576e-08	9.8996e-07
10042_8	'SGK3	Large artery stroke	Inverse variance weighted (multiplicative random effects)	2	-0.0300397	0.00540973	2.8096e-08	1.88533e-06
OID20810	'ANXA5	Large artery stroke	Inverse variance weighted (multiplicative random effects)	3	0.0360459	0.00651214	3.1091e-08	2.07294e-06
16908_5	'OMG	Large artery stroke	Inverse variance weighted (multiplicative random effects)	2	-0.0421952	0.00766847	3.74607e-08	2.48171e-06
18241_18	'CPOX	Large artery stroke	Inverse variance weighted (multiplicative random effects)	2	-0.052712	0.00963314	4.4513e-08	2.92398e-06
3431_54	'EPHA1	Large artery stroke	Inverse variance weighted (multiplicative random effects)	2	-0.0167126	0.00305465	4.46989e-08	2.92398e-06
5636_10	'MFAP4	Large artery stroke	Inverse variance weighted (multiplicative random effects)	2	-0.0574516	0.0106174	6.26467e-08	4.07243e-06
7808_5	'GLCE	Large artery stroke	Inverse variance weighted (multiplicative random effects)	2	0.0448761	0.00839364	8.96987e-08	5.79476e-06
15636_49	'SORCS1	Large artery stroke	Inverse variance weighted (multiplicative random effects)	2	-0.0488138	0.00914956	9.54909e-08	6.13087e-06
18319_7	'PDHX	Large artery stroke	Inverse variance weighted (multiplicative random effects)	2	-0.0422891	0.00792881	9.62841e-08	6.14387e-06
6444_15	'PSG3	Large artery stroke	Inverse variance weighted (multiplicative random effects)	2	-0.0224113	0.00420455	9.80693e-08	6.21963e-06
3320_49	'IGFBP7	Large artery stroke	Inverse variance weighted (multiplicative random effects)	2	-0.0158835	0.00298405	1.02182e-07	6.41742e-06
7779_86	'CHST11	Large artery stroke	Inverse variance weighted (multiplicative random effects)	2	-0.0921346	0.0173108	1.02422e-07	6.41742e-06
OID30471	'ADAMTS4	Large artery stroke	Inverse variance weighted (multiplicative random effects)	3	-0.00702436	0.00133127	1.31728e-07	8.20419e-06
12347_29	'CCM2	Large artery stroke	Inverse variance weighted (multiplicative random effects)	2	-0.0417478	0.00793367	1.42409e-07	8.81667e-06
13682_47	'CSF1R	Large artery stroke	Inverse variance weighted (multiplicative random effects)	2	-0.0570544	0.0108806	1.57412e-07	9.63988e-06
OID20412	'CCL5	Large artery stroke	Inverse variance weighted (multiplicative random effects)	3	-0.0393373	0.0075021	1.5756e-07	9.63988e-06
OID20067	'VSTM2L	Large artery stroke	Inverse variance weighted (multiplicative random effects)	3	-0.0298222	0.00573657	2.00777e-07	1.22122e-05
OID20354	'NCAM1	Large artery stroke	Inverse variance weighted (multiplicative random effects)	3	-0.0441029	0.00850148	2.12936e-07	1.28764e-05
4991_12	'GPC5	Large artery stroke	Inverse variance weighted (multiplicative random effects)	2	-0.0545599	0.0105415	2.27016e-07	1.36485e-05
14006_36	'GNMT	Large artery stroke	Inverse variance weighted (multiplicative random effects)	2	-0.0285987	0.0055738	2.88333e-07	1.72353e-05
4978_54	'DBNL	Large artery stroke	Inverse variance weighted (multiplicative random effects)	2	-0.0486764	0.00953057	3.26633e-07	1.94132e-05
19136_22	'ALDH6A1	Large artery stroke	Inverse variance weighted (multiplicative random effects)	2	-0.0733027	0.0144179	3.69261e-07	2.18221e-05
OID20292	'COL6A3	Cardioembolic stroke	Inverse variance weighted (multiplicative random effects)	8	0.0490418	0.00980619	5.70035e-07	3.34968e-05
OID20098	'THPO	Large artery stroke	Inverse variance weighted (multiplicative random effects)	3	-0.0448542	0.00897781	5.84938e-07	3.41794e-05
7822_11	'HRASLS2	Large artery stroke	Inverse variance weighted (multiplicative random effects)	2	-0.0355147	0.0071835	7.65619e-07	4.44872e-05
10499_1	'TMEM106A	Large artery stroke	Inverse variance weighted (multiplicative random effects)	2	-0.0701198	0.0141996	7.88584e-07	4.5567e-05
OID20755	'ADGRE2	Large artery stroke	Inverse variance weighted (multiplicative random effects)	3	-0.073221	0.0149839	1.02574e-06	5.89432e-05
OID20088	'PON2	Large artery stroke	Inverse variance weighted (multiplicative random effects)	3	0.0194125	0.00399413	1.17228e-06	6.6994e-05
12620_3	'SEP11	Large artery stroke	Inverse variance weighted (multiplicative random effects)	2	-0.0538862	0.0111026	1.2132e-06	6.88302e-05
6086_15	'CHRDL2	Large artery stroke	Inverse variance weighted (multiplicative random effects)	2	0.0409113	0.00843055	1.21765e-06	6.88302e-05
OID31370	'INSL4	Cardioembolic stroke	Inverse variance weighted (multiplicative random effects)	8	0.055783	0.0116232	1.59237e-06	8.95258e-05
6060_2	'PIP	Large artery stroke	Inverse variance weighted (multiplicative random effects)	2	-0.149425	0.0314421	2.01019e-06	0.000112408
5631_83	'MLN	Large artery stroke	Inverse variance weighted (multiplicative random effects)	2	0.0271156	0.00582736	3.26894e-06	0.00018182
OID21138	'ARSA	Large artery stroke	Inverse variance weighted (multiplicative random effects)	3	-0.0348256	0.00752655	3.70957e-06	0.00020523
OID20770	'FST	Large artery stroke	Inverse variance weighted (multiplicative random effects)	3	-0.0371262	0.00804226	3.90477e-06	0.000214886
2992_59	'IL17RA	Large artery stroke	Inverse variance weighted (multiplicative random effects)	2	-0.00749174	0.00162377	3.95383e-06	0.000216441
3518_54	'CPB2	Large artery stroke	Inverse variance weighted (multiplicative random effects)	2	-0.0442163	0.00968335	4.96591e-06	0.000270421
OID20191	'NPTXR	Large artery stroke	Inverse variance weighted (multiplicative random effects)	3	-0.0792774	0.0173788	5.07336e-06	0.000274833
19251_56	'SRGN	Large artery stroke	Inverse variance weighted (multiplicative random effects)	2	0.0307122	0.00678511	5.99932e-06	0.00032331
OID31413	'CCDC134	Large artery stroke	Inverse variance weighted (multiplicative random effects)	3	-0.0301345	0.00667749	6.39629e-06	0.000342927
OID20864	'C2CD2L	Large artery stroke	Inverse variance weighted (multiplicative random effects)	3	-0.0565105	0.0126317	7.68731e-06	0.000410029
6455_52	'HAPLN4	Large artery stroke	Inverse variance weighted (multiplicative random effects)	2	-0.0142911	0.00319892	7.91515e-06	0.000420028
OID21269	'ACAA1	Large artery stroke	Inverse variance weighted (multiplicative random effects)	3	0.0909478	0.0204473	8.67111e-06	0.000457808
OID31100	'CALCB	Ischemic stroke	Inverse variance weighted (multiplicative random effects)	23	0.116802	0.0262918	8.89137e-06	0.000467066
16872_248	'GSTZ1	Large artery stroke	Inverse variance weighted (multiplicative random effects)	2	-0.0830586	0.0187103	9.02971e-06	0.00047195
OID31209	'PDIA5	Large artery stroke	Inverse variance weighted (multiplicative random effects)	3	-0.0179292	0.00405378	9.74176e-06	0.00050662
13578_98	'ABLIM3	Large artery stroke	Inverse variance weighted (multiplicative random effects)	2	-0.0768146	0.0173877	9.97348e-06	0.00051609
13114_50	'LUM	Large artery stroke	Inverse variance weighted (multiplicative random effects)	2	-0.0514171	0.011647	1.01188e-05	0.000521016
OID30721	'C1RL	Large artery stroke	Inverse variance weighted (multiplicative random effects)	3	0.0470054	0.0106919	1.10082e-05	0.000564023
5015_15	'PLA2G7	Large artery stroke	Inverse variance weighted (multiplicative random effects)	2	-0.0752474	0.0171802	1.18732e-05	0.000605361
OID31008	'GNAS	Large artery stroke	Inverse variance weighted (multiplicative random effects)	3	0.0221807	0.00509655	1.34837e-05	0.000684116
OID20738	'COLEC12	Cardioembolic stroke	Inverse variance weighted (multiplicative random effects)	8	0.0492849	0.0113358	1.37569e-05	0.000694588
5089_11	'IL7R	Large artery stroke	Inverse variance weighted (multiplicative random effects)	2	0.020862	0.00480043	1.38729e-05	0.000697061
OID20258	'REG3A	Large artery stroke	Inverse variance weighted (multiplicative random effects)	3	0.0478064	0.0110412	1.49242e-05	0.00074628
17447_52	'SFRP4	Large artery stroke	Inverse variance weighted (multiplicative random effects)	2	-0.0454907	0.0105779	1.70385e-05	0.00084641
7926_13	'SPINT3	Large artery stroke	Inverse variance weighted (multiplicative random effects)	2	-0.115873	0.0269479	1.70893e-05	0.00084641
3367_8	'FETUB	Large artery stroke	Inverse variance weighted (multiplicative random effects)	2	-0.0759959	0.0177198	1.79683e-05	0.000885726
2737_22	'NOV	Large artery stroke	Inverse variance weighted (multiplicative random effects)	2	-0.0237077	0.0055679	2.06328e-05	0.00101227
14158_17	'ANXA5	Large artery stroke	Inverse variance weighted (multiplicative random effects)	2	-0.119478	0.0281348	2.16994e-05	0.0010596
OID30569	'AFAP1	Large artery stroke	Inverse variance weighted (multiplicative random effects)	3	-0.0432873	0.0102021	2.20576e-05	0.00107206
12459_13	'PLEKHA1	Large artery stroke	Inverse variance weighted (multiplicative random effects)	2	-0.0516464	0.0121854	2.25133e-05	0.00108912
16913_8	'RNASET2	Large artery stroke	Inverse variance weighted (multiplicative random effects)	2	0.0297199	0.00702842	2.35215e-05	0.00113263
OID31091	'GFRAL	Large artery stroke	Inverse variance weighted (multiplicative random effects)	3	0.0996753	0.0236875	2.57719e-05	0.00123527
3340_53	'THBS4	Large artery stroke	Inverse variance weighted (multiplicative random effects)	2	-0.0457756	0.010886	2.61069e-05	0.00124559
2993_1	'IL18RAP	Large artery stroke	Inverse variance weighted (multiplicative random effects)	2	-0.0394921	0.00941199	2.71742e-05	0.00129059
OID21349	'DTX3	Large artery stroke	Inverse variance weighted (multiplicative random effects)	3	-0.0312369	0.00745563	2.79318e-05	0.00132054
OID20618	'FKBP1B	Large artery stroke	Inverse variance weighted (multiplicative random effects)	3	-0.0445187	0.0106929	3.13533e-05	0.00147559
12635_9	'TRDMT1	Large artery stroke	Inverse variance weighted (multiplicative random effects)	2	-0.0524285	0.0127154	3.73628e-05	0.0017505
OID21340	'CES3	Large artery stroke	Inverse variance weighted (multiplicative random effects)	3	0.0483446	0.0118177	4.29796e-05	0.00200462
7935_26	'LARGE	Large artery stroke	Inverse variance weighted (multiplicative random effects)	2	0.0187354	0.00458121	4.32089e-05	0.00200632
3004_67	'PDCD1LG2	Large artery stroke	Inverse variance weighted (multiplicative random effects)	2	-0.016722	0.00412447	5.02772e-05	0.00231496
12378_71	'TAPBP	Large artery stroke	Inverse variance weighted (multiplicative random effects)	2	-0.0501727	0.0123754	5.0301e-05	0.00231496
OID30244	'AHNAK2	Cardioembolic stroke	Inverse variance weighted (multiplicative random effects)	8	0.0487983	0.0121078	5.56995e-05	0.00255212
OID30596	'PSTPIP2	Large artery stroke	Inverse variance weighted (multiplicative random effects)	3	-0.00680823	0.00170008	6.21062e-05	0.00283319
OID30717	'BCHE	Large artery stroke	Inverse variance weighted (multiplicative random effects)	3	-0.0509521	0.0127476	6.41525e-05	0.00291376
12395_86	'DARS2	Large artery stroke	Inverse variance weighted (multiplicative random effects)	2	-0.049784	0.0124937	6.75538e-05	0.0030549
10512_13	'CSF2RB	Large artery stroke	Inverse variance weighted (multiplicative random effects)	2	0.00627956	0.00157723	6.85131e-05	0.00308487
OID20467	'PADI2	Large artery stroke	Inverse variance weighted (multiplicative random effects)	3	-0.0271793	0.0068541	7.32684e-05	0.00328476
5703_26	'OLFM1	Large artery stroke	Inverse variance weighted (multiplicative random effects)	2	-0.032439	0.00819238	7.50579e-05	0.00335055
OID31313	'EFCAB2	Large artery stroke	Inverse variance weighted (multiplicative random effects)	3	-0.0645661	0.0163152	7.57645e-05	0.00336764
OID30239	'ECHS1	Large artery stroke	Inverse variance weighted (multiplicative random effects)	3	0.031553	0.00798329	7.73778e-05	0.00342471
3488_64	'CAT	Large artery stroke	Inverse variance weighted (multiplicative random effects)	2	-0.0758749	0.0193067	8.49515e-05	0.00374399
OID30686	'APOA2	Cardioembolic stroke	Inverse variance weighted (multiplicative random effects)	8	0.0700647	0.0179085	9.1398e-05	0.0040111
18396_10	'AES	Large artery stroke	Inverse variance weighted (multiplicative random effects)	2	-0.034489	0.00885134	9.76022e-05	0.00426538
10558_26	'PCDH9	Large artery stroke	Inverse variance weighted (multiplicative random effects)	2	-0.0924549	0.0237855	0.000101479	0.00441627
18893_26	'GPR56	Large artery stroke	Inverse variance weighted (multiplicative random effects)	2	0.0586029	0.0150931	0.000103281	0.00447594
OID20215	'DDC	Large artery stroke	Inverse variance weighted (multiplicative random effects)	3	-0.0424468	0.010955	0.000106785	0.00460858
OID31292	'SHPK	Large artery stroke	Inverse variance weighted (multiplicative random effects)	3	-0.0594108	0.0154015	0.000114565	0.00492391
16599_38	'GPN1	Large artery stroke	Inverse variance weighted (multiplicative random effects)	2	-0.0670406	0.0174246	0.000119345	0.00510828
7849_3	'QPCT	Large artery stroke	Inverse variance weighted (multiplicative random effects)	2	-0.0495445	0.0129502	0.000130368	0.00555721
OID20373	'RARRES2	Large artery stroke	Inverse variance weighted (multiplicative random effects)	3	0.0271271	0.00712888	0.000141665	0.0060141
9337_43	'TAC1	Large artery stroke	Inverse variance weighted (multiplicative random effects)	2	-0.0228075	0.006023	0.000152638	0.00645363
OID20116	'BOC	Large artery stroke	Inverse variance weighted (multiplicative random effects)	3	0.0540654	0.0143933	0.000172444	0.00726149
OID30577	'SCGB3A1	Large artery stroke	Inverse variance weighted (multiplicative random effects)	3	-0.0217276	0.00583168	0.000194706	0.00816589
8885_6	'CACNA2D3	Large artery stroke	Inverse variance weighted (multiplicative random effects)	2	-0.0749433	0.0201713	0.00020293	0.00847662
OID31430	'ITIH5	Large artery stroke	Inverse variance weighted (multiplicative random effects)	3	-0.0282015	0.0075931	0.000203935	0.00848452
OID31324	'RPE	Cardioembolic stroke	Inverse variance weighted (multiplicative random effects)	8	0.0507294	0.013712	0.000215916	0.00894718
OID20868	'TST	Large artery stroke	Inverse variance weighted (multiplicative random effects)	3	-0.0323155	0.00877311	0.000230076	0.0094961
5491_12	'SPOCK2	Large artery stroke	Inverse variance weighted (multiplicative random effects)	2	-0.0822337	0.0223413	0.000232516	0.00955887
OID21116	'IL1R1	Large artery stroke	Inverse variance weighted (multiplicative random effects)	3	-0.0413098	0.0112267	0.000233605	0.00956586
3329_14	'PGLYRP1	Large artery stroke	Inverse variance weighted (multiplicative random effects)	2	0.0170094	0.00462407	0.000234651	0.00957101
3045_72	'PTN	Large artery stroke	Inverse variance weighted (multiplicative random effects)	2	0.0122387	0.0033528	0.00026194	0.0106423
7980_72	'B3GNT2	Large artery stroke	Inverse variance weighted (multiplicative random effects)	2	-0.030797	0.00847006	0.000276916	0.011207
OID20417	'TGFBI	Large artery stroke	Inverse variance weighted (multiplicative random effects)	3	-0.0503983	0.0138898	0.000285129	0.0114947
9249_17	'TMEM9	Large artery stroke	Inverse variance weighted (multiplicative random effects)	2	-0.0487864	0.0134872	0.000297766	0.0119578
OID20117	'ADH4	Large artery stroke	Inverse variance weighted (multiplicative random effects)	3	0.0466322	0.0129001	0.000300491	0.0120208
18401_18	'ALKBH3	Large artery stroke	Inverse variance weighted (multiplicative random effects)	2	-0.039044	0.010824	0.000309573	0.0123367
OID20398	'IGFBP3	Large artery stroke	Inverse variance weighted (multiplicative random effects)	3	-0.0524764	0.0145561	0.000312029	0.0123871
OID21127	'B4GAT1	Large artery stroke	Inverse variance weighted (multiplicative random effects)	3	-0.0677747	0.0188442	0.000322424	0.0127511
OID30293	'ECHDC3	Large artery stroke	Inverse variance weighted (multiplicative random effects)	3	0.0471483	0.0131144	0.000324203	0.0127631
8842_16	'GRAMD1C	Large artery stroke	Inverse variance weighted (multiplicative random effects)	2	-0.0417752	0.0116238	0.000325735	0.0127631
6077_63	'CECR1	Large artery stroke	Inverse variance weighted (multiplicative random effects)	2	-0.0755102	0.0210137	0.000326408	0.0127631
17327_3	'CNPY3	Large artery stroke	Inverse variance weighted (multiplicative random effects)	2	-0.0517076	0.0144017	0.000330178	0.0128621
OID21167	'NINJ1	Large artery stroke	Inverse variance weighted (multiplicative random effects)	3	-0.0745403	0.020772	0.000332576	0.0128672
3293_2	'CD5L	Large artery stroke	Inverse variance weighted (multiplicative random effects)	2	-0.0249396	0.00695016	0.000332783	0.0128672
16060_99	'NID2	Large artery stroke	Inverse variance weighted (multiplicative random effects)	2	-0.0295333	0.00827228	0.000356769	0.0137435
4775_34	'GSN	Large artery stroke	Inverse variance weighted (multiplicative random effects)	2	-0.0360322	0.0101027	0.000361637	0.0138797
18342_2	'PSAT1	Large artery stroke	Inverse variance weighted (multiplicative random effects)	2	0.0229455	0.00646631	0.000387493	0.0148173
13940_19	'IFI16	Large artery stroke	Inverse variance weighted (multiplicative random effects)	2	0.033806	0.00953572	0.000392315	0.0149468
13536_56	'POLI	Large artery stroke	Inverse variance weighted (multiplicative random effects)	2	-0.0377192	0.0106842	0.000414997	0.0157532
17781_191	'MAP1LC3A	Large artery stroke	Inverse variance weighted (multiplicative random effects)	2	-0.0528951	0.0149968	0.000420137	0.0158903
5358_3	'OMD	Large artery stroke	Inverse variance weighted (multiplicative random effects)	2	-0.10266	0.0291152	0.000421925	0.0159002
16853_5	'NRK1	Large artery stroke	Inverse variance weighted (multiplicative random effects)	2	-0.0766965	0.0218828	0.00045681	0.0171526
OID30196	'SEL1L	Cardioembolic stroke	Inverse variance weighted (multiplicative random effects)	8	0.0327063	0.00933975	0.00046206	0.0172874
OID30250	'EPPK1	Cardioembolic stroke	Inverse variance weighted (multiplicative random effects)	8	0.0376876	0.0107719	0.000467521	0.017429
5457_5	'COLEC12	Large artery stroke	Inverse variance weighted (multiplicative random effects)	2	-0.0601901	0.0172162	0.000472058	0.0175353
OID21201	'KLK12	Large artery stroke	Inverse variance weighted (multiplicative random effects)	3	-0.0606635	0.0173594	0.000474853	0.0175763
12348_46	'SARS2	Large artery stroke	Inverse variance weighted (multiplicative random effects)	2	-0.0433537	0.0124529	0.000498781	0.0183047
5301_7	'CCL11	Large artery stroke	Inverse variance weighted (multiplicative random effects)	2	-0.0501132	0.0143967	0.000499765	0.0183047
5704_74	'GZMM	Large artery stroke	Inverse variance weighted (multiplicative random effects)	2	-0.0870256	0.0250012	0.000499811	0.0183047
OID30430	'FOLH1	Cardioembolic stroke	Inverse variance weighted (multiplicative random effects)	8	0.0593207	0.0170831	0.000515678	0.0188195
3044_3	'CCL18	Large artery stroke	Inverse variance weighted (multiplicative random effects)	2	-0.0946434	0.0274916	0.000576087	0.0209506
9876_20	'ALDOC	Large artery stroke	Inverse variance weighted (multiplicative random effects)	2	-0.0203185	0.00591229	0.000588935	0.0213433
15470_11	'HEXB	Large artery stroke	Inverse variance weighted (multiplicative random effects)	2	0.0363439	0.0105918	0.000600615	0.0215964
11208_15	'NAGPA	Large artery stroke	Inverse variance weighted (multiplicative random effects)	2	-0.0470838	0.0137226	0.000601106	0.0215964
18172_71	'ASF1A	Large artery stroke	Inverse variance weighted (multiplicative random effects)	2	-0.0470806	0.0137235	0.00060215	0.0215964
OID30785	'PLG	Large artery stroke	Inverse variance weighted (multiplicative random effects)	3	0.111991	0.0326579	0.000605361	0.021637
5638_23	'COLGALT1	Large artery stroke	Inverse variance weighted (multiplicative random effects)	2	-0.00181654	0.000529948	0.000608577	0.0216774
4960_72	'ANXA1	Ischemic stroke	Inverse variance weighted (multiplicative random effects)	22	0.0731266	0.0213827	0.000626436	0.0222374
OID21377	'GALNT7	Large artery stroke	Inverse variance weighted (multiplicative random effects)	3	-0.10053	0.0295112	0.000658037	0.0232797
OID21057	'NTRK3	Large artery stroke	Inverse variance weighted (multiplicative random effects)	3	-0.0581504	0.0171042	0.000674401	0.0237778
3470_1	'SELE	Large artery stroke	Inverse variance weighted (multiplicative random effects)	2	-0.0672168	0.019914	0.000737196	0.025904
12437_18	'ULK3	Large artery stroke	Inverse variance weighted (multiplicative random effects)	2	-0.0292511	0.00870514	0.000778836	0.027275
OID31108	'FGFBP3	Large artery stroke	Inverse variance weighted (multiplicative random effects)	3	-0.0802128	0.0238994	0.000790005	0.0275733
11212_7	'TXNDC5	Large artery stroke	Inverse variance weighted (multiplicative random effects)	2	-0.0322591	0.00964496	0.000823836	0.0286579
OID20665	'FASLG	Large artery stroke	Inverse variance weighted (multiplicative random effects)	3	0.062668	0.0187792	0.000846596	0.0293261
OID30228	'PECR	Cardioembolic stroke	Inverse variance weighted (multiplicative random effects)	8	0.0374987	0.0112392	0.000848684	0.0293261
3796_79	'ANGPTL4	Large artery stroke	Inverse variance weighted (multiplicative random effects)	2	-0.0478361	0.0143461	0.000854748	0.0294379
OID20665	'FASLG	Cardioembolic stroke	Inverse variance weighted (multiplicative random effects)	8	0.0495426	0.0148884	0.000876012	0.0300706
3343_1	'ACY1	Large artery stroke	Inverse variance weighted (multiplicative random effects)	2	0.05064	0.0152273	0.000882275	0.030186
OID30413	'GM2A	Large artery stroke	Inverse variance weighted (multiplicative random effects)	3	0.0584588	0.0176012	0.00089598	0.0305544
15633_6	'RBP4	Large artery stroke	Inverse variance weighted (multiplicative random effects)	2	-0.0103199	0.00311567	0.000925457	0.0314565
OID20458	'CXCL14	Large artery stroke	Inverse variance weighted (multiplicative random effects)	3	-0.0468267	0.0141624	0.000945028	0.0320171
OID31526	'RBP7	Ischemic stroke	Inverse variance weighted (multiplicative random effects)	23	0.0956465	0.0290591	0.00099675	0.0335586
OID31110	'PLB1	Cardioembolic stroke	Inverse variance weighted (multiplicative random effects)	8	0.0485727	0.0147576	0.000996983	0.0335586
5810_25	'TDGF1	Large artery stroke	Inverse variance weighted (multiplicative random effects)	2	-0.0383821	0.0116936	0.00102955	0.0344642
OID20128	'LEPR	Cardioembolic stroke	Inverse variance weighted (multiplicative random effects)	8	0.0231712	0.00705994	0.00103051	0.0344642
OID30348	'FAM20A	Large artery stroke	Inverse variance weighted (multiplicative random effects)	3	0.0631736	0.0192966	0.00106102	0.0353709
OID20420	'IL10RA	Cardioembolic stroke	Inverse variance weighted (multiplicative random effects)	8	-0.039676	0.0121609	0.00110403	0.0366868
8397_147	'QSOX2	Large artery stroke	Inverse variance weighted (multiplicative random effects)	2	0.00925274	0.00285174	0.00117618	0.0389601
OID20197	'PILRB	Cardioembolic stroke	Inverse variance weighted (multiplicative random effects)	8	0.0272229	0.0084292	0.00123966	0.0409323
OID20550	'COL9A1	Ischemic stroke	Inverse variance weighted (multiplicative random effects)	23	-0.101334	0.0314272	0.00126239	0.041551
OID31031	'SUOX	Cardioembolic stroke	Inverse variance weighted (multiplicative random effects)	8	0.0439637	0.0136442	0.00127231	0.0417453
4468_21	'SPHK2	Large artery stroke	Inverse variance weighted (multiplicative random effects)	2	-0.0377769	0.0117582	0.00131436	0.0429291
OID20456	'IL17F	Large artery stroke	Inverse variance weighted (multiplicative random effects)	3	-0.0400927	0.0124809	0.00131664	0.0429291
17783_9	'MMAB	Large artery stroke	Inverse variance weighted (multiplicative random effects)	2	-0.0409538	0.0127663	0.00133674	0.0434482
13580_2	'UAP1	Large artery stroke	Inverse variance weighted (multiplicative random effects)	2	-0.0476898	0.014908	0.0013793	0.044692
OID20283	'SEMA7A	Large artery stroke	Inverse variance weighted (multiplicative random effects)	3	-0.113166	0.0353954	0.0013877	0.0448246
OID21306	'CALB1	Cardioembolic stroke	Inverse variance weighted (multiplicative random effects)	8	-0.0516708	0.0162515	0.00147553	0.0474276
7128_9	'VWA2	Large artery stroke	Inverse variance weighted (multiplicative random effects)	2	-0.0581265	0.018284	0.00147741	0.0474276
OID30971	'TEX101	Cardioembolic stroke	Inverse variance weighted (multiplicative random effects)	8	0.0508041	0.0160339	0.00153205	0.0490302
15503_20	'LEFTY2	Large artery stroke	Inverse variance weighted (multiplicative random effects)	2	-0.0757411	0.023983	0.00158791	0.0506622
OID30924	'LRRC38	Ischemic stroke	Inverse variance weighted (multiplicative random effects)	23	0.073289	0.0232903	0.00165091	0.0525036
6392_7	'WISP2	Large artery stroke	Inverse variance weighted (multiplicative random effects)	2	-0.0320733	0.0101952	0.00165572	0.0525036
9398_30	'GALP	Large artery stroke	Inverse variance weighted (multiplicative random effects)	2	0.0211796	0.00674582	0.00169144	0.0534732
15540_6	'VIM	Ischemic stroke	Inverse variance weighted (multiplicative random effects)	22	0.0954541	0.0304529	0.00172156	0.0542603
2515_14	'GFRA2	Large artery stroke	Inverse variance weighted (multiplicative random effects)	2	0.0298367	0.00955204	0.00178656	0.0561389
8013_9	'LMAN2L	Large artery stroke	Inverse variance weighted (multiplicative random effects)	2	-0.0674279	0.0216355	0.00182987	0.0573268
OID30565	'NXPH3	Large artery stroke	Inverse variance weighted (multiplicative random effects)	3	-0.0522458	0.0168507	0.00193186	0.0603401
OID20119	'EPHX2	Large artery stroke	Inverse variance weighted (multiplicative random effects)	3	0.096858	0.0312816	0.00195935	0.0609698
5939_42	'TNFSF12	Large artery stroke	Inverse variance weighted (multiplicative random effects)	2	-0.105125	0.0339589	0.00196374	0.0609698
OID30686	'APOA2	Ischemic stroke	Inverse variance weighted (multiplicative random effects)	23	0.0894775	0.0291426	0.00213819	0.0661883
OID30419	'PSAP	Large artery stroke	Inverse variance weighted (multiplicative random effects)	3	-0.0470894	0.015349	0.0021556	0.0665293
OID30676	'PI16	Large artery stroke	Inverse variance weighted (multiplicative random effects)	3	0.0574293	0.0187293	0.00216745	0.0666971
4831_4	'SELL	Large artery stroke	Inverse variance weighted (multiplicative random effects)	2	-0.0980417	0.032091	0.00224977	0.0690261
OID21481	'C4BPB	Cardioembolic stroke	Inverse variance weighted (multiplicative random effects)	8	-0.0349384	0.0114662	0.00231072	0.0706878
15533_97	'MSR1	Ischemic stroke	Inverse variance weighted (multiplicative random effects)	22	0.154418	0.0508273	0.00238074	0.0726161
OID30347	'MELTF	Large artery stroke	Inverse variance weighted (multiplicative random effects)	3	-0.0895447	0.0295264	0.00242374	0.0737115
14116_129	'S100A4	Large artery stroke	Inverse variance weighted (multiplicative random effects)	2	-0.0952741	0.0314469	0.00244811	0.0742355
OID30781	'F13B	Cardioembolic stroke	Inverse variance weighted (multiplicative random effects)	8	-0.0402923	0.0133129	0.00247342	0.0747849
OID30495	'CPOX	Cardioembolic stroke	Inverse variance weighted (multiplicative random effects)	8	0.0541861	0.0179795	0.00258025	0.0777891
OID21189	'UXS1	Large artery stroke	Inverse variance weighted (multiplicative random effects)	3	-0.0986533	0.032764	0.00260367	0.0782682
2579_17	'MMP9	Large artery stroke	Inverse variance weighted (multiplicative random effects)	2	-0.0204496	0.00680615	0.0026595	0.0797159
16781_2	'ENGASE	Large artery stroke	Inverse variance weighted (multiplicative random effects)	2	0.0250698	0.00834634	0.0026673	0.0797201
OID21415	'RSPO3	Large artery stroke	Inverse variance weighted (multiplicative random effects)	3	-0.0660176	0.0220304	0.00272953	0.0813462
11098_1	'PDXK	Cardioembolic stroke	Inverse variance weighted (multiplicative random effects)	8	-0.0461373	0.0154669	0.0028546	0.0848307
OID31113	'YAP1	Cardioembolic stroke	Inverse variance weighted (multiplicative random effects)	8	0.0605474	0.0204118	0.00301409	0.0893151
OID21043	'FABP5	Cardioembolic stroke	Inverse variance weighted (multiplicative random effects)	8	0.0626104	0.0211248	0.00303829	0.0897763
OID20887	'HMOX2	Large artery stroke	Inverse variance weighted (multiplicative random effects)	3	0.0538672	0.0182752	0.00320301	0.0943753
6551_94	'SERPINA12	Large artery stroke	Inverse variance weighted (multiplicative random effects)	2	-0.048949	0.0166287	0.00324364	0.0953026
9185_15	'TFF1	Large artery stroke	Inverse variance weighted (multiplicative random effects)	2	-0.0886321	0.0301426	0.00327764	0.0960304
4866_59	'NTRK2	Large artery stroke	Inverse variance weighted (multiplicative random effects)	2	-0.110014	0.0374928	0.00334342	0.0974566
6416_8	'GKN2	Cardioembolic stroke	Inverse variance weighted (multiplicative random effects)	8	-0.0275834	0.00940095	0.00334506	0.0974566
3040_59	'CCL3	Cardioembolic stroke	Inverse variance weighted (multiplicative random effects)	8	0.0267025	0.00910505	0.0033601	0.0976211
OID30665	'OLFM4	Large artery stroke	Inverse variance weighted (multiplicative random effects)	3	0.032716	0.0111613	0.00337648	0.0978239
OID20515	'FOXO1	Large artery stroke	Inverse variance weighted (multiplicative random effects)	3	-0.0375873	0.0128519	0.0034484	0.0996301
OID30419	'PSAP	Cardioembolic stroke	Inverse variance weighted (multiplicative random effects)	8	0.0426769	0.0146407	0.00355746	0.102496
15576_158	'RNASE3	Large artery stroke	Inverse variance weighted (multiplicative random effects)	2	0.0269757	0.00925836	0.00357215	0.102635
OID21004	'CCL2	Cardioembolic stroke	Inverse variance weighted (multiplicative random effects)	8	0.0235192	0.00807676	0.00359177	0.102683
15570_99	'CR2	Ischemic stroke	Inverse variance weighted (multiplicative random effects)	22	0.189916	0.0652231	0.00359356	0.102683
OID30690	'FCN1	Cardioembolic stroke	Inverse variance weighted (multiplicative random effects)	8	0.0606633	0.0208668	0.00364715	0.103877
OID30205	'SNED1	Large artery stroke	Inverse variance weighted (multiplicative random effects)	3	-0.0524032	0.0180298	0.00365531	0.103877
OID21343	'RTBDN	Large artery stroke	Inverse variance weighted (multiplicative random effects)	3	-0.104058	0.0358423	0.00369338	0.104673
11140_56	'COL1A1	Large artery stroke	Inverse variance weighted (multiplicative random effects)	2	-0.0654445	0.022563	0.00372548	0.105088
OID20753	'MEPE	Large artery stroke	Inverse variance weighted (multiplicative random effects)	3	-0.0992816	0.0342323	0.00372888	0.105088
4535_50	'BST1	Large artery stroke	Inverse variance weighted (multiplicative random effects)	2	-0.0667412	0.0230233	0.00374523	0.105088
OID20531	'STX8	Large artery stroke	Inverse variance weighted (multiplicative random effects)	3	-0.0412129	0.0142183	0.00374845	0.105088
2731_29	'POR	Large artery stroke	Inverse variance weighted (multiplicative random effects)	2	0.0538241	0.0185783	0.00376578	0.10529
8866_53	'QPCTL	Large artery stroke	Inverse variance weighted (multiplicative random effects)	2	0.0107096	0.00371235	0.00391596	0.109196
9204_33	'POMC	Large artery stroke	Inverse variance weighted (multiplicative random effects)	2	0.0247616	0.00862272	0.00408316	0.113553
11510_31	'APOL1	Large artery stroke	Inverse variance weighted (multiplicative random effects)	2	-0.037762	0.0131544	0.0040961	0.11361
OID20522	'EPO	Large artery stroke	Inverse variance weighted (multiplicative random effects)	3	-0.114544	0.0400242	0.00421162	0.116503
OID31042	'BRSK2	Large artery stroke	Inverse variance weighted (multiplicative random effects)	3	-0.0356066	0.0124555	0.00425373	0.117356
OID20524	'DAPP1	Large artery stroke	Inverse variance weighted (multiplicative random effects)	3	-0.0616249	0.0215988	0.00432867	0.119107
4278_14	'P4HB	Cardioembolic stroke	Inverse variance weighted (multiplicative random effects)	8	-0.0410251	0.0144133	0.00442244	0.121366
OID30635	'RIDA	Large artery stroke	Inverse variance weighted (multiplicative random effects)	3	0.0525068	0.0184644	0.00445958	0.122063
OID20588	'MGMT	Large artery stroke	Inverse variance weighted (multiplicative random effects)	3	-0.0443195	0.0156211	0.00455166	0.124257
9076_25	'PENK	Large artery stroke	Inverse variance weighted (multiplicative random effects)	2	-0.0877437	0.0310191	0.00467376	0.127256
3299_29	'CNTN5	Large artery stroke	Inverse variance weighted (multiplicative random effects)	2	-0.0377983	0.01337	0.00469731	0.127563
OID20315	'ITGB2	Cardioembolic stroke	Inverse variance weighted (multiplicative random effects)	8	0.0450019	0.0159234	0.0047111	0.127605
OID30260	'AHNAK	Cardioembolic stroke	Inverse variance weighted (multiplicative random effects)	8	0.0356574	0.0126249	0.00473729	0.127981
OID30109	'GASK1A	Large artery stroke	Inverse variance weighted (multiplicative random effects)	3	-0.0467025	0.0165468	0.00476592	0.128421
OID20227	'FBP1	Large artery stroke	Inverse variance weighted (multiplicative random effects)	3	0.0814943	0.0288878	0.00478648	0.128641
OID30282	'POMC	Cardioembolic stroke	Inverse variance weighted (multiplicative random effects)	8	-0.039127	0.0138905	0.00485011	0.130015
OID30672	'RNASE1	Cardioembolic stroke	Inverse variance weighted (multiplicative random effects)	8	0.0469941	0.0166916	0.00487122	0.130246
13552_7	'SWAP70	Cardioembolic stroke	Inverse variance weighted (multiplicative random effects)	8	-0.033442	0.011885	0.00489599	0.130572
OID20294	'CSTB	Cardioembolic stroke	Inverse variance weighted (multiplicative random effects)	8	0.0406205	0.0144476	0.00493005	0.131144
OID30499	'CEMIP2	Large artery stroke	Inverse variance weighted (multiplicative random effects)	3	-0.119017	0.0423626	0.00496202	0.131658
6715_63	'ALPPL2	Cardioembolic stroke	Inverse variance weighted (multiplicative random effects)	8	-0.0367337	0.0130894	0.00501021	0.132598
9747_48	'MARK3	Large artery stroke	Inverse variance weighted (multiplicative random effects)	2	-0.0236712	0.00844605	0.0050687	0.133806
5586_66	'MINPP1	Ischemic stroke	Inverse variance weighted (multiplicative random effects)	22	0.134933	0.0482133	0.00513138	0.134842
16079_2	'TEC	Large artery stroke	Inverse variance weighted (multiplicative random effects)	2	-0.0590129	0.0210887	0.00513688	0.134842
11480_1	'ALDH3A1	Cardioembolic stroke	Inverse variance weighted (multiplicative random effects)	8	-0.0299687	0.0107119	0.00514684	0.134842
OID21195	'CA11	Ischemic stroke	Inverse variance weighted (multiplicative random effects)	23	-0.108299	0.0387294	0.00516929	0.13509
4874_3	'ANG	Ischemic stroke	Inverse variance weighted (multiplicative random effects)	22	0.107059	0.038633	0.00558547	0.1456
OID20979	'MATN3	Ischemic stroke	Inverse variance weighted (multiplicative random effects)	23	-0.176719	0.06385	0.005645	0.146784
6364_7	'TAPBPL	Large artery stroke	Inverse variance weighted (multiplicative random effects)	2	-0.0146513	0.00529941	0.00569731	0.147775
2780_35	'LTF	Large artery stroke	Inverse variance weighted (multiplicative random effects)	2	0.0108069	0.00391239	0.00574095	0.14827
10815_2	'HABP4	Cardioembolic stroke	Inverse variance weighted (multiplicative random effects)	8	-0.0286769	0.0103827	0.00574491	0.14827
OID30891	'MRI1	Cardioembolic stroke	Inverse variance weighted (multiplicative random effects)	8	0.0449864	0.0163211	0.00584535	0.150489
10851_77	'EBI3	Large artery stroke	Inverse variance weighted (multiplicative random effects)	2	0.0201843	0.00733334	0.00591592	0.15193
5105_2	'RTN4R	Large artery stroke	Inverse variance weighted (multiplicative random effects)	2	-0.0118071	0.00429744	0.00600547	0.153849
OID30232	'HSBP1	Cardioembolic stroke	Inverse variance weighted (multiplicative random effects)	8	0.0471445	0.017171	0.00604017	0.154358
OID30722	'ITIH1	Large artery stroke	Inverse variance weighted (multiplicative random effects)	3	-0.0658995	0.0240119	0.00606128	0.154518
OID21388	'NPY	Large artery stroke	Inverse variance weighted (multiplicative random effects)	3	-0.0433339	0.0158109	0.0061299	0.155885
OID20766	'PRELP	Ischemic stroke	Inverse variance weighted (multiplicative random effects)	23	-0.0897342	0.0328224	0.00625832	0.158763
OID21365	'RBP2	Cardioembolic stroke	Inverse variance weighted (multiplicative random effects)	8	0.0442564	0.0161951	0.00628158	0.158965
9015_1	'PRG3	Large artery stroke	Inverse variance weighted (multiplicative random effects)	2	0.0409654	0.0150274	0.00640999	0.161821
OID21469	'CD300LF	Cardioembolic stroke	Inverse variance weighted (multiplicative random effects)	8	0.0319702	0.0117625	0.00656809	0.165411
6493_9	'CPZ	Large artery stroke	Inverse variance weighted (multiplicative random effects)	2	0.044755	0.0164804	0.00661465	0.166181
2658_27	'NTRK3	Large artery stroke	Inverse variance weighted (multiplicative random effects)	2	-0.0928993	0.0342369	0.00665907	0.166894
OID30631	'GCHFR	Cardioembolic stroke	Inverse variance weighted (multiplicative random effects)	8	0.0406959	0.015029	0.00677246	0.169328
17776_15	'PECR	Large artery stroke	Inverse variance weighted (multiplicative random effects)	2	-0.0218944	0.00812446	0.0070416	0.175635
OID21129	'PILRA	Cardioembolic stroke	Inverse variance weighted (multiplicative random effects)	8	0.0298385	0.0110853	0.00710863	0.176478
OID21317	'CNPY4	Large artery stroke	Inverse variance weighted (multiplicative random effects)	3	-0.0346491	0.0128752	0.00712061	0.176478
3234_23	'CCDC80	Large artery stroke	Inverse variance weighted (multiplicative random effects)	2	-0.030353	0.0112799	0.00712633	0.176478
OID20216	'SDC4	Large artery stroke	Inverse variance weighted (multiplicative random effects)	3	-0.0388262	0.0144719	0.00729927	0.17975
8970_9	'RIPK2	Large artery stroke	Inverse variance weighted (multiplicative random effects)	2	-0.0638114	0.0237863	0.00730321	0.17975
5688_65	'CBLN4	Large artery stroke	Inverse variance weighted (multiplicative random effects)	2	-0.0458964	0.0171104	0.00731027	0.17975
6605_17	'IGFALS	Large artery stroke	Inverse variance weighted (multiplicative random effects)	2	-0.0735492	0.0274805	0.00744137	0.182542
OID30787	'FN1	Ischemic stroke	Inverse variance weighted (multiplicative random effects)	23	-0.0637858	0.0238679	0.00753004	0.184138
OID20279	'CRTAC1	Cardioembolic stroke	Inverse variance weighted (multiplicative random effects)	8	0.0436316	0.0163297	0.00754184	0.184138
OID30338	'TPK1	Large artery stroke	Inverse variance weighted (multiplicative random effects)	3	-0.0822554	0.0307954	0.00756197	0.184197
10512_13	'CSF2RB	Ischemic stroke	Inverse variance weighted (multiplicative random effects)	22	0.0941014	0.0352521	0.00759909	0.184471
18313_4	'ASRGL1	Large artery stroke	Inverse variance weighted (multiplicative random effects)	2	-0.0285026	0.0106793	0.00760871	0.184471
OID21402	'FGF21	Cardioembolic stroke	Inverse variance weighted (multiplicative random effects)	8	0.0391633	0.0146961	0.00770157	0.186288
14091_42	'CBR3	Large artery stroke	Inverse variance weighted (multiplicative random effects)	2	-0.0288167	0.0108184	0.00772928	0.18647
9793_145	'IGDCC4	Large artery stroke	Inverse variance weighted (multiplicative random effects)	2	-0.0641621	0.024094	0.00774494	0.18647
OID20945	'LY96	Large artery stroke	Inverse variance weighted (multiplicative random effects)	3	-0.0879176	0.0330261	0.00776632	0.186553
OID20398	'IGFBP3	Ischemic stroke	Inverse variance weighted (multiplicative random effects)	23	-0.0847919	0.031894	0.00784765	0.188072
5109_24	'NRCAM	Large artery stroke	Inverse variance weighted (multiplicative random effects)	2	-0.0729195	0.0274401	0.00787453	0.188283
9264_11	'CTSO	Large artery stroke	Inverse variance weighted (multiplicative random effects)	2	0.0320632	0.012071	0.0079025	0.188518
OID20557	'MAPK9	Large artery stroke	Inverse variance weighted (multiplicative random effects)	3	-0.0386841	0.0145705	0.00793191	0.188787
18899_82	'HDGFRP3	Large artery stroke	Inverse variance weighted (multiplicative random effects)	2	-0.0412992	0.0155633	0.00796313	0.189097
5066_134	'CD300C	Ischemic stroke	Inverse variance weighted (multiplicative random effects)	22	0.187841	0.071156	0.00829434	0.196514
10800_15	'SERPINH1	Large artery stroke	Inverse variance weighted (multiplicative random effects)	2	-0.0327398	0.0124087	0.00832843	0.196873
7769_29	'SH3BP2	Large artery stroke	Inverse variance weighted (multiplicative random effects)	2	-0.0194794	0.00738671	0.00836207	0.19722
10940_25	'SRL	Ischemic stroke	Inverse variance weighted (multiplicative random effects)	22	0.0985029	0.0374563	0.00854326	0.2009
OID30204	'AIF1L	Large artery stroke	Inverse variance weighted (multiplicative random effects)	3	0.0421734	0.0160443	0.00857487	0.2009
8364_74	'UST	Large artery stroke	Inverse variance weighted (multiplicative random effects)	2	-0.0526772	0.0200407	0.00857606	0.2009
17836_17	'S100A16	Large artery stroke	Inverse variance weighted (multiplicative random effects)	2	-0.0184589	0.00703824	0.00872463	0.203921
8300_82	'PEX14	Large artery stroke	Inverse variance weighted (multiplicative random effects)	2	-0.0232071	0.00885581	0.00877873	0.204726
OID20860	'KRT5	Large artery stroke	Inverse variance weighted (multiplicative random effects)	3	-0.0356847	0.0136247	0.00881594	0.204989
3316_58	'SERPIND1	Large artery stroke	Inverse variance weighted (multiplicative random effects)	2	-0.00638333	0.0024377	0.00882944	0.204989
15535_3	'PRSS27	Large artery stroke	Inverse variance weighted (multiplicative random effects)	2	-0.0677379	0.0258759	0.00885002	0.205009
10940_25	'SRL	Large artery stroke	Inverse variance weighted (multiplicative random effects)	2	-0.0294262	0.0112461	0.00888173	0.205286
OID30364	'KLK3	Cardioembolic stroke	Inverse variance weighted (multiplicative random effects)	8	-0.0293798	0.0112578	0.00906165	0.208981
5630_48	'CD300A	Ischemic stroke	Inverse variance weighted (multiplicative random effects)	22	0.166887	0.0643567	0.00951012	0.218838
OID20777	'PON3	Ischemic stroke	Inverse variance weighted (multiplicative random effects)	23	-0.0637296	0.0246074	0.00960151	0.220453
OID20863	'NOS1	Ischemic stroke	Inverse variance weighted (multiplicative random effects)	23	-0.0861664	0.0332883	0.00963983	0.220845
OID30687	'TCN1	Cardioembolic stroke	Inverse variance weighted (multiplicative random effects)	8	0.0275093	0.0106372	0.00970561	0.221698
OID30733	'APOA4	Ischemic stroke	Inverse variance weighted (multiplicative random effects)	23	-0.0689509	0.0266668	0.00971969	0.221698
OID20977	'IPCEF1	Large artery stroke	Inverse variance weighted (multiplicative random effects)	3	-0.0697345	0.0270062	0.0098181	0.223453
5691_2	'CRISPLD2	Large artery stroke	Inverse variance weighted (multiplicative random effects)	2	-0.0376425	0.014588	0.00986944	0.224131
11145_72	'KIAA1549L	Cardioembolic stroke	Inverse variance weighted (multiplicative random effects)	8	-0.0451776	0.0175286	0.00995575	0.225579
2609_59	'CST3	Ischemic stroke	Inverse variance weighted (multiplicative random effects)	22	0.1348	0.0523206	0.00998296	0.225579
3220_40	'RET	Large artery stroke	Inverse variance weighted (multiplicative random effects)	2	-0.0184358	0.00715792	0.0100071	0.225579
OID21154	'TFF1	Large artery stroke	Inverse variance weighted (multiplicative random effects)	3	0.0558629	0.0216931	0.01002	0.225579
OID31362	'RAB2B	Large artery stroke	Inverse variance weighted (multiplicative random effects)	3	-0.0241658	0.00939709	0.0101222	0.227078
13671_40	'ELANE	Ischemic stroke	Inverse variance weighted (multiplicative random effects)	22	0.105313	0.0409562	0.0101302	0.227078
OID21252	'EGFL7	Large artery stroke	Inverse variance weighted (multiplicative random effects)	3	-0.0522719	0.0203502	0.0102104	0.22776
6580_29	'PZP	Large artery stroke	Inverse variance weighted (multiplicative random effects)	2	-0.0281045	0.0109422	0.0102158	0.22776
16818_200	'CDCP1	Ischemic stroke	Inverse variance weighted (multiplicative random effects)	22	0.0931671	0.0362789	0.0102263	0.22776
OID20712	'DNER	Large artery stroke	Inverse variance weighted (multiplicative random effects)	3	-0.0613585	0.0239315	0.0103496	0.230013
16613_3	'CDH17	Large artery stroke	Inverse variance weighted (multiplicative random effects)	2	-0.047457	0.0185217	0.0104002	0.230645
6434_18	'AOC2	Large artery stroke	Inverse variance weighted (multiplicative random effects)	2	-0.0482732	0.01885	0.0104397	0.231028
4160_49	'MMP2	Large artery stroke	Inverse variance weighted (multiplicative random effects)	2	-0.070849	0.0276757	0.010468	0.231163
OID20768	'LTBR	Ischemic stroke	Inverse variance weighted (multiplicative random effects)	23	-0.114701	0.0448426	0.0105319	0.231708
6472_40	'PMEL	Large artery stroke	Inverse variance weighted (multiplicative random effects)	2	-0.0684255	0.0267529	0.0105373	0.231708
5671_1	'CTRB1	Large artery stroke	Inverse variance weighted (multiplicative random effects)	2	-0.066096	0.0258573	0.0105828	0.232219
OID30356	'ACADSB	Large artery stroke	Inverse variance weighted (multiplicative random effects)	3	-0.0470516	0.018417	0.0106251	0.232657
17140_57	'PDGFD	Ischemic stroke	Inverse variance weighted (multiplicative random effects)	22	0.111332	0.043654	0.0107621	0.235162
OID30189	'VSIG10L	Large artery stroke	Inverse variance weighted (multiplicative random effects)	3	-0.0477201	0.0187237	0.0108144	0.235808
OID20284	'LGALS3	Large artery stroke	Inverse variance weighted (multiplicative random effects)	3	-0.142438	0.0559376	0.010885	0.236851
OID20257	'PEAR1	Large artery stroke	Inverse variance weighted (multiplicative random effects)	3	-0.137315	0.0539624	0.0109388	0.237345
19176_27	'FAM49B	Large artery stroke	Inverse variance weighted (multiplicative random effects)	2	-0.0188612	0.00741345	0.0109534	0.237345
12646_2	'RPE	Large artery stroke	Inverse variance weighted (multiplicative random effects)	2	-0.0592271	0.0232925	0.0109981	0.23782
OID31524	'SUGP1	Large artery stroke	Inverse variance weighted (multiplicative random effects)	3	-0.0515448	0.0203286	0.0112262	0.242249
19556_12	'CR1	Large artery stroke	Inverse variance weighted (multiplicative random effects)	2	-0.113292	0.0446998	0.0112606	0.242487
OID31371	'VSIG2	Large artery stroke	Inverse variance weighted (multiplicative random effects)	3	-0.0950803	0.0375377	0.0113115	0.243081
8053_16	'DNAJB14	Large artery stroke	Inverse variance weighted (multiplicative random effects)	2	-0.105182	0.0415665	0.0113918	0.244301
OID20713	'BTN2A1	Cardioembolic stroke	Inverse variance weighted (multiplicative random effects)	8	0.0267274	0.0105798	0.0115285	0.246724
OID30583	'MXRA8	Cardioembolic stroke	Inverse variance weighted (multiplicative random effects)	8	0.039983	0.0159045	0.0119391	0.254987
OID31069	'OCLN	Cardioembolic stroke	Inverse variance weighted (multiplicative random effects)	8	0.0331313	0.0131845	0.0119743	0.255072
OID30415	'ASAH1	Large artery stroke	Inverse variance weighted (multiplicative random effects)	3	-0.0426543	0.0169777	0.0119921	0.255072
9026_40	'BTNL8	Large artery stroke	Inverse variance weighted (multiplicative random effects)	2	-0.0857481	0.0341664	0.0120828	0.256475
OID30631	'GCHFR	Ischemic stroke	Inverse variance weighted (multiplicative random effects)	23	0.0932489	0.037193	0.0121703	0.257808
OID30587	'COL5A1	Large artery stroke	Inverse variance weighted (multiplicative random effects)	3	-0.146764	0.058563	0.0122076	0.258072
OID30262	'MAN1A2	Cardioembolic stroke	Inverse variance weighted (multiplicative random effects)	8	0.0377221	0.0150721	0.0123223	0.259967
8356_88	'OXT	Large artery stroke	Inverse variance weighted (multiplicative random effects)	2	0.0120612	0.0048219	0.0123722	0.260493
15322_35	'CRADD	Large artery stroke	Inverse variance weighted (multiplicative random effects)	2	-0.103974	0.0416116	0.0124658	0.261932
5036_50	'TNFAIP6	Cardioembolic stroke	Inverse variance weighted (multiplicative random effects)	8	-0.0485019	0.0194332	0.0125667	0.263521
OID31074	'CDH23	Cardioembolic stroke	Inverse variance weighted (multiplicative random effects)	8	0.031145	0.0124895	0.0126421	0.264568
OID20420	'IL10RA	Large artery stroke	Inverse variance weighted (multiplicative random effects)	3	-0.0298833	0.0119873	0.01267	0.26462
OID20679	'CTSC	Large artery stroke	Inverse variance weighted (multiplicative random effects)	3	-0.0504358	0.0202423	0.0127166	0.265061
OID31405	'PXDNL	Ischemic stroke	Inverse variance weighted (multiplicative random effects)	23	0.0662527	0.0266426	0.0128928	0.268195
10832_24	'B4GALT6	Large artery stroke	Inverse variance weighted (multiplicative random effects)	2	0.00524549	0.00211607	0.0131796	0.273615
15607_56	'PKLR	Large artery stroke	Inverse variance weighted (multiplicative random effects)	2	-0.0639101	0.0257949	0.0132259	0.273675
17675_17	'ACOT13	Large artery stroke	Inverse variance weighted (multiplicative random effects)	2	-0.0584466	0.0235921	0.0132351	0.273675
11178_21	'SVEP1	Ischemic stroke	Inverse variance weighted (multiplicative random effects)	22	0.127457	0.0515186	0.0133612	0.275733
17698_15	'WBP2	Large artery stroke	Inverse variance weighted (multiplicative random effects)	2	-0.152902	0.0618914	0.0134928	0.277898
OID20808	'CDHR1	Cardioembolic stroke	Inverse variance weighted (multiplicative random effects)	8	0.0334382	0.0135795	0.0138006	0.283677
2781_63	'CCL4L1	Ischemic stroke	Inverse variance weighted (multiplicative random effects)	22	0.0952022	0.0387229	0.0139499	0.28618
9964_10	'MYZAP	Large artery stroke	Inverse variance weighted (multiplicative random effects)	2	-0.11475	0.0467039	0.0140113	0.286872
OID30250	'EPPK1	Ischemic stroke	Inverse variance weighted (multiplicative random effects)	23	0.0926793	0.0377969	0.0142052	0.290272
OID20064	'SERPINB5	Large artery stroke	Inverse variance weighted (multiplicative random effects)	3	0.0675803	0.0275781	0.0142656	0.290598
OID20769	'LAMA4	Ischemic stroke	Inverse variance weighted (multiplicative random effects)	23	0.115024	0.0469444	0.014277	0.290598
6947_4	'ST3GAL6	Ischemic stroke	Inverse variance weighted (multiplicative random effects)	22	0.106628	0.0435834	0.0144235	0.292982
OID30718	'HGFAC	Ischemic stroke	Inverse variance weighted (multiplicative random effects)	23	0.0952378	0.0389383	0.0144505	0.292982
OID20487	'IL1RL2	Large artery stroke	Inverse variance weighted (multiplicative random effects)	3	-0.0572425	0.0234145	0.0144953	0.293319
OID20067	'VSTM2L	Cardioembolic stroke	Inverse variance weighted (multiplicative random effects)	8	-0.0454883	0.0186281	0.0146096	0.295057
7849_3	'QPCT	Cardioembolic stroke	Inverse variance weighted (multiplicative random effects)	8	-0.0434551	0.0178064	0.0146701	0.295705
18188_12	'GATM	Ischemic stroke	Inverse variance weighted (multiplicative random effects)	22	0.0871206	0.035712	0.0147063	0.29586
OID20095	'GPR37	Large artery stroke	Inverse variance weighted (multiplicative random effects)	3	0.0276851	0.0113546	0.0147598	0.296364
12633_3	'PTPN9	Large artery stroke	Inverse variance weighted (multiplicative random effects)	2	-0.0446915	0.0183348	0.0147883	0.296364
4960_72	'ANXA1	Large artery stroke	Inverse variance weighted (multiplicative random effects)	2	-0.0147079	0.00603617	0.0148253	0.296535
7163_26	'LACRT	Large artery stroke	Inverse variance weighted (multiplicative random effects)	2	-0.148163	0.0608268	0.0148584	0.296627
4479_14	'SERPING1	Large artery stroke	Inverse variance weighted (multiplicative random effects)	2	-0.037177	0.0152712	0.0149144	0.297174
OID30708	'APOL1	Large artery stroke	Inverse variance weighted (multiplicative random effects)	3	-0.0525846	0.0216186	0.015	0.298237
5687_5	'PRKCSH	Large artery stroke	Inverse variance weighted (multiplicative random effects)	2	-0.022585	0.00928744	0.0150251	0.298237
OID20381	'GP1BA	Cardioembolic stroke	Inverse variance weighted (multiplicative random effects)	8	0.0613464	0.0252434	0.0150907	0.298969
OID30691	'TGOLN2	Large artery stroke	Inverse variance weighted (multiplicative random effects)	3	-0.050153	0.0206521	0.0151628	0.299826
OID30381	'PRG2	Large artery stroke	Inverse variance weighted (multiplicative random effects)	3	0.114307	0.047131	0.0152957	0.301464
OID31069	'OCLN	Ischemic stroke	Inverse variance weighted (multiplicative random effects)	23	0.0883381	0.0364264	0.0153036	0.301464
4990_87	'GP1BA	Ischemic stroke	Inverse variance weighted (multiplicative random effects)	22	0.309429	0.127711	0.015398	0.302412
OID31464	'COL24A1	Ischemic stroke	Inverse variance weighted (multiplicative random effects)	23	0.0987577	0.0407666	0.0154134	0.302412
OID20139	'AGXT	Large artery stroke	Inverse variance weighted (multiplicative random effects)	3	0.0839691	0.0346777	0.0154603	0.302412
12436_84	'GSTO1	Large artery stroke	Inverse variance weighted (multiplicative random effects)	2	-0.0243584	0.0100603	0.015468	0.302412
18173_11	'AKR7A3	Large artery stroke	Inverse variance weighted (multiplicative random effects)	2	0.0579694	0.0239751	0.0156103	0.304395
OID20332	'COL18A1	Cardioembolic stroke	Inverse variance weighted (multiplicative random effects)	8	0.035117	0.0145262	0.015628	0.304395
OID30253	'GATD3	Cardioembolic stroke	Inverse variance weighted (multiplicative random effects)	8	0.0433041	0.0179353	0.0157585	0.306363
17724_3	'WWOX	Large artery stroke	Inverse variance weighted (multiplicative random effects)	2	-0.0506676	0.020996	0.0158132	0.306424
13107_9	'LYPD3	Large artery stroke	Inverse variance weighted (multiplicative random effects)	2	-0.0308551	0.0127869	0.0158205	0.306424
OID21369	'RBP5	Cardioembolic stroke	Inverse variance weighted (multiplicative random effects)	8	0.0470925	0.0195226	0.0158562	0.306544
OID31033	'MCEE	Ischemic stroke	Inverse variance weighted (multiplicative random effects)	23	0.081794	0.0339221	0.015899	0.306577
OID31205	'MAPK13	Cardioembolic stroke	Inverse variance weighted (multiplicative random effects)	8	0.0375003	0.015555	0.0159169	0.306577
OID30151	'PDZD2	Large artery stroke	Inverse variance weighted (multiplicative random effects)	3	-0.0616045	0.0255775	0.0160164	0.307924
15495_9	'FOLR3	Cardioembolic stroke	Inverse variance weighted (multiplicative random effects)	8	0.028367	0.0117882	0.0161111	0.309172
7173_141	'TMEM132C	Large artery stroke	Inverse variance weighted (multiplicative random effects)	2	-0.133172	0.0553928	0.0162106	0.31051
12357_41	'SNAP29	Large artery stroke	Inverse variance weighted (multiplicative random effects)	2	-0.0701795	0.0292037	0.0162567	0.310819
17738_7	'CRNN	Large artery stroke	Inverse variance weighted (multiplicative random effects)	2	0.0337796	0.0140725	0.0163768	0.312542
OID21494	'NELL1	Large artery stroke	Inverse variance weighted (multiplicative random effects)	3	-0.0593318	0.0247563	0.0165462	0.31495
4145_58	'NTF3	Large artery stroke	Inverse variance weighted (multiplicative random effects)	2	-0.0406343	0.0169574	0.0165636	0.31495
13998_26	'ADSSL1	Large artery stroke	Inverse variance weighted (multiplicative random effects)	2	-0.0362953	0.0151613	0.0166682	0.315833
OID21306	'CALB1	Large artery stroke	Inverse variance weighted (multiplicative random effects)	3	-0.0539717	0.0225456	0.0166708	0.315833
3535_84	'DKK1	Large artery stroke	Inverse variance weighted (multiplicative random effects)	2	-0.0421786	0.0176492	0.0168561	0.318719
OID20689	'ENPP7	Large artery stroke	Inverse variance weighted (multiplicative random effects)	3	-0.0359174	0.0150331	0.0168844	0.318719
13397_88	'DEFB4A	Cardioembolic stroke	Inverse variance weighted (multiplicative random effects)	8	-0.028626	0.0119937	0.0169977	0.320133
19289_29	'UROD	Large artery stroke	Inverse variance weighted (multiplicative random effects)	2	-0.0889057	0.0372595	0.0170271	0.320133
9175_48	'DSCAM	Large artery stroke	Inverse variance weighted (multiplicative random effects)	2	-0.0325739	0.0136597	0.0170942	0.320133
8877_22	'EVA1C	Large artery stroke	Inverse variance weighted (multiplicative random effects)	2	-0.049683	0.0208395	0.0171222	0.320133
OID30236	'AAMDC	Cardioembolic stroke	Inverse variance weighted (multiplicative random effects)	8	0.0456118	0.0191352	0.0171416	0.320133
OID30390	'NPTX2	Large artery stroke	Inverse variance weighted (multiplicative random effects)	3	-0.0742006	0.0311295	0.0171439	0.320133
4831_4	'SELL	Ischemic stroke	Inverse variance weighted (multiplicative random effects)	22	0.211555	0.0888618	0.0172787	0.32207
OID20492	'AMN	Large artery stroke	Inverse variance weighted (multiplicative random effects)	3	0.0476426	0.020019	0.0173186	0.322125
2480_58	'TIMP3	Ischemic stroke	Inverse variance weighted (multiplicative random effects)	22	0.0881959	0.0370674	0.0173435	0.322125
OID21165	'SFTPA1	Large artery stroke	Inverse variance weighted (multiplicative random effects)	3	-0.0354295	0.0149069	0.0174677	0.323801
OID21209	'CEP20	Large artery stroke	Inverse variance weighted (multiplicative random effects)	3	-0.0441265	0.0185709	0.017496	0.323801
9076_25	'PENK	Cardioembolic stroke	Inverse variance weighted (multiplicative random effects)	8	-0.0691776	0.029122	0.0175281	0.323819
4430_44	'COLEC11	Cardioembolic stroke	Inverse variance weighted (multiplicative random effects)	8	0.0428718	0.018065	0.0176348	0.325212
13733_5	'IL12B	Cardioembolic stroke	Inverse variance weighted (multiplicative random effects)	8	-0.0278695	0.0117495	0.0176936	0.325719
16074_12	'GRAP2	Large artery stroke	Inverse variance weighted (multiplicative random effects)	2	-0.0661037	0.0278834	0.0177534	0.32593
11287_14	'CYB5A	Large artery stroke	Inverse variance weighted (multiplicative random effects)	2	-0.0471465	0.019893	0.0177878	0.32593
5478_50	'FOLH1	Large artery stroke	Inverse variance weighted (multiplicative random effects)	2	-0.0353313	0.0149098	0.0178035	0.32593
OID20224	'ROR1	Ischemic stroke	Inverse variance weighted (multiplicative random effects)	23	-0.104892	0.0442747	0.0178304	0.32593
OID30159	'MMUT	Large artery stroke	Inverse variance weighted (multiplicative random effects)	3	-0.0594307	0.0251773	0.0182509	0.333031
5605_77	'MFNG	Cardioembolic stroke	Inverse variance weighted (multiplicative random effects)	8	0.0438816	0.018602	0.0183258	0.333813
OID21071	'ITGAM	Cardioembolic stroke	Inverse variance weighted (multiplicative random effects)	8	0.0261278	0.0110859	0.0184311	0.334884
OID20437	'AMBN	Cardioembolic stroke	Inverse variance weighted (multiplicative random effects)	8	0.0359752	0.0152665	0.0184491	0.334884
OID20067	'VSTM2L	Ischemic stroke	Inverse variance weighted (multiplicative random effects)	23	-0.08284	0.0351938	0.0185813	0.336698
19556_12	'CR1	Ischemic stroke	Inverse variance weighted (multiplicative random effects)	22	0.167932	0.0714831	0.018811	0.340267
3283_21	'TGFBI	Large artery stroke	Inverse variance weighted (multiplicative random effects)	2	0.0501363	0.0213551	0.0188874	0.341056
OID30993	'DSCAM	Large artery stroke	Inverse variance weighted (multiplicative random effects)	3	-0.128495	0.0547786	0.0189904	0.342321
OID30488	'AKR7L	Large artery stroke	Inverse variance weighted (multiplicative random effects)	3	-0.103137	0.0439848	0.0190354	0.342538
OID30979	'SPAG1	Large artery stroke	Inverse variance weighted (multiplicative random effects)	3	0.0351282	0.0149899	0.0191063	0.343221
14076_74	'CST4	Large artery stroke	Inverse variance weighted (multiplicative random effects)	2	-0.0654041	0.0279339	0.0192121	0.344526
OID21114	'SOD2	Ischemic stroke	Inverse variance weighted (multiplicative random effects)	23	0.095051	0.0406092	0.0192514	0.344636
OID30883	'C2orf69	Cardioembolic stroke	Inverse variance weighted (multiplicative random effects)	8	0.0430009	0.0184205	0.0195744	0.349287
OID21125	'EFNA1	Cardioembolic stroke	Inverse variance weighted (multiplicative random effects)	8	0.0363195	0.0155588	0.0195784	0.349287
8325_37	'ADH4	Large artery stroke	Inverse variance weighted (multiplicative random effects)	2	-0.00685089	0.00293788	0.0197049	0.350879
OID20944	'GPC5	Large artery stroke	Inverse variance weighted (multiplicative random effects)	3	-0.0266962	0.0114551	0.0197792	0.350879
12387_7	'PDLIM4	Large artery stroke	Inverse variance weighted (multiplicative random effects)	2	-0.121826	0.0522843	0.0198026	0.350879
15576_158	'RNASE3	Ischemic stroke	Inverse variance weighted (multiplicative random effects)	22	0.145559	0.0624787	0.0198199	0.350879
OID20302	'ST6GAL1	Large artery stroke	Inverse variance weighted (multiplicative random effects)	3	-0.0628766	0.0269923	0.0198363	0.350879
9265_10	'GLIPR1	Cardioembolic stroke	Inverse variance weighted (multiplicative random effects)	8	-0.0266551	0.0114702	0.0201337	0.355535
OID30526	'ZBP1	Cardioembolic stroke	Inverse variance weighted (multiplicative random effects)	8	0.0348022	0.0149895	0.0202451	0.356898
2697_7	'PF4	Ischemic stroke	Inverse variance weighted (multiplicative random effects)	22	0.0985236	0.0424545	0.0203038	0.357325
19262_219	'ACADVL	Large artery stroke	Inverse variance weighted (multiplicative random effects)	2	-0.0605188	0.0260916	0.0203695	0.357877
OID21125	'EFNA1	Large artery stroke	Inverse variance weighted (multiplicative random effects)	3	-0.0740446	0.0319405	0.0204383	0.35848
OID30583	'MXRA8	Large artery stroke	Inverse variance weighted (multiplicative random effects)	3	-0.0388426	0.016768	0.0205321	0.35952
OID30447	'UNC5D	Cardioembolic stroke	Inverse variance weighted (multiplicative random effects)	8	0.0415197	0.0179526	0.0207371	0.362498
18922_27	'CD68	Large artery stroke	Inverse variance weighted (multiplicative random effects)	2	-0.0598549	0.0259032	0.0208489	0.363781
7655_11	'NPPB	Ischemic stroke	Inverse variance weighted (multiplicative random effects)	22	0.102268	0.044269	0.0208804	0.363781
9829_91	'SULT2A1	Large artery stroke	Inverse variance weighted (multiplicative random effects)	2	0.0166603	0.0072147	0.0209318	0.364066
OID21359	'APBB1IP	Ischemic stroke	Inverse variance weighted (multiplicative random effects)	23	0.0821236	0.0355976	0.0210547	0.365088
OID21182	'CAMKK1	Large artery stroke	Inverse variance weighted (multiplicative random effects)	3	-0.0699425	0.0303189	0.0210607	0.365088
9263_57	'SIAE	Large artery stroke	Inverse variance weighted (multiplicative random effects)	2	-0.0779536	0.0338394	0.021243	0.367635
17813_21	'BPHL	Large artery stroke	Inverse variance weighted (multiplicative random effects)	2	-0.0337601	0.0146815	0.0214762	0.371053
OID30924	'LRRC38	Cardioembolic stroke	Inverse variance weighted (multiplicative random effects)	8	0.0349091	0.0151975	0.0216169	0.372545
OID21306	'CALB1	Ischemic stroke	Inverse variance weighted (multiplicative random effects)	23	-0.0811029	0.0353123	0.0216342	0.372545
10571_14	'MGAT1	Cardioembolic stroke	Inverse variance weighted (multiplicative random effects)	8	0.0301338	0.0131276	0.0217076	0.373192
5648_28	'CTRB2	Large artery stroke	Inverse variance weighted (multiplicative random effects)	2	-0.0526796	0.0229837	0.0219032	0.375523
15521_4	'CLSTN1	Large artery stroke	Inverse variance weighted (multiplicative random effects)	2	-0.0349417	0.0152462	0.0219155	0.375523
15339_32	'CFL2	Large artery stroke	Inverse variance weighted (multiplicative random effects)	2	-0.0286778	0.0125189	0.0219775	0.375966
19590_46	'SFTPD	Ischemic stroke	Inverse variance weighted (multiplicative random effects)	22	0.0897958	0.0392398	0.0221152	0.377702
OID31367	'LACRT	Cardioembolic stroke	Inverse variance weighted (multiplicative random effects)	8	0.0395933	0.0173213	0.0222653	0.379034
OID31515	'PALM	Cardioembolic stroke	Inverse variance weighted (multiplicative random effects)	8	0.0760416	0.033267	0.0222661	0.379034
OID21481	'C4BPB	Large artery stroke	Inverse variance weighted (multiplicative random effects)	3	-0.113162	0.0496036	0.022529	0.382883
4971_1	'CTSZ	Large artery stroke	Inverse variance weighted (multiplicative random effects)	2	0.0511633	0.0224379	0.0225946	0.383096
OID20687	'MMP10	Ischemic stroke	Inverse variance weighted (multiplicative random effects)	23	-0.0598271	0.0262414	0.0226152	0.383096
3806_55	'EPHA5	Cardioembolic stroke	Inverse variance weighted (multiplicative random effects)	8	-0.0308222	0.0135435	0.0228585	0.386588
18882_7	'CLSTN2	Ischemic stroke	Inverse variance weighted (multiplicative random effects)	22	0.0974097	0.0428537	0.0230217	0.388715
OID30275	'ADAMTSL4	Ischemic stroke	Inverse variance weighted (multiplicative random effects)	23	0.0952189	0.0419071	0.023078	0.389034
OID20887	'HMOX2	Ischemic stroke	Inverse variance weighted (multiplicative random effects)	23	0.0792946	0.0349136	0.0231369	0.389396
15514_26	'BCHE	Large artery stroke	Inverse variance weighted (multiplicative random effects)	2	-0.0279595	0.0123343	0.0234015	0.393214
OID20102	'CEACAM8	Cardioembolic stroke	Inverse variance weighted (multiplicative random effects)	8	0.030967	0.0136707	0.0234998	0.393644
OID20125	'NPPB	Ischemic stroke	Inverse variance weighted (multiplicative random effects)	23	0.0986786	0.0435702	0.0235239	0.393644
OID21368	'CCN1	Ischemic stroke	Inverse variance weighted (multiplicative random effects)	23	0.0841406	0.0371556	0.0235407	0.393644
18319_7	'PDHX	Ischemic stroke	Inverse variance weighted (multiplicative random effects)	22	0.0907042	0.0400988	0.0236962	0.395587
OID20183	'OLR1	Large artery stroke	Inverse variance weighted (multiplicative random effects)	3	0.0244029	0.0107909	0.023733	0.395587
10512_13	'CSF2RB	Cardioembolic stroke	Inverse variance weighted (multiplicative random effects)	8	-0.0339487	0.0150245	0.0238488	0.396883
OID21005	'CDH15	Cardioembolic stroke	Inverse variance weighted (multiplicative random effects)	8	0.0314485	0.0139222	0.0238911	0.396951
9459_7	'FAS	Large artery stroke	Inverse variance weighted (multiplicative random effects)	2	0.0402648	0.0178319	0.0239443	0.3972
4992_49	'GRN	Ischemic stroke	Inverse variance weighted (multiplicative random effects)	22	0.0890415	0.0395641	0.0244131	0.403923
OID20268	'PDGFRB	Large artery stroke	Inverse variance weighted (multiplicative random effects)	3	0.111165	0.0493993	0.0244272	0.403923
5601_2	'PGLYRP2	Large artery stroke	Inverse variance weighted (multiplicative random effects)	2	-0.0716217	0.0318976	0.0247446	0.408475
7015_8	'LILRB5	Large artery stroke	Inverse variance weighted (multiplicative random effects)	2	-0.0386475	0.0172164	0.024781	0.408475
OID30635	'RIDA	Ischemic stroke	Inverse variance weighted (multiplicative random effects)	23	0.0588735	0.0262496	0.0249075	0.409909
OID31066	'NEO1	Cardioembolic stroke	Inverse variance weighted (multiplicative random effects)	8	0.0295737	0.0131948	0.0250052	0.410867
OID30639	'GIMAP7	Cardioembolic stroke	Inverse variance weighted (multiplicative random effects)	8	0.0437665	0.0195455	0.0251422	0.412468
19115_13	'CMBL	Large artery stroke	Inverse variance weighted (multiplicative random effects)	2	-0.0756046	0.0337969	0.0252846	0.41415
15376_134	'CTSE	Cardioembolic stroke	Inverse variance weighted (multiplicative random effects)	8	-0.0771515	0.0345055	0.0253573	0.414688
OID30783	'TF	Ischemic stroke	Inverse variance weighted (multiplicative random effects)	23	0.0630341	0.0282139	0.0254733	0.415931
9906_21	'SPOCK3	Ischemic stroke	Inverse variance weighted (multiplicative random effects)	22	0.0901567	0.0403979	0.0256336	0.417546
15304_1	'REG3A	Ischemic stroke	Inverse variance weighted (multiplicative random effects)	22	0.0874661	0.0391973	0.0256525	0.417546
9931_20	'KRT1	Large artery stroke	Inverse variance weighted (multiplicative random effects)	2	0.0391879	0.0175754	0.0257668	0.418134
8221_19	'MIF	Cardioembolic stroke	Inverse variance weighted (multiplicative random effects)	8	0.0310221	0.0139168	0.0258065	0.418134
OID20906	'SKAP1	Large artery stroke	Inverse variance weighted (multiplicative random effects)	3	0.0723464	0.0324559	0.0258092	0.418134
17724_3	'WWOX	Cardioembolic stroke	Inverse variance weighted (multiplicative random effects)	8	-0.0272317	0.0122308	0.0259811	0.420086
17410_5	'CETN3	Large artery stroke	Inverse variance weighted (multiplicative random effects)	2	-0.0339225	0.0152388	0.0260105	0.420086
3212_30	'ASAH2	Large artery stroke	Inverse variance weighted (multiplicative random effects)	2	-0.0532614	0.0239475	0.0261424	0.421561
2637_77	'MRC1	Large artery stroke	Inverse variance weighted (multiplicative random effects)	2	-0.0455074	0.0204708	0.0262133	0.421859
5644_60	'RNASE4	Ischemic stroke	Inverse variance weighted (multiplicative random effects)	22	0.0938092	0.0422068	0.026242	0.421859
19130_81	'SERPINB8	Large artery stroke	Inverse variance weighted (multiplicative random effects)	2	0.0576172	0.0259431	0.0263574	0.422722
15480_2	'VNN2	Large artery stroke	Inverse variance weighted (multiplicative random effects)	2	-0.0721757	0.0325102	0.0264123	0.422722
OID30828	'ART5	Large artery stroke	Inverse variance weighted (multiplicative random effects)	3	-0.0573803	0.0258468	0.0264176	0.422722
OID20774	'DAG1	Large artery stroke	Inverse variance weighted (multiplicative random effects)	3	-0.0731945	0.0329795	0.02646	0.42275
OID20639	'FCRL2	Cardioembolic stroke	Inverse variance weighted (multiplicative random effects)	8	0.0433603	0.0195479	0.0265438	0.423369
19482_11	'HDHD3	Large artery stroke	Inverse variance weighted (multiplicative random effects)	2	-0.0147507	0.00665235	0.0265981	0.423369
3640_14	'LRPAP1	Large artery stroke	Inverse variance weighted (multiplicative random effects)	2	-0.0514181	0.0231956	0.026642	0.423369
OID30766	'C7	Ischemic stroke	Inverse variance weighted (multiplicative random effects)	23	0.0898514	0.0405386	0.0266615	0.423369
OID30743	'SERPINA6	Large artery stroke	Inverse variance weighted (multiplicative random effects)	3	-0.0437758	0.0197856	0.0269316	0.427005
OID31116	'CHCHD10	Cardioembolic stroke	Inverse variance weighted (multiplicative random effects)	8	0.0332785	0.0150536	0.0270595	0.42838
17791_25	'HPCAL1	Large artery stroke	Inverse variance weighted (multiplicative random effects)	2	-0.0404597	0.0183412	0.0273874	0.432913
3459_49	'PDGFRB	Cardioembolic stroke	Inverse variance weighted (multiplicative random effects)	8	-0.0234086	0.0106256	0.0275929	0.435226
3327_27	'NTN4	Cardioembolic stroke	Inverse variance weighted (multiplicative random effects)	8	-0.0626966	0.0284638	0.0276174	0.435226
3213_65	'NID1	Ischemic stroke	Inverse variance weighted (multiplicative random effects)	22	0.107694	0.048931	0.027741	0.436511
8398_277	'RARRES1	Ischemic stroke	Inverse variance weighted (multiplicative random effects)	22	0.0737701	0.0335361	0.0278263	0.437193
4155_3	'TNC	Large artery stroke	Inverse variance weighted (multiplicative random effects)	2	0.0580762	0.0264157	0.0279099	0.437845
OID31399	'MINDY1	Large artery stroke	Inverse variance weighted (multiplicative random effects)	3	-0.0343047	0.0156215	0.0280928	0.44005
4978_54	'DBNL	Ischemic stroke	Inverse variance weighted (multiplicative random effects)	22	0.0921082	0.0419757	0.0282121	0.441255
10908_2	'GALNT13	Large artery stroke	Inverse variance weighted (multiplicative random effects)	2	-0.00534452	0.00243794	0.028363	0.442949
18839_24	'TG	Cardioembolic stroke	Inverse variance weighted (multiplicative random effects)	8	0.0408083	0.0186467	0.0286335	0.446502
12594_5	'GCA	Ischemic stroke	Inverse variance weighted (multiplicative random effects)	22	0.0576914	0.0264464	0.0291503	0.451017
5867_60	'ARG1	Large artery stroke	Inverse variance weighted (multiplicative random effects)	2	-0.0537714	0.0246565	0.0291968	0.451017
8080_24	'MSMP	Ischemic stroke	Inverse variance weighted (multiplicative random effects)	22	0.111128	0.0509613	0.0292098	0.451017
OID30789	'SERPINC1	Large artery stroke	Inverse variance weighted (multiplicative random effects)	3	-0.0668169	0.0306507	0.0292613	0.451017
OID20543	'PROK1	Large artery stroke	Inverse variance weighted (multiplicative random effects)	3	-0.0415624	0.0190665	0.0292677	0.451017
OID30702	'FGL1	Ischemic stroke	Inverse variance weighted (multiplicative random effects)	23	0.0509551	0.0233769	0.0292783	0.451017
4407_10	'MST1	Cardioembolic stroke	Inverse variance weighted (multiplicative random effects)	8	0.0220258	0.0101049	0.0292786	0.451017
5632_6	'CRTAC1	Cardioembolic stroke	Inverse variance weighted (multiplicative random effects)	8	0.0439604	0.0201688	0.0292854	0.451017
6521_35	'NPTX2	Large artery stroke	Inverse variance weighted (multiplicative random effects)	2	-0.0774224	0.0355271	0.0293133	0.451017
OID30701	'APOF	Large artery stroke	Inverse variance weighted (multiplicative random effects)	3	-0.0532533	0.0244584	0.0294582	0.452419
OID20358	'CTSD	Large artery stroke	Inverse variance weighted (multiplicative random effects)	3	-0.0805073	0.0370124	0.0296195	0.452419
5601_2	'PGLYRP2	Ischemic stroke	Inverse variance weighted (multiplicative random effects)	22	0.0893136	0.0410869	0.029722	0.452419
6620_82	'LINGO1	Large artery stroke	Inverse variance weighted (multiplicative random effects)	2	-0.0314496	0.0144693	0.0297398	0.452419
OID30343	'PTPRZ1	Large artery stroke	Inverse variance weighted (multiplicative random effects)	3	-0.125616	0.0578011	0.0297622	0.452419
OID30109	'GASK1A	Ischemic stroke	Inverse variance weighted (multiplicative random effects)	23	-0.0716486	0.0329784	0.0298109	0.452419
15509_2	'NAGLU	Cardioembolic stroke	Inverse variance weighted (multiplicative random effects)	8	-0.0338297	0.0155719	0.0298195	0.452419
OID30677	'LCAT	Ischemic stroke	Inverse variance weighted (multiplicative random effects)	23	0.0671466	0.0309104	0.029833	0.452419
OID20847	'PTS	Large artery stroke	Inverse variance weighted (multiplicative random effects)	3	0.112541	0.0518103	0.0298429	0.452419
2816_50	'BCAM	Large artery stroke	Inverse variance weighted (multiplicative random effects)	2	-0.0183066	0.00842944	0.029875	0.452419
12556_7	'UBE2C	Large artery stroke	Inverse variance weighted (multiplicative random effects)	2	-0.0865086	0.0398356	0.0298829	0.452419
OID20258	'REG3A	Cardioembolic stroke	Inverse variance weighted (multiplicative random effects)	8	0.02336	0.0107891	0.0303757	0.459211
OID21080	'CD164	Large artery stroke	Inverse variance weighted (multiplicative random effects)	3	-0.0372271	0.0172115	0.0305475	0.461138
2609_59	'CST3	Large artery stroke	Inverse variance weighted (multiplicative random effects)	2	0.0636228	0.0294268	0.0306128	0.461454
9545_156	'GZMK	Ischemic stroke	Inverse variance weighted (multiplicative random effects)	22	0.149273	0.0690694	0.0306797	0.461794
15427_35	'LOXL3	Ischemic stroke	Inverse variance weighted (multiplicative random effects)	22	0.102503	0.0474476	0.030747	0.461855
10558_26	'PCDH9	Ischemic stroke	Inverse variance weighted (multiplicative random effects)	22	0.128499	0.0594901	0.0307726	0.461855
OID21431	'CAPG	Large artery stroke	Inverse variance weighted (multiplicative random effects)	3	0.0240041	0.0111169	0.030832	0.462081
11377_19	'ADH7	Cardioembolic stroke	Inverse variance weighted (multiplicative random effects)	8	-0.0494952	0.0229432	0.0309828	0.463672
OID20381	'GP1BA	Large artery stroke	Inverse variance weighted (multiplicative random effects)	3	0.0774525	0.0359226	0.0310764	0.464405
OID30679	'ASGR2	Cardioembolic stroke	Inverse variance weighted (multiplicative random effects)	8	0.0323254	0.0150071	0.0312393	0.466169
OID31443	'CEACAM19	Cardioembolic stroke	Inverse variance weighted (multiplicative random effects)	8	0.0482792	0.0224213	0.0312972	0.466364
OID31027	'RNASEH2A	Large artery stroke	Inverse variance weighted (multiplicative random effects)	3	-0.0794246	0.0369024	0.0313746	0.466849
OID30403	'CHGA	Cardioembolic stroke	Inverse variance weighted (multiplicative random effects)	8	-0.053825	0.0250389	0.0315826	0.469272
OID21457	'GFRA1	Large artery stroke	Inverse variance weighted (multiplicative random effects)	3	0.0716476	0.0333405	0.0316371	0.469411
OID20660	'CTSO	Cardioembolic stroke	Inverse variance weighted (multiplicative random effects)	8	0.0266483	0.012408	0.0317407	0.470278
3310_62	'FCGR2B	Large artery stroke	Inverse variance weighted (multiplicative random effects)	2	-0.043914	0.0204658	0.0318948	0.471889
OID30971	'TEX101	Ischemic stroke	Inverse variance weighted (multiplicative random effects)	23	0.0553733	0.0258142	0.0319469	0.471989
OID20185	'LRP11	Ischemic stroke	Inverse variance weighted (multiplicative random effects)	23	-0.09627	0.0449394	0.0321758	0.474695
OID20975	'HNMT	Cardioembolic stroke	Inverse variance weighted (multiplicative random effects)	8	0.0288519	0.0134739	0.0322485	0.475094
OID20075	'CA5A	Cardioembolic stroke	Inverse variance weighted (multiplicative random effects)	8	0.0330575	0.0154441	0.0323181	0.475137
OID20508	'SULT2A1	Large artery stroke	Inverse variance weighted (multiplicative random effects)	3	-0.0611056	0.028552	0.0323428	0.475137
5483_1	'RGMA	Large artery stroke	Inverse variance weighted (multiplicative random effects)	2	-0.0912794	0.0426784	0.0324542	0.476101
OID21285	'TACC3	Large artery stroke	Inverse variance weighted (multiplicative random effects)	3	-0.0296146	0.0138621	0.0326487	0.47826
13682_47	'CSF1R	Ischemic stroke	Inverse variance weighted (multiplicative random effects)	22	0.217068	0.101632	0.0326933	0.47826
OID20767	'MATN2	Large artery stroke	Inverse variance weighted (multiplicative random effects)	3	0.0861821	0.0404042	0.0329251	0.480974
OID30395	'FGFBP2	Cardioembolic stroke	Inverse variance weighted (multiplicative random effects)	8	0.0359349	0.016857	0.0330274	0.481793
OID21006	'CNTN5	Large artery stroke	Inverse variance weighted (multiplicative random effects)	3	-0.0832569	0.039086	0.0331637	0.483104
OID20223	'CHRDL2	Large artery stroke	Inverse variance weighted (multiplicative random effects)	3	0.0902111	0.042369	0.0332397	0.483533
OID30281	'B3GNT7	Cardioembolic stroke	Inverse variance weighted (multiplicative random effects)	8	0.0585683	0.0275581	0.0335642	0.487572
OID20444	'PRKAB1	Large artery stroke	Inverse variance weighted (multiplicative random effects)	3	-0.0300413	0.0141432	0.033663	0.488236
3448_13	'INSR	Large artery stroke	Inverse variance weighted (multiplicative random effects)	2	-0.0394615	0.0185824	0.0337038	0.488236
OID20658	'AGRP	Ischemic stroke	Inverse variance weighted (multiplicative random effects)	23	0.106825	0.0503567	0.0338905	0.490258
14133_93	'IL1R2	Ischemic stroke	Inverse variance weighted (multiplicative random effects)	22	0.116917	0.0551386	0.0339709	0.490739
OID30217	'COQ7	Ischemic stroke	Inverse variance weighted (multiplicative random effects)	23	0.0782071	0.0369193	0.0341475	0.492605
OID20998	'BCAN	Ischemic stroke	Inverse variance weighted (multiplicative random effects)	23	-0.110912	0.0523842	0.0342353	0.493187
OID31047	'ALDH5A1	Ischemic stroke	Inverse variance weighted (multiplicative random effects)	23	0.0830687	0.0392529	0.0343241	0.493783
9416_77	'CPM	Ischemic stroke	Inverse variance weighted (multiplicative random effects)	22	0.0859014	0.0406131	0.0344203	0.494482
7761_125	'CHKB	Large artery stroke	Inverse variance weighted (multiplicative random effects)	2	-0.112471	0.0532097	0.0345385	0.495046
17782_23	'ACAA1	Ischemic stroke	Inverse variance weighted (multiplicative random effects)	22	0.0725265	0.0343152	0.0345547	0.495046
OID20630	'SERPINB8	Cardioembolic stroke	Inverse variance weighted (multiplicative random effects)	8	0.0217423	0.0103092	0.0349437	0.49993
2681_23	'HGF	Large artery stroke	Inverse variance weighted (multiplicative random effects)	2	-0.0290452	0.0137784	0.0350296	0.500471
5637_81	'NTNG1	Large artery stroke	Inverse variance weighted (multiplicative random effects)	2	-0.0177269	0.00841387	0.0351291	0.501205
17737_7	'IVD	Ischemic stroke	Inverse variance weighted (multiplicative random effects)	22	0.0714544	0.0340227	0.0357111	0.50881
OID31429	'TRIM58	Cardioembolic stroke	Inverse variance weighted (multiplicative random effects)	8	0.0577357	0.0275266	0.0359541	0.511571
2201_17	'COL18A1	Large artery stroke	Inverse variance weighted (multiplicative random effects)	2	0.057278	0.0273246	0.0360635	0.512427
3171_57	'APP	Ischemic stroke	Inverse variance weighted (multiplicative random effects)	22	0.092574	0.0442597	0.0364737	0.516613
18432_32	'RALB	Large artery stroke	Inverse variance weighted (multiplicative random effects)	2	-0.0672577	0.0321567	0.0364778	0.516613
OID30787	'FN1	Cardioembolic stroke	Inverse variance weighted (multiplicative random effects)	8	-0.0551375	0.026366	0.0365071	0.516613
OID30639	'GIMAP7	Ischemic stroke	Inverse variance weighted (multiplicative random effects)	23	0.10345	0.0494981	0.0366192	0.517495
3007_7	'SIGLEC9	Large artery stroke	Inverse variance weighted (multiplicative random effects)	2	-0.0212951	0.0101938	0.0367047	0.518
13519_112	'ARHGEF25	Large artery stroke	Inverse variance weighted (multiplicative random effects)	2	-0.0425525	0.0203833	0.036833	0.518951
9876_20	'ALDOC	Ischemic stroke	Inverse variance weighted (multiplicative random effects)	22	0.0883604	0.0423401	0.0368953	0.518951
6930_95	'ST8SIA6	Large artery stroke	Inverse variance weighted (multiplicative random effects)	2	-0.0251571	0.0120563	0.0369218	0.518951
OID20477	'IL17C	Ischemic stroke	Inverse variance weighted (multiplicative random effects)	23	-0.0553977	0.0265664	0.0370459	0.519992
OID21279	'SEPTIN9	Ischemic stroke	Inverse variance weighted (multiplicative random effects)	23	0.0693572	0.03327	0.0370985	0.520029
5687_5	'PRKCSH	Ischemic stroke	Inverse variance weighted (multiplicative random effects)	22	0.076818	0.0368767	0.0372416	0.520881
14047_78	'BDNF	Ischemic stroke	Inverse variance weighted (multiplicative random effects)	22	0.0830781	0.0398856	0.0372594	0.520881
10722_13	'SYK	Large artery stroke	Inverse variance weighted (multiplicative random effects)	2	-0.0503392	0.0241832	0.037381	0.521188
14747_9	'CRLF1	Cardioembolic stroke	Inverse variance weighted (multiplicative random effects)	8	-0.0288402	0.013855	0.0373816	0.521188
OID30968	'SEZ6	Cardioembolic stroke	Inverse variance weighted (multiplicative random effects)	8	0.0278926	0.0134163	0.0376176	0.522644
13438_115	'CHRD	Cardioembolic stroke	Inverse variance weighted (multiplicative random effects)	8	0.0265548	0.0127729	0.0376186	0.522644
OID20778	'FABP1	Cardioembolic stroke	Inverse variance weighted (multiplicative random effects)	8	0.0417207	0.0200794	0.037729	0.522644
15387_44	'NRP2	Ischemic stroke	Inverse variance weighted (multiplicative random effects)	22	0.0790603	0.0380562	0.0377588	0.522644
OID31110	'PLB1	Large artery stroke	Inverse variance weighted (multiplicative random effects)	3	0.0555647	0.0267496	0.0377817	0.522644
2948_58	'GHR	Large artery stroke	Inverse variance weighted (multiplicative random effects)	2	-0.0803196	0.0386681	0.0377876	0.522644
OID20622	'CXCL17	Large artery stroke	Inverse variance weighted (multiplicative random effects)	3	-0.136539	0.0658819	0.038221	0.527371
4464_10	'SIGLEC1	Ischemic stroke	Inverse variance weighted (multiplicative random effects)	22	0.0892476	0.0430654	0.0382308	0.527371
3403_1	'TPSB2	Large artery stroke	Inverse variance weighted (multiplicative random effects)	2	-0.0323329	0.0156288	0.0385644	0.531269
OID30509	'NAGA	Cardioembolic stroke	Inverse variance weighted (multiplicative random effects)	8	0.0393692	0.0190547	0.0388178	0.534053
15494_11	'FGFBP1	Large artery stroke	Inverse variance weighted (multiplicative random effects)	2	-0.073651	0.0357266	0.0392536	0.538642
7921_65	'FJX1	Large artery stroke	Inverse variance weighted (multiplicative random effects)	2	0.040064	0.0194343	0.039255	0.538642
17161_1	'DDOST	Ischemic stroke	Inverse variance weighted (multiplicative random effects)	22	0.082173	0.0399138	0.0395171	0.541525
OID21294	'ADGRG1	Large artery stroke	Inverse variance weighted (multiplicative random effects)	3	-0.155251	0.0754653	0.0396623	0.5428
OID20464	'CXCL12	Large artery stroke	Inverse variance weighted (multiplicative random effects)	3	-0.0872073	0.0424153	0.0397792	0.543684
OID21442	'FXN	Large artery stroke	Inverse variance weighted (multiplicative random effects)	3	-0.0389738	0.0190017	0.0402601	0.549534
OID20904	'MAD1L1	Cardioembolic stroke	Inverse variance weighted (multiplicative random effects)	8	0.0320426	0.0156375	0.0404539	0.551456
OID20258	'REG3A	Ischemic stroke	Inverse variance weighted (multiplicative random effects)	23	0.0870477	0.042501	0.0405471	0.552003
OID30263	'ANXA2	Cardioembolic stroke	Inverse variance weighted (multiplicative random effects)	8	0.0348803	0.0170491	0.040769	0.554298
15535_3	'PRSS27	Cardioembolic stroke	Inverse variance weighted (multiplicative random effects)	8	-0.0532173	0.0260244	0.040865	0.554879
5452_71	'ASGR1	Large artery stroke	Inverse variance weighted (multiplicative random effects)	2	0.0586041	0.0286797	0.0410126	0.556156
16614_27	'RSPO1	Ischemic stroke	Inverse variance weighted (multiplicative random effects)	22	0.114452	0.056045	0.0411363	0.557025
OID21315	'LAG3	Cardioembolic stroke	Inverse variance weighted (multiplicative random effects)	8	0.0310703	0.0152208	0.0412206	0.557025
12329_21	'RPS6KA1	Large artery stroke	Inverse variance weighted (multiplicative random effects)	2	-0.0458161	0.0224464	0.0412373	0.557025
8351_17	'PRSS57	Cardioembolic stroke	Inverse variance weighted (multiplicative random effects)	8	-0.0357838	0.0175366	0.0412984	0.557126
8346_9	'DPP7	Large artery stroke	Inverse variance weighted (multiplicative random effects)	2	-0.0526005	0.0257991	0.0414651	0.558106
18337_4	'GMDS	Cardioembolic stroke	Inverse variance weighted (multiplicative random effects)	8	-0.0385412	0.0189071	0.0415046	0.558106
OID20163	'PDCD6	Large artery stroke	Inverse variance weighted (multiplicative random effects)	3	-0.0248008	0.0121681	0.041532	0.558106
8337_65	'PTPRU	Cardioembolic stroke	Inverse variance weighted (multiplicative random effects)	8	-0.0509491	0.0250754	0.0421706	0.565957
OID30704	'PON1	Cardioembolic stroke	Inverse variance weighted (multiplicative random effects)	8	0.0243548	0.012002	0.0424358	0.568782
2774_10	'IL16	Ischemic stroke	Inverse variance weighted (multiplicative random effects)	22	0.0727063	0.0358988	0.0428353	0.572931
OID21381	'VMO1	Ischemic stroke	Inverse variance weighted (multiplicative random effects)	23	0.0606403	0.0299441	0.0428555	0.572931
8778_3	'NOG	Ischemic stroke	Inverse variance weighted (multiplicative random effects)	22	0.0884694	0.0437425	0.0431244	0.575786
OID20869	'XRCC4	Large artery stroke	Inverse variance weighted (multiplicative random effects)	3	-0.0316789	0.0156713	0.0432321	0.576484
7185_29	'GP5	Ischemic stroke	Inverse variance weighted (multiplicative random effects)	22	0.0968018	0.0479545	0.0435269	0.57873
10916_44	'PLA2R1	Large artery stroke	Inverse variance weighted (multiplicative random effects)	2	-0.0199261	0.00987599	0.0436294	0.57873
OID30313	'MYDGF	Large artery stroke	Inverse variance weighted (multiplicative random effects)	3	-0.0405838	0.0201158	0.0436428	0.57873
10605_22	'APMAP	Large artery stroke	Inverse variance weighted (multiplicative random effects)	2	-0.0380322	0.0188517	0.0436492	0.57873
OID31097	'GSTT2B	Ischemic stroke	Inverse variance weighted (multiplicative random effects)	23	0.0469246	0.0232627	0.0436788	0.57873
OID30706	'AHSG	Cardioembolic stroke	Inverse variance weighted (multiplicative random effects)	8	0.0428241	0.0212711	0.0440877	0.582961
OID20933	'GFRA3	Large artery stroke	Inverse variance weighted (multiplicative random effects)	3	-0.1741	0.0864859	0.0441102	0.582961
OID30662	'SDK2	Ischemic stroke	Inverse variance weighted (multiplicative random effects)	23	0.126176	0.0627027	0.0441897	0.583271
9015_1	'PRG3	Ischemic stroke	Inverse variance weighted (multiplicative random effects)	22	0.172021	0.0855615	0.044379	0.585026
9986_14	'NPW	Ischemic stroke	Inverse variance weighted (multiplicative random effects)	22	0.0921129	0.045883	0.0446898	0.588379
OID20103	'S100P	Large artery stroke	Inverse variance weighted (multiplicative random effects)	3	0.0937973	0.0467375	0.044761	0.58857
OID31460	'EFCAB14	Cardioembolic stroke	Inverse variance weighted (multiplicative random effects)	8	0.0328978	0.016398	0.0448346	0.588794
OID20628	'CD244	Cardioembolic stroke	Inverse variance weighted (multiplicative random effects)	8	0.0298761	0.0148995	0.0449439	0.589484
14158_17	'ANXA5	Cardioembolic stroke	Inverse variance weighted (multiplicative random effects)	8	0.0188775	0.00942625	0.0452151	0.592295
2515_14	'GFRA2	Ischemic stroke	Inverse variance weighted (multiplicative random effects)	22	0.111531	0.0557254	0.0453448	0.593247
OID31091	'GFRAL	Ischemic stroke	Inverse variance weighted (multiplicative random effects)	23	-0.214272	0.107203	0.0456351	0.596295
OID21392	'CPE	Ischemic stroke	Inverse variance weighted (multiplicative random effects)	23	-0.189702	0.0949747	0.0457819	0.596924
4500_50	'CLEC11A	Ischemic stroke	Inverse variance weighted (multiplicative random effects)	22	0.119023	0.0595954	0.0458045	0.596924
7648_9	'MYBPC1	Ischemic stroke	Inverse variance weighted (multiplicative random effects)	22	-0.0636246	0.0318645	0.0458554	0.596924
OID21146	'IGF2R	Ischemic stroke	Inverse variance weighted (multiplicative random effects)	23	-0.0677659	0.0339556	0.0459639	0.597589
13983_27	'CRYZ	Ischemic stroke	Inverse variance weighted (multiplicative random effects)	22	0.0469285	0.0235228	0.0460406	0.597795
OID30453	'RPA2	Large artery stroke	Inverse variance weighted (multiplicative random effects)	3	-0.0606628	0.0304192	0.0461272	0.597795
OID20966	'CD274	Large artery stroke	Inverse variance weighted (multiplicative random effects)	3	-0.0946544	0.0474697	0.0461523	0.597795
OID20359	'TNC	Large artery stroke	Inverse variance weighted (multiplicative random effects)	3	0.16556	0.0831266	0.0464084	0.600366
OID20089	'ADAMTS16	Ischemic stroke	Inverse variance weighted (multiplicative random effects)	23	-0.0748741	0.0376134	0.0465224	0.601092
OID30705	'RNASE4	Cardioembolic stroke	Inverse variance weighted (multiplicative random effects)	8	0.031641	0.0159178	0.0468366	0.604401
OID20731	'TREM2	Cardioembolic stroke	Inverse variance weighted (multiplicative random effects)	8	0.0425349	0.0214082	0.0469387	0.604969
17384_110	'PFKM	Large artery stroke	Inverse variance weighted (multiplicative random effects)	2	-0.0885586	0.0446059	0.0471046	0.605806
16919_1	'DBI	Large artery stroke	Inverse variance weighted (multiplicative random effects)	2	-0.043034	0.0216772	0.0471202	0.605806
OID20458	'CXCL14	Cardioembolic stroke	Inverse variance weighted (multiplicative random effects)	8	-0.0193943	0.00977538	0.0472564	0.606049
15602_43	'IL6R	Ischemic stroke	Inverse variance weighted (multiplicative random effects)	22	0.142177	0.071664	0.0472633	0.606049
OID20948	'SETMAR	Ischemic stroke	Inverse variance weighted (multiplicative random effects)	23	0.0756035	0.0381166	0.0473139	0.606049
OID30329	'NPL	Ischemic stroke	Inverse variance weighted (multiplicative random effects)	23	0.0806897	0.0407356	0.0476119	0.609116
10772_21	'CSGALNACT2	Cardioembolic stroke	Inverse variance weighted (multiplicative random effects)	8	0.0512583	0.0259032	0.0478335	0.6112
OID31156	'MINK1	Large artery stroke	Inverse variance weighted (multiplicative random effects)	3	-0.0280184	0.0141645	0.0479208	0.611359
5112_73	'CD200	Large artery stroke	Inverse variance weighted (multiplicative random effects)	2	-0.0566897	0.0286646	0.0479635	0.611359
OID20214	'SFTPD	Ischemic stroke	Inverse variance weighted (multiplicative random effects)	23	0.0721922	0.036576	0.048409	0.616282
2681_23	'HGF	Ischemic stroke	Inverse variance weighted (multiplicative random effects)	22	0.10121	0.0513242	0.0486134	0.618127
OID20705	'ERBB3	Large artery stroke	Inverse variance weighted (multiplicative random effects)	3	-0.0452708	0.0229776	0.048814	0.61992
3283_21	'TGFBI	Ischemic stroke	Inverse variance weighted (multiplicative random effects)	22	0.0846563	0.042998	0.0489708	0.620675
3311_27	'FCGR3B	Cardioembolic stroke	Inverse variance weighted (multiplicative random effects)	8	0.048471	0.0246214	0.0489928	0.620675
OID31082	'KLRK1	Large artery stroke	Inverse variance weighted (multiplicative random effects)	3	-0.0525615	0.0267586	0.0494973	0.626303
9883_29	'GLO1	Large artery stroke	Inverse variance weighted (multiplicative random effects)	2	-0.0433964	0.0221019	0.0495914	0.626637
OID30592	'HMCN2	Large artery stroke	Inverse variance weighted (multiplicative random effects)	3	0.0588	0.0299539	0.0496441	0.626637
3331_8	'RGMB	Ischemic stroke	Inverse variance weighted (multiplicative random effects)	22	0.0911396	0.0464422	0.0497124	0.626738
OID20063	'HEBP1	Ischemic stroke	Inverse variance weighted (multiplicative random effects)	23	-0.0580696	0.0296	0.0497849	0.626893
4546_27	'ADGRE2	Cardioembolic stroke	Inverse variance weighted (multiplicative random effects)	8	-0.0395101	0.0201474	0.049873	0.627241
5121_3	'SEMA6B	Ischemic stroke	Inverse variance weighted (multiplicative random effects)	22	0.142386	0.0726714	0.0500761	0.628651
2201_17	'COL18A1	Ischemic stroke	Inverse variance weighted (multiplicative random effects)	22	0.0907342	0.0463152	0.0501059	0.628651
OID31351	'AMOTL2	Cardioembolic stroke	Inverse variance weighted (multiplicative random effects)	8	0.040052	0.02048	0.050505	0.632895
OID31437	'GPHA2	Ischemic stroke	Inverse variance weighted (multiplicative random effects)	23	-0.0872007	0.044612	0.0506246	0.63363
7208_60	'MGAT4C	Cardioembolic stroke	Inverse variance weighted (multiplicative random effects)	8	0.0220382	0.0113032	0.0512075	0.640051
OID20204	'SOST	Ischemic stroke	Inverse variance weighted (multiplicative random effects)	23	-0.0811336	0.0416263	0.051284	0.640051
OID31479	'CWC15	Large artery stroke	Inverse variance weighted (multiplicative random effects)	3	-0.0734538	0.0376923	0.0513222	0.640051
4969_2	'CA1	Large artery stroke	Inverse variance weighted (multiplicative random effects)	2	-0.0411849	0.021151	0.0515119	0.641648
13940_19	'IFI16	Ischemic stroke	Inverse variance weighted (multiplicative random effects)	22	0.092862	0.0477049	0.0515835	0.641771
OID30346	'LILRA6	Cardioembolic stroke	Inverse variance weighted (multiplicative random effects)	8	0.0364543	0.0187358	0.0516905	0.642333
OID20540	'BTN3A2	Large artery stroke	Inverse variance weighted (multiplicative random effects)	3	-0.0440993	0.0226977	0.052029	0.645768
OID30677	'LCAT	Cardioembolic stroke	Inverse variance weighted (multiplicative random effects)	8	0.0299432	0.0154189	0.0521398	0.646372
7648_9	'MYBPC1	Large artery stroke	Inverse variance weighted (multiplicative random effects)	2	-0.0176847	0.00910914	0.0522071	0.646436
OID20195	'GLRX	Cardioembolic stroke	Inverse variance weighted (multiplicative random effects)	8	0.0255677	0.0131893	0.0525608	0.650041
OID20191	'NPTXR	Ischemic stroke	Inverse variance weighted (multiplicative random effects)	23	-0.090766	0.0469001	0.0529531	0.654045
3440_7	'GZMA	Cardioembolic stroke	Inverse variance weighted (multiplicative random effects)	8	-0.0219012	0.0113245	0.0531162	0.654045
OID30705	'RNASE4	Large artery stroke	Inverse variance weighted (multiplicative random effects)	3	-0.0224021	0.0115867	0.0531825	0.654045
OID30293	'ECHDC3	Cardioembolic stroke	Inverse variance weighted (multiplicative random effects)	8	0.0320603	0.0165864	0.0532449	0.654045
17333_20	'ACADM	Ischemic stroke	Inverse variance weighted (multiplicative random effects)	22	0.0682604	0.0353409	0.0534233	0.654045
OID20175	'GHRL	Large artery stroke	Inverse variance weighted (multiplicative random effects)	3	-0.168716	0.0873546	0.0534345	0.654045
OID30087	'NOS2	Large artery stroke	Inverse variance weighted (multiplicative random effects)	3	-0.056035	0.0290361	0.0536272	0.654045
OID20512	'ALDH3A1	Cardioembolic stroke	Inverse variance weighted (multiplicative random effects)	8	0.0179166	0.0092853	0.0536613	0.654045
OID20336	'BLMH	Cardioembolic stroke	Inverse variance weighted (multiplicative random effects)	8	0.0440729	0.0228428	0.0536811	0.654045
19437_61	'VEGFA	Ischemic stroke	Inverse variance weighted (multiplicative random effects)	22	0.0902291	0.046771	0.0537102	0.654045
3040_59	'CCL3	Large artery stroke	Inverse variance weighted (multiplicative random effects)	2	-0.0574849	0.0297982	0.0537138	0.654045
OID20739	'SIRPB1	Cardioembolic stroke	Inverse variance weighted (multiplicative random effects)	8	0.0281314	0.014584	0.0537408	0.654045
19241_31	'RBP5	Ischemic stroke	Inverse variance weighted (multiplicative random effects)	22	0.129503	0.0671434	0.0537607	0.654045
OID31374	'SNX2	Cardioembolic stroke	Inverse variance weighted (multiplicative random effects)	8	0.0345065	0.0178908	0.0537648	0.654045
15435_4	'PNP	Large artery stroke	Inverse variance weighted (multiplicative random effects)	2	-0.0909507	0.047238	0.0541831	0.657128
15386_7	'FABP4	Large artery stroke	Inverse variance weighted (multiplicative random effects)	2	0.0651221	0.0338259	0.0542027	0.657128
11145_72	'KIAA1549L	Large artery stroke	Inverse variance weighted (multiplicative random effects)	2	-0.0269863	0.0140176	0.0542078	0.657128
OID20489	'GBP2	Large artery stroke	Inverse variance weighted (multiplicative random effects)	3	-0.0573552	0.02982	0.0544325	0.65803
OID30890	'CLIC5	Cardioembolic stroke	Inverse variance weighted (multiplicative random effects)	8	0.0458666	0.0238538	0.0545028	0.65803
OID20079	'ACTA2	Ischemic stroke	Inverse variance weighted (multiplicative random effects)	23	-0.0603764	0.0314017	0.0545161	0.65803
8778_3	'NOG	Large artery stroke	Inverse variance weighted (multiplicative random effects)	2	-0.03973	0.0206652	0.0545354	0.65803
OID20638	'LAMP3	Large artery stroke	Inverse variance weighted (multiplicative random effects)	3	-0.0963016	0.0501613	0.0548783	0.661401
OID20149	'PM20D1	Cardioembolic stroke	Inverse variance weighted (multiplicative random effects)	8	-0.0464017	0.0241801	0.0549842	0.661774
15480_2	'VNN2	Cardioembolic stroke	Inverse variance weighted (multiplicative random effects)	8	-0.0355905	0.0185503	0.0550365	0.661774
13130_150	'HK2	Large artery stroke	Inverse variance weighted (multiplicative random effects)	2	-0.0222204	0.0115901	0.0552137	0.663138
19213_1	'SPINK4	Cardioembolic stroke	Inverse variance weighted (multiplicative random effects)	8	0.0335638	0.0175168	0.0553537	0.664053
18864_7	'PRSS3	Ischemic stroke	Inverse variance weighted (multiplicative random effects)	22	0.108504	0.0567178	0.0557428	0.666768
OID20976	'CX3CL1	Ischemic stroke	Inverse variance weighted (multiplicative random effects)	23	-0.168301	0.0879955	0.055798	0.666768
3449_58	'SERPINA4	Large artery stroke	Inverse variance weighted (multiplicative random effects)	2	-0.0443476	0.0231883	0.0558118	0.666768
OID31480	'CD101	Ischemic stroke	Inverse variance weighted (multiplicative random effects)	23	0.117818	0.0616102	0.0558364	0.666768
11219_95	'FGFBP3	Ischemic stroke	Inverse variance weighted (multiplicative random effects)	22	0.0894496	0.0468297	0.0561199	0.669384
15316_262	'TXNL4B	Large artery stroke	Inverse variance weighted (multiplicative random effects)	2	-0.0654227	0.0342668	0.0562342	0.669419
OID21134	'MFGE8	Ischemic stroke	Inverse variance weighted (multiplicative random effects)	23	0.062559	0.0327692	0.0562515	0.669419
OID20245	'FABP4	Cardioembolic stroke	Inverse variance weighted (multiplicative random effects)	8	0.0422542	0.0221438	0.0563695	0.669806
OID30618	'C1QTNF5	Large artery stroke	Inverse variance weighted (multiplicative random effects)	3	0.0140875	0.00738522	0.0564522	0.669806
7206_20	'FBP1	Large artery stroke	Inverse variance weighted (multiplicative random effects)	2	0.0331992	0.0174061	0.0564772	0.669806
OID20877	'MAX	Large artery stroke	Inverse variance weighted (multiplicative random effects)	3	-0.0710232	0.0372608	0.0566357	0.670921
5480_49	'CCL5	Ischemic stroke	Inverse variance weighted (multiplicative random effects)	22	0.0852753	0.044757	0.0567415	0.671304
4568_17	'SLITRK5	Cardioembolic stroke	Inverse variance weighted (multiplicative random effects)	8	-0.050174	0.026346	0.0568548	0.671304
16913_8	'RNASET2	Cardioembolic stroke	Inverse variance weighted (multiplicative random effects)	8	-0.0357877	0.0187924	0.0568617	0.671304
7145_1	'ITIH3	Large artery stroke	Inverse variance weighted (multiplicative random effects)	2	0.0498807	0.0262008	0.0569382	0.671444
8394_56	'RNASE2	Ischemic stroke	Inverse variance weighted (multiplicative random effects)	22	0.0761564	0.0400331	0.0571275	0.671854
OID21030	'CCL19	Large artery stroke	Inverse variance weighted (multiplicative random effects)	3	0.051729	0.0272068	0.057259	0.671854
OID20347	'CNDP1	Large artery stroke	Inverse variance weighted (multiplicative random effects)	3	-0.0755937	0.0397596	0.0572665	0.671854
9638_2	'TIGIT	Ischemic stroke	Inverse variance weighted (multiplicative random effects)	22	0.0937978	0.0493536	0.0573639	0.671854
OID30381	'PRG2	Cardioembolic stroke	Inverse variance weighted (multiplicative random effects)	8	0.0437846	0.0230381	0.0573642	0.671854
17447_52	'SFRP4	Cardioembolic stroke	Inverse variance weighted (multiplicative random effects)	8	-0.0328306	0.0172838	0.0574977	0.671854
5508_62	'CTSD	Ischemic stroke	Inverse variance weighted (multiplicative random effects)	22	0.089573	0.0471738	0.0575921	0.671854
8427_118	'RSPO3	Cardioembolic stroke	Inverse variance weighted (multiplicative random effects)	8	-0.0214512	0.011304	0.0577407	0.671854
6415_90	'CPN2	Large artery stroke	Inverse variance weighted (multiplicative random effects)	2	-0.0525845	0.0277118	0.057756	0.671854
2973_15	'CD36	Large artery stroke	Inverse variance weighted (multiplicative random effects)	2	-0.0311684	0.0164269	0.0577755	0.671854
OID30925	'DYNLT1	Cardioembolic stroke	Inverse variance weighted (multiplicative random effects)	8	0.0395187	0.0208321	0.0578266	0.671854
OID30964	'UROS	Cardioembolic stroke	Inverse variance weighted (multiplicative random effects)	8	0.025802	0.0136026	0.0578487	0.671854
2692_74	'PLA2G2A	Ischemic stroke	Inverse variance weighted (multiplicative random effects)	22	0.0772691	0.0407363	0.0578527	0.671854
9870_17	'WARS	Ischemic stroke	Inverse variance weighted (multiplicative random effects)	22	0.134214	0.070776	0.0579171	0.671854
OID20982	'EPHB6	Cardioembolic stroke	Inverse variance weighted (multiplicative random effects)	8	0.0327891	0.0172926	0.0579418	0.671854
3495_15	'CXCL6	Ischemic stroke	Inverse variance weighted (multiplicative random effects)	22	0.127349	0.067267	0.0583339	0.674765
OID20487	'IL1RL2	Ischemic stroke	Inverse variance weighted (multiplicative random effects)	23	-0.0696939	0.0368131	0.0583342	0.674765
OID21057	'NTRK3	Ischemic stroke	Inverse variance weighted (multiplicative random effects)	23	-0.146152	0.0772379	0.0584603	0.674765
OID20142	'DPP7	Cardioembolic stroke	Inverse variance weighted (multiplicative random effects)	8	0.0302444	0.015985	0.0584837	0.674765
14655_1	'DNAJC17	Large artery stroke	Inverse variance weighted (multiplicative random effects)	2	-0.0205296	0.0108526	0.0585339	0.674765
OID20255	'TGFBR3	Ischemic stroke	Inverse variance weighted (multiplicative random effects)	23	-0.0955602	0.0505258	0.0585822	0.674765
OID30744	'C5	Large artery stroke	Inverse variance weighted (multiplicative random effects)	3	-0.0191898	0.0101522	0.0587308	0.675729
8080_24	'MSMP	Cardioembolic stroke	Inverse variance weighted (multiplicative random effects)	8	0.0403862	0.0213798	0.058893	0.676109
OID20947	'TMPRSS5	Large artery stroke	Inverse variance weighted (multiplicative random effects)	3	-0.0561761	0.0297388	0.0588938	0.676109
OID31385	'ACRBP	Large artery stroke	Inverse variance weighted (multiplicative random effects)	3	-0.0891929	0.047248	0.059058	0.677247
4141_79	'CXCL10	Ischemic stroke	Inverse variance weighted (multiplicative random effects)	22	0.16991	0.0901033	0.0593317	0.679636
13534_20	'MYOM2	Ischemic stroke	Inverse variance weighted (multiplicative random effects)	22	-0.0673952	0.035765	0.0595119	0.68095
3600_2	'CHIT1	Cardioembolic stroke	Inverse variance weighted (multiplicative random effects)	8	-0.0366355	0.0194583	0.059732	0.682717
8465_52	'CTSH	Cardioembolic stroke	Inverse variance weighted (multiplicative random effects)	8	-0.0569915	0.030306	0.0600348	0.685425
11356_19	'DGCR14	Large artery stroke	Inverse variance weighted (multiplicative random effects)	2	-0.0567401	0.0301962	0.0602375	0.685712
OID31088	'PLEKHO1	Large artery stroke	Inverse variance weighted (multiplicative random effects)	3	-0.0453211	0.0241219	0.0602663	0.685712
12475_48	'CLIC5	Ischemic stroke	Inverse variance weighted (multiplicative random effects)	22	0.201545	0.107294	0.0603218	0.685712
OID21453	'SORD	Cardioembolic stroke	Inverse variance weighted (multiplicative random effects)	8	0.0231649	0.0123321	0.0603237	0.685712
OID30103	'TEF	Large artery stroke	Inverse variance weighted (multiplicative random effects)	3	-0.0528895	0.0281722	0.0604679	0.686095
19238_12	'GLUL	Cardioembolic stroke	Inverse variance weighted (multiplicative random effects)	8	-0.0410741	0.0218804	0.0604893	0.686095
OID20737	'LAIR1	Cardioembolic stroke	Inverse variance weighted (multiplicative random effects)	8	0.0351841	0.0187511	0.0606036	0.686643
OID31417	'TGFB2	Cardioembolic stroke	Inverse variance weighted (multiplicative random effects)	8	0.0496071	0.026452	0.0607428	0.687471
OID30871	'ARHGEF5	Ischemic stroke	Inverse variance weighted (multiplicative random effects)	23	-0.0715823	0.0382237	0.0611069	0.690142
OID20049	'NPPB	Ischemic stroke	Inverse variance weighted (multiplicative random effects)	23	0.0738074	0.0394233	0.061182	0.690142
OID30374	'CYTL1	Large artery stroke	Inverse variance weighted (multiplicative random effects)	3	-0.0310972	0.0166218	0.0613634	0.690142
OID20249	'ADAMTS13	Large artery stroke	Inverse variance weighted (multiplicative random effects)	3	0.111636	0.0596974	0.0614795	0.690142
5066_134	'CD300C	Large artery stroke	Inverse variance weighted (multiplicative random effects)	2	0.0346142	0.0185101	0.0614809	0.690142
5034_79	'PRSS2	Ischemic stroke	Inverse variance weighted (multiplicative random effects)	22	0.0941051	0.0503405	0.061571	0.690142
5628_21	'SEMA3G	Ischemic stroke	Inverse variance weighted (multiplicative random effects)	22	0.0900803	0.0481972	0.0616234	0.690142
OID20076	'FABP6	Large artery stroke	Inverse variance weighted (multiplicative random effects)	3	0.11682	0.0625048	0.0616262	0.690142
OID20799	'SLC16A1	Large artery stroke	Inverse variance weighted (multiplicative random effects)	3	-0.0505056	0.0270238	0.0616332	0.690142
OID20764	'PLAUR	Cardioembolic stroke	Inverse variance weighted (multiplicative random effects)	8	0.048085	0.0257326	0.061673	0.690142
5736_1	'TREML2	Large artery stroke	Inverse variance weighted (multiplicative random effects)	2	-0.0511959	0.0274099	0.0617914	0.690142
6551_94	'SERPINA12	Cardioembolic stroke	Inverse variance weighted (multiplicative random effects)	8	0.0383232	0.0205231	0.0618573	0.690142
OID20293	'CST6	Large artery stroke	Inverse variance weighted (multiplicative random effects)	3	0.133827	0.0716799	0.0619007	0.690142
OID21529	'FOLR1	Cardioembolic stroke	Inverse variance weighted (multiplicative random effects)	8	0.0486254	0.0260453	0.0619077	0.690142
5092_51	'JAG1	Cardioembolic stroke	Inverse variance weighted (multiplicative random effects)	8	-0.0495354	0.0265722	0.0622969	0.692906
OID20066	'GRK5	Large artery stroke	Inverse variance weighted (multiplicative random effects)	3	-0.0274636	0.0147369	0.0623792	0.692906
OID20154	'LGALS1	Large artery stroke	Inverse variance weighted (multiplicative random effects)	3	-0.0537218	0.0288291	0.0623975	0.692906
OID21307	'MME	Large artery stroke	Inverse variance weighted (multiplicative random effects)	3	0.0442643	0.0237561	0.0624222	0.692906
18289_16	'CCL15	Large artery stroke	Inverse variance weighted (multiplicative random effects)	2	0.0887513	0.0476451	0.0624963	0.692989
3421_54	'TNFSF8	Ischemic stroke	Inverse variance weighted (multiplicative random effects)	22	0.135376	0.072747	0.0627566	0.695135
11646_4	'CHST9	Large artery stroke	Inverse variance weighted (multiplicative random effects)	2	0.0304411	0.0163687	0.0629256	0.696265
OID31008	'GNAS	Cardioembolic stroke	Inverse variance weighted (multiplicative random effects)	8	-0.0151238	0.00813463	0.0630005	0.696353
3311_27	'FCGR3B	Ischemic stroke	Inverse variance weighted (multiplicative random effects)	22	0.188892	0.101646	0.0631228	0.696964
2950_57	'IGFBP4	Ischemic stroke	Inverse variance weighted (multiplicative random effects)	22	0.0911079	0.0491228	0.0636394	0.701251
OID20998	'BCAN	Large artery stroke	Inverse variance weighted (multiplicative random effects)	3	-0.0939671	0.0506656	0.0636459	0.701251
2979_8	'CXCL5	Cardioembolic stroke	Inverse variance weighted (multiplicative random effects)	8	0.037708	0.0203525	0.0639185	0.703509
8013_9	'LMAN2L	Ischemic stroke	Inverse variance weighted (multiplicative random effects)	22	0.0737868	0.0398879	0.0643344	0.707338
15542_19	'CKMT1A	Large artery stroke	Inverse variance weighted (multiplicative random effects)	2	0.0548409	0.0296849	0.0646848	0.71044
OID31447	'HDDC2	Cardioembolic stroke	Inverse variance weighted (multiplicative random effects)	8	0.0370419	0.0200593	0.0648025	0.710982
6379_62	'ADAMTSL2	Ischemic stroke	Inverse variance weighted (multiplicative random effects)	22	0.0895344	0.048518	0.0649814	0.712194
6223_5	'GUCA2B	Large artery stroke	Inverse variance weighted (multiplicative random effects)	2	0.0485877	0.0263475	0.0651671	0.71344
OID20607	'CD84	Large artery stroke	Inverse variance weighted (multiplicative random effects)	3	-0.0723614	0.0392487	0.0652324	0.71344
OID20957	'TNR	Large artery stroke	Inverse variance weighted (multiplicative random effects)	3	0.0688495	0.0373565	0.0653232	0.713683
OID30704	'PON1	Large artery stroke	Inverse variance weighted (multiplicative random effects)	3	-0.0266994	0.0145024	0.0656161	0.716131
OID21494	'NELL1	Ischemic stroke	Inverse variance weighted (multiplicative random effects)	23	-0.101231	0.0550433	0.0658986	0.71846
OID20703	'ANGPTL4	Cardioembolic stroke	Inverse variance weighted (multiplicative random effects)	8	0.0216946	0.0117994	0.0659709	0.718496
OID20361	'SPARCL1	Ischemic stroke	Inverse variance weighted (multiplicative random effects)	23	-0.223808	0.121773	0.0660755	0.718882
13132_14	'SEMA5A	Large artery stroke	Inverse variance weighted (multiplicative random effects)	2	-0.0289699	0.0157954	0.0666429	0.722977
OID31427	'KLK15	Large artery stroke	Inverse variance weighted (multiplicative random effects)	3	-0.075458	0.0411494	0.0666897	0.722977
OID21397	'EPS8L2	Cardioembolic stroke	Inverse variance weighted (multiplicative random effects)	8	0.0213003	0.0116159	0.0666958	0.722977
OID20211	'ANGPTL1	Large artery stroke	Inverse variance weighted (multiplicative random effects)	3	-0.10737	0.0585623	0.0667388	0.722977
10666_7	'GNPTG	Ischemic stroke	Inverse variance weighted (multiplicative random effects)	22	0.0725306	0.0395708	0.0668127	0.722977
10627_87	'APLP2	Ischemic stroke	Inverse variance weighted (multiplicative random effects)	22	0.0927353	0.0506113	0.0669062	0.722977
10948_14	'PLD3	Large artery stroke	Inverse variance weighted (multiplicative random effects)	2	-0.0434884	0.0237379	0.0669476	0.722977
18873_8	'CEACAM8	Ischemic stroke	Inverse variance weighted (multiplicative random effects)	22	0.108689	0.0593401	0.067008	0.722977
OID31438	'GORASP2	Large artery stroke	Inverse variance weighted (multiplicative random effects)	3	-0.0622482	0.0340166	0.0672599	0.724941
OID30924	'LRRC38	Large artery stroke	Inverse variance weighted (multiplicative random effects)	3	0.035681	0.0195035	0.0673294	0.724941
8859_51	'CA11	Large artery stroke	Inverse variance weighted (multiplicative random effects)	2	0.047045	0.0257275	0.0674619	0.724946
10391_1	'ANGPTL3	Ischemic stroke	Inverse variance weighted (multiplicative random effects)	22	0.0760385	0.0415876	0.0674906	0.724946
OID20696	'IL10RB	Large artery stroke	Inverse variance weighted (multiplicative random effects)	3	-0.0698768	0.0382243	0.067539	0.724946
3803_10	'CST5	Cardioembolic stroke	Inverse variance weighted (multiplicative random effects)	8	-0.0183748	0.0100574	0.0676999	0.725925
5487_7	'SLAMF7	Cardioembolic stroke	Inverse variance weighted (multiplicative random effects)	8	0.0185681	0.0101677	0.0678232	0.72629
OID20963	'LPO	Large artery stroke	Inverse variance weighted (multiplicative random effects)	3	-0.0712444	0.0390199	0.0678736	0.72629
13119_26	'SERPINA10	Ischemic stroke	Inverse variance weighted (multiplicative random effects)	22	-0.0703603	0.0385529	0.0679959	0.726812
OID20793	'ODAM	Large artery stroke	Inverse variance weighted (multiplicative random effects)	3	-0.051557	0.0282571	0.0680659	0.726812
OID21509	'P4HB	Large artery stroke	Inverse variance weighted (multiplicative random effects)	3	-0.0250976	0.0137597	0.0681531	0.726812
8250_2	'PTPRJ	Large artery stroke	Inverse variance weighted (multiplicative random effects)	2	-0.0829804	0.0455019	0.068202	0.726812
OID20254	'LTBP2	Large artery stroke	Inverse variance weighted (multiplicative random effects)	3	-0.0658864	0.036143	0.0683131	0.727252
OID30095	'TSPAN15	Cardioembolic stroke	Inverse variance weighted (multiplicative random effects)	8	0.0332585	0.0182679	0.0686678	0.7298
18387_7	'ST13	Large artery stroke	Inverse variance weighted (multiplicative random effects)	2	-0.07831	0.0430177	0.0686961	0.7298
10851_77	'EBI3	Ischemic stroke	Inverse variance weighted (multiplicative random effects)	22	0.0900323	0.049469	0.068763	0.7298
OID20553	'NT5C3A	Large artery stroke	Inverse variance weighted (multiplicative random effects)	3	-0.0388372	0.0213513	0.0689169	0.730688
6520_87	'MGP	Large artery stroke	Inverse variance weighted (multiplicative random effects)	2	-0.0746829	0.0410807	0.069071	0.731195
OID20912	'PTPRN2	Large artery stroke	Inverse variance weighted (multiplicative random effects)	3	-0.0299608	0.0164883	0.0692033	0.731195
OID21378	'MUC16	Cardioembolic stroke	Inverse variance weighted (multiplicative random effects)	8	0.0354507	0.019512	0.0692375	0.731195
13416_8	'TMEM132D	Large artery stroke	Inverse variance weighted (multiplicative random effects)	2	-0.0854856	0.0470525	0.0692459	0.731195
OID30982	'TPSD1	Large artery stroke	Inverse variance weighted (multiplicative random effects)	3	-0.0853871	0.0470289	0.069427	0.732364
9578_263	'MANSC4	Large artery stroke	Inverse variance weighted (multiplicative random effects)	2	-0.0400605	0.0220757	0.0695721	0.733151
8006_12	'DNAJB12	Ischemic stroke	Inverse variance weighted (multiplicative random effects)	22	0.088241	0.0486572	0.0697509	0.734252
18933_4	'TGM4	Cardioembolic stroke	Inverse variance weighted (multiplicative random effects)	8	0.0228988	0.0126297	0.0698178	0.734252
OID30413	'GM2A	Cardioembolic stroke	Inverse variance weighted (multiplicative random effects)	8	0.0211694	0.0116855	0.0700482	0.735522
13536_56	'POLI	Ischemic stroke	Inverse variance weighted (multiplicative random effects)	22	0.0810048	0.0447196	0.07008	0.735522
OID21352	'OMG	Ischemic stroke	Inverse variance weighted (multiplicative random effects)	23	-0.0785364	0.0433743	0.0701921	0.735871
OID31317	'ERI1	Cardioembolic stroke	Inverse variance weighted (multiplicative random effects)	8	0.0304982	0.0168506	0.0703075	0.735871
13481_24	'TCEA2	Large artery stroke	Inverse variance weighted (multiplicative random effects)	2	-0.0352312	0.0194668	0.0703255	0.735871
7948_129	'GLTPD2	Cardioembolic stroke	Inverse variance weighted (multiplicative random effects)	8	0.030934	0.0171014	0.070473	0.736518
OID30362	'CEACAM6	Large artery stroke	Inverse variance weighted (multiplicative random effects)	3	-0.112647	0.0622875	0.070529	0.736518
3168_8	'ADAMTS5	Large artery stroke	Inverse variance weighted (multiplicative random effects)	2	-0.0504926	0.0279413	0.0707468	0.737873
OID30222	'COMMD1	Cardioembolic stroke	Inverse variance weighted (multiplicative random effects)	8	0.0337363	0.0186797	0.0709116	0.737873
3175_51	'ADAMTS13	Ischemic stroke	Inverse variance weighted (multiplicative random effects)	22	0.121467	0.0672833	0.0710278	0.737873
11659_31	'CLINT1	Large artery stroke	Inverse variance weighted (multiplicative random effects)	2	-0.0592074	0.0328057	0.0711072	0.737873
OID20787	'TFF2	Large artery stroke	Inverse variance weighted (multiplicative random effects)	3	0.124512	0.0690048	0.0711686	0.737873
3810_50	'FGR	Ischemic stroke	Inverse variance weighted (multiplicative random effects)	22	0.0509559	0.0282457	0.0712278	0.737873
OID20235	'PCSK9	Large artery stroke	Inverse variance weighted (multiplicative random effects)	3	0.0490086	0.0271709	0.0712764	0.737873
OID21166	'RAD23B	Large artery stroke	Inverse variance weighted (multiplicative random effects)	3	-0.0405617	0.0224884	0.0712832	0.737873
8957_72	'ERLEC1	Cardioembolic stroke	Inverse variance weighted (multiplicative random effects)	8	-0.0299248	0.0165919	0.0712972	0.737873
5465_32	'HS6ST1	Ischemic stroke	Inverse variance weighted (multiplicative random effects)	22	0.108031	0.0599486	0.0715357	0.739605
OID21482	'TNFRSF12A	Large artery stroke	Inverse variance weighted (multiplicative random effects)	3	-0.092845	0.0515403	0.071639	0.739938
7806_33	'B4GALT7	Ischemic stroke	Inverse variance weighted (multiplicative random effects)	22	0.0821708	0.0456386	0.0717868	0.740728
OID20639	'FCRL2	Ischemic stroke	Inverse variance weighted (multiplicative random effects)	23	0.109677	0.0609565	0.0719767	0.741863
19558_10	'LRP4	Large artery stroke	Inverse variance weighted (multiplicative random effects)	2	-0.0629313	0.0349838	0.0720394	0.741863
2635_61	'LAYN	Cardioembolic stroke	Inverse variance weighted (multiplicative random effects)	8	0.0389422	0.0216564	0.0721483	0.74225
OID30375	'PDIA4	Large artery stroke	Inverse variance weighted (multiplicative random effects)	3	-0.0234689	0.0130782	0.0727329	0.747525
3191_50	'WFIKKN1	Large artery stroke	Inverse variance weighted (multiplicative random effects)	2	0.0242893	0.0135511	0.0730649	0.749473
12395_86	'DARS2	Ischemic stroke	Inverse variance weighted (multiplicative random effects)	22	0.0634075	0.0353806	0.0731077	0.749473
18899_82	'HDGFRP3	Ischemic stroke	Inverse variance weighted (multiplicative random effects)	22	0.074745	0.0417112	0.0731386	0.749473
5095_21	'KIR2DL4	Cardioembolic stroke	Inverse variance weighted (multiplicative random effects)	8	-0.0301931	0.0168736	0.0735555	0.752579
7206_20	'FBP1	Ischemic stroke	Inverse variance weighted (multiplicative random effects)	22	0.0538632	0.0301204	0.0737336	0.752579
7145_1	'ITIH3	Cardioembolic stroke	Inverse variance weighted (multiplicative random effects)	8	0.0291636	0.0163176	0.0738972	0.752579
12438_127	'MPG	Large artery stroke	Inverse variance weighted (multiplicative random effects)	2	-0.0210255	0.0117653	0.0739254	0.752579
OID30575	'BMP10	Cardioembolic stroke	Inverse variance weighted (multiplicative random effects)	8	0.0340359	0.0190483	0.0739664	0.752579
OID21265	'CD28	Ischemic stroke	Inverse variance weighted (multiplicative random effects)	23	0.191636	0.107253	0.0739756	0.752579
OID21064	'JAM2	Ischemic stroke	Inverse variance weighted (multiplicative random effects)	23	-0.115793	0.0648154	0.0740186	0.752579
OID31020	'LRTM2	Cardioembolic stroke	Inverse variance weighted (multiplicative random effects)	8	0.0278175	0.015571	0.0740206	0.752579
3554_24	'ADIPOQ	Ischemic stroke	Inverse variance weighted (multiplicative random effects)	22	0.0789485	0.0442116	0.0741486	0.752728
OID21373	'DEFB4A;DEFB4B	Large artery stroke	Inverse variance weighted (multiplicative random effects)	3	-0.0822397	0.046068	0.0742319	0.752728
OID20255	'TGFBR3	Large artery stroke	Inverse variance weighted (multiplicative random effects)	3	-0.0715589	0.0400878	0.0742524	0.752728
4254_6	'NUDCD3	Large artery stroke	Inverse variance weighted (multiplicative random effects)	2	-0.0697213	0.0390715	0.0743499	0.752983
OID20678	'IFNGR1	Ischemic stroke	Inverse variance weighted (multiplicative random effects)	23	-0.115576	0.0648301	0.0746273	0.754268
OID20383	'HSPG2	Cardioembolic stroke	Inverse variance weighted (multiplicative random effects)	8	0.0309761	0.017379	0.074685	0.754268
OID30648	'SFRP4	Cardioembolic stroke	Inverse variance weighted (multiplicative random effects)	8	0.0235976	0.0132399	0.0746998	0.754268
5231_79	'PCSK9	Ischemic stroke	Inverse variance weighted (multiplicative random effects)	22	0.115846	0.0650186	0.0747923	0.754268
OID20801	'CALB2	Cardioembolic stroke	Inverse variance weighted (multiplicative random effects)	8	0.0370203	0.0207845	0.0748884	0.754268
OID20762	'CXCL1	Large artery stroke	Inverse variance weighted (multiplicative random effects)	3	-0.064595	0.0362689	0.0749119	0.754268
OID30576	'CD300A	Large artery stroke	Inverse variance weighted (multiplicative random effects)	3	0.172079	0.0967192	0.075214	0.755935
OID30815	'CRYM	Large artery stroke	Inverse variance weighted (multiplicative random effects)	3	-0.0643232	0.0361548	0.0752229	0.755935
9981_18	'KIAA1467	Large artery stroke	Inverse variance weighted (multiplicative random effects)	2	-0.0260585	0.0146536	0.0753557	0.756392
OID20949	'GLB1	Large artery stroke	Inverse variance weighted (multiplicative random effects)	3	-0.0614459	0.0345689	0.0754878	0.756392
OID20583	'ANXA11	Large artery stroke	Inverse variance weighted (multiplicative random effects)	3	-0.032366	0.0182094	0.0754963	0.756392
OID20284	'LGALS3	Ischemic stroke	Inverse variance weighted (multiplicative random effects)	23	-0.065327	0.0367614	0.0755592	0.756392
17343_6	'SNPH	Large artery stroke	Inverse variance weighted (multiplicative random effects)	2	0.0317051	0.0178642	0.0759338	0.759411
3046_31	'RETN	Cardioembolic stroke	Inverse variance weighted (multiplicative random effects)	8	-0.0351151	0.0197918	0.0760255	0.759598
3326_58	'CADM1	Cardioembolic stroke	Inverse variance weighted (multiplicative random effects)	8	-0.0229956	0.012965	0.076119	0.759802
OID20950	'RHOC	Large artery stroke	Inverse variance weighted (multiplicative random effects)	3	-0.0407897	0.0230315	0.0765535	0.763407
OID20078	'TSPAN1	Large artery stroke	Inverse variance weighted (multiplicative random effects)	3	0.133928	0.0756403	0.0766297	0.763434
16872_248	'GSTZ1	Cardioembolic stroke	Inverse variance weighted (multiplicative random effects)	8	-0.0172393	0.00974085	0.0767618	0.764019
3038_9	'CXCL11	Cardioembolic stroke	Inverse variance weighted (multiplicative random effects)	8	0.0315873	0.0178643	0.0770302	0.765957
11351_233	'NHEJ1	Large artery stroke	Inverse variance weighted (multiplicative random effects)	2	-0.052096	0.0294918	0.0773194	0.768099
OID31317	'ERI1	Large artery stroke	Inverse variance weighted (multiplicative random effects)	3	-0.0290631	0.0164611	0.0774701	0.768861
15525_294	'ADH1C	Cardioembolic stroke	Inverse variance weighted (multiplicative random effects)	8	-0.0399503	0.0226394	0.077625	0.769522
OID31013	'GPR158	Cardioembolic stroke	Inverse variance weighted (multiplicative random effects)	8	0.0324972	0.0184195	0.0776847	0.769522
OID30733	'APOA4	Large artery stroke	Inverse variance weighted (multiplicative random effects)	3	-0.0368455	0.0208968	0.0778641	0.770565
OID20759	'SPON1	Cardioembolic stroke	Inverse variance weighted (multiplicative random effects)	8	0.0374529	0.0212734	0.078315	0.773604
19448_104	'UPP1	Ischemic stroke	Inverse variance weighted (multiplicative random effects)	22	0.085138	0.0483782	0.0784345	0.773604
OID21510	'ERBB4	Ischemic stroke	Inverse variance weighted (multiplicative random effects)	23	-0.181393	0.103076	0.0784424	0.773604
OID21241	'CEP85	Large artery stroke	Inverse variance weighted (multiplicative random effects)	3	0.0165151	0.0093866	0.0785033	0.773604
OID31437	'GPHA2	Large artery stroke	Inverse variance weighted (multiplicative random effects)	3	-0.12799	0.0727546	0.078543	0.773604
3607_71	'DKK3	Large artery stroke	Inverse variance weighted (multiplicative random effects)	2	-0.0442413	0.0251615	0.0786968	0.774386
3309_2	'FCGR2A	Ischemic stroke	Inverse variance weighted (multiplicative random effects)	22	0.0678821	0.0386248	0.0788367	0.774886
OID30529	'S100A13	Cardioembolic stroke	Inverse variance weighted (multiplicative random effects)	8	0.0622043	0.0354061	0.0789382	0.774886
OID20365	'CTSZ	Ischemic stroke	Inverse variance weighted (multiplicative random effects)	23	-0.0908463	0.0517187	0.078995	0.774886
OID20500	'PARP1	Large artery stroke	Inverse variance weighted (multiplicative random effects)	3	-0.0491451	0.0279906	0.0791276	0.774886
OID20225	'CA13	Large artery stroke	Inverse variance weighted (multiplicative random effects)	3	-0.0494421	0.0281666	0.0792004	0.774886
OID20887	'HMOX2	Cardioembolic stroke	Inverse variance weighted (multiplicative random effects)	8	0.0287777	0.016397	0.0792482	0.774886
OID20188	'LPL	Large artery stroke	Inverse variance weighted (multiplicative random effects)	3	0.051474	0.0293309	0.0792692	0.774886
OID30635	'RIDA	Cardioembolic stroke	Inverse variance weighted (multiplicative random effects)	8	0.02194	0.0125082	0.0794227	0.774886
6373_54	'DLK1	Cardioembolic stroke	Inverse variance weighted (multiplicative random effects)	8	-0.0331452	0.0189003	0.0794848	0.774886
9335_28	'PSG9	Cardioembolic stroke	Inverse variance weighted (multiplicative random effects)	8	0.022081	0.0125915	0.0794927	0.774886
3212_30	'ASAH2	Ischemic stroke	Inverse variance weighted (multiplicative random effects)	22	-0.0689255	0.0393305	0.0796932	0.775956
OID21507	'FGFBP1	Large artery stroke	Inverse variance weighted (multiplicative random effects)	3	-0.0711079	0.0405837	0.0797517	0.775956
6461_54	'APOC3	Cardioembolic stroke	Inverse variance weighted (multiplicative random effects)	8	0.0347172	0.0198223	0.0798732	0.776412
8402_22	'CYTL1	Ischemic stroke	Inverse variance weighted (multiplicative random effects)	22	0.0977563	0.0558301	0.0799529	0.776461
OID20382	'FCN2	Ischemic stroke	Inverse variance weighted (multiplicative random effects)	23	-0.0755981	0.0431889	0.0800488	0.776668
17329_2	'BDH2	Ischemic stroke	Inverse variance weighted (multiplicative random effects)	22	0.0687821	0.0393132	0.0801885	0.777297
16809_1	'NME4	Ischemic stroke	Inverse variance weighted (multiplicative random effects)	22	0.0582917	0.0333679	0.0806477	0.780714
15613_16	'PNLIP	Ischemic stroke	Inverse variance weighted (multiplicative random effects)	22	0.120182	0.0688054	0.080691	0.780714
OID20370	'KIT	Ischemic stroke	Inverse variance weighted (multiplicative random effects)	23	-0.0536683	0.0307395	0.0808275	0.780967
6086_15	'CHRDL2	Ischemic stroke	Inverse variance weighted (multiplicative random effects)	22	0.0515966	0.0295636	0.0809367	0.780967
OID20644	'PRDX5	Cardioembolic stroke	Inverse variance weighted (multiplicative random effects)	8	0.039055	0.022378	0.0809425	0.780967
19365_11	'BCAT2	Ischemic stroke	Inverse variance weighted (multiplicative random effects)	22	0.0583636	0.0334715	0.081215	0.782662
19614_8	'TCN1	Cardioembolic stroke	Inverse variance weighted (multiplicative random effects)	8	-0.0200841	0.0115203	0.0812687	0.782662
9213_24	'FTCD	Cardioembolic stroke	Inverse variance weighted (multiplicative random effects)	8	-0.0300015	0.0172201	0.0814662	0.783325
OID21418	'CD300E	Cardioembolic stroke	Inverse variance weighted (multiplicative random effects)	8	0.0411424	0.0236163	0.0814881	0.783325
17702_53	'UGT1A1	Large artery stroke	Inverse variance weighted (multiplicative random effects)	2	-0.0394478	0.0226534	0.0816197	0.783673
4979_34	'DPT	Ischemic stroke	Inverse variance weighted (multiplicative random effects)	22	0.0839157	0.0481983	0.081675	0.783673
OID30697	'CR1	Ischemic stroke	Inverse variance weighted (multiplicative random effects)	23	0.134059	0.0770405	0.0818403	0.784536
OID20075	'CA5A	Ischemic stroke	Inverse variance weighted (multiplicative random effects)	23	0.0635737	0.0365699	0.0821376	0.785978
3890_8	'LDHB	Ischemic stroke	Inverse variance weighted (multiplicative random effects)	22	0.0663195	0.038165	0.0822627	0.785978
4413_3	'SLPI	Ischemic stroke	Inverse variance weighted (multiplicative random effects)	22	0.0975994	0.0561756	0.0823168	0.785978
9848_22	'CCNH	Ischemic stroke	Inverse variance weighted (multiplicative random effects)	22	0.0724236	0.0416907	0.0823585	0.785978
15604_18	'MAPK9	Large artery stroke	Inverse variance weighted (multiplicative random effects)	2	-0.035938	0.0206932	0.082439	0.785978
OID21476	'ATOX1	Large artery stroke	Inverse variance weighted (multiplicative random effects)	3	-0.0299606	0.0172546	0.0824966	0.785978
OID20076	'FABP6	Cardioembolic stroke	Inverse variance weighted (multiplicative random effects)	8	0.0483037	0.0278207	0.0825198	0.785978
8297_8	'DNAJC10	Large artery stroke	Inverse variance weighted (multiplicative random effects)	2	-0.052693	0.0303698	0.0827321	0.78728
5703_26	'OLFM1	Cardioembolic stroke	Inverse variance weighted (multiplicative random effects)	8	-0.0569913	0.0328632	0.0828825	0.787989
15444_45	'SERPINB4	Large artery stroke	Inverse variance weighted (multiplicative random effects)	2	-0.0505629	0.0291687	0.0830135	0.788514
11431_235	'RECQL	Ischemic stroke	Inverse variance weighted (multiplicative random effects)	22	0.0887211	0.0511959	0.0831007	0.788622
14066_49	'MAGI2	Large artery stroke	Inverse variance weighted (multiplicative random effects)	2	-0.081847	0.0472774	0.0834148	0.790555
13676_46	'INHBB	Large artery stroke	Inverse variance weighted (multiplicative random effects)	2	0.0366416	0.0211727	0.083522	0.790555
OID21420	'PVALB	Large artery stroke	Inverse variance weighted (multiplicative random effects)	3	-0.0301302	0.0174108	0.0835324	0.790555
5763_67	'DEFB104A	Large artery stroke	Inverse variance weighted (multiplicative random effects)	2	-0.0585875	0.0338902	0.0838543	0.792004
16785_45	'DEFA5	Ischemic stroke	Inverse variance weighted (multiplicative random effects)	22	0.149348	0.0864051	0.0839058	0.792004
OID21074	'NPTX1	Ischemic stroke	Inverse variance weighted (multiplicative random effects)	23	-0.133437	0.0772071	0.0839338	0.792004
6923_1	'PLOD2	Cardioembolic stroke	Inverse variance weighted (multiplicative random effects)	8	-0.0707686	0.0409543	0.0839901	0.792004
OID20722	'FIS1	Cardioembolic stroke	Inverse variance weighted (multiplicative random effects)	8	0.0402812	0.0233454	0.0844477	0.795598
3290_50	'CD109	Large artery stroke	Inverse variance weighted (multiplicative random effects)	2	-0.0946652	0.0548977	0.0846372	0.796218
OID21510	'ERBB4	Large artery stroke	Inverse variance weighted (multiplicative random effects)	3	-0.211206	0.122493	0.0846666	0.796218
9759_13	'IDO1	Ischemic stroke	Inverse variance weighted (multiplicative random effects)	22	0.104109	0.0604262	0.0849044	0.797346
OID20503	'FGF2	Large artery stroke	Inverse variance weighted (multiplicative random effects)	3	-0.0422313	0.0245199	0.0850095	0.797346
17766_5	'NCF1	Ischemic stroke	Inverse variance weighted (multiplicative random effects)	22	0.066705	0.0387303	0.0850165	0.797346
15615_8	'LILRB3	Ischemic stroke	Inverse variance weighted (multiplicative random effects)	22	0.0614214	0.0356811	0.0851783	0.798144
OID20543	'PROK1	Cardioembolic stroke	Inverse variance weighted (multiplicative random effects)	8	-0.0272636	0.015842	0.085256	0.798153
OID30186	'PACS2	Large artery stroke	Inverse variance weighted (multiplicative random effects)	3	-0.0617739	0.0359127	0.0854117	0.798891
OID20092	'MPHOSPH8	Cardioembolic stroke	Inverse variance weighted (multiplicative random effects)	8	0.041524	0.0241553	0.0856068	0.79994
8351_17	'PRSS57	Large artery stroke	Inverse variance weighted (multiplicative random effects)	2	-0.0102475	0.00596249	0.0856776	0.79994
12831_21	'TESC	Cardioembolic stroke	Inverse variance weighted (multiplicative random effects)	8	-0.0308284	0.0179442	0.0857945	0.800312
OID31153	'GIPC2	Cardioembolic stroke	Inverse variance weighted (multiplicative random effects)	8	0.0556683	0.0324169	0.0859314	0.800872
OID20390	'NRP1	Ischemic stroke	Inverse variance weighted (multiplicative random effects)	23	0.0619264	0.0360787	0.086084	0.801575
2278_61	'TIMP2	Large artery stroke	Inverse variance weighted (multiplicative random effects)	2	-0.0696757	0.0406231	0.0863127	0.802986
OID30239	'ECHS1	Cardioembolic stroke	Inverse variance weighted (multiplicative random effects)	8	0.030062	0.0175674	0.0870376	0.805063
OID30700	'GSR	Ischemic stroke	Inverse variance weighted (multiplicative random effects)	23	0.0946117	0.0552997	0.0871016	0.805063
16302_11	'BPIFA2	Large artery stroke	Inverse variance weighted (multiplicative random effects)	2	-0.103392	0.0604995	0.0874555	0.805063
OID21085	'NID2	Ischemic stroke	Inverse variance weighted (multiplicative random effects)	23	0.0792789	0.0464312	0.0877385	0.805063
6077_63	'CECR1	Cardioembolic stroke	Inverse variance weighted (multiplicative random effects)	8	-0.0311853	0.0182675	0.087795	0.805063
OID21244	'AKR1B1	Large artery stroke	Inverse variance weighted (multiplicative random effects)	3	-0.0823797	0.0482738	0.0879136	0.805063
OID21137	'HAVCR2	Cardioembolic stroke	Inverse variance weighted (multiplicative random effects)	8	0.0393769	0.0230834	0.0880349	0.805063
19614_8	'TCN1	Ischemic stroke	Inverse variance weighted (multiplicative random effects)	22	0.0759398	0.044543	0.0882197	0.805063
13748_4	'CCL8	Ischemic stroke	Inverse variance weighted (multiplicative random effects)	22	0.0653437	0.0383286	0.0882263	0.805063
OID21446	'TNFRSF19	Cardioembolic stroke	Inverse variance weighted (multiplicative random effects)	8	0.0411957	0.0241724	0.0883355	0.805063
OID30280	'LAMB1	Ischemic stroke	Inverse variance weighted (multiplicative random effects)	23	-0.107429	0.0630443	0.0883772	0.805063
7945_10	'SEMA6A	Large artery stroke	Inverse variance weighted (multiplicative random effects)	2	0.0148477	0.00871378	0.0883932	0.805063
OID30360	'CMC1	Large artery stroke	Inverse variance weighted (multiplicative random effects)	3	-0.0391407	0.0229713	0.0884004	0.805063
OID21258	'PLXDC1	Ischemic stroke	Inverse variance weighted (multiplicative random effects)	23	-0.064962	0.0381404	0.0885246	0.805063
17345_12	'ZADH2	Large artery stroke	Inverse variance weighted (multiplicative random effects)	2	-0.0600485	0.0352814	0.0887578	0.805063
OID20405	'COMP	Ischemic stroke	Inverse variance weighted (multiplicative random effects)	23	-0.0948149	0.0557259	0.0888582	0.805063
OID20061	'CTF1	Cardioembolic stroke	Inverse variance weighted (multiplicative random effects)	8	0.0443022	0.0260384	0.0888646	0.805063
OID30626	'FUOM	Ischemic stroke	Inverse variance weighted (multiplicative random effects)	23	0.0718014	0.0422068	0.0889092	0.805063
OID20669	'KYNU	Ischemic stroke	Inverse variance weighted (multiplicative random effects)	23	0.0791828	0.0465553	0.088974	0.805063
OID30383	'PRG3	Cardioembolic stroke	Inverse variance weighted (multiplicative random effects)	8	0.0303452	0.0178462	0.08906	0.805063
OID21272	'FLT3	Cardioembolic stroke	Inverse variance weighted (multiplicative random effects)	8	0.0567046	0.0333515	0.0890912	0.805063
5091_28	'LILRB2	Ischemic stroke	Inverse variance weighted (multiplicative random effects)	22	0.0806303	0.0474373	0.0891829	0.805063
3309_2	'FCGR2A	Large artery stroke	Inverse variance weighted (multiplicative random effects)	2	-0.0656831	0.0386454	0.0891991	0.805063
5728_60	'FCRL1	Ischemic stroke	Inverse variance weighted (multiplicative random effects)	22	0.0917194	0.0539681	0.0892232	0.805063
OID31374	'SNX2	Large artery stroke	Inverse variance weighted (multiplicative random effects)	3	-0.0599657	0.0352959	0.0893302	0.805063
OID30194	'PNMA1	Large artery stroke	Inverse variance weighted (multiplicative random effects)	3	-0.0474739	0.0279462	0.0893641	0.805063
OID30754	'BTD	Large artery stroke	Inverse variance weighted (multiplicative random effects)	3	0.0283029	0.0166657	0.0894567	0.805063
OID31338	'FAM171B	Large artery stroke	Inverse variance weighted (multiplicative random effects)	3	-0.0746568	0.0439681	0.0895122	0.805063
15384_15	'KL	Large artery stroke	Inverse variance weighted (multiplicative random effects)	2	-0.0735589	0.0433242	0.0895323	0.805063
OID20658	'AGRP	Large artery stroke	Inverse variance weighted (multiplicative random effects)	3	-0.0569296	0.0335307	0.0895392	0.805063
15603_20	'ITGA2	Large artery stroke	Inverse variance weighted (multiplicative random effects)	2	-0.065546	0.0386067	0.0895471	0.805063
OID30737	'PROS1	Cardioembolic stroke	Inverse variance weighted (multiplicative random effects)	8	-0.0374712	0.0220718	0.0895649	0.805063
OID21522	'ITGB5	Cardioembolic stroke	Inverse variance weighted (multiplicative random effects)	8	0.0371852	0.0219064	0.0896102	0.805063
2687_2	'MIA	Ischemic stroke	Inverse variance weighted (multiplicative random effects)	22	0.0862214	0.0508001	0.0896462	0.805063
8768_4	'BCL10	Large artery stroke	Inverse variance weighted (multiplicative random effects)	2	-0.0290174	0.0170997	0.0897068	0.805063
8310_6	'ZG16B	Large artery stroke	Inverse variance weighted (multiplicative random effects)	2	0.0265176	0.0156282	0.0897382	0.805063
OID20417	'TGFBI	Ischemic stroke	Inverse variance weighted (multiplicative random effects)	23	-0.0657424	0.0387505	0.0897805	0.805063
8304_50	'TNFRSF11B	Cardioembolic stroke	Inverse variance weighted (multiplicative random effects)	8	-0.0383607	0.0226133	0.0898142	0.805063
OID21074	'NPTX1	Cardioembolic stroke	Inverse variance weighted (multiplicative random effects)	8	-0.0489618	0.0288641	0.0898312	0.805063
18413_24	'ARL4D	Ischemic stroke	Inverse variance weighted (multiplicative random effects)	22	0.0658614	0.0388298	0.0898564	0.805063
OID20334	'CCL16	Cardioembolic stroke	Inverse variance weighted (multiplicative random effects)	8	0.0162967	0.00960841	0.0898694	0.805063
19563_3	'SEZ6L	Ischemic stroke	Inverse variance weighted (multiplicative random effects)	22	0.115149	0.0678936	0.0898807	0.805063
OID20128	'LEPR	Ischemic stroke	Inverse variance weighted (multiplicative random effects)	23	0.0584661	0.0344776	0.0899293	0.805063
OID20343	'MCAM	Ischemic stroke	Inverse variance weighted (multiplicative random effects)	23	-0.177268	0.104551	0.089975	0.805063
7856_51	'FAM151A	Large artery stroke	Inverse variance weighted (multiplicative random effects)	2	0.019699	0.0116208	0.0900463	0.805063
OID30783	'TF	Cardioembolic stroke	Inverse variance weighted (multiplicative random effects)	8	0.0410775	0.0242361	0.0900965	0.805063
15594_47	'HTRA1	Cardioembolic stroke	Inverse variance weighted (multiplicative random effects)	8	-0.0276818	0.0163441	0.0903239	0.806403
3041_55	'MRC2	Cardioembolic stroke	Inverse variance weighted (multiplicative random effects)	8	-0.0329231	0.0194448	0.0904253	0.806616
OID30189	'VSIG10L	Ischemic stroke	Inverse variance weighted (multiplicative random effects)	23	-0.0634096	0.0374775	0.0906577	0.807391
OID30698	'C9	Large artery stroke	Inverse variance weighted (multiplicative random effects)	3	0.0593131	0.0350574	0.0906676	0.807391
OID30945	'MDM1	Large artery stroke	Inverse variance weighted (multiplicative random effects)	3	0.0215156	0.012725	0.0908718	0.808202
3194_36	'GP6	Ischemic stroke	Inverse variance weighted (multiplicative random effects)	22	0.0832664	0.0492573	0.0909443	0.808202
13123_3	'FLRT3	Cardioembolic stroke	Inverse variance weighted (multiplicative random effects)	8	-0.0369095	0.0218436	0.0910814	0.808202
OID21515	'CREG1	Large artery stroke	Inverse variance weighted (multiplicative random effects)	3	-0.0677884	0.0401194	0.0910922	0.808202
OID30141	'MANSC4	Cardioembolic stroke	Inverse variance weighted (multiplicative random effects)	8	0.0313617	0.0185736	0.0913127	0.808202
8974_172	'COL15A1	Large artery stroke	Inverse variance weighted (multiplicative random effects)	2	0.0486465	0.0288174	0.0913928	0.808202
OID20203	'RNASE3	Ischemic stroke	Inverse variance weighted (multiplicative random effects)	23	0.0793658	0.0470208	0.0914333	0.808202
OID21419	'CLMP	Cardioembolic stroke	Inverse variance weighted (multiplicative random effects)	8	0.0301258	0.0178531	0.0915211	0.808202
5542_22	'NRP1	Large artery stroke	Inverse variance weighted (multiplicative random effects)	2	0.0559233	0.0331441	0.0915499	0.808202
16900_29	'MDGA1	Ischemic stroke	Inverse variance weighted (multiplicative random effects)	22	0.05933	0.0351679	0.0915936	0.808202
11390_24	'CA8	Cardioembolic stroke	Inverse variance weighted (multiplicative random effects)	8	-0.0218662	0.012962	0.0916133	0.808202
OID21012	'TXNDC5	Large artery stroke	Inverse variance weighted (multiplicative random effects)	3	-0.021451	0.0127243	0.0918287	0.809287
OID20823	'IDI2	Ischemic stroke	Inverse variance weighted (multiplicative random effects)	23	-0.0547236	0.0324672	0.0918919	0.809287
OID30059	'GCLM	Large artery stroke	Inverse variance weighted (multiplicative random effects)	3	-0.0613047	0.036405	0.0921886	0.809532
OID20510	'NUB1	Large artery stroke	Inverse variance weighted (multiplicative random effects)	3	-0.0353437	0.0209893	0.0922027	0.809532
OID31351	'AMOTL2	Large artery stroke	Inverse variance weighted (multiplicative random effects)	3	-0.0589633	0.0350297	0.0923297	0.809532
16060_99	'NID2	Ischemic stroke	Inverse variance weighted (multiplicative random effects)	22	0.0665683	0.0395696	0.0925091	0.809532
6627_25	'PNLIPRP1	Cardioembolic stroke	Inverse variance weighted (multiplicative random effects)	8	0.0619564	0.0368384	0.0925996	0.809532
5803_24	'C3	Cardioembolic stroke	Inverse variance weighted (multiplicative random effects)	8	0.024078	0.0143216	0.0927164	0.809532
11248_43	'UROS	Large artery stroke	Inverse variance weighted (multiplicative random effects)	2	-0.098033	0.0583367	0.0928662	0.809532
12457_10	'ADI1	Large artery stroke	Inverse variance weighted (multiplicative random effects)	2	-0.0578654	0.0344375	0.0928987	0.809532
OID21480	'DCXR	Ischemic stroke	Inverse variance weighted (multiplicative random effects)	23	0.0712368	0.0424067	0.0929865	0.809532
OID21379	'GCNT1	Ischemic stroke	Inverse variance weighted (multiplicative random effects)	23	0.21804	0.129809	0.0930151	0.809532
OID20295	'DLK1	Large artery stroke	Inverse variance weighted (multiplicative random effects)	3	0.0433524	0.0258147	0.0930805	0.809532
10772_21	'CSGALNACT2	Large artery stroke	Inverse variance weighted (multiplicative random effects)	2	-0.0972328	0.0578996	0.0930867	0.809532
14067_6	'PKP2	Large artery stroke	Inverse variance weighted (multiplicative random effects)	2	-0.047369	0.0282078	0.0930961	0.809532
OID31285	'GAS2	Cardioembolic stroke	Inverse variance weighted (multiplicative random effects)	8	0.0187992	0.0111958	0.0931277	0.809532
OID20275	'MSMB	Large artery stroke	Inverse variance weighted (multiplicative random effects)	3	0.0529716	0.0315513	0.0931708	0.809532
6605_17	'IGFALS	Cardioembolic stroke	Inverse variance weighted (multiplicative random effects)	8	0.0481428	0.0286803	0.0932297	0.809532
13682_47	'CSF1R	Cardioembolic stroke	Inverse variance weighted (multiplicative random effects)	8	0.056271	0.0335264	0.093268	0.809532
OID30751	'LRG1	Cardioembolic stroke	Inverse variance weighted (multiplicative random effects)	8	0.0414966	0.0247278	0.0933207	0.809532
15521_4	'CLSTN1	Ischemic stroke	Inverse variance weighted (multiplicative random effects)	22	0.116408	0.0694679	0.0937955	0.812972
OID20321	'RNASET2	Large artery stroke	Inverse variance weighted (multiplicative random effects)	3	-0.0920272	0.054943	0.0939425	0.813569
OID21410	'DPY30	Cardioembolic stroke	Inverse variance weighted (multiplicative random effects)	8	0.0385603	0.0230395	0.0941977	0.815029
7841_84	'ESAM	Large artery stroke	Inverse variance weighted (multiplicative random effects)	2	-0.0251485	0.0150293	0.0942679	0.815029
3535_84	'DKK1	Ischemic stroke	Inverse variance weighted (multiplicative random effects)	22	0.0728254	0.0435721	0.0946471	0.817628
17819_30	'FAHD1	Ischemic stroke	Inverse variance weighted (multiplicative random effects)	22	0.0589982	0.0353222	0.0948621	0.818665
6462_12	'TIMP4	Cardioembolic stroke	Inverse variance weighted (multiplicative random effects)	8	0.0219438	0.0131423	0.0949779	0.818665
18216_22	'IL11RA	Large artery stroke	Inverse variance weighted (multiplicative random effects)	2	-0.0750607	0.0449616	0.0950299	0.818665
7110_2	'DNAJB11	Ischemic stroke	Inverse variance weighted (multiplicative random effects)	22	0.0768914	0.0460742	0.095145	0.818665
17333_20	'ACADM	Large artery stroke	Inverse variance weighted (multiplicative random effects)	2	-0.0728752	0.0436697	0.0951607	0.818665
[truncated: 9,192 more rows]

## Sheet: Table S5
Table S5. Results of the co-localisation analysis between plasma protein abundance and ischemic stroke phenotypes assuming a single causal variant.
[truncated: 22 more rows]

[truncated: 4 more sheets: Table S6, Table S7, Table S8, Table S9]
